# Supplementary material for: Simultaneous enumeration of cancer and immune cell types from bulk tumor gene expression data
Source: eLife journal article supplement (doi:10.7554/elife.26476), 2017-11-13
Supplement: supp [file elife-26476-supp-v1.zip]

Archive with 18 entries (18 files):
- elife_poa_e26476_Supplementary_File_2.xlsx
- elife_poa_e26476_Figure_5_figure_supplement_1.pdf
- elife_poa_e26476_Supplementary_File_1.xlsx
- elife_poa_e26476_Figure_2_figure_supplement_1.pdf
- elife_poa_e26476_Figure_1_figure_supplement_2.pdf
- elife_poa_e26476_Figure_2_figure_supplement_2.pdf
- elife_poa_e26476_Figure_3_figure_supplement_1.pdf
- elife_poa_e26476_Figure_2_figure_supplement_3.pdf
- elife_poa_e26476_Figure_5_figure_supplement_3.pdf
- elife_poa_e26476_Figure_1_figure_supplement_1.pdf
- elife_poa_e26476_Figure_5_figure_supplement_6.pdf
- elife_poa_e26476_Figure_5_figure_supplement_4.pdf
- elife_poa_e26476_Transparent_Reporting_File.docx
- elife_poa_e26476_Supplementary_File_3.xlsx
- elife_poa_e26476_Figure_4_figure_supplement_1.pdf
- elife_poa_e26476_Figure_5_figure_supplement_2.pdf
- elife_poa_e26476_Figure_5_figure_supplement_5.pdf
- elife_poa_e26476_Figure_2_figure_supplement_4.pdf
