# Supplementary material for: Simultaneous enumeration of cancer and immune cell types from bulk tumor gene expression data
Source: eLife journal article supplement (doi:10.7554/elife.26476), 2017-11-13
Supplement: supp [file elife-26476-supp-v1.zip › elife_poa_e26476_Supplementary_File_1.xlsx]

## Sheet: SupplFile 1A
Supplementary File 1A
Gene expression reference profiles, built from TPM (transcript per million) normalized RNA-Seq data of immune cells sorted from blood
Gene	Bcells	CD4_Tcells	CD8_Tcells	Monocytes	Neutrophils	NKcells
5S_rRNA	0	0	0	0	0	0
5S_rRNA.148	0	0	0	0	0	0
5S_rRNA.17	0	0	0	0	0	0
5S_rRNA.251	0	0	0	0	0	0
5S_rRNA.279	0	0	0	0	0	0
5S_rRNA.341	0	0	0	0	0	0
5S_rRNA.36	0	0	0	0	0	0
5S_rRNA.369	0	0	0	0	0	0
5S_rRNA.377	0	0	0	0	0	0
5S_rRNA.389	0	0	0	0	0	0
5S_rRNA.407	0	0	0	0	0	0
5S_rRNA.430	0	0	0	0	0	0
5S_rRNA.448	0	0	0	0	0	0
5S_rRNA.470	0	0	0	0	0	0
5S_rRNA.473	0	0	0	0	0	0
5S_rRNA.48	0	0	0	0	0	0
5S_rRNA.486	0	0	0	0	0	0
5S_rRNA.61	0	0	0	0	0	0
7SK.13	0	0	0	0	0	0
7SK.139	0	0	0	0	0	0
7SK.160	0	0	0	0	0	0
7SK.176	0	0	0	0	0	0
7SK.208	0	0	0	0	0	0
7SK.234	0	0	0	0	0	0
7SK.258	0	0	0	0	0	0
7SK.267	0	0	0	0	0	0
7SK.272	0	0	0	0	0	0
7SK.280	0.49312	0.63669	0.23255	0.15111	0	0.97755
7SK.31	43.918	0	1.7618	7.8787	34.546	32.047
7SK.45	0	0	0	0	0	0
7SK.94	0.50325	0.28238	1.085	1.923	2.3419	1.045
A1BG	7.2092	6.0846	9.4459	7.8567	0.18055	2.6334
A1CF	0	0	0	0	0	0
A2M	0.020332	0.046209	0.41335	0.38554	0	2.2195
A2M-AS1	0.04066	0.32859	0.87844	0.68264	0	1.7382
A2ML1	0	0.015402	0	0.010422	0.0091088	0.02069
A3GALT2	0	0	0	0.015632	0.87092	0
A4GALT	0.12201	0	0	0	0	0
A4GNT	0	0	0	0.072939	0	0
AAAS	23.681	23.857	21.173	19.123	5.249	30.723
AACS	4.1166	5.0424	5.4359	4.3136	1.0515	9.7592
AACSP1	0	0	0	0	0	0
AADAC	0	0	0	0	0	0
AADACL2	0	0	0	0	0	0
AADACL2-AS1	0.33045	0.36969	0.28931	0.28657	0.79659	0.50183
AADACL3	0	0	0	0	0	0
AADACL4	0	0	0	0	0	0
AADACP1	0	0	0	0	0	0
AADAT	0	0	0	0	0	0.062082
AAED1	13.399	11.013	20.576	25.031	3.2394	23.76
AAGAB	12.606	12.698	13.015	15.163	7.9545	22.537
AAK1	1.413	30.771	31.498	8.3485	5.1407	45.361
AAMDC	5.5306	10.14	7.3055	11.683	6.394	11.055
AAMP	48.98	40.443	43.418	75.942	12.501	74.038
AANAT	2.9996	0.15404	0.23249	0.72947	0.96654	0.96721
AAR2	12.52	16.979	21.547	17.236	1.1261	28.033
AARD	0.32541	0.18484	0.24803	0.20843	0.29737	0.91575
AARS	17.599	14.432	11.027	9.1719	0.2232	17.512
AARS2	9.6487	8.4977	9.7028	4.877	0.66911	12.564
AARSP1	0	0	0	0	0	0
AASDH	8.0223	8.41	7.9989	4.7519	1.361	10.633
AASDHPPT	12.973	12.902	12.525	12.65	5.4927	20.138
AASS	6.6597	3.3218	3.25	1.1879	2.0605	5.255
AATBC	0.24401	0.18998	0.25318	27.487	0.047803	0.77114
AATF	29.743	39.916	34.754	38.967	41.754	44.849
AATK	0.122	0.11295	0.13432	8.6376	112.13	7.5266
AATK-AS1	0	0	0	0	0	0
AB015752.1	0	0	0	0	0	0
AB015752.3	0	0	0	0	0	0
AB019437.11	0	0	0	0	0	0
AB019437.30	0	0	0	0	0	0
AB019438.18	0	0	0	0	0	0
AB019438.19	0	0	0	0	0	0
AB019438.20	0.85913	0	0	0	0	0
AB019438.66	0	0	0	0	0	0
AB019439.11	0	0	0	0	0	0
AB019439.12	0.3406	0.1335	0.18084	0	0	0.65183
AB019439.23	0.47784	0.18482	0	0	0	0
AB019439.32	0	0	0	0	0	0
AB019439.5	630.34	0.25159	0.53742	0	0	0
AB019440.1	470.01	0.0051341	0.57353	0	0	0
AB019440.12	0	0	0	0	0	0
AB019440.19	0.32534	0.25673	0.34624	0.26055	0	0.68281
AB019440.22	0	0	0	0	0	0
AB019440.24	0	0	0	0	0	0
AB019440.30	0	0	0	0	0	0
AB019440.4	99.32	3.2243	0.86289	0	0	3.311
AB019440.5	189.74	0	0	0	0	0
AB019441.12	135.81	0.30809	0	0	0	0
AB019441.29	0	0	0	0	0	0
ABAT	5.6422	3.3318	2.9607	9.1291	23.596	6.146
ABC12-47043100G14.2	0	0	0	0	0	0
ABCA1	6.5279	0.92924	0.48044	4.1272	23.241	0.20697
ABCA10	0.85731	0.65726	0.78539	0.26023	0.25491	1.578
ABCA11P	0.78279	0.28237	0.31521	0.062545	0.063727	0.52257
ABCA12	0	0	0	0	0	0
ABCA13	0.07117	0.041077	0.046506	0.28137	0.66988	0.17588
ABCA17P	0.073988	1.0423	0.69226	0	0	0.22246
ABCA2	19.154	54.632	130.55	12.12	57.531	347.71
ABCA3	1.3217	3.1832	3.8443	0.50022	0	7.2185
ABCA4	0	0	0	0	0	0.031036
ABCA5	3.325	4.1433	4.6704	0.54193	1.6255	9.2917
ABCA6	0.30497	0.06161	0.056838	0.34389	0.042487	0.22251
ABCA7	202.74	155.99	132.07	75.295	415.02	166.04
ABCA8	0	0	0	0	0	0
ABCA9	0.32208	0.20536	0.20149	0.4273	0.30802	0.58982
ABCA9-AS1	0	0	0	0	0	0
ABCB1	5.9985	3.6198	13.589	0	0	49.583
ABCB10	9.2406	10.059	8.1282	13.411	1.0416	16.276
ABCB11	0	0	0	0	0.063745	0
ABCB4	30.545	0	0.077511	0.07294	0	0.24829
ABCB5	0.20332	0.20024	0.23253	0.16673	0.45672	0.58465
ABCB6	7.7262	5.5458	4.7637	2.3865	2.8372	4.6867
ABCB7	19.04	12.687	10.628	16.644	1.2324	14.21
ABCB8	25.574	32.533	31.251	16.497	1.2524	48.787
ABCB9	0.94552	1.6226	1.3124	0.2605	0.063722	0.56381
ABCC1	22.041	24.903	21.93	20.082	5.1654	14.725
ABCC10	74.899	72.048	72.698	51.653	39.461	133.74
ABCC11	0.018623	0	0.0155	0.020848	0.021241	0
ABCC12	0	0	0	0	0	0
ABCC13	0	0	0	0	0	0
ABCC2	1.7386	1.4942	1.1316	0.67735	2.5923	1.7025
ABCC3	0.20332	0.13863	0.21185	19.028	0.070264	0.6053
ABCC4	3.2434	3.3529	3.0225	1.5425	0.32924	4.3709
ABCC5	13.767	16.424	17.552	14.122	41.092	27.686
ABCC5-AS1	0	0	0	0	0	0
ABCC6	0.071176	0.01027	0	4.585	1.5509	0.010346
ABCC6P2	0	0	0	0.20841	0	0
ABCC8	0	0	0	0	0	0
ABCC9	11.083	7.5272	9.2011	8.2234	7.4663	15.267
ABCD1	11.478	6.2532	6.5777	27.608	13.785	13.418
ABCD1P2	0	0	0	0	0	0
ABCD1P4	0	0	0	0	0	0
ABCD1P5	0	0	0	0	0	0
ABCD2	1.0066	10.357	10.648	0	0	0.48109
ABCD3	8.9675	11.378	11.404	12.285	1.5719	19.875
ABCD4	65.114	56.609	62.284	29.525	9.0164	89.073
ABCE1	29.225	29.859	31.959	18.558	0.34883	28.282
ABCF1	33.876	31.054	34.99	37.567	13.934	58.266
ABCF2	19.038	19.523	16.635	20.946	1.1896	22.695
ABCF2P1	0	0	0	0	0	0
ABCF2P2	0	0	0	0	0	0
ABCF3	65.975	73.108	91.546	58.295	39.949	134.61
ABCG1	12.595	10.864	9.5389	4.6792	41.595	11.004
ABCG2	0.081052	0.092413	0.26347	0	0	0.6103
ABCG4	0	0	0	0	0	0
ABCG5	0	0	0	0	0	0
ABCG8	0	0	0	0	0	0
ABHD1	0.77269	1.4479	1.5604	0.68804	0.27615	1.5882
ABHD10	21.432	13.959	12.53	10.275	1.8805	18.22
ABHD11	13.856	13.693	15.016	19.697	15.782	26.704
ABHD11-AS1	0.07119	0.19511	0.24798	0.43246	0.47823	0.67243
ABHD12	11.093	14.921	17.542	21.08	1.4975	32.737
ABHD12B	0	0	0	0.938	3.3136	0.067255
ABHD13	12.231	12.082	11.134	11.421	16.504	19.768
ABHD14A	11.122	22.292	21.824	5.5751	0.52038	26.688
ABHD14A-ACY1	4.1179	4.0973	4.6192	3.616	0	5.1164
ABHD14B	67.483	86.016	72.563	34.786	0.26555	56.702
ABHD15	21.4	11.641	17.711	7.7224	0.23365	48.429
ABHD16A	50.983	42.746	54.922	74.864	117.96	97.815
ABHD16B	7.8388	4.4564	5.3583	7.2121	4.5247	8.6433
ABHD17A	72.936	128.61	226.34	75.954	60.898	725.61
ABHD17AP1	0	0	0	0	0	0
ABHD17AP3	1.1438	0	0	0.020842	0	1.6347
ABHD17AP4	0.99124	0	0	0	0	0.34657
ABHD17AP6	2.354	0.22592	0.22221	0	0	12.302
ABHD17B	22.986	10.449	15.62	5.3619	6.9184	30.314
ABHD17C	0.56425	0.92926	2.134	0.75546	0.39828	3.9888
ABHD2	6.7709	8.4608	8.6511	32.648	110.23	42.682
ABHD3	14.655	24.474	21.861	24.622	89.757	28.319
ABHD4	7.0153	5.833	7.7304	10.569	45.001	21.961
ABHD5	3.5258	4.6163	4.9297	35.331	162.11	11.85
ABHD6	3.4869	1.1244	1.6277	4.5753	0.13805	3.7403
ABHD8	4.5657	4.6365	4.5362	13.788	3.9189	7.1503
ABI1	51.261	36.624	37.574	44.554	85.227	65.089
ABI2	9.373	14.812	14.352	4.366	0.47808	16.843
ABI3	7.2395	5.6577	22.561	51.266	7.4238	112.99
ABI3BP	0.081335	0.046214	0.015501	0.041686	0.095584	0.087953
ABL1	22.182	20.848	26.399	22.022	3.2396	40.786
ABL2	5.0647	4.7033	4.6863	2.6467	1.9548	6.0063
ABLIM1	69.422	128.12	96.928	0.12507	1.1896	67.527
ABLIM2	1.3418	1.725	1.2658	0.10422	0	0.8432
ABLIM3	0	0	0	0.072955	0	0.025859
ABO	0	0.051345	0	0.521	0	0.098281
ABR	28.741	27.979	28.707	60.076	80.839	66.935
ABRA	0.050844	0	0	0.020842	0	0.036211
ABRACL	25.353	69.949	52.453	85.442	18.535	52.124
ABT1	21.546	31.111	41.429	18.362	13.265	51.417
ABT1P1	0	0	0	0	0	0
ABTB1	106.78	113.62	110.84	164.03	1805.2	145.99
ABTB2	0.41679	0.29774	0.3204	1.4778	2.1349	0.80192
AC000003.1	0	0	0	0	0	0
AC000029.1	0	0	0	0	0	0
AC000029.2	0	0	0	0	0	0
AC000032.1	0.28467	0.2927	0.16016	0	0	0.68287
AC000035.3	0	0	0	0	0	0
AC000036.4	0	0	0	0	0	0
AC000036.5	0	0	0	0	0	0
AC000041.8	0	0	0	2.1309	0	2.09
AC000067.1	0	0	0	0	0	0
AC000068.5	0.67633	0.44158	0.47019	0.10422	0.13276	0.59995
AC000077.2	0	0	0	0	0	0
AC000078.5	1.5506	1.4787	1.5707	2.2459	0	1.8516
AC000079.1	1.7586	1.0423	1.4157	1.1933	1.5719	2.8505
AC000081.2	0	0	0	0	0	0
AC000082.1	0.13216	0.10784	0.12402	0.12507	0.074353	0.2586
AC000089.3	0	0	0	0	0	0.28454
AC000093.1	0	0	0	0	0	0
AC000093.3	0	0	0	0	0	0
AC000099.1	0	0	0	0	0	0
AC000110.1	0	0	0	0	0	0
AC000111.3	0	0	0	0	0	0
AC000111.4	0	0	0	0	0	0
AC000111.5	0	0	0	0	0	0
AC000111.6	0	0	0	0	0	0
AC000120.7	0.84385	0.7908	0.8939	0.2918	0.19126	1.6243
AC000123.4	3.3496	2.2799	1.7825	1.1463	1.3064	6.571
AC000124.1	0	0	0	0	0	0
AC000362.1	0	0	0	0	0	0
AC000364.1	0	0	0	0	0	0
AC000367.1	0	0	0	0.036474	0	0
AC000370.2	0	0	0	0	0	0
AC000374.1	0	0	0	0	0	0
AC002055.1	6.3234	3.3324	2.8214	3.1058	3.3464	6.9947
AC002056.3	0	0	0	0	0	0
AC002056.5	0	0	0	0	0	0
AC002064.4	0	0	0	0	0	0
AC002064.5	0	0	0	0	0	0
AC002066.1	0	0	0	0	0	0
AC002069.5	0	0	0	0	0	0
AC002069.6	0	0	0	0	0	0
AC002070.1	0	0	0	0	0	0
AC002073.1	0	0	0	0	0	0
AC002073.2	0	0	0	0	0	0
AC002075.3	0	0	0	0	0	0
AC002075.4	0.37618	0.14892	0.25318	0	0	0
AC002076.10	0	0	0	0	0	0
AC002094.1	0	0	0	0	0	0
AC002094.3	0	0	0	0	0	0
AC002094.4	0	0	0	0	0	0
AC002094.5	0	0	0	0	0	0
AC002115.5	0	0	0	0	0	0
AC002115.6	22.807	21.359	20.147	3.241	0.38781	19.605
AC002116.8	7.6203	8.7904	11.12	3.184	1.3701	14.039
AC002117.1	2.6542	4.0561	3.8496	0.73995	1.7683	4.4071
AC002127.2	0	0	0	0	0	0
AC002127.4	0	0	0	0	0	0
AC002303.1	0.48799	0.46206	1.1884	0.19279	0.19662	1.764
AC002310.12	2.7346	2.0025	1.6481	0.62525	0.53668	1.8468
AC002310.2	1.5202	0.83692	0.75955	1.0213	0.44607	0.80177
AC002310.7	0	0	0	0	0	0
AC002314.2	0	0	0	0	0	0
AC002314.3	0	0	0	0	0	0
AC002331.1	0	0	0	0	0	0
AC002347.2	0.096574	0	0	0	0	0
AC002359.1	0	0	0	0	0	0
AC002365.1	0	0	0	0	0	0
AC002366.3	0	0	0	0	0	0
AC002368.4	0	0	0	0	0	0
AC002383.2	0	0	0	0	0	0
AC002386.1	0	0	0	0	0	0
AC002398.9	10.628	11.47	11.261	10.062	31.533	18.097
AC002400.1	1.3014	0.14888	0.36171	0.29181	0	0.49661
AC002401.1	0	0	0	0	0	0
AC002429.4	0	0	0	0	0	0
AC002429.5	0	0	0	0	0	0
AC002450.1	0.33041	0.19508	0.1705	0.35956	0.38766	0.55871
AC002451.3	0	0	0	2.5529	0	0
AC002454.1	0	0	0	0	0	0
AC002456.2	0.74219	0	0	0.27096	3.4891	0
AC002463.2	0	0	0	0	0	0
AC002463.3	0	0	0	0	0	0
AC002465.2	0	0	0	0	0	0
AC002467.5	0	0	0	0	0.84967	0
AC002467.7	0.89956	1.4222	0.89923	2.5324	9.4733	2.9024
AC002470.1	0.12198	0	0.0051675	1.5112	0	0.76048
AC002470.2	0	0	0	0	0	0
AC002472.1	0	0	0	0	0	0
AC002472.11	0	0	0	0	0	0
AC002480.2	0.50333	0	0	0	0	0
AC002480.3	1.5655	0	0	0	0	0
AC002480.4	0.47271	0	0	0	0	0
AC002480.5	7.0969	0	0	0	0	0
AC002485.1	0	0	0	0	0	0
AC002486.2	0	0	0	0	0	0
AC002486.3	0	0	0	0	0	0
AC002511.1	1.037	0.32859	1.0749	0.77108	1.7843	1.7847
AC002511.2	0	0	0	0	4.9122	0
AC002511.3	0	0	0	0	5.2308	0
AC002523.1	0	0	0	0	0	0
AC002539.1	0	0	0	0	0	0
AC002539.2	0	0	0	0	0	0
AC002542.2	0	0	0	0	0	0
AC002543.2	0	0	0	0.10941	0.1912	0.10861
AC002553.4	0	0	0	0	0	0
AC002558.1	0	0	0	0	0	0
AC002558.2	0.79305	0.52372	0.57351	0.26575	0.53129	1.2003
AC002558.3	1.1387	0.79062	0.98179	1.0628	0.89226	2.1622
AC002565.1	0.55917	0.39532	0.43404	0.42727	0.69562	0.88972
AC002978.1	0	0	0	0	0	0
AC002979.1	0	0	0	0	0	0
AC002981.1	0	0	0	0	0	0
AC002992.1	0	0	0	0	0	0
AC002992.4	0	0	0	0	0	0
AC002994.1	0	0	0	0	0	0
AC003002.1	0.89988	0.48259	0.43918	0.17195	0.14342	1.4278
AC003003.5	0.045751	0	0	0	0.053107	0
AC003043.1	0	0	0	0	0	0
AC003043.2	22.484	27.398	31.47	18.315	0.72796	26.212
AC003045.1	0	0	0	0	0	0
AC003071.1	0.15758	0.066743	0.10334	0.23972	0.50449	0.31038
AC003075.4	1.0116	3.4604	3.312	1.7509	0	1.2671
AC003079.1	2.552	1.4273	1.2916	1.3495	1.896	3.3314
AC003080.4	0	0	0	0	0	0
AC003084.2	0	0	0	0	0	0
AC003088.1	0	0	0	0	0	0
AC003090.1	1.0219	0.066742	0.16533	0	0	0
AC003092.1	0	0	0	0	0	0
AC003092.2	0	0	0	0	0	0
AC003099.1	0	0.59046	0	0.32302	0	0
AC003099.2	0	0	0	0	0	0
AC003101.1	0	0	0	0	0	0
AC003102.3	0	0	0	0	0	0
AC003104.1	0.33547	1.222	0.74404	0.3074	3.6276	1.1331
AC003111.1	0	0	0	0	0	0
AC003111.2	0	0	0	0	0	0
AC003658.1	0	0	0	0	0	0
AC003664.1	0	0	0	0	0	0
AC003666.1	0	0	0	0	0	0
AC003681.1	0	0	0	0	0	0
AC003682.1	15.234	11.959	11.652	1.4901	0.75952	14.811
AC003682.2	0.34568	0.3029	0.27906	0.23971	0.37705	0.56903
AC003684.1	0	0	0	0	0	0
AC003684.2	0	0	0	0	0	0
AC003950.1	0	0	0	0	0	0
AC003950.2	0	0	0	0	0	0
AC003956.1	0	0	0	0	0	0
AC003958.2	0	0	0	0	0	0
AC003958.6	0	0	0	0	0	0
AC003963.1	6.262	3.7175	4.4954	3.757	5.8097	8.2771
AC003967.1	0.076246	0	0	0.062529	0.058414	0
AC003968.1	0	0	0	0	0	0
AC003984.1	0	0	0	0	0	0
AC003985.1	0	0	0	0	0	0
AC003986.5	0	0	0	0	0	0
AC003986.6	0	0	0	0	0	0
AC003986.7	0	0	0	0	0	0
AC003988.1	0	0	0	0	0	0
AC003989.3	0	0	0	0	0	0
AC003989.4	0	0	0	0	0	0
AC003991.3	0	0	0	0	0	0
AC004006.2	0	0	0	0	0	0
AC004009.3	0	0	0	0	0	0
AC004012.1	0	0	0	0	0	0
AC004014.3	0	0	0	0	0	0
AC004016.1	0	0	0	0	0	0
AC004019.10	0	0	0	0	0	0
AC004019.13	0.3609	0.24132	0.26867	0.12506	0.30803	0.37253
AC004022.7	0	0	0	0	0	0
AC004022.8	0	0	0	0	0	0
AC004023.1	0.44738	0.60586	0.57357	0.7191	0.15931	1.4481
AC004034.1	0	0	0	0	0	0
AC004034.2	0	0	0	0	0	0
AC004051.2	0	0	0	0	0	0
AC004052.1	0	0	0	0	0	0
AC004053.1	0.025419	0.030806	0.031002	0.036475	0.047796	0.093128
AC004054.1	0	0	0	0	0	0
AC004057.1	946.83	960.35	714.86	442	83.276	796.42
AC004062.2	0	0	0	0	0	0
AC004063.1	0	0	0	0	0	0
AC004066.2	0	0	0	0	0	0
AC004066.3	0	0	0	0	0	0
AC004069.1	0	0	0	0	0	0
AC004069.2	0.77251	0.16944	0.21702	6.8941	16.514	0.61045
AC004070.1	0	0	0	0	0	0
AC004073.1	0	0	0	0	0	0
AC004074.4	0	0	0	0	0	0
AC004080.12	0	0	0	0	0.12214	0.067237
AC004080.14	0	0	0	0	0	0.10347
AC004080.15	0	0	0	0	0	0
AC004080.16	0	0	0	0	0	0
AC004080.17	0	0	0	0	0	0
AC004080.22	0	0	0	0	0	0
AC004112.1	0	0	0	0	0	0
AC004112.2	0	0	0	0	0	0
AC004112.4	0	0	0	0	0	0
AC004112.5	0	0	0	0	0	0
AC004112.7	0	0	0	0	0	0
AC004128.1	0.17791	0.071884	0.1395	0.13027	0.19119	0.27418
AC004129.7	0	0	0	0	0	0
AC004129.9	0	0	0	0	0	0
AC004134.1	0.12709	0.061607	0.077506	0.083362	0.13275	0.18112
AC004142.1	0	0	0	0	0	0
AC004148.1	7.2956	2.6492	3.4307	1.4642	0.20183	4.7335
AC004159.1	0	0	0	0	0	0
AC004160.4	0	0	0	0	0	0
AC004221.1	2.4607	1.1758	4.3458	6.5129	14.348	6.4252
AC004222.1	0	0	0	0	0	0
AC004223.1	2.1805	2.6183	2.8207	1.4172	1.9012	5.3444
AC004231.2	0	0	0	0	0.13284	0
AC004237.1	0	0	0	0	0	0
AC004240.2	0	0	0	0	0	0
AC004241.1	0.13215	0.14376	0.14982	0.11464	1.949	0.9463
AC004258.1	28.7	37.349	40.657	34.628	2.1569	41.069
AC004381.1	0	0	0	0	0	0
AC004381.2	0	0	0	0	0	0
AC004381.3	0	0	0	0	0	0
AC004381.6	0.081321	0.24131	0.25833	0.33354	0.02124	1.1434
AC004383.1	0	0	0	0	0	0
AC004383.3	0.44231	0	0	0	0	0
AC004386.1	0	0	0	0	0	0
AC004386.2	5.1698	4.4772	3.8338	3.1888	5.2577	8.8673
AC004386.3	0	0	0	0	0	0
AC004386.4	0	0	0	0	0	0
AC004447.1	30.943	24.665	29.267	19.056	5.8471	67.401
AC004448.1	0.17794	0.32862	0.27385	0.25532	0	0.18623
AC004448.2	0	0	0	0	0	0
AC004448.5	0	0	0	0	0	0
AC004448.6	0	0	0	0	0	0
AC004449.1	2.0788	3.5483	3.5393	2.0634	2.018	5.8514
AC004453.8	0.64569	0.36971	0.47532	0	0	0
AC004458.1	0	0	0	0	0	0
AC004460.1	0	0	0	0	0	0
AC004460.2	0	0	0	0	0	0
AC004461.4	0.97605	0.88834	1.0953	1.0579	1.3647	2.2298
AC004471.1	0	0	0	0	0	0
AC004471.9	0.24401	0	0.38754	0.22408	0.91385	0.58468
AC004485.3	0	0	0	0	0	0
AC004490.1	0.11693	0.046211	0.0775	0.088583	0.063735	0.25351
AC004492.1	0	0	0	0	0	0
AC004510.1	0.081335	0.041083	0.082668	0	0	0.18618
AC004510.2	0.16267	0.15914	0.22734	0.19799	0	0
AC004522.1	0	0	0	0	0	0
AC004535.2	0	0	0	0	0	0
AC004538.3	0	0	0	0	0	0
AC004540.4	0.42703	0	0	0.86496	2.0339	0
AC004540.5	0.61009	0	0	1.2036	0.23367	0
AC004541.1	0	0	0	0	0	0
AC004543.1	0	0	0	0	0	0
AC004543.2	0	0	0	0	0	0
AC004547.1	0	0	0	0	0	0
AC004549.6	0	0	0	0	0	0
AC004593.3	0	0	0	0	0	0
AC004596.1	12.795	8.7485	9.911	9.1394	11.928	11.826
AC004603.4	0	0	0	0	0	0
AC004668.1	0	0	0	0	0	0
AC004673.1	0	0	0	0	0	0
AC004675.1	0.020333	0	0	0	0.021243	0.54323
AC004691.5	0	0	0	0	0	0
AC004692.4	0	0	0	0	0	0
AC004692.5	0	0	0	0	0	0
AC004699.1	0	0	0	0	0	0
AC004741.4	0	0	0	0	0	0
AC004743.1	1.2556	0.66235	0.81127	0.58363	1.0569	1.9865
AC004744.3	0	0	0	0	0	0
AC004745.1	0	0	0	0	0	0
AC004746.1	0	0	0	0	0	0
AC004754.1	0	0	0	0	0	0
AC004765.1	0.25417	0.41075	0.71305	0.5836	2.995	0.90531
AC004771.1	1.8655	2.4079	2.7691	2.8501	2.2305	3.1143
AC004790.3	0	0	0	0	0	0
AC004815.1	0	0	0.50112	0	0	0.31555
AC004832.1	0.39142	1.2272	1.9632	0	0	0.66735
AC004834.1	0	0	0	0	0	0
AC004837.3	0	0	0	0	0	0
AC004837.4	0	0	0	0	0	0
AC004837.5	0.45754	0.5597	0.84727	0.21363	0	0.49149
AC004840.1	0	0	0	0	0	0
AC004840.2	0	0	0	0	0	0
AC004840.8	0	0	0	0	0	0
AC004840.9	4.3462	3.4918	5.4932	1.3914	0.76471	29.811
AC004841.1	1.7488	1.6173	1.3744	6.1747	5.6151	2.5652
AC004846.1	0.77783	0	0	0.91184	0	0
AC004846.2	3.0957	1.1963	1.1264	3.8296	10.535	2.0487
AC004851.1	0	0	0	0	0	0
AC004854.4	0	0	0	0	0	0
AC004854.5	0	0	0	0	0	0
AC004855.1	0	0	0	0	0	0
AC004862.6	0	0	0	0	0	0
AC004866.1	559.63	1120.5	879.49	839.84	484.14	785.69
AC004866.3	0	0	0	0	0	0
AC004869.2	0	0	0	0	0	0
AC004869.3	0	0	0	0	0	0
AC004869.4	0	0	0	0	0	0
AC004870.3	0	0	0	0	0	0
AC004870.4	0	0	0	0	0	0
AC004870.5	0	0	0	0	0	0
AC004875.1	0	0	0	0	0	0
AC004878.2	0.15248	0.11295	0.11885	0	0.52574	0.59998
AC004878.3	4.4889	4.3127	4.0405	1.5736	1.1418	4.4591
AC004878.5	0.74722	0.94464	0.50117	0.3439	0.36116	1.2002
AC004878.6	0	0	0	0	0	0
AC004878.7	0	0	0	0	0.6001	0
AC004878.8	0	0	0	0	0	0
AC004884.1	0	0	0	0	0	0
AC004889.1	0	0	0	0	0	0
AC004893.10	0.43208	0.20538	0.20152	0.09379	0	0.40351
AC004893.11	3.2583	2.3823	2.6457	1.313	1.6897	4.0033
AC004895.4	0	0	0	0	0	0
AC004898.1	20.978	7.4755	9.7966	10.75	14.042	19.814
AC004898.2	0	0	0	0	0	0
AC004899.3	0	0	0	0	0	0
AC004901.1	0	0	0	0	0	0
AC004906.3	2.2517	1.6481	1.9789	0	0	6.3677
AC004911.2	0	0	0	0	0	0
AC004917.1	3.7572	2.213	2.8318	5.5645	36.804	6.3118
AC004920.2	0	0	0	0	0	0
AC004920.3	0	0	0	0	0	0
AC004923.1	0.10675	0.020538	0.05167	2.4439	0.76475	0.32599
AC004924.1	0	0	0	0	0	0
AC004925.1	0	0	0	0	0	0
AC004932.1	0	0	0	0	0	0
AC004932.2	0	0	0	0	0	0
AC004932.3	0	0	0	0	1.6147	0
AC004932.4	0	0	0	0	0	0
AC004938.5	0	0	0	0	0	0
AC004941.1	0	0	0	0	0	0
AC004941.2	0	0	0	0	0	0
AC004941.3	0.040666	0.051345	0.020666	0.031263	0.079688	0.10347
AC004941.5	0	0	0	0	0	0
AC004945.1	0.040664	0	0.11885	0.041685	0	0.067234
AC004947.2	0	0	0	0	0	0
AC004949.1	0	0	0	0	0	0
AC004951.1	4.9516	6.567	5.4309	6.4345	5.1031	5.93
AC004951.5	0.68621	0.54425	0.48055	0.72954	1.0835	0.45005
AC004951.6	10.039	7.5016	6.3558	4.2517	3.3347	13.347
AC004967.1	0	0	0	0.49501	0	0
AC004967.7	1.8505	1.4634	1.4416	0.35953	0	1.1898
AC004968.2	0.27447	0.19511	0.18604	0.12505	0.22835	0.34136
AC004969.1	0	0	0	0	0	0
AC004969.2	0	0	0	0	0	0
AC004971.1	0	0	0	0	0	0
AC004975.1	0	0	0	0	0	0
AC004979.1	0	0	0	0	0	0
AC004979.2	0	0	0	0	0	0
AC004979.3	0	0	0	0	0	0
AC004979.4	0	0	0	0	0	0
AC004979.5	0	0	0	0	0	0
AC004979.6	0	0	0	0	0	0
AC004979.7	0	0	0	0	0	0
AC004980.1	0	0	0	0	0	0
AC004980.10	0.96077	0.62634	0.70276	0.44811	0	1.6503
AC004980.2	0.50326	0.39529	0.44951	0.31783	0.2602	0.90571
AC004980.7	11.234	11.768	8.7842	4.288	4.4362	10.873
AC004980.8	0	0	0	0	0	0
AC004980.9	5.9897	5.1656	4.2576	2.9856	2.4911	6.7047
AC004985.12	0.5948	0.98079	0.42887	0.34391	0	0.20698
AC004987.10	0	0	0	0	0	0
AC004987.9	0	0	0	0	0	0
AC004988.1	0.35581	0.1643	0.26355	0.18756	0.33991	0.50696
AC005006.1	0	0	0	0	0	0
AC005008.2	0	0	0	0	0	0
AC005008.3	0	0	0	0	0	0
AC005009.1	0	0	0	0	0	0
AC005009.2	0	0	0	0	0	0
AC005013.5	0	0	0	0	0	0
AC005014.5	0.015247	0	0.0051664	0	0	0.010346
AC005017.2	0	0	0	0	0	0
AC005019.2	0	0	0	0	0	0
AC005019.3	0	0	0	0	0	0
AC005020.1	12.571	8.9387	9.2283	8.9163	4.8006	16.529
AC005023.1	0.49827	0.28245	1.4776	0.11464	0.28143	2.2921
AC005027.3	0	0	0	0	0	0
AC005033.6	0	0	0	0	0	0
AC005034.2	0	0	0	0	0	0
AC005035.1	19.227	12.856	9.9109	13.579	37.52	7.3616
AC005035.2	0	0	0	3.715	26.876	0.025864
AC005037.1	0	0	0	0	0	0
AC005037.3	13.298	9.9661	10.237	9.8534	39.159	21.026
AC005037.6	0	0	0	0	0	0
AC005040.1	0	0	0	0	0	0
AC005040.3	0	0	0	0	0	0
AC005041.11	0	0	0	0	0	0
AC005042.2	0	0.15917	0.098171	0.13548	0	0.13451
AC005042.3	0	0	0	0	0	0
AC005042.4	0	0.041083	0.046508	0.020845	0.069038	0.077607
AC005042.5	0	0	0	0	0	0
AC005048.1	0	0	0	0	0	0
AC005060.1	0	0	0	0	0	0
AC005062.2	0.3152	0	0.046507	0	0	0
AC005068.1	0.60493	0.3286	0.91972	0.38557	0.66387	2.1264
AC005071.1	0	0	0	0	0	0
AC005071.2	0	0	0	0	0	0
AC005071.3	3.7209	2.2542	3.606	0.48978	2.0979	6.3413
AC005075.5	0	0	0	0	0	0
AC005076.5	0.75752	1.217	0.62523	2.4855	0.38788	0.69837
AC005077.1	1.1133	0.5699	0.63039	0.88057	1.3807	1.6349
AC005077.14	0.06608	0.041077	0.05684	0	0	0.46036
AC005077.5	0	0	0	0	0	0
AC005077.7	0	0	0	0	0	0
AC005077.8	0	0	0	0	0	0
AC005077.9	0	0	0	0	0	0
AC005082.1	0.76268	0	0	0.31262	0	1.5934
AC005082.12	5.7753	7.3788	7.1096	8.4834	3.4422	9.5033
AC005082.2	5.454	3.5941	4.3349	3.9186	5.8673	12.375
AC005082.3	0	0	0	0	0	0
AC005083.1	2.6686	0.061608	0.50632	0	0	0.75013
AC005086.1	0	0	0	0	0	0
AC005086.2	2.8924	1.3811	2.3873	3.225	3.6007	5.017
AC005086.3	0	0	0	0	0	0
AC005086.4	0	0	0	0	0	0
AC005088.1	0	0	0	0	0	0
AC005094.2	0	0	0	0	0	0
AC005102.1	0	0	0	0	0	0
AC005104.1	0	0	0	0	0	0
AC005104.3	3.3703	2.5517	2.7074	1.4173	1.6569	6.1721
AC005105.2	0	0	0	0.16675	1.4764	0
AC005138.1	0	0	0	0	0	0
AC005150.1	0	0.21051	0	0	0.29741	0.06725
AC005152.1	0	0	0	0	0	0
AC005152.3	0	0	0	0	0	0
AC005154.5	2.5213	1.6022	1.5034	2.5115	0.76478	3.7929
AC005154.6	23.823	18.781	18.106	25.433	17.805	36.584
AC005154.7	6.1248	4.4772	3.8286	5.0646	3.1967	8.382
AC005154.8	1.1944	0.54423	0.40816	1.0005	1.2002	1.4793
AC005154.9	0	0	0	0	0	0
AC005159.1	0	0	0	0	0	0
AC005160.3	0	0	0	0	0	0
AC005161.1	0	0	0	0	0	0
AC005162.3	0	0	0	0	0	0
AC005162.4	0	0	0	0	0	0
AC005162.5	0	0	0	0	0	0
AC005178.1	0	0	0	0	0	0
AC005181.1	0	0	0	0	0	0
AC005187.1	0	0	0	0	0	0
AC005189.1	3.9852	2.0075	3.2397	0.69824	2.4058	4.739
AC005189.6	0	0	0	0	0	0
AC005197.1	3.4009	4.3746	4.9392	4.1213	2.4805	5.1837
AC005197.2	0	0	0	0	0	0
AC005197.3	0	0	0	0	0	0
AC005197.4	9.3625	10.042	12.143	9.2595	10.291	17.063
AC005208.1	0	0	0	0	0	0
AC005215.1	0	0	0	0	0	0
AC005220.3	0.13216	0	0	0.22405	1.1684	0
AC005224.1	0	0	0	0	0	0
AC005224.2	0.71673	0.51338	0.50117	0.20842	0	0.812
AC005225.1	0	0	0	0	0	0
AC005229.5	0	0	0	0	0	0
AC005229.7	0	0	0	0	0	0
AC005232.1	0	0	0	0.71381	0	0
AC005235.1	0	0	0	0	0	0
AC005236.1	0	0	0	0	0	0
AC005237.2	0	0	0	0	0	0
AC005237.4	0	0	0	0	0	0
AC005243.1	0	0	0	0	0	0
AC005251.1	0	0	0	0	0	0
AC005251.2	0	0	0	0	0	0
AC005251.3	0	0	0	0	0	0
AC005255.6	0	0	0	0	0	0
AC005271.1	0.071168	0	0.087838	0.062523	0	0.24317
AC005276.1	0.74214	0.92932	0.78547	0.4481	1.3437	2.4677
AC005281.1	0	0	0	0	0	0
AC005281.2	0	0	0	0	0	0
AC005284.1	0	0	0	0	0	0
AC005300.5	0.77279	0.50824	0.82668	0.73984	0	0.50176
AC005301.8	0	0	0	0	0	0
AC005304.1	0	0	0	0	0	0
AC005323.1	0	0	0	0	0	0
AC005324.6	2.2314	0	0	0	0	0
AC005324.7	0	0	0	0	0	0
AC005329.1	0	0	0	0	0	0
AC005329.7	2.2976	3.9795	3.9733	0.94823	0.15932	3.083
AC005332.1	15.209	13.344	13.316	11.125	4.6625	30.277
AC005332.2	0.54392	1.073	1.023	0.58877	0.95583	1.8719
AC005336.1	0	0	0	0	0	0
AC005351.1	0	0	0	0	0	0
AC005355.1	0	0	0	0	0	0
AC005355.2	0	0	0	0	0	0
AC005358.1	0.40166	0.2259	0.33069	0.23969	0.26025	0.65705
AC005358.3	0	0	0	0	0	0
AC005363.9	8.1656	7.4901	12.121	1.9957	1.7478	7.803
AC005370.1	0	0	0	0	0	0
AC005392.13	0	0	0	0	0	0
AC005392.2	0	0	0	0	15.064	0
AC005394.1	0	0	0	0	0	0.19658
AC005394.2	0.055917	0.061615	0.056835	0.031268	0.074361	0.30003
AC005410.1	0	0	0	0	0	0
AC005481.5	0.13724	0.12322	0.05167	0	0	0.036211
AC005484.2	0	0	0	0	0	0
AC005487.2	0	0	0	0	0	0
AC005488.1	33.591	29.356	25.175	2.9282	0.084969	25.396
AC005488.11	2.4705	2.9368	2.4954	1.141	0.19119	3.2221
AC005488.13	3.0445	2.3978	2.6967	0.96915	0.73307	2.9333
AC005493.1	0	0	0	0	0	0
AC005498.1	0.94547	0.2516	0.16535	0.062526	0	0.33629
AC005498.2	0.11186	0	0.35655	0.099011	0	0.098303
AC005512.1	0	0	0	0	0	0
AC005512.2	0	0	0	0	0	0
AC005512.4	1.2962	0.53901	0.86801	0.77115	1.4549	1.4174
AC005513.1	0	0	0	0	0	0
AC005517.1	0.30499	0.18486	0.17567	0.30743	0.31863	0.72952
AC005517.3	0.38638	0.23618	0.248	0.1042	0	1.7069
AC005518.2	0	0	0	0	0	0
AC005522.6	0	0	0	0	0	0
AC005522.7	0	0	0	0	0	0
AC005532.5	0.56427	0.1797	0.51665	0	0.38794	1.0863
AC005534.6	0.24908	0	0	0	0	0
AC005534.8	0.43723	0.41082	0.57359	0.16154	0	0.40868
AC005534.9	3.02	2.3206	3.178	2.23	1.4285	3.0574
AC005537.2	0	0	0	0	0	0
AC005538.5	0	0	0	0	0	0
AC005539.2	0	0	0	0	0	0
AC005540.3	0.89473	0.37993	0.85256	0.42728	0.20724	1.7377
AC005544.1	0	0	0	0	0	0
AC005550.3	0	0	0	0	0	0
AC005550.5	0	0	0	0	0	0
AC005562.1	25.116	10.854	10.831	12.668	5.4451	29.4
AC005586.1	0	0	0	0	0	0
AC005586.2	0.071171	0.030805	0.031001	0.046895	0.084982	0.12416
AC005588.2	0	0	0	0	0	0
AC005592.1	0	0	0	0	0	0
AC005592.2	0	0	0	0	0	0
AC005609.1	0	0	0	0	0	0
AC005609.17	0.096584	0.030808	0.046507	0.031265	0.09028	0.093134
AC005609.2	0	0	0	0	0	0
AC005618.1	0.31521	0.16429	0.17567	0.10422	0.1009	0.45527
AC005626.1	0	0	0	0	0	0
AC005631.1	0	0	0	0	0	0
AC005631.2	0	0	0	0	0	0
AC005632.1	0	0	0	0	0	0
AC005632.2	0.081328	0.082151	0.093017	0.16675	0.079698	0.10347
AC005632.3	0	0	0	0	0	0
AC005632.4	0	0	0.072344	0	0	0
AC005674.1	8.2245	14.269	11.182	3.965	10.78	15.312
AC005682.5	7.4676	4.3285	5.2035	0.44817	0	4.2324
AC005682.6	0.9966	0.54421	0.5529	0	0	0.24826
AC005682.7	0.28973	0	0	0	0	0
AC005682.8	0.14235	0	0	0	0	0
AC005692.1	0	0	0	0	0	0
AC005696.2	34.103	21.34	26.198	25.255	47.145	46.323
AC005697.1	0	0	0	0	0	0
AC005697.2	0.15248	0.14376	0.11884	0	0.1009	0.082772
AC005702.2	1.347	0.99617	1.4777	0.35429	0.61599	1.7379
AC005703.2	0	0	0	0	0	0
AC005703.3	0	0	0	0	0	0
AC005722.4	0	0	0	0	0	0
AC005725.1	0	0	0	0	0	0
AC005726.1	0	0	0	0	0	0
AC005726.2	0	0	0	0	11.409	0
AC005726.3	0	0	0	0	0	0
AC005726.4	0.79292	0.4159	0.47025	0.63049	0.33992	1.8516
AC005726.6	0	0	0	0	0	0
AC005726.7	0	0	0	0	0	0
AC005730.2	0	0	0	0	0	0
AC005740.3	0	0	0	0	0	0.067247
AC005740.4	0	0	0	0	0	0
AC005740.5	0	0	0	0	0	0
AC005741.2	0	0	0	0	0	0
AC005746.1	0	0	0	0	0	0
AC005752.1	0	0	0	0	0	0
AC005752.2	0	0	0	0	0	0
AC005752.3	0.030504	0	0.010333	0.01563	0.06374	0.056907
AC005753.1	0.11692	0.082143	0.12918	0.067734	0.090292	1.6709
AC005754.1	0	0	0	0	0	0
AC005768.1	0.70151	0.25672	0.3307	0.57836	0.27085	1.2103
AC005772.2	0	0	0	0	0	0
AC005779.1	0	0	0	0	0	0
AC005795.1	1.9168	0.59045	0.56323	0.11985	0	0.92081
AC005803.1	0.80327	0.69311	0.91963	0.68781	1.0143	1.464
AC005808.3	0	0.14888	0.27387	0	0	0.64662
AC005822.1	0	0	0.082666	0	0	0.12417
AC005826.1	0	0	0	0	0	0
AC005829.1	0	0	0	0	0	0
AC005831.1	0	0.056481	0.13435	0	0	0.34146
AC005837.1	4.1986	10.008	11.915	2.1467	2.9912	5.8355
AC005838.1	0	0	0	0	0	0
AC005838.2	0	0	0	0	0	0
AC005841.1	1.0928	1.1193	0.98691	0.19798	0	1.1794
AC005863.1	0	0	0	0	0	0
AC005863.2	0	0	0	0	0	0
AC005866.1	0	0	0	0	0	0
AC005879.1	0	0	0	0	0	0
AC005895.3	0	0	0	0	0	0.87431
AC005899.1	0.086418	0.056481	0.062006	0.13028	0.12214	0.16554
AC005908.1	0	0	0	0	0	0
AC005915.1	2.9434	1.7457	1.3228	0	0	2.8817
AC005926.1	0	0	0	0	0	0
AC005940.1	0.57446	0.52884	0.45992	0.30222	0.52573	0.90009
AC005945.1	0.13725	0.14889	0.098169	0.088583	0.13279	0.12413
AC005946.1	0.21346	0.087286	0.082659	0.31264	0.074347	0.22242
AC005971.2	10.463	8.3838	8.6142	2.2405	0.76467	9.8197
AC005971.3	13.393	10.433	9.8526	2.4334	0	11.113
AC006000.5	0	0	0	0	0	0
AC006001.2	0.6303	0.65716	0.74411	1.6049	1.8534	1.5106
AC006002.1	25.361	16.92	17.359	15.74	24.535	34.692
AC006003.3	0	0	0	0	0	0
AC006004.1	0	0	0	0	0	0
AC006007.1	0	0	0	0	0	0
AC006011.4	4.9961	6.6697	6.8313	4.6743	0.28687	5.829
AC006013.1	0	0	0	0	0	0
AC006014.1	18.452	15.143	12.273	2.0583	0.34003	12.051
AC006014.10	0.23382	0	0	0	0	0.11899
AC006014.5	1.2303	0.64172	0.68713	0.43251	0.17523	1.3401
AC006014.7	4.4334	3.3524	4.4019	2.079	1.0252	8.1578
AC006014.8	0.2694	0.32859	0	0.13025	0	0.39316
AC006017.1	0	0	0	0	0	0
AC006019.3	0.30505	0.2208	0.21185	0.10942	0.090313	0.4501
AC006019.4	0	0	0	0	0	0
AC006021.1	0	0	0	0	0	2.3332
AC006022.4	0	0	0	0	0	0
AC006026.1	0	0	0	0	0	0
AC006026.12	0	0	0	0	0	0
AC006026.13	0	0	0	0	0	0
AC006026.9	0	0	0	0	0	0
AC006027.2	1.1998	0.29262	1.2193	1.2662	2.055	0.53286
AC006028.10	0	0	0	0	0	0
AC006028.11	0	0	0	0	0	0
AC006028.9	1.2707	0.18483	0.21188	0.26572	0.18059	0.43975
AC006032.1	0	0	0	0	0	0
AC006033.13	0	0.26697	0.48567	0	0	14.08
AC006033.22	0	0	0.16534	0.41161	0	2.4567
AC006035.1	0	0	0.12399	0	0	0.27929
AC006037.2	0	0	0	0	0	0
AC006038.4	0	0	0	0	0	0
AC006040.1	0	0	0	0	0	0
AC006041.1	0	0	0	0	0	0
AC006042.6	0	0	0	0	0	0
AC006042.7	0.33549	0.16941	0.22216	0	0	0.40355
AC006042.8	1.4897	2.6393	2.1601	0.072947	0.65314	3.7303
AC006050.2	0	0	0	0	0	0
AC006057.1	0.66593	0.42616	0.46502	0.59406	0.78062	0.99331
AC006057.2	0	0.267	0.33066	1.0264	9.4436	2.0286
AC006062.1	0	0	0	0	0	0
AC006065.1	0	0	0	0	0	0
AC006065.2	0	0	0	0	0	0
AC006070.12	0	0	0	0	0	0
AC006076.1	0	0	0	0	0	0
AC006111.1	0	0	0	0	0	0
AC006111.2	0	0	0	0	0	0
AC006115.1	0.010167	0	0	0.03126	0	0
AC006116.1	5.2815	2.757	2.0563	0.19276	0.10623	2.3017
AC006125.1	0.7981	0.63665	0.81653	0.72951	1.195	1.5107
AC006128.1	0.85403	0.74451	0.69235	0.70347	0.79126	1.3968
AC006132.2	1.1691	1.0012	1.5192	0.70346	0	5.07
AC006133.3	0	0	0	0	0	0
AC006144.1	0	0	0	0	0	0
AC006145.4	0	0	0	0	0	0.010346
AC006146.1	0	0	0	0	0	0
AC006150.1	0	0	0	0	0	0
AC006150.2	0	0	0	0	0	0
AC006153.3	0	0	0	0	0	0
AC006156.3	0	0	0	0	0	0
AC006156.4	0	0	0	0	0	0
AC006156.5	0	0	0	0	0	0
AC006156.6	0	0	0	0	0	0
AC006157.2	0	0	0	0	0	0
AC006159.4	0	0	0	0	0	0
AC006159.5	0	0	0	0	0	0
AC006160.1	6.8367	6.6236	5.3693	4.5592	3.9246	9.7599
AC006160.5	0.3558	0.30291	0.21184	0.10942	0.23899	0.23791
AC006160.8	2.3184	1.802	1.5138	0.77638	1.0675	3.0677
AC006195.2	0	0	0.124	0	0	0.40871
AC006196.1	0	0	0	0	0	0
AC006205.1	0	0	0	0	0	0
AC006213.1	0.055912	0.087276	0	0	0	0.10344
AC006213.2	1.9474	0.88816	0.50633	0.33871	0.053101	1.5778
AC006227.1	0	0	0	0	0	0
AC006230.4	0	0	0	0	0	0
AC006262.2	0	0	0	0	0	0
AC006277.2	0.7372	0.43125	0.49089	0.32824	0	1.0035
AC006288.1	0	0	0	0	0	0
AC006296.1	0	0	0	0	0	0
AC006296.2	0	0	0	0	0	0
AC006315.1	0	0	0	0	0	0
AC006322.1	0	0	0	0	0	0
AC006323.1	0	0	0	0	0	0
AC006326.3	0	0	0	0	0	0
AC006326.5	0	0	0	0	0	0
AC006328.1	0	0	0	0	0	0
AC006328.9	0	0	0	0	0	0
AC006335.10	0	0	0	0	0	0
AC006335.11	0	0	0	0	0	0
AC006335.12	0	0	0	0	0	0
AC006335.2	0	0	0	0	0	0
AC006335.6	0	0	0	0	0	0
AC006335.7	0	0	0	0	0	0
AC006355.3	0	0	0	0	0	0
AC006357.1	1.1337	1.0886	1.5244	0.37514	0	2.2814
AC006366.3	0	0	0	0	0	0
AC006367.1	0	0	0	0.19802	0	0
AC006368.1	2869.6	5011.8	4980.1	3984.8	1696.7	1975.6
AC006369.2	0.35078	2.1875	2.0821	0	0	3.4663
AC006369.3	0	0	0	0	0	0
AC006370.2	0	0	0	0	0	0
AC006371.1	0	0	0	0	0	0
AC006372.1	0	0	0	0	0	0
AC006372.2	0	0	0	0	0	0
AC006372.4	0	0	0	0	0.031866	0.031038
AC006372.5	0	0	0	0	0	0
AC006372.6	0	0	0	0	0	0
AC006373.1	0	0	0	0	0	0
AC006377.1	0	0	0	0	0	0
AC006378.2	1.0624	0.59043	0.73375	0.198	0	1.1327
AC006378.3	3.5224	1.5043	1.1111	0.59404	0	2.8556
AC006380.1	0	0	0	0	0	0
AC006380.3	0	0	0	0	0	0
AC006390.4	0	0	0	0	0	0
AC006427.1	5.6573	1.602	1.2865	1.7038	0.60045	1.1847
AC006427.2	0	0	0	0	0	0
AC006435.1	2.2365	1.7973	1.5554	1.1463	1.0515	2.3955
AC006443.1	0.035581	0	0.10333	0.067736	0	0.046553
AC006445.1	0	0	0	0	0	0
AC006445.6	0	0	0	0	0	0
AC006445.7	0	0	0	0	0	0
AC006452.1	0	0	0	0	0	0
AC006455.2	0	0	0	0	0	0
AC006458.3	0	0	0	0	0	0
AC006460.2	0	0	0	0.031263	0.16995	0
AC006461.2	0	0	0	0	0	0
AC006466.1	0.78277	0.35429	0.36681	0.56791	0.77531	0.98809
AC006466.5	0	0	0	0	0	0
AC006480.1	0.68113	0.58532	0.60445	0.26574	0	0.82772
AC006482.1	0	0	0	0	0	0
AC006483.5	0	0	0	0	0	0
AC006483.8	0.1169	0.041077	0.025829	0.57838	0.55227	0.14488
AC006486.1	0.17792	0.12322	0.14468	0.26575	0.21254	0.37247
AC006487.1	0	0	0	0	0	0
AC006499.1	0	0	0	0	0	0
AC006499.2	0	0	0	0	0	0
AC006499.3	0	0	0	0	0	0
AC006499.4	0	0	0	0	0	0
AC006499.5	0	0	0	0	0	0
AC006499.6	0	0	0	0	0	0
AC006499.7	0	0	0	0	0	0
AC006504.1	2.1047	0.96521	0.87847	0.70865	0.57386	1.4744
AC006504.2	2.5468	1.5503	1.5705	1.485	0.28152	2.0329
AC006504.3	0.69133	0.1797	0.217	0.33348	0	0.35178
AC006509.4	0	0	0	0	0	0
AC006509.6	0.48797	0	0	0	0	0
AC006509.7	2.7855	3.4406	2.9504	2.8608	0.82316	3.6368
AC006517.1	0	0	0	0	0	0
AC006534.1	0	0	0	0	0	0
AC006538.1	17.048	10.311	13.843	3.5742	0.68517	12.991
AC006539.2	0.086412	0.3132	0.18084	0	0	0
AC006547.1	0	0	0	0	0	0
AC006547.13	1.5963	1.2064	0.97662	1.2402	2.2621	2.2555
AC006547.14	0.7269	1.0576	0.9352	0.58883	0	2.4007
AC006547.8	0	0	0	0	0	0
AC006548.19	0	0	0	0	0	0
AC006552.1	0	0.041076	0	0	0	0.041385
AC006557.1	0	0	0	0	0	0
AC006559.1	0	0	0	0	0	0
AC006559.2	0	0	0	0	0	0
AC006926.1	0	0	0	0	0	0
AC006927.1	0	0	0	0	0	0
AC006927.2	0	0	0	0	0	0
AC006927.3	0	0	0	0	0	0
AC006927.4	0	0	0	0	0	0
AC006946.12	0.62523	0.41072	0.39266	2.433	7.1638	2.3126
AC006946.15	0	0	0	0.76071	0.62144	0
AC006947.1	0	0	0	0	0	0
AC006960.5	0	0	0	0	0	0
AC006960.7	0	0	0	0.099001	0	0.60522
AC006978.6	26.372	19.198	21.837	18.504	11.135	34.718
AC006987.4	0	0	0	0	0	0
AC006987.5	0	0	0	0	0	0
AC006987.6	0	0	0	0	0	0
AC006988.1	0	0	0	0	0	0
AC006989.2	0	0	0	0	0	0
AC006994.1	0.17283	0	0.093004	0.16151	0.14871	0.23282
AC006994.2	0	0	0	0.041685	0	0
AC006995.1	84.468	5.9098	3.5859	112.6	457.93	2.4887
AC006995.8	3.0445	2.362	2.6967	0.96915	0.73307	2.9333
AC006999.1	0	0	0	0	0	0
AC007000.10	0.4473	0.267	0.04134	0.30223	1.5402	0.86376
AC007000.11	13.501	0	0	0	0	15.121
AC007001.1	0.58467	0	0	0	0	0
AC007001.3	0	0	0	0	0	0
AC007003.1	0	0	0	0	0	0
AC007006.1	0	0	0	0	0	0
AC007009.1	0	0	0	0	0	0
AC007016.3	0	0	0	0	0	0
AC007036.4	0	0.1181	0	0.198	0	0.53809
AC007036.5	0	0	0	0	0	0
AC007036.6	0.055935	0	0	0.20843	0.26563	0
AC007038.7	1.2505	0.9087	0.67686	0.26054	0.27088	3.6569
AC007040.6	0	0	0	0.26575	0	0.24833
AC007040.8	0	0	0	0.83357	0	0
AC007041.1	0	0	0	0	0	0
AC007041.2	0.30497	0.18997	0.26866	0	0	0.13966
AC007050.17	0	0	0	0	0	0
AC007050.18	0	0	0	0	0	0
AC007056.1	0	0	0	0	0	0
AC007064.22	0	0	0	0	0	0
AC007064.24	0	0	0	0	0	0
AC007064.25	0	0	0	0	0	0
AC007064.28	0	0	0	0	0	0
AC007066.1	1.8249	1.4839	1.8186	0.8285	0.86566	3.9524
AC007078.4	0	0	0	0	0	0
AC007091.1	0	0	0	0	0	0
AC007096.1	0	0	0	0	0	0
AC007098.1	0	0	0	0	0	0
AC007099.1	0.39648	0.36454	0.41333	0.32305	0.91358	1.1796
AC007099.2	0	0	0	0	0	0
AC007106.1	0	0	0	0	0	0
AC007126.1	1.2809	0.84203	1.3642	0.77637	0.86027	2.1214
AC007128.1	0	0	0	0	0	0
AC007130.1	0	0.47752	0	0	0	0.69843
AC007130.2	0	0	0	0	0	0
AC007131.1	0	0	0	0	0	0
AC007131.2	0	0	0	0	0	0
AC007131.3	0	0	0	0	0	0
AC007161.5	0	0	0	0	0	0
AC007163.10	0	0	0	0	0	0
AC007163.11	0	0	0	0	0	0
AC007163.3	0	0	0	0.10942	0	0.041389
AC007163.6	0.14234	0.14892	0.25321	0.13548	0	0.62593
AC007163.8	0	0	0	0	0	0
AC007163.9	0	0	0	0	0	0
AC007179.1	0	0	0	0	0	0
AC007179.2	0	0	0	0	0	0
AC007182.6	0	0	0	0.093792	0	0
AC007193.1	0.076245	0.10269	0.12402	0.062526	0	0.18105
AC007216.1	2.5315	0	0	0	0	0
AC007225.1	0	0	0	0	0	0
AC007228.1	0.08134	0.077011	0.07234	0.036473	0	0.14485
AC007237.2	0	0	0	0	0	0
AC007238.1	0	0	0	0	0	0
AC007239.1	0	0	0	0	0	0
AC007241.1	0	0	0	0	0	0
AC007241.2	0	0	0	0	0	0
AC007241.3	0	0	0	0	0	0
AC007242.1	0	0	0	0	0	0
AC007244.1	0	0	0	0	0	0
AC007245.3	0.86417	7.2914	9.829	1.8757	0.14341	16.187
AC007246.3	6.0397	4.5031	4.433	5.5127	1.057	4.6979
AC007248.7	0	0	0	0	0	0.087948
AC007249.3	0.33549	0.10268	0	0	0	0
AC007250.4	0.80821	0.34918	0.40301	0.50018	0.63734	0.57432
AC007251.2	0	0	0	0	0	0
AC007253.1	0	0	0	0	0	0
AC007255.8	0	0	0	0	0	0
AC007256.5	1.1692	1.6278	1.3277	0.19277	0.14869	0.69835
AC007271.3	0	0	0	0	0	0
AC007272.1	0	0	0	0	0	0
AC007272.2	0	0	0	0	0.95074	0
AC007272.3	0	0	0	0	0	0
AC007274.2	0	0	0	0	0	0
AC007274.5	0	0	0	0	0	0
AC007276.1	0	0	0	0	0	0
AC007276.3	0.3304	0	0	0.6565	0	1.0141
AC007276.4	0	0	0	0	0	0
AC007276.6	0	0	0	0	0	0
AC007276.7	0.49309	0.17456	0.13952	0.56276	0	1.4124
AC007277.3	0	0	0	0	0	0
AC007278.2	0	0.11298	1.3332	0	10.421	26.234
AC007278.3	0	0.4621	3.7201	0	25.393	47.391
AC007279.2	0.086427	0	0.092991	0	0	0.22758
AC007282.1	0	0	0	0	0	0
AC007282.2	0	0	0	0	0	0
AC007282.3	0	0	0	0	0	0
AC007282.6	0	0	0	0	0	0
AC007283.1	0	0	0	0	0	0
AC007283.2	0	0	0	0	0	0
AC007283.3	0	0	0	0	0	0
AC007283.4	0	0	0	0	0	0
AC007283.5	12.722	18.016	18.311	23.996	137.55	51.064
AC007284.1	0	0	0	0	0	0
AC007285.1	0	0	0	0	0	0
AC007285.6	0.31524	0.17458	0.21702	0.46381	0	0.90006
AC007285.7	0	0	0.077513	0	0	0
AC007308.6	1.7129	1.5506	1.7877	1.6674	1.3969	4.0561
AC007312.3	0	0	0	0	0	0
AC007314.1	1.7792	1.8432	1.9634	1.0161	0.31862	2.137
AC007317.1	0	0	0	0	0	0
AC007318.5	0	0.020538	0	0	0	0
AC007319.1	0.29495	0.42101	0.27384	0.6461	0.56293	0.92094
AC007320.3	0	0	0	0	0	0
AC007322.1	0	0	0	0	0	0
AC007322.3	0	0	0	0	0	0
AC007322.5	0	0	0	0	0	0
AC007322.7	0	0	0	0	0	0
AC007327.5	0	0	0	0	0	0
AC007327.6	0	0	0	0	0	0
AC007333.1	0	0	0	0	0	0
AC007333.2	0	0	0	0	0	0
AC007339.1	0	0	0	0	0	0
AC007340.1	0	0	0	0	0	0
AC007342.1	0.015251	0.066741	0.10335	11.859	76.913	0.38797
AC007346.1	0	0	0	0	0	0
AC007349.4	0	0	0	0	0	0
AC007349.5	0	0.40046	0.9714	0	0	1.8262
AC007349.7	0	0	0	0	0	0.16555
AC007353.1	0	0	0	0	0	0
AC007353.2	0	0	0	0	0	0
AC007358.1	0	0	0	0	0	0
AC007359.6	0	0	0	0	0	0
AC007362.1	0	0	0	0.29176	0	0
AC007362.3	0	0	0	0	0	0
AC007364.1	0	0	0	0	0	0
AC007365.1	0	0	0	0	0	0
AC007365.2	0	0	0	0	0	0
AC007365.3	0.091481	0	0	0.32302	0.44075	0.28971
AC007365.4	0	0	0	0	0	0
AC007379.1	0	0	0	0	0	0
AC007379.5	0	0	0	0	0	0
AC007381.2	2.5162	0	0	0	0	0
AC007381.3	2.1351	0	0	0	0	0
AC007383.3	9.5165	5.4169	6.0659	4.2887	2.1988	16.83
AC007383.4	1.276	1.0987	0.90431	1.0473	1.5137	1.6814
AC007383.6	0	0	0	0	0	0
AC007384.1	0	0	0	0	0	0.66214
AC007384.2	0	0	0	0	0	0
AC007385.1	0	0	0	0	0	0
AC007386.2	2.9286	0.80608	0.83201	0.68265	0.82845	1.3502
AC007386.3	2.5315	0.2567	0.33587	0	0	0.31032
AC007386.4	3.2176	0.035938	0.10333	0	0	0.10864
AC007387.1	1.845	2.367	2.7901	0.083364	0	3.171
AC007387.2	0	0	0	0	0	0
AC007388.1	0	0	0.14986	0	0	0
AC007389.1	0	0	0	0	0	0
AC007389.2	0	0	0	0	0	0
AC007389.3	5.5965	4.8063	5.1406	4.413	10.037	10.973
AC007390.4	0	0	0	0	0	0
AC007390.6	1.1742	0.77532	1.2143	0.33872	0	1.4899
AC007391.1	0	0	0	0	0	0
AC007391.2	0	0	0	0	0	0
AC007392.3	0	0	0	0	0	0
AC007392.4	0	0	0	0	0	0
AC007394.3	0	0	0	0	0	0
AC007395.3	0	0	0	0	0	0
AC007395.4	0	0	0	0	0	0
AC007401.2	0.42192	0.2567	0.12398	0.53149	0.5471	0.89495
AC007402.1	0	0	0	0	0	0
AC007403.1	0	0	0	0	0	0
AC007403.2	0	0	0	0	0	0
AC007403.3	0	0	0	0	0	0
AC007405.4	0.85393	0.67777	0.69751	0.68261	0.96122	1.5313
AC007405.6	0	0	0	0	0	0.20171
AC007405.8	0	0	0	0	0	0
AC007421.1	0	0	0	0	0	0
AC007422.1	0	0	0	0	0	0
AC007431.2	0	0	0	0	0	0
AC007436.1	0	0	0	0	0	0
AC007436.2	0	0	0	0	0	0.31561
AC007437.1	0	0	0	0	0	0
AC007450.1	0	0	0	0	0	0
AC007461.2	0	0	0	0	0	0
AC007463.2	0	0	0	0	0	0
AC007465.1	0	0	0	0	0	0
AC007486.1	0	0	0	0	0	0
AC007491.1	0	0	0	0	0	0
AC007493.1	0	0	0	0	0	0
AC007497.1	0	0	0	0	0	0.020692
AC007528.1	0	0	0	0	0	0
AC007535.1	0	0	0	0	0	0
AC007537.2	0	0	0	0	0	0
AC007546.1	0	0.34913	0	0	0	0
AC007547.1	0	0	0	0	0	0
AC007551.1	0	0	0	0	0	0
AC007551.2	0	0	0	0	0	0
AC007556.3	0	0	0	0	0.94006	0
AC007557.1	0	0	0	0	0	0
AC007557.2	0	0	0	0	0	0
AC007557.3	0	0	0	0	0	0
AC007557.4	0	0	0	0	0	0
AC007559.1	0	0	0	0	0	0
AC007560.1	0	0	0	0	0	0
AC007560.2	0	0	0	0	0	0
AC007562.1	0	0	0	0	0	0
AC007563.1	0	0	0	0	0	0
AC007563.3	0	0	0	0	0	0
AC007563.4	0	0	0	0	0	0
AC007563.5	0	0	0	0	0	0
AC007566.10	6.5687	3.7634	3.6427	3.6734	0.38778	12.518
AC007567.1	0	0	0	0	0	0
AC007568.1	0	0	0	0	0	0
AC007595.1	0	0	0	0	0	0
AC007595.2	0	0	0	0	0	0
AC007595.3	0	0	0	0	0	0
AC007595.4	0	0	0	0	0	0
AC007595.5	0	0	0	0	0	0
AC007599.1	7.6573	11.461	12.143	8.6286	3.4479	5.3538
AC007603.1	0.035585	0	0	0	0.058411	0.062082
AC007608.2	0.36091	0.30294	0.22738	0.24492	0.95073	0.48108
AC007610.2	0.76757	0.55965	0.66142	1.1724	0.28681	1.8987
AC007611.1	0	0	0	0	0	0
AC007618.3	4.0465	2.3516	2.961	2.6002	3.5633	6.3628
AC007619.1	1.3167	9.3146	5.6686	0.47419	2.6656	1.8672
AC007620.3	7.218	0.17969	0	16.038	13.603	0.70868
AC007622.1	2.7905	0.48262	0.5374	0.26576	0.22845	0.9725
AC007623.1	4.9463	2.2284	2.3146	1.9434	1.3542	3.4354
AC007623.2	0	0	0	0	0	0
AC007638.1	0.22876	0.17459	0.21185	0.13026	0.19659	0.32594
AC007649.1	0	0	0	0	0	0
AC007652.1	0	0	0.020667	0	0	0.031031
AC007673.1	0	0	0	0	0	0.58442
AC007677.2	0	0	0	0	0	0
AC007677.3	0	0	0	0	0	0
AC007679.1	0	0	0	0	0	0
AC007679.3	0	0	0	0	0	0
AC007679.4	0	0	0	0	0	0
AC007680.2	0	0	0	0	0	0
AC007682.1	0.066085	0.030803	0.046502	0.052104	0.069043	0.067223
AC007682.2	0	0	0	0	0	0
AC007683.1	0	0	0	0	0	0
AC007686.2	6.0998	3.2242	3.4463	3.1263	17.314	8.6617
AC007687.1	0	0	0	0	0	0
AC007690.1	0.42194	0	0.067164	0	0	1.0191
AC007739.1	3.4261	2.1923	2.382	1.5215	1.9754	4.1282
AC007740.1	0	0	0	0	0	0
AC007742.3	0	0	0	0	0	0
AC007742.6	0	0	0	0	0	0
AC007743.1	15.93	11.599	13.34	10.792	16.602	26.102
AC007750.5	0	0	0	0	0	0
AC007773.1	0.22371	0.097562	0.11368	0.16673	0	0.23798
AC007780.1	0	0	0	0	0	0
AC007785.1	0	0	0	0	0	0
AC007785.2	0	0	0	0	0	0
AC007790.1	0	0	0	0	0	0
AC007790.4	1.6928	2.1819	1.5346	0.83901	0	1.0192
AC007834.2	0	0	0	0	0	0
AC007842.1	0	0	0	0	0	0
AC007875.2	1.037	2.177	2.1496	0.32305	0.22325	1.0709
AC007875.3	0.060988	0.23105	0.17052	0	0	0.78645
AC007878.1	2.3638	1.6634	1.793	1.2923	1.7046	3.3676
AC007879.1	0	0	0	0	0	0
AC007879.2	3.8328	0.66755	0.43923	0.92751	3.0694	0
AC007879.3	0.30502	0	0	0	0	0
AC007879.4	0	0	0	0	0	0
AC007879.5	6.3344	0.89856	0.76471	1.1151	3.0862	0.24312
AC007879.6	0	0	0	0	0	0
AC007879.7	1.8404	0.34404	0.2015	1.0212	1.8533	0
AC007880.1	2.3279	0	0	0.03126	0.22324	0
AC007881.1	0	0	0	0	0	0
AC007881.4	0	0	0	0	0	0
AC007883.1	0	0	0	0	0	0
AC007899.3	0.361	0.30295	0.91467	0.35954	0.40897	1.7432
AC007919.18	0	0	0	0	0.73838	0
AC007919.19	0	0	0	0	0	0
AC007922.1	0	0	0	0	0	0
AC007938.1	0	0	0.093004	0	0	0
AC007938.2	0	0.061615	0.098183	0	0	0
AC007952.1	0	0	0	0	0	0
AC007952.2	0.37618	0	0	0	0	0
AC007952.3	0	0	0	0	0	0
AC007952.4	0.4931	0.10781	0.041333	0	0	0
AC007952.5	0	0	0	0	0	0
AC007952.6	1.8352	0.27722	0.11885	0	0	0
AC007956.1	1.1133	1.2682	1.6946	1.0578	4.4378	3.2895
AC007965.12	0	0	0	0	0	0
AC007966.1	0	0	0	0	0	0
AC007967.1	0	0	0	0	0	0
AC007967.2	0	0	0	0	0	0
AC007967.3	0	0	0	0	0	0
AC007967.4	0	0	0	0	0	0
AC007969.4	0	0	0	0	0	0
AC007969.5	0	0	0.23252	0	0	0
AC007991.1	0.26939	0.077013	0.072348	0.062525	0.063728	0.11898
AC008026.2	0.53377	0.57502	0.70274	0.33347	0.48854	0.89498
AC008033.1	0.21856	0.09241	0.08267	0.046896	0.52579	0.43453
AC008038.1	0	0	0	0.10421	0	0
AC008045.1	0	0	0	0	0	0
AC008060.5	0	0	0	0	0	0
AC008060.7	0	0	0	0	0	0
AC008060.8	0	0	0	0	0	0
AC008062.1	0	0	0	3.6994	0	0
AC008063.2	0	1.4069	1.1006	0	0	0
AC008063.3	0	0	0	0	0	0
AC008065.1	0	0	0	0	0	0
AC008067.2	0	0	0	0	0	0
AC008068.1	3.68	1.7301	1.8859	0.59398	0.91344	4.4756
AC008069.1	0	0	0	0	0	0
AC008069.2	0	0	0	0	0	0
AC008072.1	0.53889	0.34399	0.29971	0.26575	0.40358	0.46031
AC008073.2	0.41174	0.25157	0.37718	0.32309	0.54718	0.68802
AC008073.7	0.13219	0	0	0.12505	0.06903	0.077594
AC008073.9	0	0	0	0	0	0
AC008074.3	1.2811	0.52374	0.87315	0.64619	0.81255	1.407
AC008074.4	0	0	0	0	0	0
AC008074.5	0	0	0	0	2.1192	0
AC008079.9	0	0	0	0	0	0
AC008080.1	0	0	0	0	0	0
AC008080.2	0	0	0	0	0	0
AC008085.1	0	0	0	0	0	0
AC008088.3	0	0	0	0.19801	0.069062	0.43459
AC008103.1	0	0	0	0	0	0
AC008105.1	9.3268	14.989	11.695	1.881	3.2506	5.7417
AC008105.2	22.851	33.471	32.867	13.814	38.731	25.293
AC008122.1	0	0	0	0	0	0
AC008122.2	1.1794	0.73931	0.95584	0.2032	0.053112	1.6343
AC008132.13	0.061002	0.097549	0.17052	0.04168	0.053111	0.1552
AC008132.14	0	0	0	0	0	0
AC008132.15	0	0	0	0	0	0
AC008132.2	0	0	0	0	0	0
AC008147.1	0	0	0	0	0	0
AC008147.2	0	0	0	0	0	0
AC008147.3	1.5758	1.2732	1.6431	1.2975	1.6462	3.2487
AC008154.1	0	0	0	0	0	0
AC008154.4	0	0	0	0	0	0
AC008154.5	0	0	0	0	0	0
AC008155.1	0	0	0	0	0	0
AC008155.2	0	0	0	0	0	0
AC008162.1	0	0	0	0	0	0
AC008163.4	0	0	0	0	0	0
AC008166.1	0	0	0	0	0	0
AC008171.1	0	0	0	0	0	0
AC008173.1	0	0	0	0	0	0
AC008175.1	0	0	0	0	0	0
AC008175.10	0	0	0	0	0	0
AC008245.1	0	0	0	0	0	0
AC008264.4	0	0	0	0	0	0
AC008265.2	0	0	0	0	0	0
AC008267.1	0.060993	0	0.056838	0.046893	0	0.072427
AC008267.2	3.6141	2.9833	2.8368	1.7353	1.1419	3.885
AC008268.1	0	0	0	0	0	0
AC008268.2	0.32034	0.23617	0.37716	0	0	0.42945
AC008269.2	0	0	0	0	0	0
AC008271.1	0	0	0	0	0	0
AC008277.1	0	0	0	0	0	0
AC008278.2	0	0	0	0	0	0
AC008278.3	0.427	0.4775	0.47024	0.26574	0.41962	0.67755
AC008280.1	0.21349	0.071885	0.092998	0.041686	0.02124	0.19665
AC008280.3	0	0	0	0	0	0
AC008280.4	1.0421	0.59043	0.66659	0.15113	0.18072	1.0191
AC008280.5	4.0618	2.3619	2.9143	1.1413	1.4664	4.6618
AC008281.1	0	0	0	0	0	0
AC008379.1	0	0.45178	0.5219	0.94833	1.7895	0
AC008379.2	0	0	0	0	0	0
AC008392.1	7.8231	5.0371	3.7613	11.958	50.537	8.6563
AC008393.1	0	0	0	0	0	0
AC008397.1	0	0	0	0	0	0
AC008403.1	0.045754	0.81643	0.7957	0.052107	0.50983	0.020692
AC008410.1	0	0	0	0	0	0
AC008412.1	0	0	0	0	0	0
AC008415.1	0	0	0	0	0	0
AC008427.2	0.11182	0.056484	0.18603	0	0.063721	0
AC008434.1	0	0	0	0	0	0
AC008434.2	0	0	0	0	0	0
AC008440.10	0	0	0	1.4849	0	0
AC008440.5	0	0	0	0	0	0
AC008443.1	0	0	0	0	0	0
AC008449.1	0	0	0	0	0	0
AC008459.1	0	0	0	0	0	0
AC008474.1	0	0	0	0	0	0
AC008481.2	0.26938	0.23619	0.24802	0.18757	0.069053	0.42941
AC008494.1	0	0	0	0	0	0
AC008521.1	0	0	0	0	0	0
AC008537.3	1.6419	0.46214	0.62531	0.81801	0.76461	1.8935
AC008541.1	128.28	343.99	298.77	215.71	80.486	107.53
AC008545.1	0	0	0	0.01563	0	0
AC008555.1	0	0	0	0	0	0
AC008555.2	10.468	7.5876	8.0709	6.5441	9.3681	22.729
AC008555.3	0	0	0	0	0	0
AC008555.4	0.6965	1.8587	1.6225	0	0	4.5784
AC008555.5	0.025418	0.041073	0.010333	0	0	0
AC008560.1	0	0	0	0	0	0
AC008565.1	0	0	0	0	0	0
AC008567.1	1.7385	1.3658	1.2401	0.60446	0.4514	2.2552
AC008567.2	0.83884	0.35938	0.74926	0.4377	0	1.4952
AC008569.1	2.735	1.4787	2.2115	2.4072	3.2073	4.6971
AC008573.1	0	0	0	0	0	0
AC008581.1	0	0	0	0	0	0
AC008592.3	0.66589	1.2322	0.9714	0.2605	0	1.6245
AC008592.4	0	0	0	0	0	0
AC008592.5	0	0	0	0	0	0
AC008592.7	0	0	0	0	0	0
AC008598.1	0	0	0	0	0	0
AC008620.1	0	0	0	0	0	0
AC008625.1	0	0	0	0	0	0
AC008635.1	0	0	0	0	0	0
AC008670.1	0	0	0	0	0	0
AC008670.2	0	0	0	0	0	0
AC008670.3	0	0	0	0	0	0
AC008670.4	0	0	0	0	0	0
AC008670.5	0	0	0	0	0	0
AC008671.1	0	0	0	0	0	0
AC008676.1	3.4564	3.1525	3.9063	0.29178	1.0833	6.8074
AC008686.2	0.50834	0	0.005167	0.55755	0	0.51725
AC008687.1	0	0	0	0	0	0
AC008691.1	0	0	0	0	0	0
AC008694.1	0.70662	0.42106	0.27384	0.10942	0	0.25868
AC008694.2	0	0	0	0	0	0
AC008694.3	0	0	0	0	0	0
AC008695.1	0	0	0	0	0	0
AC008697.1	0.75232	0.051339	0.020671	0	0	0
AC008703.1	0	0	0	0	0	0
AC008706.1	0	0	0	0	0	0
AC008728.1	0	0	0	0	0	0
AC008734.1	0.25923	0	0.051674	0	0	0
AC008734.2	0.15756	0	0	0	0	0
AC008737.1	0	0	0	0	0	0
AC008738.1	0	0	0	1.2609	0	0
AC008738.2	0	0	0	0	0	0
AC008740.1	22.903	10.588	10.282	8.2954	9.6929	32.377
AC008740.2	13.551	6.5209	6.7166	2.9595	2.1136	12.188
AC008740.3	57.824	39.819	43.804	24.788	14.438	55.903
AC008746.10	0	0	0	0	0	0
AC008746.3	0.076275	0	0.22219	0.27615	0	0.83284
AC008746.5	3.2941	2.1	1.7879	0.45326	0	5.3761
AC008746.9	0	0	0	0	0	0
AC008747.1	0	0	0	0	0	0
AC008749.1	2.1808	1.1296	0.63558	0.6514	0.74912	1.3708
AC008751.1	0	0	0	0	0	0
AC008751.3	1.1743	1.4685	1.2555	0.2032	0.053106	1.4589
AC008753.3	0.70146	0.611	1.0953	1.6207	1.8693	0
AC008753.6	0.58976	1.2117	2.0204	5.1223	0.4514	1.9084
AC008759.1	1.5097	1.6584	1.3692	1.1933	0.16463	2.0433
AC008764.2	11.824	9.1909	8.7366	8.7175	2.1614	14.577
AC008781.2	0.010165	0	0	0.031263	0	0.056895
AC008781.7	0	0	0	0	0	0
AC008794.1	0	0	0	0	0	0
AC008806.2	0	0	0	0	0	0
AC008813.1	0	0	0	0	0	0
AC008813.2	0	0	0	0	0	0
AC008829.1	0	0	0	0	0	0
AC008834.1	0	0	0	0	0	0
AC008834.2	0	0	0	0	0	0
AC008836.1	0	0	0	0	0	0
AC008850.3	0	0	0	0	0	0
AC008865.1	0	0	0	0	0	0
AC008865.2	0	0	0	0	0	0
AC008869.1	0	0	0	0	0	0
AC008870.1	2.1451	2.0691	1.7415	1.386	0.72221	3.2032
AC008872.1	0	0	0	0	0	0
AC008888.1	0.066087	0	0.036171	0	0	0.077613
AC008894.1	0.84376	0.56484	0.6666	0.60439	1.4181	1.9708
AC008895.1	0	0	0	0	0	0
AC008915.1	0	0	0	0	0	0
AC008937.2	0.38125	0.39538	0.10849	0.48459	0	0.27937
AC008937.3	0	0	0	0.27093	0	0.17068
AC008940.1	0	0	0	0	0	0
AC008946.1	0	0	0	0	0	0
AC008949.1	0	0	0	0	0	0
AC008962.1	0	0	0	0	0	0
AC008967.1	0	0	0	0	0	0
AC008977.1	0	0	0	0	0	0
AC008984.2	1.22	0.66743	0.73382	5.7053	14.302	2.0744
AC008984.5	0	0	0	0	0	0
AC008984.6	0.36093	0	0	0	0	0
AC008984.7	0	0	0	1.8344	5.0498	0
AC008993.1	62.239	64.215	70.235	35.423	21.279	99.044
AC009002.1	0.36097	0.21051	0.32554	0.26578	0.24963	0.47074
AC009009.1	0	0	0	0	0	0
AC009021.1	0	0	0	0	0	0
AC009028.1	0	0	0	0	0	0
AC009041.1	0	0	0	0	0	0
AC009041.2	0	27.779	22.218	0	0	0
AC009041.3	0.28466	0.26182	0.26352	0.27097	0.03188	0.69327
AC009052.1	1.5553	1.725	1.9378	0.98466	0.31335	3.3787
AC009060.1	4.1424	3.163	3.1985	1.4278	0.037182	3.6729
AC009061.1	0	0	0	0.078159	0.49941	0
AC009065.1	0	0	0	0	0	0
AC009065.2	0	0	0	0	0	0
AC009065.3	4.0774	2.1512	2.8417	2.9752	2.1665	11.475
AC009069.1	0	0	0.0051664	0.0052103	0	0.010347
AC009075.1	0.86923	0.10269	0.10335	0.015632	0	0.15001
AC009086.2	34.654	31.226	33.443	27.401	16.627	50.564
AC009086.3	1.3725	4.6721	6.196	1.1255	0	5.6349
AC009093.1	0.40157	0.27215	0	1.4122	0.36653	1.6716
AC009095.4	1.5352	1.145	1.4004	0.4325	0.56302	2.0533
AC009102.1	0	0	0	0	0	0
AC009108.1	0	0	0	0	0	0
AC009110.1	0	0	0	0	0	0
AC009113.1	0	0.60079	0.041333	0.13548	0	0
AC009113.2	0.59476	0.80085	0.74918	0.40117	0.29756	1.6037
AC009116.1	0	0	0	0	0	0
AC009118.1	0.030503	0.030807	0.046502	0	0	0
AC009119.1	0.49309	0.051338	0.093013	0.31263	0.11683	0.84834
AC009119.2	0	0	0	0	0	0
AC009120.1	0	0	0	0	0	0
AC009120.3	1.6267	0.88833	1.2917	0.37516	0.35049	4.4284
AC009121.1	0	0	0	0	0	0
AC009127.1	5.3376	3.6152	4.2165	2.1519	4.1958	7.6625
AC009133.2	20.899	16.265	11.745	0.53665	1.5983	12.149
AC009133.3	1.6927	1.9355	1.6224	1.2974	1.2537	3.135
AC009158.1	0	0	0	0	0	0
AC009159.1	0	0	0	0	0	0
AC009161.1	0	0	0	0	0	0
AC009171.1	2.3384	2.3619	2.4593	0.7451	0.18054	2.7214
AC009196.1	0	0	0	0	0	0
AC009223.2	0	0	0	0	0	0
AC009226.1	0	0	0	0	0	0
AC009227.2	0.091503	0.077008	0.041331	0.041687	0.058424	0.11381
AC009227.3	0	0	0	0	0	0
AC009228.1	0.89474	0.62127	1.0335	0.21885	0	0
AC009229.5	0	0	0	0	0	0
AC009229.6	0	0	0	0	0	0
AC009234.1	0	0	0	0	0	0
AC009236.2	0	0	0	0	0	0
AC009237.10	0	0	0	0	0	0
AC009237.11	0	0	0	0	0	0
AC009237.13	0	0	0	0	0	0
AC009237.14	0	0	0	0	0	0
AC009237.16	0	0	0	0	0	0
AC009237.17	0	0	0	0	0	0
AC009237.2	0	0	0	0	0	0
AC009237.4	0	0	0	0	0	0
AC009237.5	0	0	0	0	0	0
AC009237.6	0	0	0	0	0	0
AC009237.8	0.60997	0.24646	0.11885	0	0	0.6724
AC009238.6	0	0	0	0	0	0
AC009238.7	0	0	0	0	0	0
AC009238.8	0	0	0	0	0	0
AC009245.3	0	0.11809	0	0.062522	0	0
AC009262.2	0	0	0	0	0	0
AC009263.2	0	0	0	0	0	0
AC009264.1	0	0	0	0	0	0
AC009269.1	0	0	0	0	0	0
AC009274.6	0	0	0	0	0	0
AC009276.4	0	0	0	0	0	0
AC009297.1	0	0	0	0	0	0
AC009299.1	0	0	0	0	0	0
AC009299.2	0.77765	0.77013	0.8576	0.072941	0.29211	0.16035
AC009299.3	3.1267	5.6221	4.8772	0.39598	0.01595	1.0602
AC009299.4	0	0	0	0	0	0
AC009299.5	0	0	0	0	0	0
AC009302.2	0	0	0	0	0	0
AC009303.1	0	0	0	0	0	0
AC009303.3	0.091507	0	0	0	0	0
AC009305.1	0	0	0	0	0	0
AC009310.1	0	0	0	0	0	0
AC009311.2	0	0	0	0	0.095621	0
AC009312.1	0	0	0	0	0	0
AC009313.1	0	0	0	0	0	0
AC009313.2	0	0	0	0	0	0
AC009318.1	1.7029	1.6327	1.4828	0.32307	2.167	1.8164
AC009336.1	0	0	0	0	0	0
AC009358.1	0	0	0	0	0	0
AC009362.2	0	0	0	0	0	0
AC009365.4	0	0	0	0	0	0
AC009402.1	5.8871	4.2095	4.7222	2.8451	5.5285	9.9114
AC009403.2	14.855	10.002	9.9156	10.661	11.616	20.637
AC009404.2	1.8248	1.0989	1.3126	1.1203	0.74881	3.554
AC009410.1	0	0	0	0	0	0
AC009411.1	0	0	0	0	0	0
AC009411.2	0	0	0	0	0	0
AC009413.2	0	0	0	0	0	0
AC009413.3	0	0	0	0	0	0
AC009414.1	0	0	0	0	0	0
AC009464.1	0	0	0	0	0	0
AC009473.1	1.2964	0.56476	0.2842	0	0	1.0603
AC009474.1	0	0	0	0	0	0
AC009474.2	1516.2	1919.9	1651.6	744.72	115.94	815.93
AC009477.7	0	0	0	0	0	0
AC009478.1	0.33549	0	0	0.052105	0	0.26896
AC009480.3	0	0	0	0	0	0
AC009480.4	0	0	0	0	0	0
AC009484.1	0	0	0	0	0	0
AC009487.4	0	0	0	0	0	0
AC009487.5	0	0	0	0	0	0
AC009487.6	0.061011	0.046207	0.067178	0.020844	0.41956	0.093113
AC009494.3	0	0	0	0	0	0
AC009495.1	0	0	0	0	0	0
AC009495.2	3.7261	0.22081	2.3977	1.4383	9.2396	18.645
AC009495.3	0.22369	0.23105	0.04134	0	0	0.53283
AC009495.4	0	0	0	0	0	0.70357
AC009498.1	0	0	0	0	0	0
AC009500.2	0	0	0	0	0	0
AC009501.4	0.53377	0.35431	0.33071	0.14068	0.18066	0.57413
AC009502.1	0	0	0	0	0	0
AC009502.3	0	0	0	0	0	0
AC009502.4	0	0	0	0	0	0
AC009505.1	1.1387	0.68276	0.91962	0	0.43547	0.36215
AC009505.2	5.1857	14.028	8.9296	0.15632	0	0.76577
AC009505.4	0	0	0	0	0	0
AC009506.1	0.22366	0	0.056841	11.53	46.164	0.41904
AC009506.2	0	0	0	0	0	0
AC009508.1	0	0	0	0	0	0
AC009517.2	0	0	0	0	0	0
AC009518.2	0	0	0	0	0	0
AC009518.3	0	0	0	0	0	0
AC009518.4	0	0	0	0	0	0
AC009518.8	0	0	0	0	0	0.13968
AC009520.1	0	0	0	0	0	0
AC009531.2	0	0	0	0	0	0
AC009541.1	0	0	0	0	0	0
AC009542.1	0	0	0	0	0	0
AC009542.2	0.25419	0.14889	0.26353	0.35949	0.53648	0.54839
AC009570.1	8.0204	2.5106	3.2917	4.2467	0	4.6352
AC009677.1	0	0	0	0	0	0
AC009690.1	7.5181	3.8102	4.7693	2.0582	0.37173	8.8016
AC009690.2	0.95574	0.611	0.86802	0.89625	0.91865	1.5317
AC009704.1	0.122	0.087297	0.11367	0.13546	0.14868	0.23279
AC009711.1	0	0	0	0	0	0
AC009712.1	0	0	0	0	0	0
AC009712.2	4.3218	1.7869	2.0722	7.9359	3.1604	2.6799
AC009729.1	0	0	0	0	0	0.51732
AC009779.1	0	0	0	0	0	0
AC009784.1	0	0	0	0	0	0
AC009784.3	0.11184	0.28752	0.37206	0	0	0.95177
AC009784.4	0	0	0	0	0	0
AC009785.1	0	0	0	0.062525	0.12214	0
AC009835.1	0	0	0	0	0	0
AC009878.2	0	0	0	0	0	0
AC009892.10	0.37105	0	0	0	0	0
AC009892.2	0	0	0	0	0	0
AC009892.5	0	0	0	0	0	0
AC009892.9	0	0	0	0	0	0
AC009945.4	0	0	0	0	0	0
AC009947.2	0	0	0	0	0	0
AC009947.4	0	0	0	0	0	0
AC009947.5	0	0	0	0	0	0
AC009948.5	6.8767	7.4553	9.4137	9.2602	0.57909	9.7772
AC009948.7	0.18808	0.087277	0.16017	0	0	0
AC009950.1	0	0	0	0	0	0
AC009950.2	11.025	4.7853	2.8729	2.85	15.799	5.2654
AC009951.1	0	0	0.16536	0.7712	0	0.46039
AC009951.2	2.9591	2.7056	2.9249	3.043	4.3016	5.9541
AC009955.8	0	0	0	0	0	0
AC009960.1	0	0	0	0	0	0
AC009960.2	0	0	0	0	0	0
AC009960.3	0	0	0	0	0	0
AC009960.4	0.081317	0	0	0	0	0
AC009960.5	0	0	0	0	0	0
AC009960.6	0	0	0	0	0	0
AC009960.7	0	0	0	0	0	0
AC009961.2	0	0	0	0	0.16995	0.082769
AC009961.3	2.2013	2.0333	2.0463	2.2354	6.1031	3.6262
AC009961.5	0	0	0	0	0	0
AC009963.3	9.4514	0	0	0	0	0
AC009963.4	0	0	0	0	0	0
AC009963.5	0	0	0	0	0	0
AC009963.6	0	0	0	0	0	0
AC009964.1	0	0	0	0	0	0
AC009965.1	0	0	0	0	0	0
AC009965.2	0	0	0	0	0	0
AC009967.1	0	0	0	0	0	0
AC009967.2	0	0	0	0	0	0
AC009967.3	1.1642	0.7753	0.82681	0.85976	1.0039	1.3913
AC009967.5	0.32024	0.19513	0.24805	0	0	0.47081
AC009969.1	0	0	0	0	0	0
AC009970.1	2.5976	0	0	0	0	0
AC009973.1	0	0	0	0	0	0
AC009987.1	0	0	0	0	0	0
AC009997.1	0	0	0	0	0	0
AC010082.1	11.747	0	0.58394	11.723	1.6892	2.1835
AC010082.2	0	0	0	0	0	0
AC010084.1	0.076255	0.48259	0.34101	0.13547	0.59473	0
AC010086.1	0	0	0	0	0	0
AC010086.2	0	0	0	0	0	0
AC010086.5	0	0	0	0	0	0
AC010087.1	0	0	0	0	0	0
AC010091.1	0	0	0	0	0	0
AC010095.6	0	0	0	0	0	0
AC010095.7	0	0	0	0	0	0
AC010096.1	0	0	0	0	0	0
AC010096.2	0	0	0	0	0	0
AC010105.1	0	0	0	0	0	0
AC010127.3	0.31517	0.26698	0.29972	0.29701	0.99305	0.51231
AC010127.4	0	0	0	0	0	0
AC010132.10	0	0	0	0	0	0
AC010132.11	0	0	0	0	0	0
AC010133.1	0	0	0	0	0	0
AC010136.2	0.5693	0.31318	0.2635	0.52104	0.3983	1.4692
AC010137.2	0	0	0	0	0	0
AC010141.1	0	0	0	0	0	0
AC010141.4	0	0	0	0	0	0
AC010141.6	0	0	0	0	0	0
AC010141.8	0	0	0	0	0	0
AC010145.4	0	0	0	0	0	0
AC010146.1	0	0	0	0	0	0
AC010146.2	0	0	0	0	0	0
AC010148.1	0.122	0.066743	0.061995	0	0	0.20176
AC010149.4	0.25926	0	0	0	0	0
AC010150.1	0	0	0	0	0	0
AC010150.2	0	0	0	0	0	0
AC010153.3	0	0	0	0	0	0
AC010154.2	0	0	0	0	0	0
AC010170.1	0	0	0	0	0	0
AC010173.1	0	0	0	0	0	0
AC010176.1	0	0	0	0	0	0
AC010203.1	0	0	0	0	0	0
AC010207.1	0	0	0	0	0	0
AC010207.2	0	0	0	0	0.60567	0
AC010209.1	0	0	0	0	0	0
AC010223.1	0	0	0	0	0	0
AC010226.4	7.3608	1.8329	3.0125	2.798	1.6837	4.8017
AC010240.2	0.061005	0	0.062008	0.067737	0.047828	0.072424
AC010240.3	0	0	0	0	0	0
AC010243.1	0	0	0	0	0	0
AC010245.1	0	0.13349	0	0	0	0.15519
AC010247.1	17.881	3.8567	2.961	6.8832	0.30274	7.0247
AC010295.1	0	0	0	0	0	0
AC010296.1	0	0	0	0	0	0
AC010297.1	0	0	0	0	0	0
AC010301.1	0	0	0	0	0	0
AC010319.1	0	0	0	0	0	0
AC010323.1	4.8084	2.8086	3.6067	2.7982	3.1541	7.0969
AC010325.2	0	0	0	0	0	0
AC010326.1	5.5721	3.5221	3.4618	2.798	5.1245	6.4873
AC010326.2	7.4112	4.3538	4.2105	3.3243	8.3955	8.9489
AC010326.3	7.2694	4.441	4.9143	3.0638	4.275	9.3889
AC010326.4	1.7386	0.77517	0.83701	0.44811	0.72222	1.6605
AC010326.5	0	0.082134	0.53729	0.3543	0	0.49659
AC010326.6	0	0	0	0	0	0
AC010327.1	0	0	0.031002	0.041683	0	0.056908
AC010327.2	0.16773	0.1181	0.087841	0	0.22305	0.21213
AC010328.1	0	0	0	0	0	0
AC010328.2	1.7233	1.3967	1.3485	1.1723	1.4762	2.9905
AC010329.1	0.62524	0.39026	0.35653	0.0521	0.71693	0.71389
AC010332.1	3.5788	1.4582	1.1935	0.28138	0.27618	2.074
AC010333.1	0.20332	0.82671	0.84738	0.42726	0	0
AC010368.1	0	0	0	0	0	0
AC010376.1	0	0	0	0	0	0
AC010422.1	0	0	0	0	0	0
AC010422.2	0	0	0	0	0	0
AC010441.1	0.020333	0.88817	0.71294	7.8997	6.1395	2.9389
AC010455.1	0	0	0	0	0	0
AC010458.1	0	0	0	0	0	0
AC010468.1	0	0.11808	0	0	0	0
AC010468.2	0	0	0	0	0	0
AC010468.3	0	0	0	0	0	0
AC010487.2	0	0	0	0	0	0
AC010487.3	0	0	0	0	0	0
AC010487.4	0	0	0.056827	0	0	0
AC010491.1	11.46	13.035	13.362	5.1694	6.5374	16.178
AC010492.2	0	0	0	0.52105	2.4588	0.031037
AC010492.4	0	0	0	0	0	0
AC010492.5	0	0	0	0	0	0
AC010506.1	2.7144	1.941	2.713	0.51065	0.46735	9.6741
AC010507.1	3.3095	4.2821	3.6428	30.335	435.47	2.0384
AC010507.2	1.6216	1.4633	2.8004	10.895	95.059	1.6143
AC010518.3	0	0	0	0	0	0
AC010522.1	10.619	10.772	11.152	3.6476	3.3194	13.351
AC010525.1	1.0369	0.89853	0.86823	0.65645	0.5952	0.96199
AC010531.2	0	0	0	0	0	0
AC010536.1	3.9239	7.4139	10.402	1.4955	0.45673	26.225
AC010546.1	0	0	0	0	0	0
AC010547.1	0	0	0	0	0	0
AC010591.1	44.834	71.978	65.77	65.182	23.172	32.066
AC010602.1	0	0	0	0	0	0
AC010602.2	0	0	0	0	0	0
AC010606.5	0	0	0	0	0	0
AC010609.1	0	0	0	0	0	0
AC010609.2	0	0	0	0	0	0
AC010609.3	1.7386	1.7353	1.3124	1.0578	1.471	2.84
AC010615.1	0.43719	0.26696	0.38755	0.17194	0.34519	1.0657
AC010615.2	1.0929	0.60588	0.79044	1.0317	2.7094	2.0071
AC010615.3	0.23888	0.12836	0.10334	0.093787	0.23363	0.43454
AC010616.1	5.6628	15.474	8.5462	0	0	3.7553
AC010616.2	0.65569	0.35426	0.51155	0.47937	0.80726	1.045
AC010623.1	0.5896	0.36448	0.12401	0.2553	0.19118	0.32593
AC010627.1	0.19825	0	0.23767	0.14591	0	0
AC010632.1	0.7777	0.50837	0.44957	0.59395	0.97719	0.82257
AC010643.1	1.0268	0.53908	0.56323	0.69294	0.70103	1.2418
AC010646.1	0	0	0	0	0	0
AC010655.1	0	0	0	0	0	0
AC010674.1	5.007	2.1256	2.5526	0	0	0.57943
AC010677.5	0	0	0	0	0	0
AC010679.2	0.5439	0	0.25833	0	0	0.58979
AC010680.1	0.47273	0.46719	0.2532	0	0	0.062092
AC010723.1	0	0	0	0	0	0
AC010724.1	0	0	0	0	0	0
AC010724.3	5.7547	4.9081	5.8799	0.12506	0.021258	6.4411
AC010724.4	0.94543	1.0936	1.4157	0.010422	0	1.3916
AC010724.5	0.025417	0.066746	0.062015	0	0	0.056902
AC010724.6	0	0	0	0	0	0
AC010724.7	0	0	0	0	0	0
AC010724.8	0	0	0	0	0	0
AC010729.1	0	0	0	0	0	0
AC010729.2	0	0	0	0	0	0
AC010729.3	0	0	0	0	0	0
AC010731.2	0	0	0	0	0	0
AC010731.3	0	0	0	0	0	0
AC010731.4	0	0	0	0	0	0
AC010731.6	0	0	0	0	0	0
AC010733.1	0	0	0	0	0	0
AC010733.2	6.5721	1.1911	1.8497	1.7246	1.9277	6.3005
AC010733.5	11.273	1.8636	2.4491	4.294	2.5969	9.3832
AC010739.1	0	0	0	0	0	0
AC010740.1	0	0	0	0	0	0
AC010744.1	0	0	0	0	0	0
AC010745.1	0	0	0	0	0	0
AC010745.2	0	0	0	0	0	0
AC010745.3	0	0	0	0	0	0
AC010745.4	0	0	0	0	0	0
AC010746.3	0	0	0	0	0.47283	0
AC010754.1	0	0	0	0	0	0
AC010761.1	0	0	0	0	0	0
AC010761.2	0	0	0	0	0	0
AC010761.3	0	0	0	0	0	0
AC010789.1	1.6113	0.51341	0.70272	0.6253	0.45676	1.2728
AC010849.1	0	0	0	0	0	0
AC010853.1	0	0	0	0	0	0
AC010874.1	0	0	0	0	0	0
AC010878.3	0	0	0	0	0.86562	0
AC010880.1	0	0	0	0	0	0
AC010883.5	11.895	3.6761	4.6661	3.1002	4.4286	5.8004
AC010884.1	0	0	0	0	0	0
AC010886.2	0.040666	0.051335	0.025837	0.072938	0.22306	0.11384
AC010887.1	0	0	0	0	0	0
AC010888.1	0	0	0	0	0	0
AC010889.1	0	0	0	0	0	0
AC010890.1	0	0	0	0	0	0
AC010891.2	0	0	0	0	0	0
AC010894.3	0.38126	0.087285	0.31002	1.0891	1.0992	0.37764
AC010894.4	0	0	0	0	0	0
AC010894.5	0	0	0	0	0.34002	0.24831
AC010899.1	0.086423	0.17971	0.53219	0.84414	0	0.57414
AC010900.2	0.14742	0.10781	0.16534	0.067737	0	0.2121
AC010904.1	0	0	0	0	0	0
AC010907.2	0.045767	0.10268	0.098168	0	0	0.16555
AC010907.5	0	0	0	0	0	0
AC010913.1	0.10166	0.0051337	0.031001	0.041687	0	0.020694
AC010928.1	0	0	0	0	0	0
AC010928.2	0	0	0	0	0	0
AC010930.1	0	0	0	0	0	0
AC010967.1	0	0	0	0	0	0
AC010967.2	0	0	0	0	0	0
AC010967.3	0	0	0	0	0	0
AC010969.1	0	0	0	0	0	0.015519
AC010970.1	0	0	0	0	0	0
AC010970.2	630.08	995.1	890.04	877.2	486.48	562.45
AC010971.1	0	0	0	0	0	0
AC010974.3	0	0	0	0	0	0
AC010975.1	0	0	0	0	0	0
AC010975.2	0	0	0	0	0	0
AC010976.1	0.040664	0	0.025832	0.057316	0.053128	0.093124
AC010976.2	0.6252	0.71369	0.55801	0.48979	0.45668	0.95717
AC010980.2	0	0	0	0.46898	0	0
AC010982.2	0	0	0	0	0	0
AC010983.1	0	0	0	0	0	0
AC010987.5	0	0	0	0	0	0
AC010987.6	0	0	0	0	0	0
AC010990.1	0	0	0	0	0.0053101	0
AC010997.1	0	0	0	0.52629	0	0
AC010997.2	0	0	0	0	0	0
AC010999.1	0	0	0	0	0	0
AC010999.2	2.44	1.8743	2.0922	2.3707	1.9274	4.0141
AC011005.1	1.2353	0.6007	0.89394	0.57318	0.63722	1.0968
AC011005.2	0	0	0	0	0	0
AC011037.1	0.05083	0.12323	0.19636	0.10941	0.14341	0.29488
AC011193.1	0	0	0	0	0	0
AC011195.1	0	0	0	0	0	0
AC011196.3	0	0	0	0	0	0
AC011225.1	0	0	0	0	0	0
AC011233.2	0	0	0	0	0	0
AC011239.1	0	0	0	0	0	0
AC011242.5	0	0	0	0	0	0
AC011243.1	0	0	0	0	0	0
AC011247.3	0	1.0422	1.6588	0.63564	0	0
AC011284.3	0	0	0	0	0	0
AC011286.1	0	0	0	0	0	0
AC011288.2	2.9178	2.054	2.134	2.3135	6.3107	3.2175
AC011290.4	0	0	0	0	0	0
AC011290.5	0.75742	1.1655	1.1368	0	0	1.1952
AC011294.3	0.086403	0.10781	0.067163	0.026053	0.058426	0.077604
AC011295.1	0.025417	0.066746	0.062015	0	0	0.056902
AC011295.2	0.94543	1.0936	1.4157	0.010422	0	1.3916
AC011295.3	0	0	0	0	0	0
AC011295.4	0	0.13864	0	0	0	0
AC011295.5	1.6826	1.4428	1.7104	0.041683	0	2.0279
AC011298.2	0	0	0	0	0	0
AC011306.1	0	0	0	0	0	0
AC011317.1	0	0	0	0	0	0
AC011322.1	33.915	50.775	64.067	27.831	8.7636	69.492
AC011330.12	0	0	0	0	0	0
AC011330.5	1.4538	0.71365	0.63044	0.23447	0	1.4536
AC011343.1	0	0	0	0	0	0
AC011347.1	0	0	0	0	0	0
AC011363.1	0	0	0	0	0	0
AC011366.3	0	0	0	0	0	0
AC011374.1	0	0	0	0	0	0
AC011374.2	0	0	0	0	0	0
AC011374.3	0	0	0	0	0	0
AC011383.1	0	0	0	0	0	0
AC011385.1	0	0	0	0.43773	0	0
AC011385.2	1.9416	1.7815	2.1856	2.2977	6.2675	3.9362
AC011388.1	0	0	0	0	0	0
AC011406.2	0	0	0	0	0	0
AC011407.1	0	0	0	0	0	0
AC011431.1	0	0	0	0	0	0
AC011442.1	0.75232	0	0.93527	0.3856	0	0.91042
AC011444.1	0	0	0	0	0	0
AC011447.1	0	0	0	0	0	0
AC011447.2	0.46773	0.092429	0.17051	0.062521	0.24959	0.27424
AC011452.1	0.44227	0.27726	0.30484	0.25533	1.1102	0.73968
AC011453.1	0	0	0	0	0	0
AC011455.1	0	0	0	0	0	0
AC011456.1	0	0	0	0	0	0
AC011456.2	0	0	0	0	0	0
AC011458.1	0.14233	0.16943	0.18083	0.11465	0.1062	0.24829
AC011460.1	1.5046	1.0268	1.3175	0.81274	0.77531	2.7775
AC011465.1	0	0	0	0	0	0
AC011466.1	0.7879	0.67258	0.51667	0.11986	0.38237	0.9364
AC011466.2	1.5249	0.83175	1.1315	1.4278	1.9487	2.3849
AC011467.1	0	0	0	0	0	0
AC011467.3	0	0	0	0	0	0
AC011468.1	0	0	0	0	0	0
AC011468.2	0.98103	0.55972	0.44954	0.27095	0.41952	2.2766
AC011468.3	0.93015	0.49804	0.42367	0.15111	0.090282	1.5934
AC011471.1	0.8692	0.82661	0.64062	0.52627	0.55766	1.1175
AC011475.1	0	0	0	0	0	0
AC011475.2	0	0	0	0	0	0
AC011476.1	4.1481	3.7535	3.942	1.9435	0.71157	6.7544
AC011477.1	2.384	2.6646	2.6094	0.15632	0.10621	1.9605
AC011477.2	0	0	0	0	0	0
AC011477.3	4.5539	3.3219	2.8471	0.60963	0.88149	4.8585
AC011478.1	0	0	0	0	0	0
AC011479.1	6.0603	0.23103	0.95587	0.41682	0	1.0347
AC011484.2	0.040667	0.06161	0.10851	0.072954	0.042484	0.098288
AC011487.1	0	0	0	0	0	0
AC011487.2	0.92008	0.4775	1.8448	0	0	0.86404
AC011489.1	0	0	0	0	0	0
AC011489.2	0.64063	0.35943	0.45466	0.38556	0.54166	1.0551
AC011491.1	0	0	0	0	0	0
AC011496.1	0	0	0	0	0	0
AC011498.2	0	0	0	0	0	0
AC011500.2	0	0	0	0	0	0
AC011503.1	0.4016	0.13349	0.21698	0.093792	0	0.39312
AC011503.2	0	0	0	0	0	0
AC011508.1	0.34058	0.30292	0.3875	0.30219	0.61066	0.833
AC011510.2	0	0	0	0	0	0
AC011515.2	0	0	0	0.73469	0	0
AC011518.1	0	0	0	0	0	0
AC011533.2	0	0.17457	0.20149	0	0	0.031027
AC011537.1	0	0	0	0	0	0
AC011594.1	0	0	0	0	0	0
AC011603.1	0.86916	0.66226	1.297	1.61	1.694	3.6979
AC011625.1	0	0	0	0	0	0
AC011626.1	0	0	0	0	0	0
AC011718.1	0	0	0	0	0	0
AC011718.2	0	0	0	0	0	0
AC011718.3	0	0	0	0	0	0
AC011718.4	0	0	0	0	0	0
AC011718.5	0	0	0	0	0	0
AC011737.2	1.0827	0.65208	1.395	1.3964	0	1.6192
AC011738.1	0	0	0	0	0	0
AC011738.4	0	0	0	0	0	0
AC011742.3	0	0	0	0	0	0
AC011742.5	0	0	0	0	0	0
AC011747.3	0	0	0	0.15111	0.23366	0
AC011747.4	6.5315	4.0561	5.1456	4.5228	7.1647	9.3329
AC011747.6	0	0	0	0	0	0
AC011748.1	0	0	0	0	0	0
AC011752.1	0	0	0	0	0	0
AC011753.5	0	0	0	0	0	0
AC011753.6	0	0	0	0	0	0
AC011754.1	0	0	0	0	0	0
AC011767.1	0	0	0	0	0	0
AC011815.1	1.5556	1.0989	0.80601	0.36994	0.14339	1.4122
AC011816.1	0	0.12835	0.036173	0	0.52048	0.65178
AC011840.1	0	0	0	0	0	0
AC011884.1	0	0	0	0	0	0
AC011893.3	0	0	0	0	0	0
AC011897.2	0	0	0	0	0	0
AC011899.1	0	0	0	0	0	0
AC011899.10	0	0	0	0	0	0
AC011899.9	0.19824	0	0.015501	14.262	6.3042	0.17588
AC011901.2	0	0	0	0	0	0
AC011904.1	0.19316	0.18485	0.19116	0.13026	0.14872	0.30521
AC011912.1	0.24908	0.24131	0.2015	0.093786	0.079655	0.24831
AC011933.2	0	0	0	0	0	0
AC011978.1	0	0	0	0	0	0
AC011994.2	0	0	0	0	0	0
AC011995.1	0	0	0	0	0	0
AC011995.2	0	0	0	0	0	0
AC011995.3	0	0	0	0	0	0
AC011997.1	0	0.1797	0.077507	0	0	0.10864
AC011998.1	0	0	0	0	0	0
AC011998.2	0	0	0	0	0	0
AC011998.4	0	0	0	0	0	0
AC011999.1	0.10674	0.082142	0	0	0	0
AC012005.1	0	0	0	0	0	0
AC012005.2	0	0	0	0	0	0
AC012044.1	5.0782	3.122	2.9916	1.907	0.84439	7.7903
AC012047.1	0	0	0	0	0	0
AC012050.1	0	0	0	0	0	0
AC012065.4	0	0	0	0	0	0
AC012065.5	0.31519	0.34914	0.29972	0	0	0.39321
AC012066.1	0	0	0	0	0	0
AC012074.1	0.46254	1.1604	1.0746	0	0	0.67249
AC012074.2	0.32533	0.81117	0.6769	0	0	0.54304
AC012075.1	0	0	0	0	0	0
AC012075.2	0	0	0	0	0	0
AC012078.2	0	0	0	0	0	0
AC012085.2	0	0	0	0	0	0
AC012119.1	0	0	0	0	0	0
AC012123.1	1.0573	0	0	0	0	0
AC012146.7	11.453	8.1125	8.4377	1.287	0	10.315
AC012150.1	0	0	0	0	0	0
AC012154.1	0	0	0	0	0	0
AC012170.1	13.973	6.048	6.3091	2.1831	0.74344	7.49
AC012170.2	0	0	0	0	0	0.24316
AC012175.1	0	0	0	0	0	0
AC012181.1	0	0	0	0	0	0
AC012184.1	1.7182	1.3503	1.1419	0.90148	0.98264	2.1156
AC012215.1	0	0	0	0	0	0
AC012306.2	0	0	0	0	0	0
AC012307.2	0	0	0	0	0	0
AC012309.1	0.0050828	0.035939	0.27902	0	0	0.37248
AC012309.4	0	0	0	0	0	0
AC012313.1	0	0	0	0	0	0
AC012313.3	0.82861	0.54423	0.42885	0.15631	0	0.51731
AC012313.4	1.8959	1.2426	1.4933	1.6829	1.9596	3.1253
AC012314.1	0	0	0	0	0	0
AC012314.19	0	0	0	3.0899	3.8716	0
AC012314.2	0	0	0	0	0	0
AC012314.20	0	0	0	0.17717	0.86612	0
AC012314.21	0	0	0	0	0.026551	0
AC012314.6	0.31519	0.34911	0.55291	0.41165	0	0.73457
AC012314.8	1.098	0.99622	1.447	0.52113	0.13278	1.9657
AC012318.2	0	0	0	0	0	0
AC012337.1	0.0050837	0	0	0	0	0.031038
AC012354.4	0	0	0	0	0	0
AC012354.6	0	0	0	0	0	0
[truncated: 47,905 more rows]

## Sheet: SupplFile 1B
Supplementary File 1B
Variability associated to the reference profiles, based on the interquartile range from the TPM gene expression
Gene	Bcells	CD4_Tcells	CD8_Tcells	Monocytes	Neutrophils	NKcells
5S_rRNA	0	0	0	0	0	0
5S_rRNA.148	0	0	0	0	0	0
5S_rRNA.17	0	0	0	0	0	0
5S_rRNA.251	0	0	0	0	0	0
5S_rRNA.279	0	0	0	0	0	0
5S_rRNA.341	0	0	0	0	0	0
5S_rRNA.36	0	0	0	0	0	0
5S_rRNA.369	0	0	0	0	0	0
5S_rRNA.377	0	0	0	0	0	0
5S_rRNA.389	0	0	0	0	0	0
5S_rRNA.407	0	0	0	0	0	0
5S_rRNA.430	0	0	0	0	0	0
5S_rRNA.448	0	0	0	0	0	0
5S_rRNA.470	0	0	0	0	0	0
5S_rRNA.473	0	0	0	0	0	0
5S_rRNA.48	0	0	0	0	0	0
5S_rRNA.486	0	0	0	0	0	0
5S_rRNA.61	0	0	0	0	0	0
7SK.13	0	0.13607	0	0	0	0
7SK.139	0	0	0	0	0	0
7SK.160	0	0	0	0	0	0
7SK.176	0	0	0	0	0	0
7SK.208	0	0	0	0	0	0
7SK.234	0	0	0	0	0	0
7SK.258	0	0	0	0	0	0
7SK.267	0	0	0	0	0	0
7SK.272	0	0	0	0	0	0
7SK.280	0.82629	0.97812	0.82157	0.76852	0	2.5894
7SK.31	15.175	0	5.0149	3.7625	28.837	11.415
7SK.45	0	0	0	0	0	0
7SK.94	2.1299	1.6993	2.0228	3.5955	4.4601	3.0319
A1BG	2.4821	1.5344	2.6064	4.3131	0.19114	2.038
A1CF	0	0	0	0	0	0
A2M	0.13106	0.31321	0.5813	0.27094	0	5.8631
A2M-AS1	0.066096	0.41836	0.78024	0.50825	0	1.3181
A2ML1	0.020338	0.023104	0.020665	0.020844	0.031861	0.031038
A3GALT2	0	0	0	0.19023	0.75998	0.13709
A4GALT	0.17286	0	0	0	0	0.069835
A4GNT	0	0	0	0.12506	0	0
AAAS	6.8328	5.0183	4.181	4.3583	3.0947	6.3836
AACS	1.9424	1.0899	1.4858	1.4599	0.94554	3.8742
AACSP1	0	0	0	0	0	0
AADAC	0	0	0	0	0	0
AADACL2	0	0	0	0	0	0
AADACL2-AS1	0.86437	0.54418	0.5012	0.59663	1.1361	0.72434
AADACL3	0	0	0	0	0	0
AADACL4	0	0	0	0	0	0
AADACP1	0	0	0	0	0	0
AADAT	0	0	0	0	0	0.13711
AAED1	4.5927	4.0125	9.4246	10.371	3.9557	14.616
AAGAB	4.873	3.8782	3.85	4.5082	2.7014	5.4372
AAK1	0.74196	4.1699	8.8106	2.5947	2.0633	7.9316
AAMDC	2.0295	3.294	1.834	3.5749	2.9877	3.0731
AAMP	14.907	11.345	9.7629	24.307	6.1789	6.7825
AANAT	1.7485	0.17203	0.27386	0.58691	0.95609	0.50442
AAR2	2.6821	2.6316	5.4006	2.5293	0.51487	10.341
AARD	0.27709	0.14116	0.28161	0.14848	0.51282	0.51763
AARS	8.5546	4.1706	2.9893	6.4489	0.37174	11.384
AARS2	1.9637	1.4437	2.3004	2.1778	0.41414	2.5922
AARSP1	0	0	0	0	0	0
AASDH	2.0237	1.7053	2.6041	2.7718	1.1259	2.2754
AASDHPPT	4.4531	2.4587	2.4002	10.123	1.9412	5.2703
AASS	2.7377	1.0622	1.7345	0.89612	3.0928	2.0696
AATBC	0.29478	0.15664	0.1396	31.156	0.14073	0.49916
AATF	4.8506	8.5811	7.8257	9.9863	14.848	8.3579
AATK	0.192	0.18484	0.12659	6.6779	43.413	2.3219
AATK-AS1	0	0	0	0	0	0
AB015752.1	0	0	0	0	0	0
AB015752.3	0.14491	0	0	0	0	0.085351
AB019437.11	0	0	0	0	0	0
AB019437.30	0	0	0	0	0	0
AB019438.18	0	0	0	0	0	0
AB019438.19	0	0	0	0	0	0
AB019438.20	1.2326	0	0	0	0	0
AB019438.66	0	0	0	0	0	0
AB019439.11	0	0	0	0	0	0
AB019439.12	0.15515	0.16431	0.23252	0	0	1.3529
AB019439.23	1.0092	0.78823	0.087829	0	0	0
AB019439.32	1.0928	0	0	0	0	0
AB019439.5	258.86	1.0603	1.4156	0.085971	0.050445	0.19919
AB019440.1	146.82	0.40815	1.9662	0	0.31352	1.0218
AB019440.12	0	0	0	0	0	0
AB019440.19	0.65841	0.5468	0.42113	0.40385	0.21508	0.78897
AB019440.22	0.74215	0	0	0	0	0
AB019440.24	0	0	0	0	0	0
AB019440.30	0.13727	0.074446	0.043915	0	0	0
AB019440.4	129.17	2.2047	1.0414	0	0	3.123
AB019440.5	168.28	0	0.67691	0	0	0
AB019441.12	113.03	0.66745	0.26867	0	0	0.41114
AB019441.29	0.23637	0.046212	0	0	0	0
ABAT	1.7875	1.1091	0.54755	4.9004	12.424	2.9813
ABC12-47043100G14.2	0	0	0	0	0	0
ABCA1	3.3842	0.52102	0.33073	3.6477	13.493	0.63151
ABCA10	0.53897	0.41584	0.34095	0.32307	0.10655	1.0839
ABCA11P	1.1286	0.2105	0.24548	0.20842	0.19135	0.90032
ABCA12	0	0	0	0	0	0
ABCA13	0.091545	0.053904	0.054265	0.25016	0.57392	0.15002
ABCA17P	0.26714	0.82137	0.61756	0	0	0.37509
ABCA2	6.3277	21.053	68.295	2.9487	21.725	87.613
ABCA3	0.76288	0.7007	1.5423	0.28123	0.021244	1.8633
ABCA4	0	0	0	0	0.011135	0.067256
ABCA5	2.2683	1.097	1.4534	0.52105	1.1491	3.1346
ABCA6	0.3152	0.056492	0.031011	0.29184	0.051665	0.09575
ABCA7	71.614	28.342	23.261	29.371	261.29	37.96
ABCA8	0	0	0	0	0	0
ABCA9	0.26439	0.13602	0.19112	0.42724	0.47165	0.53545
ABCA9-AS1	0	0	0	0	0	0
ABCB1	4.3097	3.0022	6.7226	0.080249	0.021248	14.299
ABCB10	2.4422	3.3193	3.2847	2.6167	0.93112	3.0618
ABCB11	0.030506	0	0	0	0.090005	0
ABCB4	10.571	0.020538	0.15762	0.11464	0	0.6025
ABCB5	0.24391	0.11036	0.20931	0.18759	0.43567	0.36455
ABCB6	2.4932	1.7865	1.3805	1.4366	1.3595	1.6202
ABCB7	6.6627	2.3537	2.6199	7.1684	1.2206	5.7293
ABCB8	7.5925	6.772	8.3946	5.6811	0.86022	6.0342
ABCB9	1.3012	0.85453	0.93758	0.18765	0.1062	0.3286
ABCC1	8.391	5.2824	4.5286	6.1597	3.8771	4.8663
ABCC10	27.599	22.48	16.277	30.45	16.977	25.571
ABCC11	0.040663	0.020539	0.023251	0.041684	0.031879	0.0077592
ABCC12	0	0	0	0	0	0
ABCC13	0	0	0	0	0	0
ABCC2	0.65027	0.43132	0.46506	0.26059	2.0851	0.28707
ABCC3	0.41684	0.38259	0.50632	10.401	0.40356	1.0448
ABCC4	3.0295	0.83206	0.47023	0.95175	0.6697	1.5424
ABCC5	4.5582	4.0756	4.1986	10.054	24.752	3.8304
ABCC5-AS1	0	0	0	0	0	0
ABCC6	0.081321	0.056478	0.030998	3.0558	0.87264	0.062071
ABCC6P2	0	0	0	0.55226	0	0
ABCC8	0.22349	0	0	0	0	0
ABCC9	3.4759	2.1037	2.5222	1.9588	5.4172	1.6097
ABCD1	3.2692	1.4688	2.0816	3.3894	5.3865	4.2376
ABCD1P2	0	0	0	0	0	0
ABCD1P4	0	0	0	0	0	0
ABCD1P5	0.17538	0	0.12143	0.22665	0.18326	0.10087
ABCD2	0.73224	3.1162	2.9236	0.020842	0.021241	0.67474
ABCD3	2.6032	1.893	2.2032	5.2746	1.2665	4.3237
ABCD4	12.885	7.9006	11.872	9.5641	5.1838	15.257
ABCE1	8.4347	7.1388	7.4862	7.5857	0.44639	5.459
ABCF1	8.849	6.0152	7.1125	12.762	5.7919	9.3388
ABCF2	4.2957	8.07	6.445	7.7517	0.924	6.968
ABCF2P1	0	0	0	0	0	0
ABCF2P2	0	0	0	0	0	0
ABCF3	8.5965	9.0856	24.09	11.447	19.419	71.844
ABCG1	5.2234	3.7349	4.0612	2.7202	15.807	3.6894
ABCG2	0.086379	0.10527	0.26095	0	0	0.34392
ABCG4	0	0	0	0	0.03186	0
ABCG5	0	0	0	0	0	0
ABCG8	0	0	0	0	0	0
ABHD1	0.71475	0.73157	0.74165	0.4584	0.44605	0.92871
ABHD10	12.532	3.5143	4.7493	14.733	1.1443	7.4901
ABHD11	4.0054	1.5801	4.2446	7.0291	8.3377	6.8943
ABHD11-AS1	0.31005	0.34148	0.38499	0.50547	0.61405	0.70099
ABHD12	3.1602	2.1459	3.6066	3.3501	0.87107	4.4402
ABHD12B	0.082771	0	0.0051675	0.72953	2.4364	0.24564
ABHD13	4.5314	3.3418	3.465	3.5335	4.2344	7.6215
ABHD14A	5.6043	3.5704	7.3754	1.8445	0.5841	5.0943
ABHD14A-ACY1	1.3115	2.2412	1.2702	1.3813	0	1.511
ABHD14B	15.324	15.081	15.22	7.5414	0.48857	10.805
ABHD15	3.7128	4.0951	10.542	3.1989	0.30799	9.3526
ABHD16A	8.1809	6.2947	16.157	11.33	35.77	25.024
ABHD16B	2.9875	1.6252	1.2581	2.408	1.6021	2.8016
ABHD17A	15.911	19.191	73.593	8.9619	14.278	111.99
ABHD17AP1	0	0.010268	0	0	0	0
ABHD17AP3	1.0701	0.08471	0.10335	0.13807	0	2.5095
ABHD17AP4	2.9099	0	0	0.11983	0	0.54843
ABHD17AP6	3.6885	0.17715	0.21699	0	0	9.3826
ABHD17B	12.612	3.0079	6.2676	3.8408	2.3208	5.7532
ABHD17C	0.50598	0.50584	1.7599	0.34913	0.70158	0.67923
ABHD2	3.1332	3.6137	5.2783	21.726	37.841	15.023
ABHD3	3.7084	6.1169	5.7699	9.9531	38.061	6.5139
ABHD4	3.1236	1.5549	2.2213	2.9424	11.522	5.7152
ABHD5	1.4946	1.2969	1.0054	14.99	49.491	9.0601
ABHD6	5.3932	0.50807	0.52227	3.5746	0.13807	1.7795
ABHD8	1.4632	1.3403	0.91479	2.7897	2.1765	2.3733
ABI1	10.312	3.8742	7.214	12.014	12.942	7.1726
ABI2	2.7348	2.9206	2.3808	1.7097	0.58403	2.3441
ABI3	4.1202	2.8884	16.392	23.402	4.2569	41.465
ABI3BP	0.13218	0.035947	0.051675	0.095875	0.26749	0.15265
ABL1	5.629	2.7962	7.0148	6.596	1.1288	11.321
ABL2	1.5974	0.72476	0.92315	1.1575	0.75469	0.67641
ABLIM1	15.097	33.423	37.024	0.26233	0.90348	19.374
ABLIM2	0.71144	0.40543	0.9277	0.11948	0	0.37257
ABLIM3	0.030507	0.056475	0.023253	0.12003	0	0.15522
ABO	0	0.089868	0.046508	0.58804	0.045507	0.23542
ABR	6.0003	4.2167	11.114	9.5487	24.076	10.999
ABRA	0.061004	0.041076	0.051671	0.052111	0.046179	0.051734
ABRACL	10.759	17.584	12.715	27.82	7.3038	26.759
ABT1	4.1153	5.8501	8.5333	2.9202	3.4445	21.374
ABT1P1	0	0	0	0	0	0
ABTB1	20.867	15.458	16.531	48.699	609.19	50.688
ABTB2	0.42717	0.094902	0.16026	1.2595	1.2293	0.80717
AC000003.1	0	0	0	0	0	0
AC000029.1	0	0	0	0	0	0
AC000029.2	0	0	0	0	0	0
AC000032.1	0.38646	0.23618	0.39523	0.10944	0.25763	0.73976
AC000035.3	0	0	0.22478	0.2397	0	0.35435
AC000036.4	0	0	0	0	0	0
AC000036.5	0	0	0.0025832	0	0	0.015519
AC000041.8	0	0	4.8312	5.8045	2.3284	16.225
AC000067.1	0	0	0	0	0	0
AC000068.5	0.34573	0.27983	0.21689	0.11722	0.17261	0.44759
AC000077.2	0	0	0	0	0	0
AC000078.5	0.71467	0.65749	0.83431	2.3606	0.45146	1.1923
AC000079.1	0.68144	0.61872	0.7596	0.86772	1.3977	1.1819
AC000081.2	0	0	0	0	0	0
AC000082.1	0.15756	0.059041	0.15502	0.16679	0.21778	0.26124
AC000089.3	0.022874	0.11809	0	0.13809	0	0.58727
AC000093.1	0.18304	0	0.085264	0	0	0.28961
AC000093.3	0	0	0	0	0	0
AC000099.1	0	0	0	0	0	0
AC000110.1	0	0	0	0	0	0
AC000111.3	0	0	0	0	0	0
AC000111.4	0	0	0	0	0	0
AC000111.5	0	0	0	0	0	0
AC000111.6	0	0	0	0	0	0
AC000120.7	0.68124	0.4979	0.71064	0.46116	0.30272	0.85865
AC000123.4	2.5883	0.75711	1.7314	2.6734	1.8261	8.9107
AC000124.1	0	0	0	0	0	0
AC000362.1	0	0	0	0	0	0
AC000364.1	0	0	0	0	0	0
AC000367.1	0	0	0.0051664	0.072946	0.015943	0.080181
AC000370.2	0	0	0	0	0	0
AC000374.1	0	0	0	0	0	0
AC002055.1	3.6489	2.4177	1.7566	2.1021	2.0594	4.4698
AC002056.3	0	0.12578	0	0	0	0
AC002056.5	0	0	0	0	0	0
AC002064.4	0	0	0	0	0	0
AC002064.5	0	0	0	0	0	0
AC002066.1	0	0	0	0	0	0
AC002069.5	0	0	0	0	0	0
AC002069.6	0	0	0	0	0	0
AC002070.1	0	0	0	0	0	0
AC002073.1	0	0	0	0	0	0
AC002073.2	0	0	0	0	0	0
AC002075.3	0	0	0	0	0	0
AC002075.4	0.97881	0.6444	0.7441	0.041688	0	0.66732
AC002076.10	0	0	0	0	0	0
AC002094.1	5.3038	5.1779	0	4.1583	7.9349	8.507
AC002094.3	0	0	0	0	0	0
AC002094.4	0	0	0	0	0	0
AC002094.5	0	0	0	0	0	0
AC002115.5	0	0	0	0	0	0
AC002115.6	4.5052	5.3094	4.1696	0.92223	0.27927	3.318
AC002116.8	4.3609	3.378	3.5865	2.2068	2.1479	4.8443
AC002117.1	1.794	3.756	1.7785	1.063	1.3333	3.9389
AC002127.2	0	0	0	0	0	0
AC002127.4	0	0	0	0	0	0
AC002303.1	0.43215	0.39281	1.0695	0.19281	0.20186	0.64913
AC002310.12	1.8426	1.2194	1.0465	0.53675	0.34258	1.6914
AC002310.2	0.68596	0.37978	0.32283	0.49763	0.37698	0.29485
AC002310.7	0	0	0.10593	0	0	0
AC002314.2	0.048295	0.048771	0	0	0	0
AC002314.3	0.096567	0	0	0	0	0
AC002331.1	0	0	0.11108	0	0	0
AC002347.2	0.13216	0	0	0	0	0
AC002359.1	0	0	0	0	0.090283	0
AC002365.1	0	0	0	0	0.60303	0
AC002366.3	0	0	0	0	0	0
AC002368.4	0	0	0	0	0	0
AC002383.2	0	0	0	0	0	0.26899
AC002386.1	0	0	0	0	0	0
AC002398.9	3.1091	2.8963	2.859	2.6611	7.8932	2.5559
AC002400.1	0.46508	0.11299	0.3514	0.19551	0	0.40112
AC002401.1	0	0	0	0	0	0
AC002429.4	0	0	0	0	0	0
AC002429.5	0	0	0	0	0	0
AC002450.1	0.40413	0.16431	0.1628	0.36996	0.37999	0.44256
AC002451.3	0.16011	0	0	2.0581	0	0
AC002454.1	0	0	0	0	0	0
AC002456.2	1.0371	0	0	0.84402	3.2952	0
AC002463.2	0	0	0	0	0	0
AC002463.3	0	0	0	0	0	0
AC002465.2	0	0	0	0	0	0
AC002467.5	0	0	0	0	1.4395	0
AC002467.7	0.68135	0.91141	0.3591	1.303	3.4671	1.2255
AC002470.1	0.13727	0	0.043921	0.97446	0.053123	0.48364
AC002470.2	0	0	0	0	0	0
AC002472.1	0	0	0	0	0	0
AC002472.11	0	0	0.020666	0	0	0
AC002480.2	0.37365	0	0	0	0	0
AC002480.3	2.858	0	0	0	0	0
AC002480.4	1.3647	0	0	0	0	0
AC002480.5	5.1878	0.061604	0	0	0	0
AC002485.1	0	0	0	0	0	0
AC002486.2	0	0	0	0	0	0
AC002486.3	0	0	0	0	0	0
AC002511.1	1.8605	1.4479	1.4209	1.0422	3.1227	1.9681
AC002511.2	0	0	0	0.22143	7.9127	0
AC002511.3	0	0	0	0.16153	6.2018	0
AC002523.1	0	0	0	0	0	0
AC002539.1	0	0	0	0	0	0
AC002539.2	0	0	0	0	0	0
AC002542.2	0	0	0	0	0	0
AC002543.2	0.043217	0.041072	0.033583	0.2267	0.2657	0.13707
AC002553.4	0	0	0	0	0	0
AC002558.1	0	0	0	0	0	0
AC002558.2	0.6229	0.54418	0.27369	0.6331	0.3749	0.83567
AC002558.3	0.27972	0.38503	0.22996	0.35174	0.84032	0.74489
AC002565.1	0.18037	0.15666	0.1758	0.31784	1.1077	0.34897
AC002978.1	0	0	0	0	0	0
AC002979.1	0	0	0	0	0	45.933
AC002981.1	0	0	0	0	0	0
AC002992.1	0	0	0	0	0	0
AC002992.4	0	0	0	0	0	0
AC002994.1	0	0	0	0	0	0
AC003002.1	0.85904	0.32348	0.27905	0.31003	0.14619	0.81469
AC003003.5	0.081338	0.030805	0.043916	0.041683	0.098305	0.04915
AC003043.1	0	0	0	0	0	0
AC003043.2	8.1602	7.5	11.004	9.3402	1.0072	12.377
AC003045.1	0	0	0	0	0	0
AC003071.1	0.11695	0.064192	0.074927	0.2267	0.61602	0.26903
AC003075.4	1.1537	1.5075	1.4928	1.3289	0	1.18
AC003079.1	3.4845	1.4611	1.4546	2.1287	4.0766	3.3935
AC003080.4	0	0	0	0	0.1727	0
AC003084.2	0	0	0	0	0	0
AC003088.1	0	0	0	0	0	0
AC003090.1	1.2206	0.12064	0.22733	0	0	0
AC003092.1	0.1652	0	0	0	0	0
AC003092.2	0	0	0	0	0	0
AC003099.1	0	0.92165	0.75437	1.1229	0	0
AC003099.2	0	0	0	0	0	0
AC003101.1	0	0	0	0	0	0
AC003102.3	0.1703	0.18224	0.16536	0	0	0
AC003104.1	0.32039	0.83978	0.79843	0.41425	3.4021	1.0065
AC003111.1	0	0	0	0	0	0
AC003111.2	0	0	0	0	0	0
AC003658.1	0	0	0	0	0	0
AC003664.1	0	0	0	0	0	0
AC003666.1	0	0	0	0	0	0
AC003681.1	0	0	0	0	0	0
AC003682.1	3.3478	1.7817	2.1356	1.0865	0.57654	5.4718
AC003682.2	0.18561	0.23364	0.13952	0.22144	0.31336	0.33896
AC003684.1	0	0	0	0	0	0
AC003684.2	0.32279	0	0.033589	0	0.56026	0.52761
AC003950.1	0	0	0	0	0	0
AC003950.2	0	0	0	0	0	0
AC003956.1	0	0	0	0	0	0
AC003958.2	0	0	0	0	0	0
AC003958.6	0	0	0	0	0	0
AC003963.1	2.7693	1.8948	1.3104	2.9891	4.3273	2.398
AC003967.1	0.081341	0.0051338	0.04134	0.044295	0.162	0.062071
AC003968.1	0	0	0	0	0	0
AC003984.1	0	0	0	0	0	0
AC003985.1	0	0	0	0	0	0
AC003986.5	0	0	0	0	0	0
AC003986.6	0	0	0	0	0	0
AC003986.7	0	0	0	0	0	0
AC003988.1	0	0	0	0	0	0
AC003989.3	0	0	0	0	0	0
AC003989.4	0	0	0	0	0	0
AC003991.3	0	0	0	0	0.356	0
AC004006.2	0	0	0	0	0	0
AC004009.3	0	0	0	0	0	0
AC004012.1	0	0	0	0	0	0
AC004014.3	0	0	0	0	0	0
AC004016.1	0	0	0	0	0	0
AC004019.10	0	0	0	0	0	0
AC004019.13	0.14239	0.26696	0.2351	0.15113	0.33996	0.2509
AC004022.7	0	0	0	0	0	0
AC004022.8	0	0	0	0	0	0
AC004023.1	0.71948	0.38753	0.38485	0.72955	0.31338	0.92371
AC004034.1	0	0.030803	0	0	0	0
AC004034.2	0	0	0	0	0	0
AC004051.2	0	0	0	0	0	0
AC004052.1	0	0	0	0	0	0
AC004053.1	0.060997	0.051338	0.051679	0.054721	0.074355	0.080201
AC004054.1	0	0	0	0	0	0
AC004057.1	1148.8	1864.3	1682.4	400.27	44.901	640.85
AC004062.2	0	0	0	0	0	0
AC004063.1	0	0	0	0	0	0
AC004066.2	0	0	0	0	0	0
AC004066.3	0	0	0	0	0	0
AC004069.1	0	0	0	0	0.16201	0
AC004069.2	0.58718	0.3312	0.40298	2.967	6.6753	0.93105
AC004070.1	0	0	0	0	0	0
AC004073.1	0	0	0	0	0	0
AC004074.4	0	0	0	0	0	0
AC004080.12	0.022878	0	0	0	0.23911	0.1138
AC004080.14	0.022876	0	0	0	0.021245	0.12933
AC004080.15	0	0	0	0	0	0
AC004080.16	0	0	0	0	0	0
AC004080.17	0	0	0	0	0	0
AC004080.22	0	0	0	0	0	0
AC004112.1	0	0	0	0	0	0
AC004112.2	0	0	0	0	0	0
AC004112.4	0	0	0	0	0	0
AC004112.5	0	0	0	0	0	0
AC004112.7	0	0	0	0	0	0
AC004128.1	0.14996	0.05391	0.080068	0.13028	0.36933	0.20167
AC004129.7	0	0	0	0	0	0
AC004129.9	0	0	0	0	0	0
AC004134.1	0.1042	0.033382	0.067175	0.12765	0.21513	0.16296
AC004142.1	0	0	0	0	0	0
AC004148.1	4.5655	1.0264	1.826	2.0581	0.37441	2.3668
AC004159.1	0	0	0	0	0	0
AC004160.4	0	0	0	0	0	0
AC004221.1	4.2793	2.3593	7.5427	13.105	33.581	11.864
AC004222.1	0	0	0	0	0	0
AC004223.1	1.0217	0.66958	0.65074	0.85992	2.5133	1.3627
AC004231.2	0	0	0	0	0.23366	0
AC004237.1	0	0	0	0	0	0.27935
AC004240.2	0	0	0	0	0	0
AC004241.1	0.1017	0.1335	0.098183	0.088585	1.3826	0.59241
AC004258.1	6.2683	5.9626	10.044	7.0451	1.2081	13.021
AC004381.1	0	0	0	0	0	0
AC004381.2	0	0	0	0	0	0
AC004381.3	0	0	0	0	0	0
AC004381.6	0.073716	0.15151	0.19895	0.18499	0.055762	0.57938
AC004383.1	0	0	0	0	0	0
AC004383.3	0.80563	0	0	0	0	0.88724
AC004386.1	0.488	0	0	0	0	0
AC004386.2	8.2849	1.342	1.5066	8.7175	7.1932	10.061
AC004386.3	0	0	0	0	0	0
AC004386.4	0	0	0	0	0	0
AC004447.1	11.676	9.484	7.5233	11.927	4.6016	16.534
AC004448.1	0.34063	0.29009	0.48313	0.41418	0.28942	0.30518
AC004448.2	0	0	0	0	0	0.33107
AC004448.5	0	0	0	0	0	0
AC004448.6	0	0	0	0	0	0
AC004449.1	1.5377	2.8289	2.0932	1.1745	1.2961	3.5551
AC004453.8	0.84644	0.86764	0.67175	0.43513	0	0.51475
AC004458.1	0	0	0	0	0	0
AC004460.1	0	0	0	0	0	0
AC004460.2	0	0	0	0	0	0
AC004461.4	1.2713	0.49529	0.73359	1.3233	2.2553	1.6247
AC004471.1	0	0	0.031002	0	0	0
AC004471.9	0.46254	0.18484	0.42616	0.32303	0.76205	1.34
AC004485.3	0	0	0	0	0	0
AC004490.1	0.16014	0.059057	0.062018	0.088568	0.18321	0.20689
AC004492.1	0	0	0	0	0	0
AC004510.1	0.12456	0.10526	0.074919	0.085969	0.07434	0.1785
AC004510.2	0.28469	0.35425	0.31259	0.36214	0.25241	0.33365
AC004522.1	0	0	0	0	0	0
AC004535.2	0	0	0	0	0	0
AC004538.3	0.16266	0.069317	0.12143	0	0	0.11899
AC004540.4	0.95583	0	0.20927	0.87023	3.8127	0.41127
AC004540.5	0.44482	0	0	0.73985	0.38786	0
AC004541.1	0	0	0	0	0	0
AC004543.1	0	0	0	0	0	0
AC004543.2	0	0	0	0	0	0
AC004547.1	0	0	0	0	0	0
AC004549.6	0.10422	0.012835	0.010335	0.15633	0.27628	0.29485
AC004593.3	0	0	0	0.072945	0	0.14484
AC004596.1	4.7385	2.3805	3.2631	2.8137	8.7646	2.1108
AC004603.4	0	0	0	0	0	0
AC004668.1	0	0	0	0	0	0
AC004673.1	0	0	0	0	0	0
AC004675.1	0.060991	0.020539	0.038751	0.041684	0.045161	0.50955
AC004691.5	0	0	0	0	0	0
AC004692.4	0	0	0	0	0	0
AC004692.5	0	0	0	0	0	0
AC004699.1	0	0	0	0	0	0
AC004741.4	0	0	0	0	0	0
AC004743.1	0.70444	0.29532	0.48045	0.7373	1.1903	0.56455
AC004744.3	0	0	0	0	0	0
AC004745.1	0	0	0	0	0	0
AC004746.1	0	0	0	0	0	0
AC004754.1	0	0	0	0	0	0
AC004765.1	0.29235	0.4622	0.52962	0.56292	1.5312	0.45777
AC004771.1	0.74996	1.6079	1.6089	1.1959	1.3781	2.0633
AC004790.3	0	0	0	0	0	0
AC004815.1	1.1209	0.37482	1.173	0	0.70624	0.79668
AC004832.1	0.34314	0.96274	1.0776	0.1876	0	0.86156
AC004834.1	0	0	0	0	0	0
AC004837.3	0	0	0	0	0	0
AC004837.4	0	0	0	0	0	0
AC004837.5	0.42458	0.44672	0.71582	0.29178	0.26555	0.60269
AC004840.1	0	0	0	0	0	0
AC004840.2	0	0	0	0	0	0
AC004840.8	0	0	0	0	0	0
AC004840.9	2.6144	1.7479	5.1293	0.79471	0.58155	15.495
AC004841.1	0.66801	0.46212	0.55519	3.0986	3.3663	0.86736
AC004846.1	0.45242	0.012838	0.05942	0.65915	0	0.15004
AC004846.2	0.91801	0.55187	0.81657	3.5276	11.512	1.001
AC004851.1	0	0	0	0	0	0
AC004854.4	0.14489	0	0	0	0	0
AC004854.5	0	0	0	0	0	0
AC004855.1	0	0	0	0	0	0
AC004862.6	0	0	0	0	0	0
AC004866.1	798.12	1078.9	1111.9	2467.4	592.51	1287.4
AC004866.3	0	0	0	0	0	0
AC004869.2	0	0	0	0	0	0
AC004869.3	0	0	0	0	0	0
AC004869.4	0	0	0	0	0	0
AC004870.3	0	0	0	0	0	0
AC004870.4	0	0	0	0	0	0
AC004870.5	0	0	0	0	0	0
AC004875.1	0	0	0	0	0	0
AC004878.2	0.24655	0.31061	0.36948	0.18758	0.73833	0.68277
AC004878.3	1.9748	1.1246	1.7594	0.74758	1.0917	2.014
AC004878.5	1.2783	0.70857	0.57878	0.35949	0.60534	1.4976
AC004878.6	0.31773	0	0	0.080773	0.1727	0.40357
AC004878.7	0	0.55194	0.57869	0	0.79662	0.8795
AC004878.8	0	0.15401	0.5891	0	0.90011	0.69837
AC004884.1	0	0	0	0	0	0
AC004889.1	0	0	0	0	0	0
AC004893.10	0.32295	0.17974	0.23252	0.18755	0.095589	0.54846
AC004893.11	1.4552	0.42343	0.98978	0.80766	0.39634	0.57724
AC004895.4	0.053374	0.17968	0.06716	0	0	0
AC004898.1	8.3998	9.2449	10.284	8.0455	20.644	11.769
AC004898.2	0	0	0	0	0	0
AC004899.3	0	0	0	0	0	0
AC004901.1	0	0	0	0	0	0
AC004906.3	1.0472	1.1479	1.3067	0	0	1.8655
AC004911.2	0	0	0	0	0	0
AC004917.1	2.5755	1.3478	1.3252	4.448	17.427	4.8841
AC004920.2	0	0	0	0	0	0
AC004920.3	0	0	0	0	0	0
AC004923.1	0.071182	0.051345	0.072345	0.67711	0.43042	0.13973
AC004924.1	0	0	0	0	0	0
AC004925.1	0	0	0	0	0	0
AC004932.1	0	0	0	0	0	0
AC004932.2	0	0	0	0	0	0
AC004932.3	0	0	0	0.66429	2.1672	1.4508
AC004932.4	0	0	0	0	0	0
AC004938.5	0	0	0	0	0	0
AC004941.1	0	0	0	0	0	0
AC004941.2	0	0	0	0	0	0
AC004941.3	0.025433	0.035951	0.04134	0.062521	0.098252	0.072424
AC004941.5	0	0	0	0	0	0
AC004945.1	0.060996	0.053913	0.18597	0.072947	0.084971	0.072426
AC004947.2	0	0	0	0	0	0
AC004949.1	0	0	0	0	0	0
AC004951.1	2.417	2.0068	2.2396	2.3025	2.4762	3.7011
AC004951.5	0.61264	0.75992	0.35915	0.49254	1.211	0.80721
AC004951.6	6.6452	4.0217	3.0367	7.0107	2.2931	7.6809
AC004967.1	0.1296	0.23105	0.80351	1.5474	2.7216	1.4331
AC004967.7	0.97807	1.3864	1.3974	0.44032	0	1.4723
AC004968.2	0.17026	0.097551	0.087857	0.15634	0.28159	0.23019
AC004969.1	0	0	0	0	0	0
AC004969.2	0	0	0	0	0	0
AC004971.1	0	0	0	0	0	0
AC004975.1	0	0	0	0	0	0
AC004979.1	0	0	0	0	0	0
AC004979.2	0	0	0	0	0	0
AC004979.3	0	0	0	0	0	0
AC004979.4	0	0	0	0	0	0
AC004979.5	0	0	0	0	0	0
AC004979.6	0	0	0	0	0	0
AC004979.7	0	0	0	0	0	0
AC004980.1	0	0	0	0	0	0
AC004980.10	0.98602	0.83699	0.86813	0.54973	0.33741	1.0398
AC004980.2	0.41944	0.31064	0.31778	0.40387	0.45669	0.80706
AC004980.7	3.8641	6.6236	3.6276	3.626	3.0179	7.9407
AC004980.8	0	0	0	0	0	0
AC004980.9	2.4159	1.8817	3.1337	2.7121	1.797	3.081
AC004985.12	0.25678	0.93437	0.39272	0.31271	0	0.3363
AC004987.10	0	0	0	0	0	0
AC004987.9	0	0	0	0	0	0.11383
AC004988.1	0.26183	0.097534	0.26605	0.28661	0.47287	0.28971
AC005006.1	0	0	0	0	0	0
AC005008.2	0	0	0	0	0	0
AC005008.3	0	0	0	0	0	0
AC005009.1	0	0	0	0	0	0
AC005009.2	0.15505	0.12578	0.17826	0	0	0.1733
AC005013.5	0	0	0	0	0	0
AC005014.5	0.040669	0.020538	0.031001	0.0026053	0	0.04138
AC005017.2	0	0	0	0	0	0
AC005019.2	0	0	0	0	0	0
AC005019.3	0	0	0	0	0	0
AC005020.1	6.7336	2.1028	3.4846	3.3935	3.4476	7.8386
AC005023.1	0.48034	0.18485	0.90211	0.23447	0.3771	2.5712
AC005027.3	0	0	0	0	0	0
AC005033.6	0	0	0	0	0	0
AC005034.2	0	0	0	0	0	0
AC005035.1	4.3249	2.239	2.7395	4.4956	7.9154	1.8451
AC005035.2	0	0	0.0051671	6.5183	20.276	0.062077
AC005037.1	0	0	0	0	0	0
AC005037.3	6.0864	3.185	5.2412	7.2535	17.172	7.2396
AC005037.6	0	0	0	0	0	1.0658
AC005040.1	0	0	0	0	0	0
AC005040.3	0	0	0	0	0	0
AC005041.11	0	0	0	0	0	0
AC005042.2	0	0.17973	0.155	0.20583	0.18057	0.22509
AC005042.3	0	0	0	0	0	0
AC005042.4	0.030502	0.079569	0.093012	0.093793	0.22585	0.16813
AC005042.5	0	0	0	0	0	0
AC005048.1	0	0	0	0	0	0
AC005060.1	0	0	0	0	0	0
AC005062.2	0.53636	0.15658	0.17567	0.13547	0	0.19917
AC005068.1	0.20581	0.18236	0.36685	0.1798	0.40892	1.4069
AC005071.1	0	0	0	0	0	0
AC005071.2	0	0	0	0	0	0
AC005071.3	2.9784	1.725	1.2656	0.84665	4.2591	3.4379
AC005075.5	0	0	0.064585	0	0	0
AC005076.5	0.55151	0.94693	0.42621	1.6594	1.1683	0.64875
AC005077.1	0.78305	0.45453	0.535	0.58084	1.59	1.2538
AC005077.14	0.061004	0.043647	0.064592	0.031259	0.045149	1.2856
AC005077.5	0	0	0	0	0	0
AC005077.7	0	0	0	0	0	0.94153
AC005077.8	0	0	0	0	0	0
AC005077.9	0	0	0	0	0	0
AC005082.1	1.7284	0	0.70521	1.1984	0	4.0659
AC005082.12	1.9158	2.0881	1.9486	3.0693	1.5187	2.3424
AC005082.2	5.8738	2.9468	5.1061	3.6057	10.388	7.2615
AC005082.3	0	0	0	0	0	0
AC005083.1	2.4306	0.16688	0.49864	0.21881	0	0.81517
AC005086.1	0	0	0	0	0	0
AC005086.2	6.3922	3.2807	2.3697	6.008	10.117	8.5562
AC005086.3	0.93274	0.67265	0.80598	0	1.031	0.47079
AC005086.4	0	0	0	0	0	0
AC005088.1	0	0	0	0	0	0
AC005094.2	0	0	0	0	0	0
AC005102.1	0	0	0	0	0	0
AC005104.1	0	0	0	0	0	0
AC005104.3	5.058	2.0894	2.0416	1.8131	1.9034	4.9696
AC005105.2	0	0	0	0.27095	1.711	0
AC005138.1	0	0	0	0	0	0
AC005150.1	0.23635	0.31317	0.13694	0	0.6214	0.32063
AC005152.1	0	0	0	0	0	0
AC005152.3	0	0	0	0	0	0
AC005154.5	1.199	0.81119	0.85297	2.5948	1.192	1.6917
AC005154.6	13.778	4.9045	5.1814	21.599	26.3	17.312
AC005154.7	4.3871	1.0584	2.0023	5.1403	2.1415	5.3626
AC005154.8	1.7389	1.2246	0.88868	1.6204	2.127	3.0883
AC005154.9	0.58961	0.048771	0	0.38561	0	0.39572
AC005159.1	0	0	0	0	0	0
AC005160.3	0	0	0	0	0	0
AC005161.1	0	0	0	0	0	0
AC005162.3	0	0	0	0.057333	0	0
AC005162.4	0	0	0	0	0	0
AC005162.5	0	0	0	0	0	0
AC005178.1	0	0	0	0	0	0
AC005181.1	0	0	0	0	0	0
AC005187.1	0	0	0	0	0	0
AC005189.1	1.2741	1.2504	0.98675	0.4586	1.9108	1.3995
AC005189.6	0	0	0	0.30221	0	0
AC005197.1	2.2191	2.5335	1.8998	2.4783	2.7268	3.6715
AC005197.2	0	0	0	0	0	0
AC005197.3	0	0	0	0	0	0
AC005197.4	2.3145	1.5269	4.5606	2.5202	5.9827	6.1373
AC005208.1	0	0	0	0	0	0
AC005215.1	0	0	0	0	0	0
AC005220.3	0.2084	0	0	0.42981	0.62392	0
AC005224.1	0	0	0	0	0	0.031038
AC005224.2	0.34068	0.32096	0.25832	0.32046	0	0.39565
AC005225.1	0	0	0	0	0	0
AC005229.5	0	0	0	0	0	0
AC005229.7	0	0	0	0	0	0
AC005232.1	0	0	0	0.46379	0	0
AC005235.1	0	0	0	0	0	0
AC005236.1	0	0	0	0	0	0
AC005237.2	0	0	0	0	0	0
AC005237.4	0.038123	0.24903	0.18597	0	0	0
AC005243.1	0	0	0	0	0	0
AC005251.1	0	0	0	0	0	0
AC005251.2	0	0	0	0	0	0
AC005251.3	0.26688	0	0.062014	0	0	0
AC005255.6	0	0	0	0	0	0
AC005271.1	0.11695	0.061616	0.13692	0.15894	0	0.2949
AC005276.1	0.45238	0.44172	0.57861	0.65654	1.2799	2.1518
AC005281.1	0	0	0	0	0	0
AC005281.2	0	0	0	0	0	0
AC005284.1	0	0	0	0	0	0
AC005300.5	1.4309	1.222	0.97137	0.68004	0	0.73715
AC005301.8	0	0.066751	0.036169	0	0	0
AC005304.1	0	0.066742	0.26865	0	0	0.49147
AC005323.1	0	0	0	0	0	0
AC005324.6	3.6958	0	0	0	0	0
AC005324.7	0	0	0	0	0	0
AC005329.1	0	0	0	0	0.29742	0
AC005329.7	0.64096	1.4067	1.5737	0.35947	0.1859	1.0509
AC005332.1	4.2841	3.4178	5.1075	3.0618	2.6788	9.4136
AC005332.2	0.36354	0.48773	0.57101	0.29965	0.62179	1.3217
AC005336.1	0	0	0	0	0	0.19915
AC005351.1	0	0	0	0	0	0
AC005355.1	0	0	0	0	0	0
AC005355.2	0	0	0	0	0	0
AC005358.1	0.11193	0.17201	0.27899	0.172	0.32147	0.22247
AC005358.3	0	0	0	0	0	0
AC005363.9	8.8086	6.8964	11.889	3.0534	2.5233	8.8738
AC005370.1	0	0	0	0	0	0
AC005392.13	0	0	0	0	0	0
AC005392.2	0	0	0	0	26.492	0
AC005394.1	0	0	0	0	0	0.39567
AC005394.2	0.081334	0.079588	0.054261	0.036473	0.10091	0.17338
AC005410.1	0	0	0	0	0	0
AC005481.5	0.13472	0.077005	0.064582	0	0	0.11123
AC005484.2	0	0	0	0	0	0
AC005487.2	0	0	0	0	0	0
AC005488.1	8.3652	9.3627	9.088	2.0324	0.20462	4.2996
AC005488.11	1.1844	0.75934	1.1498	0.54995	0.40376	0.95175
AC005488.13	1.3219	0.98595	1.0408	0.4327	0.53909	1.1389
AC005493.1	0	0	0	0	0	0
AC005498.1	0.52864	0.19505	0.14981	0.13026	0.092947	0.40088
AC005498.2	0.38122	0.49809	0.60202	0.18237	0.021245	0.81735
AC005512.1	0.32026	0	0	0	0	0
AC005512.2	0	0	0	0	0	0
AC005512.4	0.60255	0.33625	0.49097	0.68256	1.23	0.52653
AC005513.1	0	0	0	0	0	0
AC005517.1	0.26433	0.18227	0.20931	0.33352	0.46496	0.7422
AC005517.3	1.0192	0.45698	0.49088	0.53929	0.25776	3.3804
AC005518.2	0	0	0	0	0	0
AC005522.6	0	0	0	0	0	0
AC005522.7	0	0	0	0	0	0
AC005532.5	0.4678	0.5443	0.57353	0.26053	0.60821	0.56103
AC005534.6	0.38889	0	0	0	0	0
AC005534.8	0.34821	0.46983	0.41598	0.34651	0.33728	0.39832
AC005534.9	0.83093	1.3484	1.6116	1.1566	0.89003	2.3537
AC005537.2	0	0	0	0	0	0
AC005538.5	0	0	0	0	0	0
AC005539.2	0	0	0	0	0	0
AC005540.3	0.84392	0.37492	0.61749	0.44036	0.41724	1.8784
AC005544.1	0	0	0	0	0	0.13191
AC005550.3	0	0	0	0	0	0
AC005550.5	0	0	0	0	0	0
AC005562.1	6.0101	2.3397	3.1838	5.0471	2.138	8.1952
AC005586.1	0	0	0	0	0	0
AC005586.2	0.076228	0.071878	0.051676	0.096398	0.087633	0.085368
AC005588.2	0	0	0	0	0	0
AC005592.1	0	0	0	0	0	0
AC005592.2	0	0	0	0	0	0
AC005609.1	0	0	0	0	0	0
AC005609.17	0.08388	0.074447	0.080098	0.054715	0.14343	0.17331
AC005609.2	0	0	0	0	0	0
AC005618.1	0.3304	0.12328	0.1137	0.054739	0.20716	0.32585
AC005626.1	0	0	0	0	0	0
AC005631.1	0	0	0	0	0	0
AC005631.2	0.022875	0	0	0	0	0
AC005632.1	0	0	0	0	0	0
AC005632.2	0.18301	0.097562	0.11884	0.16935	0.14073	0.059523
AC005632.3	0	0	0	0	0	0
AC005632.4	0.47524	0.22335	0.21962	0.020843	0	0.67514
AC005674.1	3.0037	4.3463	4.861	2.759	9.7728	6.6821
AC005682.5	3.6634	2.02	2.988	0.495	0	1.5417
AC005682.6	0.52352	0.35166	0.20925	0.054707	0	0.2819
AC005682.7	0.37872	0.29775	0.095592	0	0	0
AC005682.8	0.21096	0	0	0	0	0
AC005692.1	0	0.65715	0.28931	0	0	0
AC005696.2	15.043	14.118	10.978	12.548	31.893	7.5626
AC005697.1	0	0	0	0	0	0
AC005697.2	0.15509	0.11296	0.15756	0.12767	0.14071	0.16295
AC005702.2	0.5187	0.30816	0.60475	0.30486	0.73041	0.99341
AC005703.2	0	0	0	0	0	0
AC005703.3	0	0	0	0	0	0
AC005722.4	0	0	0	0	0	0
AC005725.1	0	0	0	0	0	0
AC005726.1	0	0	0	0	0	0
AC005726.2	7.5592	0	0	10.229	22.395	9.3158
AC005726.3	0	0	0	0	0	0
AC005726.4	4.2384	1.1064	1.3254	3.1732	2.907	5.4344
AC005726.6	0	0	0	0	0	0
AC005726.7	0	0	0	0	0	0
AC005730.2	0	0	0	0	0	0
AC005740.3	0	0	0	0	0	0.42421
AC005740.4	0	0	0	0	0	0
AC005740.5	0	0	0	0	0	0.20174
AC005741.2	0	0	0	0	0	0
AC005746.1	0	0	0	0	0	0
AC005752.1	0	0.041076	0.041337	0	0	0
AC005752.2	0	0	0	0	0	0
AC005752.3	0.043218	0.0025669	0.031004	0.031264	0.079718	0.051733
AC005753.1	0.11442	0.053908	0.14982	0.10943	0.101	0.75791
AC005754.1	0	0.010268	0.0077496	0	0	0
AC005768.1	0.37376	0.17462	0.20659	0.77643	0.30539	0.50734
AC005772.2	0	0	0	0	0	0
AC005779.1	0.51346	0.064173	0	0.35174	0.68276	0.84325
AC005795.1	0.74977	0.51855	0.57861	0.25798	0.18325	0.5896
AC005803.1	0.31275	0.31597	0.39555	0.31519	0.53419	0.39577
AC005808.3	0	0.43133	0.59938	0	0	0.90241
AC005822.1	0.12453	0.10269	0.12399	0.065136	0	0.19143
AC005826.1	0	0	0	0	0	0
AC005829.1	0.027957	0	0	0	0	0.21727
AC005831.1	0.17031	0.24905	0.25321	0.11724	0.20447	0.55617
AC005837.1	3.1579	8.203	11.758	1.9723	3.507	6.5973
AC005838.1	0	0.12581	0.015499	0	0	0.13191
AC005838.2	0	0	0	0	0	0
AC005841.1	1.2581	0.49312	0.48332	0.89094	0	1.6865
AC005863.1	0.022874	0	0.020665	0	0.042484	0.062078
AC005863.2	0	0	0	0	0	0
AC005866.1	0	0	0	0	0	0
AC005879.1	0	0	0	0	0	0
AC005895.3	0.099126	0	0.1731	0	0	1.0608
AC005899.1	0.10421	0.046208	0.077505	0.096422	0.2868	0.20437
AC005908.1	0	0	0	0	0	0
AC005915.1	2.1702	1.4553	0.96885	0.26837	0	2.5798
AC005926.1	0	0	0	0	0	0
AC005940.1	0.49322	0.42603	0.30229	0.28659	0.47534	0.58983
AC005945.1	0.11694	0.13609	0.12658	0.12765	0.12494	0.10865
AC005946.1	0.19826	0.071871	0.072338	0.22924	0.13015	0.10089
AC005971.2	3.2411	2.2201	3.2895	0.891	0.76756	1.5956
AC005971.3	4.9047	2.9041	2.8288	1.6072	0	2.7722
AC006000.5	0	0	0	0	0	0
AC006001.2	0.55164	0.3747	0.58376	1.4276	1.1069	1.1617
AC006002.1	13.03	5.4832	5.8466	8.0295	17.476	17.252
AC006003.3	0	0	0	0	0	0
AC006004.1	0.040671	0	0.031	0.0026053	0.053112	0.059488
AC006007.1	0	0	0	0	0	0
AC006011.4	4.7057	5.6568	6.2002	5.4347	1.3041	8.4187
AC006013.1	0	0	0	0	0	0
AC006014.1	5.9739	4.9539	5.9261	1.8419	0.68238	4.0587
AC006014.10	0.54384	0.04364	0.17313	0.12766	0.018587	0.48106
AC006014.5	1.8683	1.0167	1.1008	0.78683	0.51787	1.2801
AC006014.7	1.8596	2.2972	2.8991	0.96388	1.3915	3.0678
AC006014.8	0.29993	0.46718	0.36939	0.32828	0	0.7061
AC006017.1	0	0	0	0.79461	0	0
AC006019.3	0.27446	0.16941	0.22216	0.093781	0.13276	0.34402
AC006019.4	0	0	0	0	0	0
AC006021.1	0.49045	0.13865	0	0.1954	0	3.409
AC006022.4	0	0	0	0	0	0
AC006026.1	0	0	0	0	0	0
AC006026.12	0	0	0	0	0	0
AC006026.13	0	0	0	0	0	0
AC006026.9	0	0	0	0	0	0
AC006027.2	1.5584	0.41078	1.7336	1.532	3.7474	1.914
AC006028.10	0.1703	0	0	0.21886	0	0
AC006028.11	0	0	0	0	0	0
AC006028.9	1.1795	0.10524	0.11886	0.24752	0.17801	0.22515
AC006032.1	0	0	0	0	0	0
AC006033.13	0	0.31321	0.58651	0	0	18.993
AC006033.22	0	0	0.36429	0.46385	0	1.1929
AC006035.1	0	0.12835	0.17826	0.054712	0	0.20438
AC006037.2	0	0	0	0	0	0
AC006038.4	0	0	0	0	0	0
AC006040.1	0	0	0	0	0	0
AC006041.1	0	0	0	0	0	0
AC006042.6	0	0.046203	0	0.020843	0.316	0.45535
AC006042.7	0.53369	0.39793	0.33328	0	0	0.66733
AC006042.8	0.69906	1.8849	1.475	0.1511	0.54436	1.0479
AC006050.2	0.13214	0	0	0	0	0
AC006057.1	0.34316	0.17977	0.28679	0.36217	0.97502	0.32588
AC006057.2	0	0.30551	0.24287	1.9279	7.561	1.8881
AC006062.1	0	0	0	0	0	0
AC006065.1	0	0	0	0	0	0
AC006065.2	0	0	0	0	0	0
AC006070.12	0	0	0	0	0	0
AC006076.1	0	0	0	0	0	0
AC006111.1	0.025419	0	0	0	0	0
AC006111.2	0	0	0	0	0	0
AC006115.1	0.040665	0.0051338	0.020665	0.03387	0	0
AC006116.1	2.124	1.0137	0.85519	0.17715	0.19387	1.4101
AC006125.1	0.58489	0.29788	0.46753	0.33087	1.4002	0.6129
AC006128.1	0.63271	0.52105	0.41603	0.43768	1.1982	0.63874
AC006132.2	0.63039	0.59316	1.0565	0.32823	0.0186	1.9535
AC006133.3	0	0	0	0	0	0
AC006144.1	0	0	0	0	0	0
AC006145.4	0.022877	0	0	0	0.053133	0.11122
AC006146.1	0	0.93957	1.4881	0.42987	0	0.46034
AC006150.1	0	0	0	0	0	0
AC006150.2	0	0	0	0	0	0
AC006153.3	0	0	0	0	0	0
AC006156.3	0	0	0	0	0	0
AC006156.4	0	0	0	0	0	0
AC006156.5	0	0	0	0	0	0
AC006156.6	0	0	0	0	0	0
AC006157.2	0	0	0	0	0	0
AC006159.4	0	0	0	0	0	0
AC006159.5	0	0	0	0	0	0
AC006160.1	4.6911	1.5239	2.1839	4.4864	3.2483	4.6605
AC006160.5	0.34817	0.30811	0.087824	0.18758	0.52609	0.26642
AC006160.8	3.6441	1.576	1.2274	1.8966	1.6074	1.9605
AC006195.2	0.13216	0.10526	0.27383	0.10421	0	0.55878
AC006196.1	0	0	0	0	0	0
AC006205.1	0	0	0	0	0	0
AC006213.1	0.18812	0.1566	0.056842	0.10421	0.058462	0.20697
AC006213.2	1.1564	0.48263	0.44955	0.21362	0.077005	1.1018
AC006227.1	0	0	0	0	0	0
AC006230.4	0	0	0	0	0	0
AC006262.2	0	0	0	0	0	0
AC006277.2	0.46278	0.52634	0.33587	0.34916	0	0.46558
AC006288.1	0	0	0	0	0	0
AC006296.1	0	0	0	0	0	0
AC006296.2	0	0	0	0	0	0
AC006315.1	0	0	0	0	0	0
AC006322.1	0	0	0	0	0	0
AC006323.1	0	0	0	0	0	0
AC006326.3	0	0	0	0	0	0
AC006326.5	0	0	0	0	0	0
AC006328.1	0	0	0	0	0	0
AC006328.9	0	0	0	0	0	0
AC006335.10	0	0	0	0	0	0
AC006335.11	0	0	0	0	0	0
AC006335.12	0	0	0	0	0	0
AC006335.2	0	0	0	0	0	0
AC006335.6	0	0	0	0	0	0
AC006335.7	0	0	0	0	0	0
AC006355.3	0	0	0	0	0	0
AC006357.1	0.77526	0.74196	1.0877	0.76601	0	1.5812
AC006366.3	0	0	0	0	0	0
AC006367.1	0.094035	0	0	1.386	0	0
AC006368.1	1592.7	4226.1	2158.7	3298.9	1722.1	1975.7
AC006369.2	0.73705	1.3483	2.7411	0	0	3.8382
AC006369.3	0	0	0	0	0	0
AC006370.2	0.035579	0	0.028423	1.4876	0	0
AC006371.1	0	0	0	0	0	0
AC006372.1	0	0	0	0	0.084965	0.046558
AC006372.2	0	0	0	0	0	0
AC006372.4	0.020336	0	0	0	0.0531	0.041394
AC006372.5	0	0	0	0	0	0
AC006372.6	0	0.5519	0	0	0.64794	0
AC006373.1	0	0	0	0	0	0
AC006377.1	0	0	0	0	0	0
AC006378.2	0.6733	0.34133	0.63818	0.33871	0	0.93418
AC006378.3	2.8936	1.8534	2.2968	1.0343	0	2.6748
AC006380.1	0	0	0	0	0	0
AC006380.3	0	0	0	0	0	0
AC006390.4	0	0	0	0	0	0
AC006427.1	1.9453	0.3698	0.63287	0.70603	0.36909	0.40353
AC006427.2	0	0	0	0	0	0
AC006435.1	0.65371	0.92132	1.057	0.45863	0.7916	0.84584
AC006443.1	0.061011	0.043646	0.10334	0.17716	0.053102	0.062084
AC006445.1	0	0	0	0	0	0
AC006445.6	0	0	0	0	0	0
AC006445.7	0.050834	0	0	0	0	0
AC006452.1	0	0	0	0	0	0
AC006455.2	0	0	0	0	0	0
AC006458.3	0	0	0	0	0	0
AC006460.2	0	0	0	0.23185	0.4012	0.1966
AC006461.2	0	0	0	0	0	0
AC006466.1	0.61264	0.15654	0.15772	0.68523	0.80777	0.63914
AC006466.5	0	0	0	0	0	0
AC006480.1	0.68376	0.68037	0.323	0.47942	0.44881	0.69591
AC006482.1	0	0	0	0	0	0
AC006483.5	0	0	0	0	0	0
AC006483.8	0.19824	0.077015	0.077509	0.7736	0.50706	0.16301
AC006486.1	0.21598	0.14125	0.090451	0.14586	0.26038	0.17847
AC006487.1	0	0	0	0	0	0
AC006499.1	0	0	0	0	0	0
AC006499.2	0	0	0	0	0	0
AC006499.3	0	0	0	0	0	0
AC006499.4	0	0	0	0	0	0
AC006499.5	0	0	0	0	0	0
AC006499.6	0	0	0	0	0	0
AC006499.7	0	0	0	0	0	0
AC006504.1	2.0541	0.6754	0.54503	1.3395	0.52845	1.112
AC006504.2	0.58164	0.52927	0.44193	0.65153	0.21791	0.51042
AC006504.3	0.25684	0.20026	0.15244	0.26581	0.042493	0.33366
AC006509.4	0	0	0	0	0	0
AC006509.6	0.38132	0.1181	0.025839	0	0	0
AC006509.7	1.0329	1.5712	1.7306	1.2046	0.76482	2.1022
AC006517.1	0	0	0	0	0	0
AC006534.1	0	0	0	0	0	0
AC006538.1	6.9772	4.2619	5.9182	3.088	0.5526	3.967
AC006539.2	0.38127	0.53394	0.37205	0	0	0.37233
AC006547.1	0	0	0	0	0	0
AC006547.13	1.3958	0.9269	0.57639	1.3782	2.7656	2.6248
AC006547.14	0.47009	0.48519	0.6255	0.714	0	1.0783
AC006547.8	0	0	0	0.40906	0.11949	0
AC006548.19	0	0	0	0	0	0
AC006552.1	0.0050823	0.061619	0.031	0.0026053	0	0.062063
AC006557.1	0	0	0	0	0	0
AC006559.1	0	0	0	0	0	0
AC006559.2	0	0	0	0	0	0
AC006926.1	0	0	0	0	0	0
AC006927.1	0	0	0	0	0	0
AC006927.2	0	0	0	0	0	0
AC006927.3	0	0	0	0	0	0
AC006927.4	0	0	0	0	0	0
AC006946.12	1.0268	0.58281	0.92749	9.8416	11.381	2.4146
AC006946.15	0	0	0	0.39337	0.57145	0.090534
AC006947.1	0	0	0	0	0	0
AC006960.5	0	0	0	0	0	0
AC006960.7	0	0	0.064577	0.26317	0.41715	0.55889
AC006978.6	9.1613	3.082	3.5814	6.9996	5.8546	12.772
AC006987.4	0	0	0	0	0	0
AC006987.5	0	0	0	0	0	0
AC006987.6	0	0	0	0	0	0
AC006988.1	0	0	0	0	0	0
AC006989.2	0	0	0	0	0	0
AC006994.1	0.42951	0.18741	0.13434	0.14071	0.28948	0.41122
AC006994.2	0	0	0	0.29961	0	0
AC006995.1	33.554	3.0725	1.6255	36.899	157.48	5.3056
AC006995.8	1.3219	0.98595	1.0408	0.4327	0.53909	1.1622
AC006999.1	0	0	0	0	0	0
AC007000.10	1.0066	0.51864	0.25577	0.6358	3.5334	0.88457
AC007000.11	19.107	32.376	20.635	12.177	29.964	26.003
AC007001.1	0.45237	0	0.054254	0	0	0
AC007001.3	0	0	0	0	0	0
AC007003.1	0.01779	0	0	0	0	0
AC007006.1	0	0	0	0	0	0
AC007009.1	0	0	0	0	0	0
AC007016.3	0	0	0	0	0	0
AC007036.4	0.31769	0.46219	0.22995	0.45072	0.70895	0.84329
AC007036.5	0	0.04621	0.434	0.12765	0	0
AC007036.6	0.18808	0	0	0.3777	0.44873	0
AC007038.7	1.3374	0.45172	0.45474	0.91959	0.36412	5.8057
AC007040.6	0.30752	0.30551	0.12142	0.45069	0	0.45006
AC007040.8	0	0	0	1.4538	0	0
AC007041.1	0	0	0	0	0	0
AC007041.2	0.35845	0.25417	0.16786	0	0	0.25092
AC007050.17	0	0	0	0	0	0.069833
AC007050.18	0	0	0	0	0	0.17334
AC007056.1	0	0	0	0	0	0
AC007064.22	0	0	0	0	0	0
AC007064.24	0.13216	0	0	0	0	0
AC007064.25	0	0	0	0	0	0
AC007064.28	0	0	0	0	0	0
AC007066.1	0.63823	0.52145	0.66128	0.53155	0.70363	3.0675
AC007078.4	0	0	0	0	0.31085	0
AC007091.1	0	0	0	0	0	0
AC007096.1	0	0	0	0	0	0
AC007098.1	0	0	0	0	0	0
AC007099.1	0.48807	0.25419	0.3591	0.37004	0.91095	0.72227
AC007099.2	0	0	0	0	0	0
AC007106.1	0	0	0	0	0	0
AC007126.1	0.52626	0.43673	0.40805	0.641	1.0256	0.78084
AC007128.1	0	0	0	0	0	0
AC007130.1	0.72954	0.65204	0.69246	0.11203	0	1.7822
AC007130.2	0.061008	0	0.051675	0.057316	0	0.064664
AC007131.1	0	0	0	0	0	0
AC007131.2	0	0	0	0	0	0
AC007131.3	0	0	0	0	0	0
AC007161.5	0.34564	0.22846	0.13949	0	0.29736	0
AC007163.10	0	0	0	0	0	0
AC007163.11	0	0	0	0	0	0
AC007163.3	0	0	0	0.23186	0.04514	0.15265
AC007163.6	0.25927	0.33118	0.27389	0.24491	0.25491	0.4477
AC007163.8	0	0	0	0	0	0
AC007163.9	0	0	0	0	0	0
AC007179.1	0	0	0	0	0	0
AC007179.2	0	0	0	0	0	0
AC007182.6	0	0	0	0.1459	0	0
AC007193.1	0.12455	0.10269	0.11367	0.075569	0	0.22504
AC007216.1	6.3003	4.3	4.0641	5.4585	7.4771	6.56
AC007225.1	0	0	0	0	0	0
AC007228.1	0.1322	0.11295	0.095567	0.085984	0	0.14229
AC007237.2	0	0	0	0	0	0
AC007238.1	0	0	0	0	0	0
AC007239.1	0	0	0	0	0	0
AC007241.1	0	0	0	0	0	0
AC007241.2	0	0	0	0	0	0
AC007241.3	0.099121	0.020535	0	0	0	0.1345
AC007242.1	0	0	0	0	0	0
AC007244.1	0	0	0	0	0	0
AC007245.3	1.1537	2.7253	7.9107	3.1395	0.13019	13.465
AC007246.3	2.5038	2.2201	1.3226	2.1345	1.1683	2.3951
AC007248.7	0	0	0	0	0.24163	0.44753
AC007249.3	0.87183	0.81381	0.41339	0	0	0.69063
AC007250.4	0.51093	0.35432	0.21453	0.4169	0.86622	0.48154
AC007251.2	0	0	0	0	0	0
AC007253.1	0	0	0	0	0	0
AC007255.8	0	0	0	0.02084	0	0
AC007256.5	0.90759	0.53928	0.36437	0.15631	0.13539	0.49147
AC007271.3	0	0	0	0	0	0
AC007272.1	0	0	0	0	0	0
AC007272.2	0.77547	0	0	0	1.9306	0
AC007272.3	0.25926	0	0	0	0.59743	0.023279
AC007274.2	0	0	0	0	0	0
AC007274.5	0	0	0	0	0	0
AC007276.1	0.35077	0	0	0.062533	0	0.88742
AC007276.3	0.78025	0	0.25836	0.91216	0	1.6451
AC007276.4	0	0	0	0	0	0
AC007276.6	0.33044	0	0.015502	0.046893	0	0
AC007276.7	0.55411	0.31064	0.28936	0.66706	0.23366	1.0632
AC007277.3	0	0	0	0	0	0
AC007278.2	0	0.19769	0.78277	0	11.36	22.129
AC007278.3	0	0.38507	2.6013	0.0078158	20.093	38.207
AC007279.2	0.16776	0	0.24028	0.1042	0	0.40614
AC007282.1	0	0	0	0	0	0
AC007282.2	0	0	0	0	0	0
AC007282.3	0	0	0	0	0	0
AC007282.6	0	0	0	0	0	0
AC007283.1	0	0	0	0	0	0
AC007283.2	0	0	0	0	0	0
AC007283.3	0	0	0	0	0	0
AC007283.4	0	0	0	0	2.1488	0
AC007283.5	7.6418	5.5899	14.647	15.202	85.634	21.854
AC007284.1	0	0	0	0	0	0
AC007285.1	0	0	0	0	0	0
AC007285.6	0.52876	0.27986	0.323	0.48449	0.026583	0.54346
AC007285.7	0.21352	0.23878	0.27386	0.1954	0	0.21985
AC007308.6	0.72985	0.87565	1.1242	0.83889	0.99872	1.0452
AC007312.3	0	0	0	0	0	0
AC007314.1	0.74436	0.88565	0.91932	0.60706	0.6562	0.72955
AC007317.1	0	0	0	0	0	0
AC007318.5	0.39904	0.45438	0.819	0.72701	0	0.59236
AC007319.1	0.65073	0.33382	0.50901	0.6568	0.76525	1.0939
AC007320.3	0	0	0	0	0	0
AC007322.1	0	0	0	0	0	0
AC007322.3	0	0	0	0	0	0
AC007322.5	0	0	0	0	0	0
AC007322.7	0	0	0	0	0	0
AC007327.5	0	0	0	0	0	0
AC007327.6	0	0	0	0	0.23919	0
AC007333.1	0	0	0	0	0	0
AC007333.2	0	0	0	0	0	0
AC007339.1	0	0	0	0	0	0
AC007340.1	0	0	0	0	0	0
AC007342.1	0.10167	0.15146	0.12916	2.762	22.247	0.36211
AC007346.1	0	0	0	0	0	0
AC007349.4	0	0	0	0	0	0
AC007349.5	0	0.36449	0.65355	0	0	2.2638
AC007349.7	0	0	0	0	0	0.35174
AC007353.1	0	0	0	0	0	0
AC007353.2	0	0	0	0	0	0
AC007358.1	0	0	0	0	0	0
AC007359.6	0	0.038503	0	0	0	0
AC007362.1	0.48039	0	0	0.48199	0	0
AC007362.3	0	0	0	0	0	0
AC007364.1	0	0	0	0	0	0
AC007365.1	0	0	0	0	0	0.038799
AC007365.2	0	0	0	0	0	0
AC007365.3	0.31518	0	0	0.47677	0.45453	0.58699
AC007365.4	0	0	0	0	0	0
AC007379.1	0	0	0	0	0	0
AC007379.5	0	0	0	0	0	0
AC007381.2	1.2433	0	0	0	0	0
AC007381.3	1.1483	0	0	0	0	0.031039
AC007383.3	2.6707	1.4174	2.0226	1.393	1.2043	4.8954
AC007383.4	0.81102	0.97027	0.73633	0.99767	1.2612	1.4432
AC007383.6	0	0	0	0	0	0
AC007384.1	1.2785	0	0	0.64352	1.5326	2.5324
AC007384.2	0	0	0	0	0	0
AC007385.1	0	0	0	0	0	0
AC007386.2	1.2454	0.43639	0.31011	0.32572	0.61931	0.51413
AC007386.3	1.8351	0.249	0.33073	0.29701	0	0.63112
AC007386.4	1.7928	0.1181	0.16535	0.10683	0	0.17591
AC007387.1	0.81109	1.127	1.0175	0.15632	0.0079659	1.8631
AC007387.2	0	0	0	0	0	0
AC007388.1	0.91756	0	0.86809	0	0	0
AC007389.1	0	0	0	0	0	0
AC007389.2	0	0	0	0	0	0
AC007389.3	2.7918	1.8919	1.5189	2.6441	5.5338	3.5732
AC007390.4	0	0	0	0	0	0
AC007390.6	0.66573	1.2629	1.9583	0.55489	0.11957	1.715
AC007391.1	0	0	0	0	0	0
AC007391.2	0	0	0	0	0	0
AC007392.3	0	0	0	0	0	0
AC007392.4	0	0	0	0	0	0
AC007394.3	0	0	0	0	0	0
AC007395.3	0	0	0	0	0	0
AC007395.4	0	0	0	0	0	0
AC007401.2	0.64305	0.54934	0.50117	1.1047	0.96395	1.2988
AC007402.1	0	0	0	0	0	0
AC007403.1	0	0	0	0	0	0
AC007403.2	0	0	0	0	0	0
AC007403.3	0	0	0	0	0	0
AC007405.4	0.54676	0.59051	0.31793	0.39881	0.65862	0.51932
AC007405.6	0	0	0.1576	0	0	0.48373
AC007405.8	0	0	0	0	0	0
AC007421.1	0	0	0	0	0	0
AC007422.1	0	0	0	0	0	0
AC007431.2	0	0	0	0	0	0.049144
AC007436.1	0	0	0	0	0	0
AC007436.2	0	0	0.16533	0	0	0.42401
AC007437.1	0	0	0	0	0	0
AC007450.1	0	0	0	0	0	0
AC007461.2	0	0	0	0	0	0
AC007463.2	0	0	0	0	0	0
AC007465.1	0	0	0	0	0	0
AC007486.1	0	0	0	0	0	0
AC007491.1	0	0	0	0	0	0
AC007493.1	0	0	0	0	0	0
AC007497.1	0	0	0	0	0	0.074983
AC007528.1	0	0	0	0	0	0
AC007535.1	0	0	0	0	0	0
AC007537.2	0	0	0	0	0	0
AC007546.1	0	0.67512	0	0	0	0
AC007547.1	0	0	0	0	0	0
AC007551.1	0	0	0	0	0	0
AC007551.2	0.22117	0	0	0	0	0
AC007556.3	0	0	0	0	2.1668	0
AC007557.1	0	0	0	0	0	0
AC007557.2	0	0	0	0	0	0
AC007557.3	0	0	0	0	0	0
AC007557.4	0	0	0	0	0	0
AC007559.1	0	0	0	0	0	0
AC007560.1	0	0	0	0	0	0
AC007560.2	0	0	0	0	0	0
AC007562.1	0	0	0	0	0	0
AC007563.1	0	0	0	0	0	0
AC007563.3	0	0	0	0	0	0
AC007563.4	0	0	0	0	0	0
AC007563.5	0	0	0	0	0	0
AC007566.10	3.4028	2.577	1.8161	3.1419	1.1235	5.5879
AC007567.1	0	0	0	0	0	0
AC007568.1	0	0	0	0	0	0
AC007595.1	0	0	0	0	0	0
AC007595.2	0	0	0	0	0	0
AC007595.3	0	0	0	0	0	0
AC007595.4	0	0	0	0	0	0
AC007595.5	0	0	0	0	0	0
AC007599.1	4.3789	11.518	7.1064	9.3178	4.1416	6.5944
AC007603.1	0.07627	0.041076	0.0077513	0.054709	0.11684	0.10089
AC007608.2	0.31272	0.30292	0.27129	0.53147	0.96139	0.30525
AC007610.2	0.40417	0.29517	0.35148	0.76085	0.36413	1.2239
AC007611.1	0	0	0	0	0	0
AC007618.3	2.3947	1.245	1.8036	2.3789	4.439	2.2818
AC007619.1	1.3701	4.2153	2.3835	0.93295	1.4806	1.8106
AC007620.3	2.4749	0.31323	0.21445	5.2799	5.4116	0.65929
AC007622.1	1.7537	0.15665	0.36179	0.18502	0.26546	0.39333
AC007623.1	3.5576	1.5557	1.8629	1.1151	1.2092	2.2096
AC007623.2	0	0	0	0	0	0
AC007638.1	0.17797	0.10012	0.14981	0.14071	0.16461	0.24832
AC007649.1	0	0	0	0	0	0
AC007652.1	0.020335	0.005134	0.033585	0	0	0.077612
AC007673.1	0	0	0	0	0	0.75782
AC007677.2	0	0	0	0	0	0
AC007677.3	0	0	0	0.13027	0	0
AC007679.1	0	0	0	0	0	0
AC007679.3	0	0	0	0	0	0
AC007679.4	0	0	0	0	0	0
AC007680.2	0	0	0	0	0	0
AC007682.1	0.045759	0.041076	0.03101	0.075569	0.079735	0.067251
AC007682.2	0	0	0	0	0	0
AC007683.1	0.050839	0	0.18086	0	0	0
AC007686.2	5.138	1.8569	3.0408	2.7227	11.829	5.1778
AC007687.1	0	0	0	0	0	0
AC007690.1	0.78285	0.51604	0.53475	0.33348	0	0.91037
AC007739.1	2.0537	0.9577	0.83491	1.2375	2.0924	2.1293
AC007740.1	0	0	0	0	0	0
AC007742.3	0	0	0	0	0	0
AC007742.6	0	0	0	0	0	0
AC007743.1	8.7242	3.3885	3.2393	5.4906	13.404	8.3764
AC007750.5	0	0	0	0	0.034541	0
AC007773.1	0.21859	0.17713	0.21443	0.31263	0.13808	0.35186
AC007780.1	0	0	0	0	0	0
AC007785.1	0	0	0	0	0	0
AC007785.2	0	0	0	0	0	0
AC007790.1	0	0	0	0	0	0
AC007790.4	1.0062	1.9436	1.165	0.94844	0.16208	1.1409
AC007834.2	0	0	0	0	0	0
AC007842.1	0	0	0	0	0	0
AC007875.2	0.99121	1.8785	1.4961	0.85974	0.77313	1.4975
AC007875.3	0.73712	0.34397	0.40815	0.27359	0.055823	0.81477
AC007878.1	1.2106	0.50816	1.0751	1.5687	2.5974	1.3956
AC007879.1	0	0	0	0	0	0
AC007879.2	2.2051	0.64164	0.39013	1.0473	3.6427	0.35949
AC007879.3	1.2021	0.42614	0	0	0.53638	0
AC007879.4	0	0	0	0	0.26836	0
AC007879.5	3.2478	0.59566	0.7311	0.77916	3.4349	0.65959
AC007879.6	0	0	0	0	0	0
AC007879.7	1.4261	0.45946	0.3539	0.60177	2.9058	0
AC007880.1	1.9513	0	0	0.062525	0.26553	0
AC007881.1	0	0	0	0	0	0
AC007881.4	0	0	0	0	0	0
AC007883.1	0	0	0	0	0	0
AC007899.3	0.88966	0.49285	0.89661	0.64356	0.41671	1.6633
AC007919.18	0	0	0	0	4.467	0
AC007919.19	0	0	0	0	0	0
AC007922.1	0	0	0	0	0	0
AC007938.1	0	0.21562	0.44435	0	0	0
AC007938.2	0.040666	0.12063	0.32553	0.031261	0.069043	0.080186
AC007952.1	0	0	0	0	0	0
AC007952.2	0.55413	0.18226	0.124	0	0	0
AC007952.3	0	0	0	0	0	0
AC007952.4	1.1184	0.15917	0.10332	0	0	0
AC007952.5	0	0.025672	0	0	0	0
AC007952.6	5.2237	0.53397	0.17567	0.13547	0	0
AC007956.1	1.0423	0.70616	0.65062	0.93281	2.728	2.4945
AC007965.12	0	0	0	0	0	0
AC007966.1	0	0	0	0	0	0
AC007967.1	0	0	0	0	0	0
AC007967.2	0	0	0	0	0	0
AC007967.3	0	0	0	0	0	0
AC007967.4	0	0	0	0	0	0
AC007969.4	0	0	0	0	0	0
AC007969.5	0.34565	0.42612	0.57102	0.10161	0	0
AC007991.1	0.11446	0.051337	0.072354	0.10422	0.17267	0.20952
AC008026.2	0.40686	0.45685	0.51922	0.224	0.51535	0.48342
AC008033.1	0.39906	0.077008	0.11625	0.16414	0.99622	0.46299
AC008038.1	0.46769	0	0.55549	0.62789	0	0.59763
AC008045.1	0	0	0	0	0	0
AC008060.5	0	0	0	0	0	0
AC008060.7	0	0	0	0	0	0
AC008060.8	0	0	0	0	0	0
AC008062.1	0.18809	0	0.31521	3.4967	0.74128	0.84038
AC008063.2	0	1.0706	1.1729	0	0	0
AC008063.3	0	0	0	0	0	0
AC008065.1	0	0	0	0	0	0
AC008067.2	0	0	0	0	0	0
AC008068.1	1.1291	0.57489	0.96143	0.5238	0.93746	1.8783
AC008069.1	0	0	0	0	0	0
AC008069.2	0	0	0	0	0	0
AC008072.1	0.45747	0.37741	0.29191	0.45855	0.53641	0.79165
AC008073.2	0.45496	0.15666	0.25312	0.25268	0.66922	0.30285
AC008073.7	0.21348	0	0.16794	0.22924	0.37455	0.3621
AC008073.9	0.10677	0	0	0	0.063722	0
AC008074.3	1.1031	0.49556	0.48829	0.57061	0.97459	0.96709
AC008074.4	0	0	0	0	0	0
AC008074.5	0.27201	0	0	0	3.8507	0
AC008079.9	0	0	0	0	0	0
AC008080.1	0	0	0	0	0	0
AC008080.2	0	0	0	0	0	0
AC008085.1	0	0	0	0	0	0
AC008088.3	0.030501	0.035944	0.051674	0.39858	0.21507	0.38801
AC008103.1	0	0	0	0	0	0
AC008105.1	3.845	2.731	4.8085	2.335	2.8216	3.4767
AC008105.2	4.9175	10.659	10.231	9.7916	12.762	9.3785
AC008122.1	0	0	0	0	0	0
AC008122.2	0.66588	0.23879	0.36201	0.36213	0.077003	1.335
AC008132.13	0.15253	0.2336	0.2222	0.052107	0.11683	0.13446
AC008132.14	0	0	0	0	0	0
AC008132.15	0	0	0	0	0	0
AC008132.2	0	0	0	0	0	0
AC008147.1	0	0	0	0	0	0
AC008147.2	0	0	0	0	0	0
AC008147.3	0.64857	0.439	0.65116	0.80245	1.714	1.0996
AC008154.1	0	0	0	0	0	0
AC008154.4	0	0	0	0	0	0
AC008154.5	0	0	0	0	0	0
AC008155.1	0.25164	0	0.38235	0	0	0
AC008155.2	0	0	0	0	0	0
AC008162.1	0	0	0	0	0.82891	0.30521
AC008163.4	0	0	0	0	0	0
AC008166.1	0	0	0	0	0	0
AC008171.1	0	0	0	0	0	0
AC008173.1	0	0	0	0	0	0
AC008175.1	0	0.038503	0	0	0	0
AC008175.10	0	0	0	0	0	0
AC008245.1	0	0	0	0	0	0
AC008264.4	0	0	0	0	0	0
AC008265.2	0	0	0	0	0	0
AC008267.1	0.12199	0.053906	0.077511	0.072956	0.1196	0.17331
AC008267.2	1.4056	1.6117	1.2968	0.7036	0.90867	2.2529
AC008268.1	0	0	0	0	0	0
AC008268.2	0.71676	0.43906	0.52199	0.088574	0	0.92332
AC008269.2	0	0	0	0	0	0
AC008271.1	0	0	0	0	0	0
AC008277.1	0	0	0	0	0	0
AC008278.2	0	0	0	0	0	0
AC008278.3	0.51866	0.5879	0.48315	0.45851	0.67768	0.65686
AC008280.1	0.26438	0.071881	0.064596	0.08336	0.053121	0.5224
AC008280.3	0	0	0	0	0	0
AC008280.4	1.1361	0.32871	0.73372	0.3022	0.28415	1.0914
AC008280.5	1.138	0.42628	0.74181	0.66707	0.70917	0.86896
AC008281.1	0	0	0	0	0	0
AC008379.1	0	1.217	1.4493	1.4463	4.8675	0.80433
AC008379.2	0	0	0	0	0	0
AC008392.1	13.167	3.5143	2.4303	11.859	7.1723	16.062
AC008393.1	0	0	0	0	0	0
AC008397.1	0	0	0	0	0	0
AC008403.1	0.34314	0.7778	0.52966	0.4767	1.1128	0.31819
AC008410.1	0	0	0	0	0	0
AC008412.1	0	0	0	0	0	0
AC008415.1	0	0	0	0	0	0
AC008427.2	0.42702	0.22591	0.29711	0.35428	0.20188	0.046555
AC008434.1	0	0	0	0	0	0
AC008434.2	0	0	0	0	0	0
AC008440.10	0.10423	0	0.1576	2.1782	0.35052	0.28706
AC008440.5	0	0	0	0.10941	0	0
AC008443.1	0	0	0	0	0	0
AC008449.1	0	0	0	0	0	0
AC008459.1	0	0	0	0	0	0
AC008474.1	0	0	0	0	0	0
AC008481.2	0.23133	0.066786	0.28682	0.13548	0.16994	0.20949
AC008494.1	0	0	0	0	0	0
AC008521.1	0	0	0	0	0	0
AC008537.3	0.94073	0.31582	0.61752	0.65137	0.95064	1.3242
AC008541.1	111.75	132.82	251.76	175.88	87.545	104.96
AC008545.1	0.050831	0	0	0.062527	0	0
AC008555.1	0.26442	0	0.23771	0	0	1.8936
AC008555.2	5.7431	4.434	4.7626	5.1468	16.86	9.4041
AC008555.3	0	0	0	0	0	0
AC008555.4	0.31014	0.46225	0.66105	0	0	1.1518
AC008555.5	0.071169	0.066747	0.043923	0	0	0.0388
AC008560.1	0	0	0	0	0	0
AC008565.1	0	0	0	0	0	0
AC008567.1	1.1238	0.51611	0.67691	0.59666	0.23354	1.92
AC008567.2	0.79571	0.33889	0.86556	0.39599	0.33724	0.77881
AC008569.1	1.2711	1.0529	1.2195	1.9696	5.7975	1.4662
AC008573.1	0	0	0	0	0	0
AC008581.1	0	0	0	0	0	0
AC008592.3	0.88973	1.0706	0.96383	0.40907	0.71219	1.7486
AC008592.4	0.038117	0	0	0.27615	0.74395	0.12415
AC008592.5	0	0	0	0	0	0
AC008592.7	0	0	0	0	0	0
AC008598.1	0	0	0	0	0	0
AC008620.1	0	0	0	0	0	0
AC008625.1	0	0	0	0	0	0
AC008635.1	0	0	0	0	0	0
AC008670.1	0	0	0	0	0	0
AC008670.2	0	0	0	0	0	0
AC008670.3	0	0	0	0	0	0
AC008670.4	0	0	0	0	0	0
AC008670.5	0	0	0	0	0	0
AC008671.1	0	0	0	0	0	0
AC008676.1	3.5023	2.9737	2.137	0.48722	2.7005	3.5014
AC008686.2	0.93289	0.64942	0.75183	0.78934	1.6734	0.81217
AC008687.1	0	0	0	0	0	0
AC008691.1	0	0	0	0	0	0
AC008694.1	0.37133	0.15663	0.16799	0.25007	0	0.27164
AC008694.2	0	0	0	0	0	0
AC008694.3	0	0	0	0	0	0
AC008695.1	0	0	0	0	0.92422	0
AC008697.1	0.52111	0.097547	0.067174	0	0.17804	0
AC008703.1	0.053372	0	0	0	0	0
AC008706.1	0	0	0	0	0	0
AC008728.1	0	0	0	0	0	0
AC008734.1	0.40161	0.0051334	0.06975	0	0	0
AC008734.2	0.22624	0	0.06458	0	0	0
AC008737.1	1.0777	0	0.010334	1.584	2.0526	1.1407
AC008738.1	0	0	0	1.2037	0	0.2923
AC008738.2	0	0	0	0	0	0
AC008740.1	38.389	4.7921	6.0916	26.92	18.408	50.151
AC008740.2	12.411	4.5	3.5212	4.4474	3.5212	6.5792
AC008740.3	26.314	10.033	13.058	10.08	5.9273	11.413
AC008746.10	0	0	0	0	0	0
AC008746.3	0.40426	0.19768	0.34105	0.46116	0	0.85614
AC008746.5	4.6594	2.8907	3.0486	2.6599	0	4.2185
AC008746.9	0	0	0	0	0	0
AC008747.1	0	0	0	0	0	0
AC008749.1	1.1538	1.7614	1.4444	1.1646	1.9519	1.3527
AC008751.1	0	0	0	0	0	0
AC008751.3	1.1414	1.2936	1.1161	0.44286	0.36408	1.6917
AC008753.3	1.332	0.9937	0.9921	1.7507	1.8005	0.40351
AC008753.6	1.1183	1.715	1.8038	9.1681	0.88222	3.4091
AC008759.1	0.43956	0.49588	0.45714	0.64331	0.11432	0.77005
AC008764.2	5.6089	4.0129	3.8042	7.213	2.8001	4.2844
AC008781.2	0.14741	0.0077005	0.02067	0.1068	0	0.21733
AC008781.7	0	0.14118	0	0	0.40893	0
AC008794.1	0	0	0	0	0	0
AC008806.2	0	0.025669	0	0	0	0
AC008813.1	0	0	0	0	0	0
AC008813.2	0	0	0	0	0	0
AC008829.1	0	0	0	0	0	0
AC008834.1	0	0	0	0	0	0
AC008834.2	0	0	0	0	0	0
AC008836.1	0	0	0	0	0	0
AC008850.3	0	0.046204	0	0	0	0
AC008865.1	0	0.67006	0.010334	0.57316	0	0.33367
AC008865.2	0	0	0	0	0	0
AC008869.1	0	0	0	0	0	0
AC008870.1	1.2737	0.59807	0.85289	1.1828	0.92448	2.3724
AC008872.1	0	0	0	0	0	0
AC008888.1	0.1525	0.053901	0.085247	0.0052107	0	0.20432
AC008894.1	0.34551	0.25931	0.42105	0.24773	1.0796	0.84873
AC008895.1	0	0	0	0	0.0053107	0
AC008915.1	0	0	0	0	0	0
AC008937.2	0.58206	0.54428	0.21185	0.56784	0.35315	0.35956
AC008937.3	0.11435	0	0.12659	0.28135	0.18588	0.37257
AC008940.1	0.15758	0	0	0	0	0
AC008946.1	0	0	0	0	0	0
AC008949.1	0	0	0	0	0	0
AC008962.1	0	0	0	0	0	0
AC008967.1	0	0	0	0	0	0
AC008977.1	0	0	0	0	0	0
AC008984.2	0.98383	0.27197	0.58374	1.8525	8.1795	0.69897
AC008984.5	0	0	0	0	0.10101	0
AC008984.6	0.67351	0	0	0	0	0
AC008984.7	0	0	0	1.5031	5.672	0
AC008993.1	17.803	11.845	16.082	21.563	13.876	15.216
AC009002.1	0.29737	0.10271	0.33071	0.16411	0.39334	0.27173
AC009009.1	0	0	0	0	0	0
AC009021.1	0	0	0	0	0	0
AC009028.1	0	0	0	0	0	0
AC009041.1	0	0	0	0	0	0
AC009041.2	0	24.507	23.47	0	0	0
AC009041.3	0.17538	0.18236	0.19893	0.17715	0.066403	0.21741
AC009052.1	0.65099	0.57747	1.2014	0.7686	0.34791	1.0397
AC009060.1	1.1302	0.71097	0.95641	1.1698	0.077055	0.95918
AC009061.1	0	0	0	0.23709	0.93478	0.085351
AC009065.1	0	0.082147	0.27387	0	0	1.3942
AC009065.2	0	0	0	0	0	0
AC009065.3	2.7028	0.96309	1.3719	1.4356	1.0118	2.3597
AC009069.1	0.012709	0.010269	0.020666	0.02084	0.023911	0.020695
AC009075.1	0.46769	0.15658	0.22992	0.13546	0	0.23022
AC009086.2	10.009	8.1651	8.8855	8.5286	2.6358	21.164
AC009086.3	0.74471	2.0586	2.2549	1.2896	0.30022	6.2059
AC009093.1	0.44471	0.70332	0.40567	1.5294	0.98783	2.4806
AC009095.4	1.0909	0.6957	1.1212	0.46371	0.89786	1.8806
AC009102.1	0	0	0.041333	0	0	0
AC009108.1	0	0	0	0	0	0
AC009110.1	0	0	0	0	0	0
AC009113.1	0.02542	0.96798	0.11626	0.26313	0	0
AC009113.2	0.48307	0.49539	0.42102	0.37776	0.4168	0.64333
AC009116.1	1.3574	0.96533	0.28676	0.028656	0	0.1785
AC009118.1	0.061006	0.061611	0.072329	0	0	0
AC009119.1	0.70153	0.27214	0.33325	0.52362	0.35859	0.95715
AC009119.2	0	0	0	0	0	0
AC009120.1	0	0	0	0	0	0
AC009120.3	2.6596	1.1629	0.71059	1.1699	0.97722	3.9092
AC009121.1	0	0	0	0	0	0
AC009127.1	1.4673	1.6378	2.2735	2.1934	4.5151	2.1734
AC009133.2	11.215	2.5553	2.4405	0.2188	1.1153	5.4337
AC009133.3	0.96344	0.82932	0.8268	0.59936	0.90508	1.4995
AC009158.1	0	0	0	0	0	0
AC009159.1	0	0	0	0	0	0
AC009161.1	0	0	0	0	0	0
AC009171.1	0.63305	1.3534	0.90707	0.33867	0.2071	0.93397
AC009196.1	0	0	0	0	0	0
AC009223.2	0	0	0	0	0	0
AC009226.1	0	0	0	0	0	0
AC009227.2	0.1118	0.06161	0.041337	0.078164	0.15934	0.1449
AC009227.3	0	0	0	0	0	0
AC009228.1	1.9518	1.3118	1.54	1.3445	1.6783	1.2778
AC009229.5	0	0	0	0	0	0
AC009229.6	0	0	0	0.33865	0	0
AC009234.1	0.12455	0	0.10593	0	0	0.10863
AC009236.2	0	0	0	0	0	0
AC009237.10	0	0	0	0	0	0
AC009237.11	0	0	0	0	0	0
AC009237.13	0	0	0	0	0	0
AC009237.14	0	0	0	0	0	0
AC009237.16	0	0	0	0	0	0
AC009237.17	0	0	0	0	0	0
AC009237.2	0	0	0	0	0	0
AC009237.4	0	0	0	0	0	0
AC009237.5	0	0	0	0	0	0
AC009237.6	0	0	0	0	0	0
AC009237.8	0.54946	0.20537	0.13175	0.010421	0	0.32377
AC009238.6	0	0	0	0	0	0
AC009238.7	0	0	0	0	0	0
AC009238.8	0	0	0	0	0	0
AC009245.3	0.23388	0.16173	0.12918	0.18757	0	0.19135
AC009262.2	0	0	0	0	0	0
AC009263.2	0	0	0	0	0	0
AC009264.1	0.0025419	0	0	0	0	0
AC009269.1	0	0	0	0	0	0
AC009274.6	0	0	0	0	0	0
AC009276.4	0	0	0	0	0	0
AC009297.1	0	0	0	0	0	0
AC009299.1	0	0	0	0	0	0
AC009299.2	0.39373	0.56741	0.89116	0.17455	0.58437	0.40093
AC009299.3	1.5119	1.6044	2.0417	0.40907	0.13276	0.7864
AC009299.4	0.11694	0	0	0	0	0
AC009299.5	0	0	0	0	0	0
AC009302.2	0	0	0	0	0	0
AC009303.1	0	0	0.074923	0	0	0
AC009303.3	0.56164	0.4416	0.35394	0.65394	0	0.68542
AC009305.1	0	0	0	0	0	0
AC009310.1	0	0	0	0	0	0
AC009311.2	0	0	0	0.018237	0.31869	0
AC009312.1	0	0.14633	0.015503	0	0	0
AC009313.1	0	0	0	0	0	0
AC009313.2	0	0	0	0	0	0
AC009318.1	1.8604	1.671	1.5062	0.24489	1.7539	1.8871
AC009336.1	0	0	0	0	0	0
AC009358.1	0	0	0	0	0	0
AC009362.2	0	0	0	0	0	0
AC009365.4	0	0	0	0	0	0
AC009402.1	4.3469	1.9334	2.3122	3.7288	4.7959	4.8987
AC009403.2	4.6238	3.5215	4.6767	4.5039	12.923	3.2142
AC009404.2	0.78816	0.31831	0.58374	0.98516	0.64031	3.7995
AC009410.1	0	0	0	0	0	0
AC009411.1	0	0	0	0	0	0
AC009411.2	0	0	0	0	0	0
AC009413.2	0	0	0	0	0	0
AC009413.3	0	0	0	0	0	0
AC009414.1	0	0	0	0	0	0
AC009464.1	0	0	0	0	0	0
AC009473.1	0.72979	0.38767	0.3151	0	0.20459	0.67199
AC009474.1	0	0	0	0	0	0
AC009474.2	599.44	254.22	367.7	353.73	85.02	457.56
AC009477.7	0	0	0	0	0	0
AC009478.1	0.48286	0.18997	0.23765	0.27356	0.30802	0.50451
AC009480.3	0	0	0	0	0	0
AC009480.4	0	0	0	0	0	0
AC009484.1	0	0	0	0	0	0
AC009487.4	0	0	0	0	0	0
AC009487.5	0	0	0	0	0	0
AC009487.6	0.04068	0.069316	0.074935	0.036476	0.44147	0.14486
AC009494.3	0	0	0	0	0	0
AC009495.1	0	0	0	0	0	0
AC009495.2	1.3466	0.32088	2.4756	1.1228	5.1326	6.0828
AC009495.3	0.63035	0.38759	0.36431	0.30745	0.074413	1.0296
AC009495.4	0.44228	0	0	0	0.19117	0.95185
AC009498.1	0	0	0	0	0	0
AC009500.2	0	0	0	0	0	0
AC009501.4	0.46794	0.16168	0.18597	0.21364	0.24163	0.26118
AC009502.1	0	0	0	0	0	0
AC009502.3	0	0	0	0	0	0
AC009502.4	0	0	0	0	0	0
AC009505.1	0.94305	1.1192	1.7544	0	0.7596	0.92595
AC009505.2	10.623	7.5509	5.4226	1.6361	4.386	2.7727
AC009505.4	0	0	0	0	0	0
AC009506.1	0.26436	0.06417	0.15759	6.257	25.625	0.26396
AC009506.2	0	0	0	0	0	0
AC009508.1	0	0	0	0	0	0
AC009517.2	0	0	0	0	0	0
AC009518.2	0	0	0	0	0	0
AC009518.3	0	0	0	0	0	0
AC009518.4	0.071166	0.094989	0.012916	0	0	0.12669
AC009518.8	0	0	0	0.02084	0	0.28454
AC009520.1	0	0.0051345	0	0	0	0
AC009531.2	0	0	0	0	0	0
AC009541.1	0	0	0	0	0	0
AC009542.1	0	0	0	0	0	0
AC009542.2	0.19818	0.23616	0.14471	0.27878	1.1715	0.35203
AC009570.1	3.289	0.78586	1.3202	3.0433	0.053115	1.4346
AC009677.1	0	0	0	0	0	0
AC009690.1	2.5848	0.91879	0.6355	2.53	0.33491	2.2606
AC009690.2	0.47784	0.4929	0.32296	0.57072	0.9167	1.6895
AC009704.1	0.12962	0.10267	0.10596	0.16934	0.23385	0.21479
AC009711.1	0	0	0	0	0	0
AC009712.1	0	0	0	0	0	0
AC009712.2	1.1762	0.37184	0.67689	6.2001	1.4791	1.0633
AC009729.1	0	0	0.043917	0	0	0.18629
AC009779.1	0	0	0	0	0	0
AC009784.1	0	0	0	0	0	0
AC009784.3	0.22368	0.29781	0.42106	0.11983	0	0.89755
AC009784.4	0	0	0	0	0	0
AC009785.1	0	0	0	0.12506	0.20446	0
AC009835.1	0	0	0	0	0	0
AC009878.2	0	0	0	0	0	0
AC009892.10	0.72696	0	0	0	0	0
AC009892.2	0	0	0	0	0	0
AC009892.5	0	0	0	0	0	0
AC009892.9	0	0	0	0	0	0
AC009945.4	0	0	0	0	0	0
AC009947.2	0	0	0	0	0	0
AC009947.4	0	0	0	0	0	0
AC009947.5	0	0	0	0	0	0
AC009948.5	3.0107	2.396	3.1912	3.7954	0.7223	2.1534
AC009948.7	0.26688	0.17458	0.38753	0	0	0
AC009950.1	0.34818	0	0	0	0.071688	0.36472
AC009950.2	21.195	2.2106	2.6245	6.2682	37.257	7.8137
AC009951.1	0.32787	0.22848	0.248	0.73731	0.24189	0.5279
AC009951.2	4.0769	1.5842	1.8602	4.4082	4.934	4.2416
AC009955.8	0	0	0	0	0	0
AC009960.1	0.27444	0	0	0	0	0
AC009960.2	0.25422	0	0	0	0	0
AC009960.3	0.18298	0	0	0	0	0
AC009960.4	0.19314	0	0	0	0	0
AC009960.5	0.24395	0	0	0	0	0
AC009960.6	0	0	0	0	0	0
AC009960.7	0.34567	0	0	0	0	0
AC009961.2	0.1652	0.13606	0.13951	0.11462	0.30549	0.27166
AC009961.3	1.2384	0.52625	1.5217	1.3213	4.0572	2.19
AC009961.5	0	0	0	0	0	0
AC009963.3	17.123	0	10.204	7.2291	14.99	12.572
AC009963.4	0	0	0	0	0	0
AC009963.5	0	0	0	0	0	0
AC009963.6	0	0	0	0	0	0
AC009964.1	0	0	0	0	0	0
AC009965.1	0	0	0	0	0	0
AC009965.2	0	0	0	0	0	0
AC009967.1	0	0	0	0	0	0
AC009967.2	0	0	0	0	0	0
AC009967.3	0.94054	0.43113	0.7828	0.72937	1.5374	0.88466
AC009967.5	0.49314	0.34141	0.47798	0.2657	0	0.95968
AC009969.1	0	0	0	0	0	0
AC009970.1	2.1173	0	0	0.39344	0	0
AC009973.1	0	0	0	0	0	0
AC009987.1	0	0	0	0	0	0
AC009997.1	0	0	0	0	0	0
AC010082.1	8.0604	0.16686	0.75422	7.5656	1.6411	1.3137
AC010082.2	0	0	0	0	0	0
AC010084.1	0.38129	0.39534	0.36166	0.29439	1.2192	0.57418
AC010086.1	1.0801	0	0	0	0.031864	0
AC010086.2	0	0	0	0	0	0
AC010086.5	0	0	0	0	0	0
AC010087.1	0	0	0	0	0	0
AC010091.1	0	0	0	0	0	0
AC010095.6	0	0	0	0	0	0
AC010095.7	0	0	0	0	0	0
AC010096.1	0	0	0	0	0	0
AC010096.2	0	0	0	0	0	0
AC010105.1	0	0	0	0	0	0
AC010127.3	0.24147	0.18735	0.21192	0.21892	0.55506	0.31282
AC010127.4	0	0	0	0	0	0
AC010132.10	0	0	0	0	0	0
AC010132.11	0	0	0	0	0	0
AC010133.1	0	0	0	0	0	0
AC010136.2	1.1695	0.47748	0.51931	0.63043	1.8545	1.3453
AC010137.2	0	0.017973	0.051674	0	0	0.16037
AC010141.1	0	0	0	0	0	0
AC010141.4	0	0	0	0	0	0
AC010141.6	0	0	0	0	0	0
AC010141.8	0	0	0	0	0	0
AC010145.4	0	0	0	0	0	0
AC010146.1	0	0	0	0	0	0
AC010146.2	0	0	0	0	0	0
AC010148.1	0.20333	0.15662	0.13176	0.067737	0.079657	0.2845
AC010149.4	0.6329	0	0	0	0	0
AC010150.1	0.18049	0.23618	0	0.27358	0.33191	0.24836
AC010150.2	0	0	0	0	0	0
AC010153.3	0	0	0	0	0	0
AC010154.2	0	0	0	0	0	0
AC010170.1	0	0	0	0	0.01328	0
AC010173.1	0	0	0.054259	0	0	0
AC010176.1	0	0	0	0	0	0
AC010203.1	0	0	0	0	0	0
AC010207.1	0	0	0	0	0	0
AC010207.2	0	0.13605	0.025839	0	0.54156	0.023286
AC010209.1	0	0	0	0	0	0
AC010223.1	0	0	0	0	0	0
AC010226.4	1.6871	1.2502	1.8937	1.4514	0.74635	4.0722
AC010240.2	0.11693	0.082149	0.093008	0.10682	0.1568	0.18103
AC010240.3	0	0	0	0	0	0
AC010243.1	0	0.42614	0.033589	0.15892	0	0.39576
AC010245.1	0.094048	0.12579	0.077509	0	0	0.27159
AC010247.1	3.3915	1.72	1.0404	2.5145	0.2551	2.6825
AC010295.1	0	0	0	0	0	0
AC010296.1	0.0050834	0	0	0.020842	0	0.015518
AC010297.1	0	0	0	0	0	0
AC010301.1	0	0	0	0	0	0
AC010319.1	0	0	0	0	0	0
AC010323.1	1.4185	1.4606	2.1625	1.4823	2.9898	2.0819
AC010325.2	0	0	0	0	0	0
AC010326.1	2.2123	1.2346	1.7986	1.6071	4.8062	2.5456
AC010326.2	3.8465	1.9508	1.4157	3.1754	7.3701	4.1395
AC010326.3	2.0518	1.8197	1.7472	1.9648	3.765	3.6639
AC010326.4	0.66638	0.24649	0.42127	0.34392	0.54206	0.83095
AC010326.5	1.1718	0.87549	0.66392	0.74259	0.643	1.8934
AC010326.6	0	0	0	0	0	0
AC010327.1	0.053377	0.033368	0.074914	0.072936	0	0.13708
AC010327.2	0.34565	0.1977	0.13435	0.14589	0.46245	0.46554
AC010328.1	0	0	0	0	0	0
AC010328.2	1.1541	0.53388	0.46233	0.72414	2.1092	1.5682
AC010329.1	0.44216	0.13346	0.10855	0.091197	0.69081	0.58197
AC010332.1	2.3386	0.69828	0.63826	0.32046	0.24194	1.022
AC010333.1	1.3548	1.2737	0.9661	1.1098	0.44343	0.28719
AC010368.1	0	0	0	0	0	0
AC010376.1	0	0	0	0	0	0
AC010422.1	0	0	0	0	0	0
AC010422.2	0	0	0	0.20061	0	0
AC010441.1	0.043208	0.30291	0.49357	1.1	1.6429	1.1009
AC010455.1	0	0	0	0	0	0
AC010458.1	0	0	0	0	0	0
AC010468.1	0.20592	0.17969	0.16794	0.085977	0	0.16037
AC010468.2	0	0	0	0	0	0
AC010468.3	0	0	0	0	0	0
AC010487.2	0	0	0	0	0	0
AC010487.3	0	0	0	0	0	0
AC010487.4	0.29229	0.084728	0.26612	0.10942	0	0
AC010491.1	5.3078	2.4023	2.9521	3.4421	3.474	6.4603
AC010492.2	0.14489	0.097558	0.18602	0.42985	1.7688	0.22507
AC010492.4	0	0	0	0	0	0
AC010492.5	0	0	0	0.14594	0.28681	0
AC010506.1	1.975	0.85731	1.3741	0.37771	0.32135	3.4841
AC010507.1	1.7162	1.6938	3.2167	17.29	336.08	1.4959
AC010507.2	1.5911	2.0179	1.7391	7.8805	38.72	1.384
AC010518.3	0	0	0	0	0	0
AC010522.1	3.444	3.4834	3.9186	0.8752	1.4924	7.3607
AC010525.1	1.413	0.68569	0.68209	0.70867	0.89213	0.92605
AC010531.2	0	0	0	0	0	0
AC010536.1	2.1467	1.0215	1.7382	1.8599	0.45172	18.041
AC010546.1	0	0	0	0	0	0
AC010547.1	0	0	0	0	0	0
AC010591.1	31.093	55.153	46.356	53.575	27.478	20.825
AC010602.1	0	0	0	0	0	0
AC010602.2	0	0	0	0	0	0
AC010606.5	0	0	0	0	0	0
AC010609.1	0	0	0	0	0	0
AC010609.2	0	0.81125	1.6251	0	0	2.6466
AC010609.3	2.3689	0.78785	0.76229	1.8943	1.0177	2.7366
AC010615.1	0.91507	0.59566	0.47531	0.47681	1.0495	0.96783
AC010615.2	0.689	0.37992	0.6253	0.76345	2.6458	0.4135
AC010615.3	0.17281	0.046214	0.072352	0.075558	0.25236	0.20436
AC010616.1	2.6934	9.1276	7.4446	0	0	1.8854
AC010616.2	0.48034	0.12593	0.30224	0.46372	0.79437	0.43191
AC010623.1	0.64316	0.27722	0.12146	0.26321	0.23366	0.34143
AC010627.1	0.34568	0.33887	0.38229	0.27621	0	0.28451
AC010632.1	0.72984	0.71624	0.22484	1.0864	1.7664	1.3092
AC010643.1	0.50615	0.26702	0.28422	0.4507	1.2487	0.80202
AC010646.1	0	0	0	0	0	0
AC010655.1	0.10419	0	0	0	0	0
AC010674.1	2.1776	0.91426	0.69262	0	0.06905	0.64889
AC010677.5	0	0.071867	0	0	0	0
AC010679.2	0.78301	0.31578	0.42884	0	0	1.288
AC010680.1	0.63028	0.40306	0.58641	0	0	0.44489
AC010723.1	0	0	0	0	0	0
AC010724.1	0	0	0	0	0	0
AC010724.3	3.1217	2.5569	2.2108	0.11204	0.045154	3.5157
AC010724.4	0.62258	0.45417	0.53209	0.054715	0	0.481
AC010724.5	0.033044	0.08215	0.05684	0	0	0.10346
AC010724.6	0	0.046204	0	0	0	0
AC010724.7	0	0	0	0	0	0
AC010724.8	0	0	0	0	0	0
AC010729.1	0	0	0	0	0	0
AC010729.2	0	0	0	0	0	0
AC010729.3	0	0	0	0	0	0
AC010731.2	0	0.30294	0	0	0	0
AC010731.3	0	0	0	0	0	0
AC010731.4	0	0	0	0	0	0
AC010731.6	0	0	0	0	0	0
AC010733.1	0	0	0	0	0	0
AC010733.2	3.513	0.43097	0.61725	2.6729	2.3347	3.4007
AC010733.5	6.2341	1.1865	1.9371	3.7075	4.7745	3.2293
AC010739.1	0	0	0	0	0	0
AC010740.1	0	0	0	0	0	0
AC010744.1	0	0	0	0	0	0
AC010745.1	0	0	0	0	0	0
AC010745.2	0	0	0	0	0	0
AC010745.3	0	0	0	0	0	0
AC010745.4	0	0	0	0	0	0
AC010746.3	0.15756	0.053915	0.13691	0	0.79942	0
AC010754.1	0	0	0	0	0	0
AC010761.1	0	0	0	0	0	0
AC010761.2	0	0	0	0	0	0
AC010761.3	3.5985	0.63921	0.73118	0	3.8704	5.2455
AC010789.1	1.3395	0.2285	0.57856	0.64607	0.53909	0.69832
AC010849.1	0	0	0	0	0	0
AC010853.1	0	0	0	0	0	0
AC010874.1	0	0	0	0	0	0
AC010878.3	0	0	0	0	1.1552	0
AC010880.1	0	0	0	0	0	0
AC010883.5	4.3738	1.6939	2.7325	1.7011	3.3427	1.2497
AC010884.1	0	0	0	0	0	0
AC010886.2	0.081341	0.033375	0.072336	0.046902	0.23896	0.13967
AC010887.1	0	0	0	0	0	0
AC010888.1	0	0	0	0	0	0
AC010889.1	2.0867	0.12064	0.78005	1.274	0	2.1592
AC010890.1	0	0	0	0	0	0
AC010891.2	0	0	0	0	0	0
AC010894.3	0.8363	0.39285	0.53213	1.5213	1.2968	0.57157
AC010894.4	0	0	0	0	0.46745	0
AC010894.5	0.27193	0	0.20667	0.32566	0.55242	0.79152
AC010899.1	0.71172	0.54421	1.2427	1.4147	0.47526	1.2132
AC010900.2	0.13214	0.12322	0.12398	0.1563	0	0.31304
AC010904.1	0	0	0	0	0	0
AC010907.2	0.18298	0.21825	0.2558	0.12765	0.41422	0.26375
AC010907.5	0	0	0	0	0	0
AC010913.1	0.061012	0.02054	0.046502	0.072944	0	0.031043
AC010928.1	0	0	0	0	0	0
AC010928.2	0	0	0	0	0	0
AC010930.1	0	0	0	0	0	0
AC010967.1	0	0	0	0	0	0
AC010967.2	0	0	0	0	0	0
AC010967.3	0	0	0	0	0	0
AC010969.1	0.030503	0.030807	0.031004	0.031264	0.055765	0.041394
AC010970.1	0	0	0	0	0	0
AC010970.2	798.09	1357.4	1220.8	2089.6	579	1227.2
AC010971.1	0	0	0	0	0	0
AC010974.3	0	0	0	0	0	0
AC010975.1	0	0	0	0	0	0
AC010975.2	0	0	0	0	0	0
AC010976.1	0.068623	0.043648	0.05684	0.10682	0.077027	0.13193
AC010976.2	0.52858	0.59832	0.6044	0.58102	0.75424	0.7708
AC010980.2	0	0	0	0.45592	0	0
AC010982.2	0	0	0	0	0	0
AC010983.1	0	0.010268	0	0	0	0
AC010987.5	0	0	0	0	0	0
AC010987.6	0	0	0	0	0	0
AC010990.1	0	0	0.025839	0.062536	0.10892	0.025856
AC010997.1	0	0	0	0.60948	0	0
AC010997.2	0	0	0	0.085981	0	0
AC010999.1	0	0	0	0	0	0
AC010999.2	0.76751	0.56963	0.92996	1.1624	1.0845	0.79272
AC011005.1	0.55897	0.25164	0.51434	0.5315	0.64006	0.60624
AC011005.2	0	0	0	0	0	0
AC011037.1	0.076248	0.12834	0.12662	0.13287	0.15683	0.41627
AC011193.1	0	0	0	0	0	0
AC011195.1	0	0	0	0	0	0
AC011196.3	0	0	0	0	0	0
AC011225.1	0	0	0	0	0	0
AC011233.2	0	0	0	0	0	0
AC011239.1	0	0	0	0	0	0
AC011242.5	0	0	0	0	0	0
AC011243.1	0	0	0	0	0	0
AC011247.3	0	1.9636	1.7024	1.1934	0.23924	0
AC011284.3	0	0	0	0	0	0
AC011286.1	0	0	0	0	0	0
AC011288.2	1.3875	1.3684	1.4052	0.88053	2.6878	1.0661
AC011290.4	0	0	0	0	0	0
AC011290.5	0.68626	0.49806	1.1652	0.15894	0	0.86906
AC011294.3	0.096588	0.095012	0.13694	0.054716	0.11956	0.15257
AC011295.1	0.033044	0.08215	0.05684	0	0	0.10346
AC011295.2	0.62258	0.45417	0.53209	0.054715	0	0.481
AC011295.3	0	0.046204	0	0	0	0
AC011295.4	0	0.4133	0.17311	0	0	0
AC011295.5	1.1667	0.74687	0.70301	0.08597	0.0079681	1.0504
AC011298.2	0	0	0	0	0	0
AC011306.1	0	0	0	0	0	0
AC011317.1	0	0	0	0	0	0
AC011322.1	14.58	9.3679	16.59	6.7605	3.527	36.25
AC011330.12	0	0	0	0	0	0
AC011330.5	1.7517	0.73682	0.52713	0.43766	0.0026565	1.7952
AC011343.1	0	0	0	0	0	0
AC011347.1	0	0	0	0	0	0
AC011363.1	0	0	0	0	0	0
AC011366.3	0	0	0	0	0	0
AC011374.1	0	0	0	0	0	0
AC011374.2	0	0	0	0	0	0
AC011374.3	0	0.043645	0	0.036475	0	0.095703
AC011383.1	0	0	0	0	0	0
AC011385.1	0	0	0.067178	0.76861	0.555	0
AC011385.2	3.4727	3.0914	3.9835	3.9913	7.5261	5.5692
AC011388.1	0	0	0	0	0	0
AC011406.2	0	0	0	0	0	0.55872
AC011407.1	0	0	0	0	0	0
AC011431.1	0	0	0	0	0	0
AC011442.1	0.70152	0.94474	0.99479	0.76864	0	0.96747
AC011444.1	0	0	0	0	0	0
AC011447.1	0	0	0	0	0	0
AC011447.2	0.39397	0.1053	0.14726	0.15892	0.33232	0.31559
AC011452.1	0.18803	0.092481	0.16532	0.21885	0.53909	0.30248
AC011453.1	0	0	0	0	0	0
AC011455.1	0	0	0.012919	0	0	0
AC011456.1	0	0	0	0	0	0
AC011456.2	0	0	0	0	0	0
AC011458.1	0.14746	0.13348	0.11112	0.10941	0.14873	0.20182
AC011460.1	0.93775	0.42103	0.90167	0.62528	0.75709	1.8956
AC011465.1	0	0	0	0	0	0
AC011466.1	0.81348	0.59044	0.45206	0.14589	0.49402	0.48073
AC011466.2	1.1184	0.41849	0.69251	0.82338	2.1652	0.74324
AC011467.1	0	0	0	0	0	0
AC011467.3	0	0	0	0	0	0
AC011468.1	0	0	0	0	0	0
AC011468.2	1.0677	0.49555	0.46257	0.53421	0.28704	1.6505
AC011468.3	0.7294	0.49544	0.36953	0.2918	0.30804	1.4856
AC011471.1	0.69635	0.20788	0.33055	0.28144	0.50487	0.56639
AC011475.1	0	0	0	0	0	0
AC011475.2	0	0	0	0	0	0
AC011476.1	1.3138	0.94693	1.2611	0.87794	0.69073	2.5601
AC011477.1	1.0634	1.5331	0.87332	0.16158	0.16462	1.1794
AC011477.2	0	0	0	0	0	0
AC011477.3	4.2066	1.2038	0.6174	0.65926	1.1689	3.5717
AC011478.1	0	0	0	0	0	0
AC011479.1	5.3548	0.87041	1.7852	0.5888	0	1.8599
AC011484.2	0.17536	0.13607	0.11882	0.072946	0.074355	0.15261
AC011487.1	0	0	0	0	0	0
AC011487.2	1.1947	1.2862	1.7748	0.39598	0	2.1054
AC011489.1	0	0	0	0	0	0.30255
AC011489.2	0.40928	0.20029	0.37209	0.26835	0.28972	0.35683
AC011491.1	0	0	0	0	0	0
AC011496.1	0	0	0	0	0	0
AC011498.2	0	0	0	0	0	0
AC011500.2	0	0	0	0	0	0
AC011503.1	0.34322	0.18739	0.15243	0.11462	0.10624	0.13972
AC011503.2	0	0	0	0	0	0
AC011508.1	0.35588	0.22847	0.20155	0.24229	0.62697	0.3154
AC011510.2	0	0	0	0	0	0
AC011515.2	0	0	0	0.87282	0	0
AC011518.1	0	0	0	0	0	0
AC011533.2	0.10168	0.3132	0.25581	0	0.11152	0.28711
AC011537.1	0	0	0	0	0.037198	0
AC011594.1	0	0	0	0	0	0
AC011603.1	0.71699	0.37988	0.92514	1.4195	1.3495	3.7711
AC011625.1	0	0	0	0	0	0
AC011626.1	0	0	0	0	0	0
AC011718.1	0	0.21821	0.10851	0.0521	0	0
AC011718.2	0	0	0	0	0	0
AC011718.3	0	0	0	0	0	0
AC011718.4	0	0	0	0	0	0
AC011718.5	0	0	0	0	0	0
AC011737.2	1.4388	0.88813	0.64048	1.9826	0.57887	2.533
AC011738.1	0	0	0	0	0	0
AC011738.4	0	0	0	0	0	0
AC011742.3	0.07119	0	0	0.38828	0	0.26383
AC011742.5	0	0	0	0	0	0
AC011747.3	0	0	0	0.17977	0.32694	0.1707
AC011747.4	1.3788	0.97781	1.3417	1.9415	5.0509	1.4134
AC011747.6	0	0	0	0	0	0
AC011748.1	0	0	0	0	0	0
AC011752.1	0	0	0	0	0	0
AC011753.5	0	0	0	0	0	0
AC011753.6	0	0	0	0	0	0
AC011754.1	0	0	0	0	0	0
AC011767.1	0	0	0	0	0	0.3104
AC011815.1	0.45482	0.41087	0.22985	0.18764	0.11696	0.39544
AC011816.1	0.45747	0.35429	0.40309	0.10942	1.243	1.1355
AC011840.1	0	0	0	0	0	0
AC011884.1	0	0	0	0	0	0
AC011893.3	0	0	0.051672	0	0	0
AC011897.2	0	0	0	0	0	0
AC011899.1	0	0	0	0	0	0
AC011899.10	0	0	0	0	0	0
AC011899.9	0.48293	0.023107	0.031005	7.1353	3.9021	0.42933
AC011901.2	0	0	0	0	0	0
AC011904.1	0.15762	0.077007	0.10338	0.054735	0.16747	0.12673
AC011912.1	0.10678	0.07695	0.16791	0.083374	0.095601	0.15784
AC011933.2	0.20844	0	0	0.51585	1.0309	0
AC011978.1	0	0	0	0	0	0
AC011994.2	0	0	0	0	0	0
AC011995.1	0	0	0	0	0	0
AC011995.2	0	0	0	0	0	0
AC011995.3	0	0	0	0	0	0
AC011997.1	0.060995	0.2927	0.20409	0	0	0.17589
AC011998.1	0	0	0	0	0	0
AC011998.2	0	0	0	0	0	0
AC011998.4	0	0	0	0	0	0
AC011999.1	0.16526	0.14633	0.12919	0.065124	0	0.15518
AC012005.1	0	0	0	0	0	0
AC012005.2	0	0	0	0	0	0
AC012044.1	2.7756	1.2403	1.4824	3.3736	0.90847	4.389
AC012047.1	0	0	0	0	0	0
AC012050.1	0	0	0	0	0	0
AC012065.4	0	0	0	0	0	0
AC012065.5	0.70661	0.53394	0.45731	0.35702	0.51778	0.66726
AC012066.1	0	0	0	0	0	0
AC012074.1	0.40673	1.0322	1.0773	0	0	0.74248
AC012074.2	0.58968	0.63421	0.71574	0	0	0.56397
AC012075.1	0	0	0	0	0	0
AC012075.2	0	0	0	0	0	0
AC012078.2	0	0	0	0	0	0
AC012085.2	0	0	0	0	0.071708	0
AC012119.1	0	0	0	0	0	0
AC012123.1	1.2077	0	0	0	0	0
AC012146.7	6.9294	4.1946	4.2461	0.97424	0	6.3031
AC012150.1	0	0	0	0	0	0
AC012154.1	0	0	0	0	0	0
AC012170.1	16.668	8.974	5.393	4.5848	1.222	5.4737
AC012170.2	0.04068	0	0.11109	0.24491	0	0.39316
AC012175.1	0	0	0	0	0	0
AC012181.1	0	0	0	0	0	0
AC012184.1	0.64037	0.63671	0.28651	0.82611	0.86091	0.94657
AC012215.1	0	0	0	0	0	0
AC012306.2	0	0	0	0	0	0
AC012307.2	0	0	0	0	0	0
AC012309.1	0.27962	0.15404	0.40567	0.10161	0.021253	0.47591
AC012309.4	0	1.5325	3.9555	0.47157	0.10899	1.8134
AC012313.1	0	0	0	0	0	0
AC012313.3	0.61003	0.25157	0.26604	0.15374	0.013275	0.29249
AC012313.4	0.8676	0.44144	0.72833	0.82106	2.128	0.55603
AC012314.1	0	0	0	0	0	0
AC012314.19	0	0	0	4.2702	3.5828	0
AC012314.2	0	0	0	0.22668	0.31356	0
AC012314.20	0	0	0	0.45846	1.0412	0
AC012314.21	0	0	0	0.16933	0.56557	0
AC012314.6	0.70158	0.60846	0.64858	0.56265	0	1.3424
AC012314.8	0.28423	0.30044	0.74663	0.20591	0.11964	1.0088
AC012318.2	0	0	0	0	0	0
AC012337.1	0.040664	0.030807	0.031001	0.020841	0	0.049139
AC012354.4	0	0	0	0	0	0
AC012354.6	0	0	0	0	0	0
[truncated: 47,905 more rows]
