# Supplementary material for: Simultaneous enumeration of cancer and immune cell types from bulk tumor gene expression data
Source: eLife journal article supplement (doi:10.7554/elife.26476), 2017-11-13
Supplement: supp [file elife-26476-supp-v1.zip › elife_poa_e26476_Supplementary_File_2.xlsx]

## Sheet: SupplFile 2A
Supplementary File 2A
Gene expression reference profiles built from tumor infiltrating cells obtained from TPM normalized single-cell RNA-Seq data
Gene	Bcells	CAFs	CD4_Tcells	CD8_Tcells	Endothelial	Macrophages	NKcells
A1BG	7.7521	4.4789	4.6702	5.02	0	3.4637	1.7426
A1BG-AS1	0.27272	28.988	6.7471	11.764	0	2.3658	8.9214
A1CF	0.94832	0.03625	0.4978	0.56538	0.2582	0.13695	0.25936
A2M	0.14435	184.45	2.9531	15.386	1575.2	418.67	8.9411
A2M-AS1	0	0.345	7.342	11.591	8.6042	0.35669	0.21549
A2ML1	1.7189	0.1075	1.9288	2.1233	3.2892	0.6667	1.9665
A2MP1	0.65511	0	0.98775	0.69157	0	0	3.7325
A4GALT	7.5809	42.796	0	0.0114	58.459	0	0
A4GNT	0	0	2.7766	0.037016	0	1.3448	0
AA06	0	0	0.15315	0.52702	0	0	0
AAAS	64.367	0	44.795	47.302	0	20.694	70.403
AACS	3.4549	0	6.4176	13.374	0	4.7997	28.605
AACSP1	0.45013	0.052499	0.54454	0.44389	1.3073	0.10976	0.55809
AADAC	0	159.13	0	0.1379	0	0	0
AADACL2	0.1174	0	0	0.1216	0	0	0
AADACL3	0.088544	0	0.20478	0.095909	0	0.064757	0
AADACL4	0	0	0.13448	0.024531	0	0	0
AADAT	0.022741	0.14875	0.40242	0.20511	0	2.7942	0.09226
AAED1	0	0.26875	0.41493	6.1181	0	0.020488	5.4111
AAGAB	19.329	37.451	38.714	40.709	20.409	14.718	27.87
AAK1	3.8891	4.05	23.014	17.165	12.469	7.1348	24.5
AAMDC	12.573	167.4	16.896	7.6632	122.68	51.128	1.741
AAMP	93.608	261.87	81.762	117.76	102.58	88.224	160.23
AANAT	0.10661	0	0.62656	0.46782	0	0.46207	0.034193
AAR2	42.235	103.01	44.724	48.527	26.075	29.311	80.898
AARD	7.1188	2.5625	8.5646	7.5664	2.4137	4.2732	6.4746
AARS	47.345	35.253	27.724	43.079	62.991	44.788	18.569
AARS2	16.585	18.219	19.674	29.68	8.4601	12.572	36.993
AARSD1	28.615	54.607	45.224	38.69	33.014	35.625	0.55388
AASDH	5.5106	4.3711	7.094	14.987	2.7392	7.1915	8.2941
AASDHPPT	27.447	15.63	22.463	51.695	9.0629	18.449	27.5
AASS	7.3424	24.188	2.404	6.8241	32.964	2.625	16.72
AATF	79.171	45.423	88.392	111.62	73.094	37.116	119.56
AATK	0	0	0.86459	0.22184	0	2.8641	0
AATK-AS1	0	0	0	0	0	0	0
ABAT	17.068	0	2.7931	5.9008	1.0274	3.671	15.663
ABCA1	17.609	8.2199	2.5414	0.50451	1.0291	97.915	7.4278
ABCA10	0.35047	3.4511	0.013394	0.13313	0	0.21257	0.1342
ABCA11P	6.6465	4.5375	6.737	10.174	6.6538	3.0837	8.6172
ABCA12	0	0	0.17473	0.074589	0	0.0031708	0.23969
ABCA13	0.35143	0.19001	0.40457	0.46394	0.60456	0.18902	0.92132
ABCA17P	0	0	0.064786	0.26318	0	0	0
ABCA2	0.044837	10.191	14.854	24.101	1.7364	1.9421	7.744
ABCA3	1.1009	0.30749	0.59315	1.0986	0.031818	0.15122	0
ABCA4	0	1.03	0.07188	0.054615	0	0	0.12581
ABCA5	10.79	0	8.7718	8.3532	0.64818	1.5803	15.219
ABCA6	16.05	26.989	0.0069092	0.026823	0.52	6.1547	0.82132
ABCA7	11.517	0.04	12.51	17.629	1.6091	3.6932	28.132
ABCA8	0	78.692	0.09861	0.047158	0	0.053536	0
ABCA9	8.1119	10.416	8.9721	9.9655	10.088	2.6131	8.5306
ABCB1	18.805	0.1575	7.8986	37.218	27.665	0	60.916
ABCB10	4.1547	19.268	4.4158	12.577	2.3346	2.0761	14.966
ABCB11	0	0	0.10466	0.040626	0	0.035244	0
ABCB4	17.687	0	0.40239	0.036421	11.462	4.3864	0
ABCB5	5.3216	1.7038	8.7889	18.394	1.2991	6.16	5.7034
ABCB6	1.1849	34.845	5.8764	5.318	38.754	6.2892	8.9102
ABCB7	20.475	15.144	9.6796	21.812	3.6819	8.9558	68.414
ABCB8	4.2796	33.503	2.853	8.7361	9.1601	8.267	0.65775
ABCB9	0	0	2.6758	1.444	19.573	0.13512	0
ABCC1	7.3807	2.6274	16.597	16.268	18.694	6.3941	10.751
ABCC10	22.032	20.996	29.572	27.866	8.3373	3.7357	17.838
ABCC11	0.041448	0	0	0.045056	0	0.072071	0
ABCC12	0	0	0.10224	0.15321	0	0	0
ABCC13	1.5082	0.46624	1.6832	1.7194	2.8291	0.70902	0.7355
ABCC2	0.3858	0	0.30577	0.63522	0	1.3612	5.7436
ABCC3	0.061932	0.94498	0	0.11852	24.151	9.228	0
ABCC4	5.2386	2.8276	6.0308	7.6673	5.3093	0.80217	0.11065
ABCC5	16.359	29.958	9.7672	13.539	21.837	41.696	13.673
ABCC5-AS1	0	0	0.58978	0.20251	0	0	0
ABCC6	0	0	0.45234	0.49408	0.54093	4.7623	2.9696
ABCC6P1	0	0	0.1	0.69457	0	0	0
ABCC6P2	0	0	0	0.65059	0	0	0
ABCC8	0.096929	0	0	0.050528	0	0.045365	0
ABCC9	86.371	42.642	88.969	116.48	27.207	29.415	77.868
ABCD1	2.3967	23.903	4.5907	7.7485	0	13.693	0
ABCD2	6.5615	0	5.7335	25.637	0	0	7.929
ABCD3	11.473	41.465	9.0672	21.251	47.808	8.3348	11.565
ABCD4	31.23	29.507	25.335	26.099	97.269	13.065	20.096
ABCE1	12.247	51.947	39.179	41.692	15.505	23.997	13.128
ABCF1	10.458	32.588	41.905	43.213	10.128	20.218	17.682
ABCF2	29.104	11.011	54.546	39.042	2.4965	26.661	24.782
ABCF3	9.9091	40.258	35.363	36.029	26.947	19.005	40.623
ABCG1	40.363	35.124	28.689	45.285	16.277	55.974	22.354
ABCG2	0.084839	0	0.21412	0.16884	0	0.24231	0
ABCG4	0	0	0	0.06055	0	0	0
ABCG5	0	0	0	0.10765	0	0	0
ABCG8	0	0	0.24109	0.092918	0	0	0
ABHD1	0	0	2.6202	0.35326	0	0.51768	8.0026
ABHD10	25.084	15.631	29.72	26.048	8.4537	14.083	22.618
ABHD11	37.436	12.282	32.968	45.54	21.114	34.674	27.191
ABHD12	0.038545	9.724	27.812	27.293	0.65454	94.314	0
ABHD12B	0.49853	3.2388	0.1414	0.70121	0	0.083169	0.32195
ABHD13	29.424	3.5862	20.951	13.971	30.476	12.695	8.8365
ABHD14A	20.836	35.841	41.693	60.9	25.286	14.718	64.437
ABHD14A-ACY1	0	6.0849	0	0.48307	0	1.087	0
ABHD14B	111.8	90.569	84.202	88.482	44.439	32.651	22.782
ABHD15	24.509	2.8188	11.642	16.517	7.9729	8.4117	28.965
ABHD16A	79.122	20.791	43.519	70.698	84.649	59.379	41.47
ABHD16B	7.6247	7.4939	0.83651	7.7079	1.3127	2.5162	12.061
ABHD2	7.9342	27.089	22	24.522	5.1192	19.881	18.249
ABHD3	38.091	10.322	84.06	84.36	0	33.866	30.658
ABHD4	38.903	10.404	8.1238	25.04	106.33	14.984	45.865
ABHD5	2.1275	8.6126	8.7421	5.2923	3.2872	16.075	9.6863
ABHD6	2.4063	0	16.614	15.338	10.2	8.2374	0
ABHD8	3.3346	1.765	9.3231	4.5255	2.9382	3.6882	0
ABI1	62.176	21.884	92.268	119.21	16.905	109.8	76.372
ABI2	10.386	10.476	16.397	20.197	5.6165	10.346	28.616
ABI3	26.194	0	18.824	101.95	130.81	83.989	241.1
ABI3BP	1.2911	97.063	0.17048	0.16815	0	0.0025608	0.025162
ABL1	10.256	17.97	9.7924	10.319	57.051	7.625	10.465
ABL2	4.1249	19.919	7.7863	9.3236	99.68	13.314	14.128
ABLIM1	54.91	46.078	53.907	39.414	70.427	0.097682	60.75
ABLIM2	0	13.963	1.0506	0.27635	22.912	0	0
ABLIM3	0	0	0.10352	0.045228	33.705	13.47	0
ABO	0	0	0.092121	0.2531	12.467	0.70766	0
ABP1	0	0	0.17619	0.074158	0	3.2907	0
ABR	22.583	28.776	36.834	32.595	24.315	31.729	13.759
ABRA	0	1.3625	0.14351	0.617	0	0.038292	0.021613
ABRACL	54.235	61.886	207.72	177.9	116.27	92.81	56.886
ABT1	47.955	28.755	78.43	80.888	42.698	33.734	46.798
ABTB1	53.298	31.12	50.965	39.076	20.988	12.384	159.45
ABTB2	0.34095	1.2875	1.1908	1.4277	0.20182	1.8314	0
ACAA1	88.08	78.703	101.03	116.34	104.23	116.71	114.56
ACAA2	30.077	122.6	59.391	71.33	83.53	85.682	284.51
ACACA	5.3201	3.66	7.8893	7.0194	0.73455	1.5808	8.1919
ACACB	1.8187	2.2986	3.3264	1.8772	5.6536	0.89204	4.1904
ACAD10	19.666	7.253	12.669	16.254	22.055	8.9633	2.7359
ACAD11	21.575	14.839	25.697	36.031	13.988	3.6825	88.101
ACAD8	9.1372	0	16.263	34.669	22.133	7.1271	65.236
ACAD9	17.045	19.921	16.528	27.478	7.8873	20.326	35.779
ACADL	0	5.2014	0	0	0	0	0
ACADM	48.175	55.419	32.208	55.371	22.413	27.47	63.22
ACADS	11.945	47.513	23.862	33.999	4.4136	20.026	0.12291
ACADSB	17.295	7.4886	24.252	24.456	9.8984	9.4311	18.637
ACADVL	75.991	332.56	116.58	146.61	141.31	108.97	156.76
ACAN	0	0	0.20727	0.44723	0	0.0017073	0
ACAP1	143.43	0.2975	192.42	203.82	0	14.67	166.89
ACAP2	22.585	6.1736	21.518	29.53	10.658	19.617	26.877
ACAP3	0.49497	10.546	1.6638	5.7588	7.8409	3.7671	0
ACAT1	45.7	114.23	55.663	26.249	74.794	45.553	35.953
ACAT2	56.767	45.352	43.399	51.187	77.373	12.601	144.03
ACBD3	2.2001	16.328	6.454	13.2	3.9756	17.687	5.1722
ACBD4	11.155	12.528	18.668	21.878	3.5938	8.3709	28.284
ACBD5	12.617	4.0739	20.19	25.313	2.7428	11.323	9.2254
ACBD6	38.046	32.449	39.992	47.043	94.935	25.244	9.6595
ACBD7	31.58	11.835	38.342	40.66	15.816	14.454	29.318
ACCS	19.942	19.304	15.828	11.02	5.6411	8.3553	1.341
ACCSL	0	0	0.097394	0.10959	0	0.078172	0
ACD	21.556	5.2589	20.218	29.052	35.916	8.688	8.2546
ACE	0.037901	9.2937	1.444	0.40687	35.497	5.7662	0
ACE2	0	0	0	0.2101	0	0	0
ACER1	0	0	5.3272	1.6971	0	0	0
ACER2	4.6807	1.5599	8.0896	0.57069	15.99	0.73619	0
ACER3	0.64721	0.76249	0.58767	4.0725	7.9121	18.447	6.6903
ACHE	0	0	0	0.39348	18.146	0	0
ACIN1	23.506	27.98	33.75	37.389	23.509	11.901	15.116
ACLY	34.075	50.047	58.389	83.036	41.106	28.08	111.31
ACMSD	0.046448	0	0.13788	0.045575	0	0	0.2613
ACN9	6.1878	3.8375	11.696	16.663	11.649	5.5212	5.0883
ACO1	6.8629	20.952	1.9661	4.8124	34.71	13.062	7.4942
ACO2	122.64	30.103	56.386	86.405	2.2445	70.353	35.416
ACOT1	0	3.0111	3.9074	4.505	12.304	3.3701	8.5998
ACOT11	0.074351	0	0.87713	0.11348	26.329	10.015	0.072259
ACOT12	0	0	0	0	2.8692	0.16963	0
ACOT13	20.349	5.621	21.225	19.857	12.419	18.683	4.9331
ACOT2	11.527	18.93	14.528	29.873	55.369	14.343	64.791
ACOT4	2.5122	0	13.79	6.6697	0	5.0265	43.546
ACOT6	0	0	0	0	0	0	0
ACOT7	10.529	65.128	59.42	43.417	32.388	10.555	38.894
ACOT8	50.748	49.594	42.308	51.834	71.289	39.463	0
ACOT9	41.612	137.85	69.977	46.767	68.324	75.602	17.184
ACOX1	10.312	8.1638	11.232	16.214	18.442	11.591	4.7721
ACOX2	0.55255	5.8613	0.11121	0.085831	0	0.54575	0
ACOX3	14.401	5.6965	15.366	23.093	6.4823	9.1129	4.1853
ACOXL	0.31515	0	0	0.096654	0	0	0
ACP1	60.815	119.17	83.758	117.99	90.911	50.785	200.3
ACP2	5.4918	95.018	24.306	30.036	48.712	123.66	1.9487
ACP5	315.02	0	204.42	146.08	12.447	273.28	74.75
ACP6	10.819	3.8187	4.1397	17.692	0	0.026098	0
ACPL2	0.080801	32.781	2.6344	14.732	0.61364	1.1472	47.232
ACPP	0.51046	0.0575	0.78147	0.53246	0	31.446	0.43582
ACPT	0	0	0.46696	0.098608	2.17	0	0
ACR	0	0	0	0.084163	0	0	0
ACRBP	2.487	0	0.44868	2.2186	0	18.642	0
ACRC	8.2924	0	2.7074	3.1384	0	0	0
ACRV1	0	0	0	1.3822	0	0	0
ACSBG1	0	0	0.064053	0.36686	0	0	0
ACSBG2	1.8408	0.41499	0	0.10664	0	0	0
ACSF2	12.444	0	9.7548	11.705	5.0501	14.175	0
ACSF3	39.59	7.331	26.098	17.802	51.542	8.5067	33.031
ACSL1	30.427	39.388	2.8234	21.745	12.806	168.58	8.8585
ACSL3	19.706	47.313	12.693	21.599	23.338	36.463	6.7826
ACSL4	8.6097	19.981	20.74	32.301	1.5409	33.529	5.9278
ACSL5	46.284	17.968	61.929	110.41	33.732	29.86	52.459
ACSL6	2.6105	1.3875	7.7158	9.1771	0.73819	1.7556	6.5556
ACSM1	0.47611	0	0.01297	0.049422	5.5365	0.14415	0
ACSM2A	0	0	0.062303	0.11723	29.003	0.018536	0
ACSM2B	0	0	0	0.035631	5.8164	0	0
ACSM3	1.4355	43.084	11.107	3.5401	0	0.23122	0.7852
ACSM4	0.34758	0	0	0.19477	0	0	0
ACSM5	0.64383	2.3237	0.088485	0.24402	0	6.769	0
ACSS1	54.948	2.3151	13.708	20.822	8.5759	4.3497	5.6375
ACSS2	0	26.063	12.667	0.48416	68.241	18.101	0
ACSS3	0.15031	1.205	0.37539	0.75731	0	0.084877	0.3813
ACTA1	0.025484	0.12875	0.29206	0.29463	0	3.757	0
ACTA2	15.709	478.88	41.622	78.762	0	2.6294	10.968
ACTB	6780.7	7317.8	10631	11849	3428.7	10275	13485
ACTBL2	0.13273	0	0.025097	0.021157	0	0.025731	0.33678
ACTC1	0.064188	0	0.35444	0.38403	0.05909	0.046585	0
ACTG1	2247.3	5585.2	3200.5	3392.8	4291.2	2297.6	4312.9
ACTG1P4	0.30128	1.8625	1.1618	1.8918	0.63364	0.49536	0.42488
ACTG2	0.031449	0	8.4232	0.21566	0	0.72001	1.1997
ACTL10	8.8119	0	0.053757	2.1414	0	3.0715	0
ACTL6A	115.04	50.263	41.323	83.626	27.315	31.134	49.878
ACTL6B	0	0	0.018666	0.0024303	0	0	0
ACTL7A	0	0	0.17503	0.20815	0	0	0
ACTL7B	0	0	0	0	0	0	0
ACTL8	0.75818	0	0.14018	0.88798	0	0	0
ACTL9	0	0	0.54915	0.0040101	0	0	0
ACTN1	2.1146	253.65	26.182	9.488	537.13	74.739	20.257
ACTN1-AS1	0	0	0	0.079032	0	0	0
ACTN2	0	0	0.1418	0.042476	0	0	0
ACTN3	0	0	0	0.047942	0	0	0
ACTN4	35.747	31.205	93.861	119.88	144.53	33.858	173.88
ACTR10	40.713	41.404	59.591	70.899	31.318	44.68	42.618
ACTR1A	33.707	81.065	72.133	64.109	113.99	78.769	159.45
ACTR1B	35.289	13.061	121.52	55.903	42.693	13.124	28.435
ACTR2	138.19	42.154	143.37	188.14	57.307	168.41	258.41
ACTR3	300.69	141.34	395.27	434.79	268.45	306.04	406.08
ACTR3B	4.9919	0	0.12374	4.8719	0	0.71012	0
ACTR3BP2	0	0	2.582	0.8807	0	0	0
ACTR3BP5	0	0	6.2839	1.4472	0	0	0
ACTR3C	16.103	0	8.1714	11.924	0	2.1616	0
ACTR5	10.129	7.2175	10.923	21.369	25.819	9.2801	30.352
ACTR6	31.386	16.436	34.629	52.488	14.188	14.792	18.182
ACTR8	10.778	13.746	11.948	15.543	27.069	6.6771	22.959
ACTRT1	0	0	0	0.17924	0	0	0
ACTRT2	0	0	0	0	0	0	0
ACTRT3	0	3.4087	0	7.5134	0	0	47.224
ACVR1	0.033869	22.885	10.585	5.9404	2.1154	5.1553	4.9048
ACVR1B	1.3834	0.515	1.9371	1.5003	0.87729	5.5526	7.7757
ACVR1C	0	0	1.0045	0.55838	0	0.013781	0
ACVR2A	3.5282	13.865	11.982	1.4373	2.6664	14.389	4.9108
ACVR2B	2.895	0	0.14047	0.91187	4.6948	0.22451	0
ACVR2B-AS1	2.3391	0.19875	3.8087	2.8626	0.095456	0.9712	2.521
ACVRL1	0.76657	0.091249	0.9117	0.76191	91.124	10.374	0.94229
ACY1	29.114	166.32	8.2285	15.189	0	37.23	0
ACY3	15.015	0	0	3.8282	0	0	0
ACYP1	11.642	27.632	33.308	31.053	0	8.008	8.952
ACYP2	23.485	7.7113	14.641	8.0328	12.105	7.8469	0.76874
ADA	25.866	88.767	32.666	84.391	97.009	61.874	75.372
ADAD1	0	0	0	0.11117	0	0	0
ADAD2	0.17563	0	4.2619	0.012199	0	0.25097	0
ADAL	0.80606	35.469	11.981	12.608	6.1318	11.513	8.2597
ADAM10	37.918	14.526	64.677	48.193	38.388	55.029	59.109
ADAM11	0	0	0.10025	0.034153	0	0.49708	0
ADAM12	0.069352	98.69	4.5989	1.1832	0	0.96417	0
ADAM15	6.1838	12.942	12.735	9.3338	641.43	53.82	3.3952
ADAM17	46.425	39.458	29.094	22.501	19.344	35.069	16.366
ADAM18	0	0	0.21394	0.63508	0	0	0
ADAM19	83.538	8.0349	62.652	12.258	15.315	20.586	3.8069
ADAM1A	8.9651	3.3874	8.2313	2.8319	0	0.11085	2.8048
ADAM2	0	0	0.13497	0.065938	0	0	0
ADAM20	0	0	2.3559	1.0276	0	0.10244	0
ADAM20P1	3.1088	0	0.40134	1.1764	0.92367	0	0
ADAM21	0	0	0	0.39061	2.7873	0	0
ADAM21P1	0	0	0	0.19559	0	0	0
ADAM22	0.096607	0	1.8686	2.4014	5.9711	0.12207	0
ADAM23	0	0	1.5928	0.086893	2.3282	0	0
ADAM28	385.89	0	0.087359	40.191	0	83.347	40.806
ADAM29	0	0	0.85787	0.08301	0	0	0
ADAM30	0	0	0.6554	0.44107	0	0	0
ADAM32	0	0	0	0.0198	0	0.53464	0
ADAM33	0.85093	97.439	1.1986	0.84585	0	0.40377	1.3662
ADAM3A	0	0	0.22164	0.22624	0	0	0.14065
ADAM5	0	0	0.10103	0.046674	0	0	0
ADAM6	0	0	0.53742	0.4838	0	0	0
ADAM7	0	0	0	0.44991	0	0	0
ADAM8	49.321	0.80374	75.553	87.815	0	16.579	159.75
ADAM9	5.3121	106.3	0.25189	1.378	4.1947	57.327	16.322
ADAMDEC1	1.7983	0	0.56249	0.85562	0	46.934	0
ADAMTS1	0.061288	39.778	0.056909	0.09772	220.92	0	23.823
ADAMTS10	0	6.6049	2.2704	0.45743	0.49273	0.25585	7.2573
ADAMTS12	0.62985	35.761	0.21206	0.26737	0	0.027805	0
ADAMTS13	0	0	0.18801	1.7232	0.23273	0.053291	0.62774
ADAMTS14	0	2.9475	0	0.38938	0	0	4.8252
ADAMTS15	0	10.679	0	0.01995	0	0.0028048	0
ADAMTS16	0.48014	0	0.041151	0.32429	0	0	0
ADAMTS17	2.495	0.45	1.8545	2.4093	1.0027	0.39707	2.0217
ADAMTS18	0	0	0.32715	0.045289	44.304	0	0
ADAMTS19	0.088384	0	1.0257	0.046929	0	0.028293	0
ADAMTS2	1.3185	167.07	1.0906	1.4746	0.50274	5.2666	1.5716
ADAMTS20	0	0	0.047394	0.11308	0	0	0
ADAMTS3	0	0	0.12685	4.5351	0	0	0
ADAMTS4	9.818	14.624	14.042	17.564	119.32	4.5557	13.49
ADAMTS5	0.099028	22.425	0.64179	0.22391	5.5256	0.0053658	0
ADAMTS6	2.2855	10.509	0.06964	1.3584	25.473	0	0
ADAMTS7	3.5222	2.2562	0.104	0.13994	4.1564	0.047439	0
ADAMTS8	0	0.2	0.348	0.19369	0	0	0
ADAMTS9	0.0045159	12.658	0.25897	0.030722	59.002	0.32388	0
ADAMTS9-AS2	0	0	0	0.24011	29.342	0	0
ADAMTSL1	0	13.728	0.36613	0.15838	107.04	0.019511	0
ADAMTSL2	1.0577	2.4613	2.3112	2.7721	51.742	1.4744	1.9362
ADAMTSL3	0	2.4637	0.053515	0.25154	0	0	0.12613
ADAMTSL4	0.025804	6.5015	2.5542	0.91844	0.97089	14.65	0
ADAMTSL5	0.55239	0.066249	3.5693	2.4038	0.9837	0.56389	0.42582
ADAP1	5.3155	0	11.829	12.98	0	9.5457	37.023
ADAP2	1.1064	0	0.74682	0.51491	13.484	136.21	0.29646
ADAR	57.705	54.694	96.285	104.79	47.146	36.137	111.16
ADARB1	4.5969	4.8424	4.5133	7.6652	12.247	0.9316	17.72
ADARB2	0.12677	0.02125	0.6373	0.3288	0.20273	0.11585	0.33646
ADARB2-AS1	0	0	0.40232	0.011385	0	0.018659	0
ADAT1	24.11	12.603	39.932	47.572	28.517	13.848	24.955
ADAT2	6.1867	0.95249	17.858	15.587	5.3464	1.6941	1.1113
ADAT3	7.6954	7.9684	9.9403	6.4346	0	1.5188	1.7733
ADC	0	30.569	4.6861	5.0778	0	2.6132	0
ADCK1	6.3372	0	0.17497	4.7976	2.3772	5.5038	0
ADCK2	8.6401	0	7.6871	3.5441	0	15.949	0
ADCK3	30.633	62.964	20.01	24.842	126.27	17.371	28.462
ADCK4	5.933	66.74	34.842	20.543	33.871	11.666	21.804
ADCK5	0.28225	18.701	15.675	17.599	6.4367	9.9246	0
ADCY1	0.48272	0.41751	0.94942	1.2353	3.2536	0.47035	0.58195
ADCY10	0	0	0.081817	0.1242	0	0	0
ADCY10P1	0.3861	0.40124	1.5042	1.1158	0	0.011586	9.3343
ADCY2	0.91398	0.73252	1.615	1.3522	0.38091	0.99257	1.7449
ADCY3	24.244	11.109	1.557	6.8872	5.4148	8.4247	0.5197
ADCY4	0	0.215	0.41704	3.3578	148.99	1.5944	0.26711
ADCY5	0	0	0.40037	0.19371	0	0.35767	0
ADCY6	2.3807	13.622	2.358	2.8517	26.562	1.0368	2.2223
ADCY7	23.255	7.6449	31.589	36.29	0.29364	28.918	50.124
ADCY8	0	0	0.31237	0.10916	0	0	0
ADCY9	0	4.2824	0.13225	0.50697	0	1.6906	0
ADCYAP1	0	0	0	0.0285	0	0	0
ADCYAP1R1	0	0	2.0269	0.35983	0	0.0057318	0.45195
ADD1	26.373	29.065	46.784	33.584	71.781	19.752	109.09
ADD2	9.3698	0	0.023515	0.18321	9.2277	3.5656	0.39611
ADD3	62.404	92.302	129.98	54.54	51.68	27.431	179.03
ADGB	0.3479	0	0.050789	0.046352	0	0	0
ADH1A	0.89364	0.083749	0.10515	0.045692	0	0.027805	0
ADH1B	0.31996	45.475	0	0.047557	0	1.2719	0
ADH1C	0	0	0.061754	0.020733	0	0	0
ADH4	4.4002	0.42749	6.8969	5.8993	2.6991	2.314	5.546
ADH5	95.896	57.744	69.204	66.947	59.061	37.23	44.401
ADH6	0	0	0.33231	0.50698	0	0.056343	0
ADH7	0	0	0.11734	0.028033	0	0.015976	0
ADHFE1	6.6603	0	11.426	22.545	15.857	6.7821	30.267
ADI1	24.846	78.692	74.041	30.731	24.064	54.233	71.039
ADIG	0	0	0	0.095515	0	0	0
ADIPOQ	3.0797	0.22874	3.6699	4.402	1.3054	1.4979	5.1688
ADIPOQ-AS1	1.0865	0	2.3712	1.3502	0.77638	0.79085	1.7291
ADIPOR1	135.88	86.806	93.491	92.495	69.119	148.23	16.253
ADIPOR2	10.873	3.4675	8.7464	6.1278	2.6372	9.7262	0.22711
ADIRF	0	96.807	1.267	0.2876	755.48	0.50183	0
ADK	37.678	29.354	26.956	20.404	9.2728	23.885	19.005
ADM	38.08	124.08	18.1	0.77902	73.984	412.34	0
ADM2	3.9494	0.29625	4.6425	3.7727	6.0882	1.6966	3.7714
ADM5	4.3576	0	2.2171	0.24205	20.748	0	0
ADNP	29.806	28.312	14.838	22.779	0.40091	6.0879	31.89
ADNP2	2.1111	0.1125	3.8599	7.7157	4.6229	3.0219	2.7466
ADO	1.0365	2.3887	4.2587	6.2633	0	6.1309	0.66973
ADORA1	0	1.2924	0.42146	0.16452	0	1.8596	0
ADORA2A	23.64	0.58001	46.189	120.21	6.6243	5.8358	2.4288
ADORA2A-AS1	1.4891	0	0.3903	2.1301	0.82727	1.0227	0.032902
ADORA2B	0.1987	0	2.0607	2.4248	0	0.28671	1.2397
ADORA3	0	0	0.7097	0.51357	0	139.61	0
ADPGK	82.828	40.527	62.762	77.103	118.67	124.9	106.86
ADPGK-AS1	22.215	5.6113	7.6107	5.0681	2.0546	1.4313	4.2123
ADPRH	36.848	10.26	19.013	14.066	12.58	14.447	0
ADPRHL1	0.011128	3.6212	0	0.047101	0	0	0
ADPRHL2	96.665	53.995	49.836	53.651	46.595	51.776	78.678
ADPRM	71.019	1.7874	27.228	32.641	9.0618	9.7444	0
ADRA1A	21.9	5.1424	27.681	33.864	20.309	8.2749	28.814
ADRA1B	0	0	1.3629	0.0059611	0	0	0
ADRA1D	0	0	0	0.020716	0	0	0
ADRA2A	0	3.9414	0	0.27928	0	0	0
ADRA2B	0	0	2.4197	1.1179	0	4.3203	0
ADRA2C	0	0	0	0.021312	0	0.010853	0
ADRB1	0	0	0	0.89343	0	0.80041	0
ADRB2	71.391	0	23.672	36.034	0	26.377	182.13
ADRB3	0	0	0.043212	1.7653	0	0.035487	0
ADRBK1	39.42	14.339	51.684	43.223	7.3191	33.505	55.769
ADRBK2	24.182	0.79375	7.3012	5.3989	0.51728	9.6349	1.3358
ADRM1	115.62	201.4	148.39	132.23	146.64	135.05	193.92
ADSL	37.913	82.207	178.39	95.994	44.574	42.75	69.733
ADSS	68.169	15.367	70.657	99.276	74.598	21.609	57.891
ADSSL1	0.56575	0	0	1.8927	7.0646	5.0569	0
ADTRP	4.9674	0	34.521	6.3395	0	10.803	0
AEBP1	0.68656	474.11	5.7413	1.826	24.156	3.4274	0
AEBP2	8.4717	2.7138	28.138	28.636	18.077	2.7487	4.1498
AEN	34.323	7.9111	35.456	20.754	55.91	10.186	41.294
AES	28.616	17.05	100.6	38.262	23.241	16.3	145.91
AFAP1	0	30.294	7.551	5.9194	23.515	0	0.1971
AFAP1-AS1	0.29466	0.02375	0.99378	0.18614	1.9963	0.43304	0.027741
AFAP1L1	0.15016	0.087499	0.80054	0.7177	70.75	0.44244	0.22259
AFAP1L2	0	0	2.6904	33.243	0	0.23878	7.2358
AFF1	7.9616	15.479	23.47	16.966	14.612	11.925	15.049
AFF2	0.040159	0	0.13958	0.20582	0	0.20475	0
AFF3	60.859	0.77874	4.468	5.3218	1.84	3.2498	7.006
AFF4	37.636	22.521	15.025	23.114	24.125	8.8805	38.446
AFG3L1P	26.603	3.9336	27.256	42.829	107	10.217	6.2232
AFG3L2	11.708	12.507	14.785	20.102	22.173	13.303	72.28
AFM	0	0	0	0.061043	0	0	0
AFMID	25.301	20.581	30.323	45.553	10.767	27.969	22.443
AFP	0	0	0	0.084875	0	0	0
AFTPH	86.966	0.58625	37.259	55.255	22.53	19.905	31.244
AGA	33.355	16.49	31.824	30.703	6.302	15.682	0
AGAP1	0.18644	0.44125	2.2165	1.5108	0	0.13976	0.34678
AGAP11	0.13532	3.3286	0.53375	0.89601	22.688	0.14464	0.95779
AGAP2	2.8546	3.2025	17.747	11.859	0	0.78276	13.82
AGAP3	0.036771	66.775	5.1024	5.8251	0.067269	11.103	10.504
AGAP4	0	0	0.87505	6.2148	0	0.77157	2.0755
AGAP5	0.74286	8.7488	2.1781	8.896	6.3185	2.3566	11.526
AGAP6	12.025	0	15.68	10.289	32.829	3.3916	2.255
AGAP7	0.75722	6.9501	6.5313	6.1906	0	1.5165	0.36741
AGAP8	2.0065	1.7637	10.011	8.9514	8.642	0.71545	11.402
AGAP9	0.2616	3.869	2.5371	6.1896	0	4.2935	2.0595
AGBL1	0.032418	0	0.14824	0.12859	0	0.015854	0
AGBL2	1.0633	2.4413	0.69618	4.0347	0	0	0.22485
AGBL3	0.11999	1.0437	0.6643	1.2917	0	0.54683	1.2965
AGBL4	0.12467	0	0.47607	0.016005	0	0	0
AGBL5	16.023	0.15375	8.5717	10.257	31.315	6.0327	41.269
AGER	2.2261	0	16.324	5.0475	2.191	6.4248	4.4936
AGFG1	1.8147	0.60625	7.1474	8.6327	0.68911	9.987	1.2946
AGFG2	2.4394	0	8.6789	15.831	0.57364	0.019145	12.024
AGGF1	36.154	13.231	22.353	23.233	11.77	15.826	20.884
AGK	14.032	5.5514	26.755	57.089	27.511	9.7448	83.275
AGL	10.609	4.7099	11.368	12.688	1.9365	5.6443	17.151
AGMAT	25.112	10.878	31.275	39.625	14.271	12.006	32.977
AGMO	4.8181	4.3713	3.0518	4.329	6.9398	1.3055	3.3223
AGO1	11.723	10.395	0.98932	9.7858	14.551	8.0376	3.7009
AGO2	0.13999	4.2137	17.486	16.853	12.062	10.824	5.4506
AGO3	17.432	50.551	21.133	31.308	2.5145	12.937	24.017
AGO4	1.3662	2.7538	2.4086	7.294	11.766	8.4573	29.511
AGPAT1	16.799	89.211	32.08	32.534	32.223	17.366	57.379
AGPAT2	9.3227	20.71	19.665	28.719	53.743	40.165	96.319
AGPAT3	4.4535	6.46	8.4032	4.4202	1.12	6.9645	2.9245
AGPAT4	0	3.9826	1.6656	0.97156	1.7373	3.103	27.419
AGPAT4-IT1	0	0	3.9288	1.2476	0	2.9373	22.6
AGPAT5	12.541	0.9125	4.4227	12.599	20.569	8.3372	0
AGPAT6	12.876	26.81	25.303	22.267	51.341	28.683	18.323
AGPAT9	0	0	2.6295	1.8312	6.3781	15.436	0
AGPHD1	0	13.635	1.9185	2.1557	10.975	0	0
AGPS	3.3043	3.6112	5.5099	9.9191	2.6654	5.4734	10.198
AGR2	0	0	0	0.027405	0	0	0
AGR3	0	0	0	0	0	0	0
AGRN	0.11048	2.9776	0.74129	2.3776	17.434	0.72245	1.1404
AGRP	0	0	0	1.0094	0	4.7533	0
AGSK1	0.29112	6.8424	0.038667	0.69339	0.72728	0.012073	3.949
AGT	0	0	0	0.35607	0	0.045609	0
AGTPBP1	3.4731	2.3538	16.402	21.142	10.851	17.473	46.756
AGTR1	0	0.24375	0	0.075	0	0	0
AGTR2	0	0	0	0.16171	0	0	0
AGTRAP	68.745	373.06	77.883	90.52	18.61	216.08	161.03
AGXT	0	0	0.11103	0.13029	0	0	0
AGXT2	0	0	0.1486	0.11049	0	0	0
AGXT2L1	0.10178	0	0	0	0	0.00561	0
AGXT2L2	67.351	14.794	67.826	78.82	45.831	25.08	39.744
AHCTF1	4.8139	19.55	3.5657	13.976	14.948	2.4191	9.5509
AHCTF1P1	0	0	0.16836	0.3534	0	0.065363	0
AHCY	51.384	111.59	17.073	43.157	58.017	41.991	83.425
AHCYL1	21.951	60.701	18.65	15.915	33.721	19.385	21.9
AHCYL2	0.44675	0.1375	3.4226	3.2519	3.5181	0.60511	2.1684
AHDC1	0.071771	2.2337	0.96	0.87043	4.9465	0.45792	0.51165
AHI1	8.5082	18.717	14.109	35.85	22.9	4.6442	11.21
AHNAK	54.93	199.3	172.53	125.25	89.703	60.149	245.97
AHNAK2	0.89802	15.506	0.12215	1.4717	3.0618	0.092314	0
AHR	5.2419	53.872	19.396	15.874	30.838	44.576	4.7704
AHRR	0.25596	10.875	2.2072	1.7205	0	0.20805	0.23549
AHSA1	88.741	60.668	131.82	139.48	21.306	74.382	74.674
AHSA2	21.416	25.305	19.89	12.346	19.245	4.3657	17.472
AHSG	0	0	0.19261	0.65076	0	0	0
AHSP	0	0	0	0	0	0	0
AICDA	29.487	0.47999	11.932	11.619	2.9864	4.7978	6.6419
AIDA	44.112	13.595	10.982	14.924	10.988	15.977	32.042
AIF1	12.922	0	11.367	26.933	0	1543	0
AIF1L	0	14.34	0.97331	2.6696	45.291	0.090855	0
AIFM1	48.576	48.922	43.485	37.993	20.856	26.674	16.931
AIFM2	4.9545	21.84	9.3606	15.751	3.14	1.3348	11.989
AIFM3	0	0	0.4639	0.059138	0	2.546	0
AIG1	10.478	20.716	3.8278	5.3936	18.956	29.966	35.497
AIM1	25.899	0.85373	41.847	25.209	2.4783	11.745	38.692
AIM1L	2.885	0	4.7604	1.4592	0	0	0
AIM2	145.71	0.43499	24.816	38.518	1.9501	34.905	0.1642
AIMP1	27.731	40.585	14.005	23.684	17.463	27.07	38.07
AIMP2	20.412	221.25	22.221	34.665	0	46.453	53.855
AIP	196.93	100.59	341.17	227.35	150.07	118.15	240.42
AIPL1	10.032	1.9025	9.6941	11.382	6.0182	3.8332	14.314
AIRE	1.4406	0	1.6013	1.0445	0	0.74755	0.51905
AIRN	0.21967	0	0.20564	0.95347	0	0.10817	0
AJAP1	0.054353	0	0.29054	0.18145	0	0.19352	0.077744
AJUBA	0.13419	0.1325	0.75306	1.411	1.5982	0.3556	1.4178
AK1	11.571	67.212	29.684	34.164	70.479	4.341	25.178
AK2	58.015	64.023	77.115	80.485	54.433	41.951	86.527
AK3	21.028	68.218	43.28	62.537	37.277	26.185	22.667
AK4	0.18839	7.3588	9.2843	6.0922	17.323	8.4466	5.3556
AK5	0.09677	6.0213	0.055588	0.089518	0	0	5.8436
AK7	1.043	0	1.0482	1.0125	4.8155	0	0
AK8	0	1.8	0.10025	0.12813	0	0	0
AKAP1	6.55	0	5.2571	8.3402	1.7709	2.4384	0.57745
AKAP10	29.75	9.6638	35.286	32.748	15.207	32.395	6.4193
AKAP11	10.083	4.22	10.548	16.721	5.802	5.9314	10.838
AKAP12	3.8972	40.008	0.222	0.66964	3.6617	1.5944	0.10581
AKAP13	61.03	38.61	92.095	89.904	95.481	42.099	173.17
AKAP14	0	0	0	0	0	0	0
AKAP17A	20.934	0	5.9818	10.575	21.403	4.0766	1.3319
AKAP2	87.826	9.2638	17.03	10.266	74.569	8.9268	21.002
AKAP3	0.044192	0	0	0.52568	11.693	2.1701	0
AKAP4	0	0	0	0.02256	0	0	0
AKAP5	8.2758	3.0101	13.426	40.518	11.221	4.269	21.072
AKAP6	0.66175	0.06875	0.002354	0.32737	0	0	0
AKAP7	0.16418	0	15.365	13.674	0	1.0114	8.6312
AKAP8	36.301	27.952	23.828	35.791	18.462	12.882	30.468
AKAP8L	2.7461	0	16.988	24.672	15	7.8879	9.4003
AKAP9	30.472	9.0999	32.176	31.648	29.787	25.346	32.325
AKD1	29.969	0.43125	10.18	11.587	4.2417	7.059	10.262
AKIP1	70.606	39.746	93.731	92.963	89.147	50.747	61.106
AKIRIN1	73.7	63.269	123.78	107.36	26.222	37.411	57.048
AKIRIN2	37.825	62.082	33.226	47.661	8.5699	55.172	25.764
AKNA	35.463	8.7778	77.72	77.285	3.7262	14.757	165.8
AKNAD1	0	0	0.014545	0.055749	0	0.25243	0
AKR1A1	99.349	144.23	85.779	78.567	29.236	225.52	104.86
AKR1B1	126.88	52.736	107.47	159.75	52.901	276.27	60.322
AKR1B10	4.1474	1.5237	7.1546	6.0659	5.2083	2.8817	7.0796
AKR1B15	0.73464	0	0.86069	0.52442	0	0.1539	0.45614
AKR1C1	0	41.747	0.19855	0.048056	2.17	0.089392	0
AKR1C2	0.12048	7.5741	0.73377	0.10186	0	0.043416	0
AKR1C3	0	150.54	9.6362	1.0437	199.52	0	207.81
AKR1C4	0	0	0.13012	0.046204	0	0	0.42002
AKR1C6P	0.2016	0	0.22666	0.22995	0	0.17719	0.14258
AKR1CL1	0	0	0.14097	0.31089	0	4.5702	0
AKR1D1	4.4713	3.0376	4.3332	5.192	1.7873	1.319	5.8937
AKR1E2	0	0	2.7213	0.36232	3.5564	0.68789	0
AKR7A2	73.55	170.49	15.496	50.585	32.753	27.685	96.041
AKR7A2P1	0	0	0	3.6537	1.5628	0.069266	0
AKR7A3	0	0	0	0.73315	0	0.12352	0
AKR7L	0.46144	0.0875	1.1627	1.6128	0	0.32244	0.50807
AKT1	15.95	21.578	21.041	23.569	13.991	11.257	14.352
AKT1S1	2.1241	2.6398	2.5879	1.4116	0	8.5402	0
AKT2	7.246	10.834	13.116	12.572	3.7991	4.9001	3.4217
AKT3	5.224	11.689	7.3848	13.368	6.6727	1.6356	36.05
AKTIP	20.703	24.301	90.469	46.384	44.977	5.9643	105.5
ALAD	10.199	22.342	35.183	19.924	26.603	38.69	0.13194
ALAS1	21.118	17.355	21.798	37.976	58.181	46.01	54.752
ALAS2	0	0	0.042847	0.12116	0	0.35268	0.48132
ALB	0	0	0	0.038414	0	0	0
ALCAM	37.533	0	12.173	10.811	0	53.248	0.85746
ALDH16A1	27.118	8.744	16.682	13.891	63.271	15.501	13.981
ALDH18A1	30.242	59.293	21.201	38.872	5.4438	6.1721	68.716
ALDH1A1	0	11.207	5.8579	1.2264	34.036	99.115	9.6141
ALDH1A2	0.075318	0	0.454	0.64403	15.516	2.3522	1.4549
ALDH1A3	0	115.77	0.025334	0.78859	6.7237	0.061708	0
ALDH1B1	12.461	57.129	10.375	12.897	29.205	9.3479	29.49
ALDH1L1	0	0	0.029393	0.10725	0	0	0
ALDH1L1-AS1	0	0	0	0.12076	0	0	0
ALDH1L1-AS2	0	0	0	0.22563	0	0	0
ALDH1L2	7.3008	21.805	2.6981	3.051	0.31728	0.74523	2.4052
ALDH2	15.047	234.61	0.37902	2.7551	98.426	268.05	0.63972
ALDH3A1	0	0	0	0.026866	0	0	0
ALDH3A2	19.629	32.292	27.073	40.042	19.815	28.384	65.811
ALDH3B1	2.7207	6.6366	5.6733	7.1735	3.1137	52.375	10.883
ALDH3B2	0	0	1.3742	0.11762	0	0.59682	0
ALDH4A1	5.6758	0	0.26012	1.7395	0	2.0548	0
ALDH5A1	17.421	3.5413	6.7838	12.641	2.4609	3.6573	25.995
ALDH6A1	8.8177	14.518	22.279	30.872	18.951	10.645	0
ALDH7A1	0.95301	36	1.0585	1.9129	1.5672	4.7925	0.49195
ALDH8A1	2.9839	0.33124	8.6866	3.9418	2.1482	1.224	3.7669
ALDH9A1	70.964	45.207	83.491	106.9	216.63	86.61	155.91
ALDOA	506.84	1353.4	1017.5	1109.4	766.07	1568.3	474.04
ALDOB	0	0	0	0.26258	0	0	0
ALDOC	30.513	9.1536	124.49	77.68	0	39.629	17.065
ALG1	13.111	48.336	35.836	39.439	23.596	13.23	83.133
ALG10	1.2638	0	2.8552	8.016	3.7373	3.847	0
ALG10B	6.255	1.9625	1.8363	7.9746	0.35818	2.302	3.054
ALG11	19.234	4.6137	31.876	28.51	14.743	12.577	0
ALG12	37.873	17.16	31.433	46.79	14.259	40.933	43.638
ALG13	22.404	42.861	24.379	30.295	32.876	19.406	16.366
ALG14	48.363	6.9974	7.9634	8.404	0	4.216	0
ALG1L	4.1986	0.99375	4.7124	3.5156	5.7462	2.8582	1.8371
ALG1L2	0.080318	0	1.3302	0.59448	1.2654	0.21683	1.7114
ALG1L9P	22.052	3.7749	8.336	10.618	12.309	9.3379	6.8891
ALG2	35.12	34.357	15.714	37.506	18.71	21.183	25.192
ALG3	45.488	134.6	36.703	65.341	44.618	35.278	72.624
ALG5	75.155	82.844	48.406	55.241	77.031	81.385	46.14
ALG6	12.503	4.3213	17.607	27.542	21.945	7.6443	4.8314
ALG8	7.7597	22.877	40.961	53.676	50.452	24.222	26.354
ALG9	23.296	7.8639	12.006	8.0489	0.82366	8.1482	3.4133
ALK	2.3952	0	0.071394	0.089274	1.8955	0.017561	0
ALKBH1	27.038	33.403	10.699	12.866	4.7773	7.2541	0
ALKBH2	23.923	0	25.669	9.4272	18.298	3.017	0
ALKBH3	16.656	51.381	18.903	42.75	3.3608	33.097	61.039
ALKBH4	31.339	20.225	15.441	18.543	8.5366	5.8331	72.627
ALKBH5	49.798	25.034	44.681	44.839	54.693	15.497	35.622
ALKBH6	35.522	24.819	43.152	49.202	36.962	12.882	80.549
ALKBH7	38.089	29.362	76.453	41.693	66.344	58.801	42.261
ALKBH8	0.61097	0	13.267	6.5526	17.339	2.8684	25.07
ALLC	0	0	0	0.012185	0	0	0
ALMS1	1.5554	1.4075	5.82	5.056	0.47092	0.29134	1.6945
ALMS1P	0	0	2.2462	0.22271	0	0.82592	0
ALOX12	2.9192	0	1.6099	0.96842	0	0.25878	1.2639
ALOX12B	0.059673	0	0.10709	0.12731	0	0	0
ALOX12P2	0.38272	0	4.4722	2.3353	0	0.17037	3.8816
ALOX15	10.722	0.14	0.82491	0.73618	0	0.28768	1.7319
ALOX15B	0	3.5874	0.029637	0.42739	0	6.8575	0
ALOX15P1	0.22064	0	0	0.084372	0	0	0
ALOX5	363.33	0.115	1.8671	0.057466	0	234.25	0
ALOX5AP	336.87	0	331.72	424.13	0	346.36	493.7
ALOXE3	0	0	0	0.018055	0	0	0
ALPI	0	0	0	0	0	0	0
ALPK1	26.021	5.0111	6.8766	6.1896	6.9319	11.916	5.7656
ALPK2	4.7709	2.92	0.25916	0.4131	0	2.3327	0
ALPK3	0	0	1.6176	0.32272	6.4017	0.40489	0
ALPL	3.145	192.89	0.43739	0.0059903	235.27	0	0
ALPP	0.74481	0	0.50909	0.783	0	0.19256	0.36872
ALPPL2	0	0	0	0	0	0	0
ALS2	6.8367	0.038749	8.0832	10.371	9.3218	4.4694	14.785
ALS2CL	0.65917	1.4025	6.3528	1.7284	29.71	11.839	1.5616
ALS2CR11	0	0	0	1.4558	0	0.33171	0
ALS2CR12	0	0	2.8856	1.6044	0	0.15122	0.78873
ALS2CR8	21.593	5.4238	11.367	11.838	0.16545	2.9697	4.5026
ALX1	0	0	1.5448	1.6549	0	1.5727	0
ALX3	5.4527	0.21875	0.7186	1.1011	0	0.49171	7.4268
ALX4	0	0	0.34315	1.3512	0	0	0
ALYREF	0.034836	0	2.6194	1.8868	0	3.9976	2.3204
AMACR	15.987	18.758	5.6498	6.4871	12.858	1.8732	36.332
AMBN	0	0	0	0	0	0	0
AMBP	0	0	0.099334	0.1972	0	0.10085	0
AMBRA1	15.713	6.9672	16.062	20.257	27.021	5.7128	34.112
AMD1	56.51	20.664	55.433	71.837	192.1	61.943	107.9
AMDHD1	4.4643	0	0.3189	5.6197	0	1.1405	0
AMDHD2	7.3254	21.258	27.004	27.602	36.744	44.26	15.389
AMELX	0	0	0	0.0044541	0	0	0
AMELY	0	0	0	0	0	0	0
AMER1	0.086125	0.0325	0.68319	2.6121	3.3346	0.38134	0.0083872
AMER2	0	0	0.01897	0.12178	0	0	0
AMER3	0.9035	0.081249	1.1913	1.8998	0.66273	0.53475	1.0084
AMFR	41.162	2.5925	11.263	10.149	26.604	14.538	14.869
AMH	0	0	0	0.0043314	1.5345	0	0
AMHR2	0	0	0	0.0069496	0	0	0
AMICA1	0.40141	0	68.829	238	0	202.4	5.4674
AMIGO1	0	4.4136	1.5727	0.95178	0	0	0.46133
AMIGO2	4.4455	10.811	11.193	46.639	0	0.18842	0
AMIGO3	3.2242	0	7.5442	3.4951	0	3.1508	30.53
AMMECR1	24.141	0.98124	8.777	11.868	0	2.7927	0
AMMECR1L	17.422	15.399	7.679	7.2177	4.2628	3.0103	1.1358
AMN	0.80467	0	0	0.59455	0	0	0
AMN1	57.69	5.8176	12.097	11.592	26.019	2.7029	32.874
AMOT	0.068706	3.4636	0.4475	0.22171	1.0999	0.18598	10.175
AMOTL1	0.18482	21.323	0.068425	0.4084	24.381	0.77364	0
AMOTL2	0.23385	85.174	1.6857	0.51517	46.992	0.055728	0
AMPD1	3.9917	0	0.018674	0.11566	0	0	0
AMPD2	32.027	56.628	34.994	25.884	70.134	68.919	46.986
AMPD3	30.398	0	11.777	7.5733	0	15.598	0
AMPH	0	2.6849	0.054121	0.47745	0	0	6.381
AMT	19.092	0	16.673	12.092	2.1046	1.7897	25.327
AMTN	0	0	0	0	0	0	0
AMY1A	0	0	6.0606e-05	0.099842	0	0.00024389	0
AMY1B	0	0	0.072364	0.31855	0	1.5097	0
AMY1C	0	0	0.11927	0	0	0.2479	0
AMY2A	0.072577	0	0	0.33613	0	0	0
AMY2B	11.949	3.6012	7.1454	9.1355	1.4128	3.2258	11.718
AMZ1	3.04	0.061249	1.6949	1.4321	0.25546	0.39511	0.20517
AMZ2	127.4	81.653	68.682	111.46	9.3962	45.088	2.5621
AMZ2P1	12.598	5.1436	5.0383	8.7181	5.8408	16.117	1.3036
ANAPC1	6.6972	11.814	5.3595	14.075	1.851	1.6685	10.051
ANAPC10	9.0968	3.7663	11.643	23.906	15.511	7.0289	11.401
ANAPC11	188.51	169.14	75.833	101.84	192.27	199.82	97.111
ANAPC13	59.977	80.924	63.757	69.076	57.216	100.65	4.8245
ANAPC15	33.678	24.73	52.565	43.213	18.983	59.038	80.224
ANAPC16	112.82	30.005	152.1	130.67	59.02	47.402	133.1
ANAPC1P1	3.2995	2.5976	1.4113	21.236	0.65819	0.02378	0.55906
ANAPC2	3.0969	8.3723	3.0767	7.0662	1.0427	4.5961	2.0207
ANAPC4	26.096	5.5599	15.075	37.034	18.56	11.264	15.854
ANAPC5	135.34	81.103	147.81	137.91	111.09	75.6	109.49
ANAPC7	55.352	18.782	55.692	55.542	41.195	14.098	88.077
ANG	29.724	32.042	2.7837	0.23163	0	11.923	0
ANGEL1	8.0971	2.1439	17.996	12.288	84.794	15.752	38.821
ANGEL2	12.035	16.753	15.606	18.863	12.552	5.7905	29.963
ANGPT1	0	1.1975	0	0.992	0	0	0
ANGPT2	5.3412	5.3962	7.5602	9.3835	8.4492	5.0259	11.416
ANGPT4	0	0	0.118	0.044733	0	0	0
ANGPTL1	16.41	7.3412	0	0.10877	0	0.035975	0
ANGPTL2	0	135.3	0.5578	0.60657	5.6491	0.64036	0
ANGPTL3	0	0	0	0.020829	0	0	0
ANGPTL4	0	12.816	3.5738	0.53286	1.3027	59.932	0
ANGPTL5	0	1.3513	0.11091	0.050086	0	0	0
ANGPTL6	7.6094	0	3.2364	0.13583	3.4165	0.20609	0.33935
ANGPTL7	0	0	3.7799	0.90644	0	0.84095	0
ANHX	0	0	0.5138	0.40612	0	0	0
ANK1	10.365	4.8913	6.1725	3.0882	0	0.0035367	0
ANK2	2.0246	36.106	0.16976	1.2098	0	0.34098	0
ANK3	4.3559	0	18.614	5.7975	0	0.83484	1.3023
ANKAR	2.4689	2.4873	1.6396	2.3124	0.6773	1.6118	0.25871
ANKDD1A	1.8551	0.088748	6.1946	7.3064	15.53	3.7019	8.6054
ANKDD1B	0	0	0.21824	0.15296	0	0	0
ANKEF1	0.22644	0	5.0128	1.5126	9.6522	1.1167	0.32517
ANKFN1	0	3.861	0.036849	0.13478	0	0	0
ANKFY1	7.5358	17.033	10.544	16.032	5.301	7.1854	33.431
ANKH	12.291	7.5689	17.954	9.6382	6.5763	4.2435	18.483
ANKHD1	44.984	19.804	76.097	75.535	23.998	25.812	59.1
ANKHD1-EIF4EBP3	0.23612	10.984	1.0614	6.1996	0	3.9556	8.3899
ANKIB1	23.806	34.135	17.214	18.506	8.2273	1.119	33.848
ANKK1	0.037255	0	7.8778	2.0475	0	0.19256	0.3697
ANKLE1	11.487	1.345	15.982	17.541	4.3136	8.9092	15.149
ANKLE2	12.492	1.3412	7.6035	13.39	3.5091	1.5842	12.21
ANKMY1	18.364	9.1264	12.515	23.18	23.476	2.8885	3.7884
ANKMY2	28.681	21.364	14.606	19.011	0	5.0148	28.77
ANKRA2	60.693	3.1074	38.968	38.739	21.745	18.59	4.9889
ANKRD1	0.47128	0	0.19363	0.25066	0	0.3517	0
ANKRD10	155.02	122.54	128.58	195.36	225.84	78.256	297.42
ANKRD11	26.32	10.94	20.08	18.16	19.856	9.0621	17.784
ANKRD12	51.309	6.4986	56.747	58.471	14.495	18.453	34.979
ANKRD13A	40.184	15.856	21.076	12.099	4.6337	9.973	2.1803
ANKRD13B	0	21.859	0.039636	0.24996	3.1872	0.095366	0
ANKRD13C	13.338	13.603	23.808	21.272	20.486	5.4787	42.803
ANKRD13D	9.6658	19.984	14.9	26.719	0.87818	12.542	32.876
ANKRD16	17.056	4.9076	12.233	13.801	6.5719	7.5178	13.227
ANKRD17	15.179	3.6213	22.32	18.847	21.765	5.9074	17.603
ANKRD18A	0.30046	0	2.8675	1.9206	0	0.01439	0.046454
ANKRD18B	0.18402	0	0.23225	0.75331	0	0.045243	1.0207
ANKRD18DP	3.8759	0	0.050425	0.21788	0	0	0
ANKRD19P	0.4511	5.9051	2.813	4.3136	6.3311	7.1165	2.4767
ANKRD2	0	0	0	0.0062904	0	0	0
ANKRD20A1	0.23708	0	1.2496	0.72546	0	0.039999	3.1321
ANKRD20A11P	0	0.75125	1.3526	1.7624	0	0.0039024	10.487
ANKRD20A12P	6.1097	0	3.1775	6.2568	18.419	0.62572	3.1566
ANKRD20A19P	1.468	0.2575	1.7662	1.3934	1.7245	0.65743	2.1668
ANKRD20A2	0.65849	0	0.32661	1.5848	0	0.079999	10.161
ANKRD20A3	0.37013	1.33	1.0911	1.1747	0	0.4222	0.87904
ANKRD20A4	0.95587	0	1.2234	4.3895	0.96271	0.70428	0
ANKRD20A5P	0.57142	0	0.78351	3.9765	1.3882	0.11756	3.3818
ANKRD20A8P	0.13193	0	0.24989	1.4468	0	0.069267	2.2343
ANKRD20A9P	18.372	7.8801	24.541	27.233	14.451	8.6672	20.063
ANKRD22	0.22354	0	1.313	0.3286	0.054545	38.536	0.15323
ANKRD23	10.378	0	7.3083	5.5167	0.39364	0.090121	8.3119
ANKRD24	0	0	0	0.15228	0.90636	0	0
ANKRD26	15.392	8.7322	5.3617	4.7148	3.5673	5.6024	0.22033
ANKRD26P1	0	0.59127	0.45933	0.028004	0	0	0
ANKRD26P3	0	0	0.027394	0.098595	0	0.23621	0
ANKRD27	10.251	5.2598	26.553	26.151	28.426	15.706	26.436
ANKRD28	4.5833	4.0337	8.4842	5.1421	23.979	3.4676	10.734
ANKRD29	0	0.49749	0	0.079808	21.79	4.3855	0
ANKRD30A	0	0	0.0058787	0.05639	0	0	0
ANKRD30B	0	0	2.8997	0.52026	0	1.2383	0
ANKRD30BL	5.5747	1.4213	6.266	11.472	1.6827	1.3683	2.9398
ANKRD30BP2	6.6942	0.59249	4.8357	6.7956	2.4982	2.2635	3.4781
ANKRD30BP3	0	0	0	0.20127	0	0	0
ANKRD31	0	0.044999	0.86514	0.27377	0	0	0
ANKRD32	8.9151	2.39	23.629	33.262	10.411	1.2527	12.082
ANKRD33	0	0	0	0.16542	0	0.51961	0
ANKRD33B	3.1571	0.2175	0.20491	0.85684	0.045454	0.026708	5.9067
ANKRD34A	1.4892	2.2099	0.60266	2.3062	0	0.0030489	21.608
ANKRD34B	0	0	0.022485	0	0	1.1607	0
ANKRD34C	0	0	0.021334	0.090397	0	0.0057316	0
ANKRD35	0	3.6962	1.6759	6.4675	0	0	0.1342
ANKRD36	69.554	42.673	127.7	107.66	30.709	7.5375	83.155
ANKRD36B	44.249	12.364	88.297	72.466	44.576	6.7668	70.083
ANKRD36BP1	94.024	39.014	125.92	97.751	89.259	49.996	168.42
ANKRD36BP2	31.817	0.1975	2.4405	2.6074	0	0.37487	2.7482
ANKRD37	11.81	3.4113	33.458	16.965	54.601	24.542	3.8998
ANKRD39	42.85	14.265	115.72	56.527	49.124	32.2	101.28
ANKRD40	14.478	2.105	13.154	21.896	23.226	15.284	50.572
ANKRD42	0.071613	0.7275	8.675	4.7082	9.6463	8.629	0.9781
ANKRD44	225.53	19.857	214.93	237.56	0	81.065	293.59
ANKRD45	4.8822	1.1475	5.3755	5.1464	4.8546	2.2598	4.411
ANKRD46	22.307	0	6.1364	10.961	5.9119	2.2504	0.046775
ANKRD49	25.793	24.483	39.07	36.062	21.668	12.929	40.027
ANKRD50	1.1341	6.9175	0.75164	3.2063	19.76	1.8318	0
ANKRD52	13.114	8.3302	6.4417	16.018	10.685	6.0078	20.28
ANKRD53	0	0	2.6817	0.050253	1.5546	0	0
ANKRD54	46.968	0.72251	12.148	24.69	21.952	5.7081	7.1997
ANKRD55	0	0	4.1724	0.3086	0	0	0
ANKRD6	8.8205	2.2838	0.82684	0.69759	0	0.50561	0
ANKRD61	0	0	0	1.0243	0	0	0
ANKRD62P1-PARP4P3	0.21177	0	0.29976	0.60339	0	0.50805	0.5042
ANKRD63	0	0	0	0.029545	0	0	0
ANKRD65	8.4791	12.766	4.0997	4.7212	0.13909	4.6441	5.1478
ANKRD66	0	0	0	0.14372	0	0	0
ANKRD7	0	0	0	1.8997	0	0	0
ANKRD9	0	0	0	1.3762	0	6.7128	0
ANKS1A	0.77187	4.2886	3.1132	3.1769	6.1238	3.8742	22.428
ANKS1B	0.5774	0	1.8918	9.1198	0	0.31254	0
ANKS3	7.0921	1.2012	2.335	15.932	24.511	12.771	5.2909
ANKS4B	11.741	3.7825	15.661	13.328	13.749	6.826	13.297
ANKS6	2.6088	1.21	0.53872	0.83498	0	1.0863	0
ANKUB1	0	0	0.26922	0.09586	0	0	0
ANKZF1	59.607	60.936	69.685	91.13	91.577	16.693	83.907
ANLN	3.728	4.4975	1.9645	1.8125	0	2.0364	0
ANO1	0	12.442	0	0.10905	1.3582	0	0
ANO10	4.6371	19.314	9.3838	7.019	8.0618	9.976	5.2776
ANO2	0.13757	0	0.023819	0.22198	26.314	0.011707	0
ANO3	0	0	0	0.39333	0	0	0
ANO4	0	0	0.026364	0.037221	0	0	0
ANO5	0.10822	0	0.060243	0.17536	0	2.8912	0.97323
ANO6	4.946	22.385	16.476	8.2183	32.207	19.072	21.265
ANO7	0.054351	5.8101	0.5875	0.099663	0	0.10866	0.11452
ANO8	0	0	0.19662	0.16228	0.4791	0.050368	0
ANO9	5.7601	0	44.299	42.153	73.382	0	0.33999
ANP32A	24.689	9.9101	20.889	16.025	6.0319	16.967	33.831
ANP32A-IT1	12.511	4.145	15.408	17.028	2.9864	6.6383	11.561
ANP32AP1	0	0	0	0.12641	0	0.081095	0
ANP32B	164.49	112.38	198.91	151.17	89.701	90.923	61.893
ANP32C	0	0	0.08776	0.024068	0	0	0
ANP32D	0	0	0	0.16154	0	0	0
ANP32E	154.35	80.792	106.16	142.05	14.343	48.463	101.41
ANPEP	0	88.827	2.2527	0.88002	15.985	90.732	0
ANTXR1	0.64255	152.65	0.19419	0.57002	0	1.2073	0.47874
ANTXR2	25.146	16.317	49.432	7.0774	37.632	17.45	6.7198
ANXA1	0.76156	739.07	653.84	285.89	790.39	671.12	536.09
ANXA10	0	0	0	0.18109	0	0	0.16097
ANXA11	102.23	101.17	136.53	109.14	90.858	74.016	148.51
ANXA13	0	0	0.18406	0.022627	0	0	0
ANXA2	222.86	3154.9	393.82	374.19	2274.7	1193.5	508.11
ANXA2P1	0	0	0.17267	0.27531	1.8018	0.26695	2.1794
ANXA2P2	2.4381	1.39	2.8193	2.1417	2.3146	2.4625	31.996
ANXA2P3	0.094511	1.3163	0.18751	0.34288	0.91275	0.42513	0.059357
ANXA2R	38.543	0	48.246	48.082	20.821	6.1001	76.063
ANXA3	0	0	0.0079302	0.3764	0	0.73535	0
ANXA4	11.044	120.04	17.76	28.44	70.761	64.075	63.864
ANXA5	172.91	858.07	281.21	472.23	567.97	742.63	78.65
ANXA6	276.55	212.1	327.16	304.67	70.509	52.324	338.16
ANXA7	172.69	120.25	239.54	173.75	193.18	130.86	99.594
ANXA8	0	0	0.12521	0.3559	0	0	0
ANXA8L1	0	0	0	0.0048595	0	0	0
ANXA8L2	0	0	0	0.0014505	0	0	0
ANXA9	0	0	0.14521	3.551	0	0	0
AOAH	0.0079028	0	32.64	158.16	0.79819	221.47	444.1
AOAH-IT1	0	0	0	2.1538	0	0.94034	0
AOC2	0	0	0.033454	0.22893	0	0	0.074839
AOC3	1.1496	0	0.37492	0.049316	85.432	0.26232	0
AOC4	9.357	0.33501	2.1077	1.5779	53.33	0.77974	1.0788
AOX1	0	62.483	0.080122	0.024078	0	0.002439	0
AOX2P	0.029031	0	0.61182	0.21838	0	0.23963	0.44743
AP1AR	17.1	0.4	26.809	33.537	19.624	2.4284	3.3233
AP1B1	77.458	15.386	20.14	37.12	52.289	118.71	12.519
AP1B1P1	0	0	0	0.40737	0	0	0
AP1G1	34.359	17.332	17.219	29.914	8.4083	15.05	32.288
AP1G2	144.4	28.45	87.093	125.14	59.029	22.371	148.43
AP1M1	109.66	90.787	93.041	108.45	45.581	56.091	163.94
AP1M2	0	0	0.019675	0.14097	0	0	0
AP1S1	10.429	16.5	6.3289	11.865	21.42	11.465	14.31
AP1S2	74.819	38.829	86.82	46.878	60.679	253.44	40.915
AP1S3	47.538	9.8163	40.482	50.148	19.756	19.591	28.972
AP2A1	5.1935	58.4	15.175	8.3519	26.574	11.117	25.878
AP2A2	0.19369	13.278	3.1879	5.5768	24.91	13.099	0.58132
AP2B1	77.368	41.183	51.395	91.047	92.099	16.099	43.725
AP2M1	90.582	476.62	162.01	208.06	204.53	174.49	197.53
AP2S1	73.051	187.88	88.71	94.129	99.273	272.62	156.5
AP3B1	41.511	11.504	58.023	53.368	47.026	34.737	53.554
AP3B2	0	0	0	0	0	0	0
AP3D1	24.487	32.844	20.223	21.413	2.1318	18.734	13.401
AP3M1	26.21	26.862	40.009	56.009	26.506	21.297	23.512
AP3M2	0.9714	0	18.647	20.729	7.7307	1.8975	21.113
AP3S1	78.997	113.2	80.026	126.1	54.81	80.81	103.96
AP3S2	11.371	21.328	23.651	18.741	0.92182	9.3702	4.102
AP4B1	39.69	47.447	26.185	53.455	30.814	26.35	93.382
AP4B1-AS1	22.71	9.4736	15.994	28.928	9.3785	6.4583	13.481
AP4E1	8.016	2.0562	11.29	9.7417	4.5655	2.7557	13.031
AP4M1	3.125	7.7223	0.057758	5.2452	13.099	8.6538	5.9108
AP4S1	26.86	12.227	45.742	43.462	23.161	16.008	29.887
AP5B1	8.4004	0.68375	5.9183	17.32	3.82	7.9107	21.875
AP5M1	42.73	12.065	30.772	44.389	11.932	10.039	13.577
AP5S1	25.62	25.742	15.128	17.994	0.0018182	15.096	4.1075
AP5Z1	12.948	30.849	29.466	34.322	29.324	16.997	11.917
APAF1	11.63	5.4775	14.187	23.613	25.096	14.423	20.289
APBA1	0.10096	0	0.43901	0.96382	12.561	2.751	0
APBA2	0.065803	3.6825	22.851	8.9347	0	0	35.866
APBA3	20.653	10.484	49.462	43.816	45.964	2.6194	68.806
APBB1	25.222	33.139	62.774	62.785	17.158	11.356	5.7359
APBB1IP	80.004	0	84.314	74.892	0	56.911	79.783
APBB2	1.3762	9.4675	1.9143	1.5255	18.572	0.91704	1.2523
APBB3	3.7893	0	11.834	15.099	21.443	51.368	1.1788
APC	10.397	0.46251	8.7957	9.1256	10.63	8.14	18.12
APC2	0	0.01875	0.071818	0.10826	0	0.079024	0.044841
APCDD1	0	64.53	0.025212	0.035574	10.891	0.45939	0
APCDD1L	0	0	0	1.4834	0	0	0
APCDD1L-AS1	0	10.15	0	0.26495	0	0.2161	0
APCS	0	0	0	0.083245	0	0	0
APEH	35.5	39.06	63.171	84.595	62.245	38.031	26.236
APEX1	184.69	107.25	117.46	121.52	153.49	101.98	24.032
APEX2	23.666	31.176	18.904	28.198	20.229	26.636	53.563
APH1A	71.446	69.485	74.317	37.59	95.434	111.07	107.39
APH1B	40.229	2.8575	10.61	5.2314	0	18.322	0.16549
API5	61.231	19.071	61.604	95.999	4.9209	39.931	25.034
APIP	18.031	7.8213	44.043	31.408	18.086	37.389	21.134
APITD1	2.9981	8.1888	1.5349	5.8675	20.914	3.4331	9.21
APITD1-CORT	0.13725	3.7113	0	0.60413	4.3202	0	0
APLF	4.5057	0	1.6307	1.0672	2.201	0.15439	0.050323
APLN	0	0	0	0	0	0	0
APLNR	0	0	0.086428	0.074073	850.39	0.46035	9.6762
APLP1	0	0	0	0.98732	0	0.88498	0
APLP2	50.543	77.267	34.56	52.527	246.39	349.02	60.657
APMAP	56.384	73.695	125.01	248.24	148.91	184.31	588.18
APOA1	0	0	4.2863	1.7479	0	0	0
APOA1BP	63.234	158.81	59.101	55.904	51.99	80.829	44.076
APOA2	0	0	0	0	0	0.042072	0
APOA4	0	0	0	0.011882	0	0	0
APOA5	0	0	0	0.38756	0	0	0
APOB	0.11822	0	0.037394	0.015506	0	0	0
APOBEC1	0	0	0	0	0	0	0
APOBEC2	3.2685	0	7.6632	2.2135	0	0.96246	7.4895
APOBEC3A	14.459	1.5662	22.254	27.769	3.6983	509.68	15.198
APOBEC3A_B	0	0	0.37079	0.48347	0	239.34	0
APOBEC3B	4.3429	0	0.31958	4.5599	0	25.85	0.37936
APOBEC3C	290.17	132.24	354.89	561.31	1.7464	86.646	552.13
APOBEC3D	57.452	6.8326	72.319	85.164	20.781	10.491	81.809
APOBEC3F	43.219	7.6414	43.912	61.203	6.9628	15.858	73.62
APOBEC3G	93.317	0.92125	197.53	482.82	42.525	51.678	706.02
APOBEC3H	0.07161	0	40.907	40.952	0	2.2753	83.985
APOBEC4	0	0	0.76941	0.072807	0	0	0
APOBR	0.56223	0	1.9274	2.004	0.48182	3.3445	37.279
APOC1	0	2.2875	6.4322	6.4681	0	1433.7	0.24098
APOC1P1	12.794	0.36375	12.501	10.784	5.0837	13.494	18.375
APOC2	0	0	0.05594	1.4461	0	244.96	1.3249
APOC3	0	0	0	0.13546	0	0	0
APOC4	0.11064	0	2.1967	2.2363	0.25364	1.2559	5.1673
APOC4-APOC2	0	0	0	0.0024401	0	0.5729	4.671
APOD	36.128	702.28	38.992	12.231	0.41727	75.677	94.72
APOE	19.407	0	38.767	32.732	0.19818	1320.5	0
APOF	3.2334	0.24999	3.2963	2.5528	3.7927	0.84035	3.0811
APOH	0	0	0	0.082203	0	0	0
APOL1	38.379	185.39	46.476	51.245	139.84	46.814	64.98
APOL2	50.506	89.147	88.506	84.869	47.823	83.567	170.26
APOL3	80.856	19.2	75.351	83.671	137.9	65.115	60.57
APOL4	17.341	53.134	18.174	22.689	104.56	28.206	14.582
APOL5	0	0	0.38041	1.4248	0	0	0
APOL6	14.447	18.406	52.624	45.15	5.0383	27.538	56.798
APOLD1	3.1778	0.11375	6.3242	4.9246	32.73	1.6237	3.0998
APOM	6.9495	6.2611	1.3739	1.7201	0	5.0257	0
APOO	25.984	16.631	24.963	11.986	32.061	7.3505	7.5397
APOOL	9.9193	7.3212	9.8833	15.959	10.659	9.8163	14.688
APOPT1	31.552	61.11	23.366	36.955	48.492	39.844	51.354
APP	15.561	234.58	23.564	2.2169	678.85	48.883	0.19936
APPBP2	13.367	2.5425	18.992	17.298	7.9225	5.9238	9.8319
APPL1	34.816	20.632	14.257	12.539	7.543	21.471	28.62
APPL2	2.2815	47.465	6.0705	10.394	33.009	20.152	12.931
APRT	382.07	470.15	370.16	289.06	245.47	249.18	458.67
APTX	2.3571	12.676	19.469	21.816	78.921	23.625	39.134
AQP1	0	73.037	2.7337	0.1384	2180.1	0	0
AQP10	0	0	0	0.04328	0	0.36255	0
AQP11	0.1921	2.8026	2.4589	4.2404	0	1.9196	0
AQP12A	0	0	0	0.15022	0	0.38463	0
AQP12B	0	0	0	0.081962	0	0	0
AQP2	0	0	1.1776	0.13582	0	0	0
AQP3	37.822	28.828	221.97	28.25	0	0.037318	31.711
AQP4	0	0	0.26157	0.64452	0	0	0
AQP4-AS1	4.8078	0.23	7.2339	7.3432	2.6055	1.6338	8.4498
AQP5	0	0	0	0.014789	0	0	0
AQP6	11.766	4.1152	12.987	19.468	6.0194	3.9014	8.6319
AQP7	0.17805	0	0.073033	0.135	3.5526	0	0
AQP7P1	5.015	0	0.78455	1.1747	0.66273	0.3918	0
AQP7P3	14.299	0	3.2336	0.74198	0	1.2855	0
AQP8	0	0	0	0.11186	0	0.96166	0
AQP9	0	0	0.28497	0.27178	0	97.683	0.075163
AQPEP	0.22805	5.9511	0	0.0066563	0	0.007561	0
AQR	16.341	11.472	18.697	29.575	9.6264	11.256	40.179
AR	0	4.2024	0	0.86084	0	0	0
ARAF	46.976	15.084	53.854	51.261	72.996	38.211	56.336
ARAP1	21.143	81.753	33.422	32.838	26.929	83.247	40.895
ARAP2	6.4988	0	34.874	60.422	0.88636	8.4546	64.911
ARAP3	0.018709	0	0.57097	0.27366	9.8562	0.46462	0.065164
ARC	0	0	0	0.090206	0	0.12804	0
ARCN1	83.734	102.99	74.016	85.359	74.741	30.765	71.225
AREG	25.455	0	44.064	30.214	0	321.54	288.78
ARF1	405.58	845.14	421.3	529.27	800.82	443.24	927.45
ARF3	14.959	14.199	32.769	17.714	20.177	29.803	25.721
ARF4	88.453	340.23	100.13	120.44	159.44	155.86	52.439
ARF5	115.01	236.39	189.85	174.78	381.25	139.18	322.78
ARF6	79.025	7.1825	88.492	151.13	16.479	38.399	133.59
ARFGAP1	27.369	32.219	39.681	34.629	61.279	13.182	50.725
ARFGAP2	47.278	92.044	64.358	62.943	63.932	43.302	133.56
ARFGAP3	25.544	62.314	38.051	61.88	90.722	47.375	65.254
ARFGEF1	4.3625	10.883	10.11	18.593	3.5164	6.0982	12.677
ARFGEF2	2.8052	1.7362	6.0402	8.141	1.8663	5.1142	10.377
ARFIP1	38.529	16.921	39.805	38.159	27.751	19.074	54.036
ARFIP2	22.073	41.469	26.564	23.662	29.15	18.506	6.4382
ARFRP1	39.725	30.46	38.527	63.077	80.611	27.187	43.435
ARG1	1.8072	0	1.1551	0.3183	0	0.051462	0
ARG2	0.67655	0.43625	13.958	11.33	5.7947	9.3841	0.56549
ARGFX	23.169	6.5525	29.793	28.017	15.811	12.127	21.285
ARGFXP2	0.62933	0	2.7736	1.5705	0	0.45169	7.9112
ARGLU1	261.54	115.94	231.22	273.09	261.49	71.281	259.36
ARHGAP1	56.233	134.23	67.153	60.996	35.343	54.694	56.271
ARHGAP10	5.1424	9.81	1.9171	5.4289	0.65819	6.6401	0
ARHGAP11A	6.246	13.051	12.065	12.235	1.4437	7.8123	8.6994
ARHGAP11B	3.1441	29.447	13.353	18.265	0	3.0718	0
ARHGAP12	15.698	38.753	14.884	11.166	10.936	7.4503	9.5684
ARHGAP15	460.76	0	312.26	263.27	0	56.696	227.77
ARHGAP17	135.66	37.297	32.865	13.064	23.035	32.369	43.105
ARHGAP18	16.103	2.6476	24.917	31.922	11.781	96.516	30.009
ARHGAP19	4.7837	0	4.804	8.5478	3.8382	3.6214	0.020645
ARHGAP19-SLIT1	11.257	0	17.279	9.4281	7.4336	2.2748	8.0227
ARHGAP20	0.36532	1.8225	1.4053	0.31527	2.0165	0.6206	0
ARHGAP21	2.5204	8.6074	1.6334	1.8924	2.1563	4.4534	9.4748
ARHGAP22	0	0	0.19018	1.6027	1.3027	17.982	0.40001
ARHGAP23	0.026612	14.203	0.6174	0.22292	7.7865	0	0.12033
ARHGAP24	72.57	5.0585	0.35	0.2006	20.032	9.9643	1.5878
ARHGAP25	228.89	0	122.9	150.71	1.2882	56.586	217.49
ARHGAP26	4.6415	10.661	7.5873	11.976	12.216	9.2759	20.642
ARHGAP26-AS1	0	0	0.26431	0.11712	0	0.14548	0
ARHGAP27	55.52	0	41.012	55.599	15.731	48.704	55.644
ARHGAP28	0	13.77	0.014727	0.23185	3.8527	0	0
ARHGAP29	0	3.7951	0.59576	0.045183	27.452	0.24305	0
ARHGAP30	90.167	5.7401	144.11	170.72	0	82.783	251.18
ARHGAP31	1.8834	13.137	6.0937	5.228	50.982	19.716	0.24065
ARHGAP32	2.2059	0	0	0.079077	0	0.14707	0.65552
ARHGAP33	1.6086	21.469	4.3415	6.6958	0.055454	0.44695	0.75806
ARHGAP35	4.3283	1.765	8.0375	10.392	5.7146	3.5971	1.7439
ARHGAP36	0	0	0.082724	0.13051	0	0	0
ARHGAP39	0.57064	0	0.022425	0.16389	0	0	0
ARHGAP4	51.217	0	119.18	134.98	14.604	82.97	97.498
ARHGAP40	0	0	0.093273	0.007321	0	0	0
ARHGAP42	0.80918	6.0477	0.96099	1.605	2.2919	0.10049	10.242
ARHGAP44	2.0999	0	0.013576	0.26747	0	0.29732	0
ARHGAP5	16.058	16.945	9.0977	4.3482	8.3502	5.5862	1.9536
ARHGAP5-AS1	0	0	0.045091	1.827	0	0	0
ARHGAP6	0	0	0	0.0045013	18.589	0.6423	0.58228
ARHGAP8	0.40095	0	0.46304	1.9438	1.8901	1.4073	2.383
ARHGAP9	135.36	0	190.71	247.41	1.8064	66.212	571.14
ARHGDIA	38.495	62.723	46.139	30.483	81.106	50.893	58.321
ARHGDIB	1673	95.838	2188.3	1578.7	302.85	1174.5	2215.2
ARHGDIG	0	0	0	0	0	0	0
ARHGEF1	114.91	0.23625	196.56	212.94	93.009	35.409	252.74
ARHGEF10	1.3453	6.0864	0.047516	0.62365	30.537	1.336	1.0955
ARHGEF10L	0.15048	13.736	0.051879	0.19336	0	34.26	0.16484
ARHGEF11	0	1.8012	0.91309	0.35354	8.2366	4.1439	0
ARHGEF12	2.3432	2.135	1.9858	2.0735	19.571	1.2844	2.2345
ARHGEF15	0.068708	0	0	0.26975	67.45	0	0.2242
ARHGEF16	0	0	0	0.063416	0	2.1545	0
ARHGEF17	0	11.87	0.05535	0.50092	2.7264	1.5194	0
ARHGEF18	62.043	14.245	16.559	10.719	38.108	5.9049	17.359
ARHGEF19	9.0314	48.127	8.8529	8.7225	62.2	3.8362	0.42971
ARHGEF2	42.396	0.42	21.169	22.726	60.082	13.541	30.803
ARHGEF25	0	0	0	0.58514	0	0	0
ARHGEF26	4.4785	4.5136	3.0893	2.9949	0	0.4967	0.70843
ARHGEF26-AS1	126.07	42.993	127.33	160.83	62.184	43.899	112.66
ARHGEF28	0	0	1.3007	0.062229	21.097	0	3.3521
ARHGEF3	58.132	0	63.365	125.53	75.885	24.108	253.21
ARHGEF3-AS1	0	0	0.43419	0.04724	0	0.61518	0
ARHGEF33	0.10483	0	0	0.087449	0	0	0
ARHGEF35	0.22259	0.4625	1.8681	2.0423	3.7628	0.0045124	0
ARHGEF37	0	0	0	0.017816	0	0	0
ARHGEF38	0	0	0.047593	0.42264	0	0	0
ARHGEF38-IT1	0	0	0	0.034164	0	0	0
ARHGEF39	10.354	1.3363	13.438	10.651	10.77	5.0524	27.745
ARHGEF4	0	0	1.0754	1.7775	0	0	0
ARHGEF40	0	44.854	1.0627	0.976	0	10.775	5.1347
ARHGEF5	0	1.6825	1.5566	1.1885	0.99275	0	0
ARHGEF6	36.43	6.9148	72.489	69.261	22.677	28.269	45.919
ARHGEF7	63.554	7.1789	22.166	28.078	8.5225	12.592	10.458
ARHGEF9	6.2003	13.14	10.964	10.719	0	3.4185	5.069
ARID1A	20.945	22.17	20.927	19.939	9.2426	17.699	19.268
ARID1B	14.781	3.2074	12.428	10.887	9.5309	3.1228	19.815
ARID2	14.489	9.9574	25.134	18.438	17.827	6.4983	50.597
ARID3A	2.6734	4.7448	0.34049	1.2355	0	4.5238	0
ARID3B	31.068	0.21875	29.772	22.839	33.176	4.7275	10.629
ARID3C	0	0	0	0	0	0	0
ARID4A	46.374	6.18	34.999	39.848	28.662	15.274	36.86
ARID4B	66.613	20.047	86.64	91.459	39.875	22.875	40.837
ARID5A	19.893	38.058	197.93	234.29	42.389	69.404	212.29
ARID5B	60.067	126.57	129.95	71.165	79.799	19.142	35.442
ARIH1	6.8816	2.3562	9.6448	19.38	2.3437	10.988	26.983
ARIH2	53.532	48.111	59.25	65.127	48.412	48.929	135.13
ARIH2OS	37.659	4.3574	31.965	37.072	14.976	16.913	42.216
ARL1	33.382	96.173	14.072	27.71	27.357	26.777	73.916
ARL10	0.93822	0	4.1123	0.41215	0	0.064881	40.465
ARL11	34.722	0.5325	9.2255	7.3981	5.1847	17.809	8.1112
ARL13A	0	0	0.059091	0.058462	0	0	0
ARL13B	0.10032	7.3328	1.9215	6.2368	9.8972	6.064	0
ARL14	0	0	0	0.0083602	0	0	0
ARL14EP	47.986	61.299	47.683	39.846	0	13.303	27.003
ARL14EPL	0	0	0.3635	0.90022	0	0	0
ARL15	8.7567	0.3	11.391	15.634	47.442	10.871	1.9455
ARL16	61.428	20.602	82.605	56.227	99.443	28.508	29.897
ARL17A	45.154	1.375	55.453	58.279	32.954	15.62	57.65
ARL17B	18.525	4.8925	21.149	30.935	23.915	20.213	5.5957
ARL2	38.799	218.35	25.638	75.82	254.33	68.582	20.58
ARL2-SNX15	0	0	0	0.12028	0	0	0
ARL2BP	45.748	131.87	86.868	68.98	76.176	45.593	78.489
ARL3	5.1168	14.808	7.6233	15.652	3.1174	3.8197	17.543
ARL4A	25.747	1.9712	24.727	10.568	165.99	29.69	10.056
ARL4C	34.524	20.067	124.47	80.12	24.273	30.073	319.31
ARL4D	0.46594	96.567	11.483	1.6668	0	0.51681	17.472
ARL5A	25.745	26.441	16.52	33.859	15.958	41.879	1.6765
ARL5B	23.938	8.4829	7.8767	12.331	0.69182	25.364	0.16
ARL5C	0	0	0.56335	0.46287	0	0	0.83391
ARL6	1.9082	0.585	4.8304	5.0044	0	0	0.69552
ARL6IP1	147.67	98.282	219.6	364.23	167.54	198.36	217.37
ARL6IP4	137.41	193.18	155.03	123.01	155.84	167.7	144.68
ARL6IP5	245.07	216.09	430.37	358.32	65.576	228.24	366.43
ARL6IP6	24.043	1.2788	24.861	39.186	32.301	12.385	24.487
ARL8A	1.911	0.22	4.1849	2.8286	0	5.8819	6.9752
ARL8B	46.111	59.679	70.778	84.955	96.473	111.97	34.298
ARL9	0	0	0.22086	0.053499	18.292	0	0
ARMC1	44.679	16.231	18.213	27.761	15.342	10.366	25.292
ARMC10	24.787	15.918	18.033	33.789	25.365	13.294	16.789
ARMC12	0	25.821	1.8017	1.7293	0	0	0
ARMC2	1.6155	0	1.5358	2.8833	0	1.3585	0.70322
ARMC3	0.26031	0	0.031697	0.11277	0	0	0
ARMC4	0	0	0.033211	0.14281	0.30727	0	0.23291
ARMC5	2.0225	0	7.0491	6.3357	6.1555	2.9743	11.804
ARMC6	12.645	98.941	55.228	27.946	14.976	12.409	53.065
ARMC7	19.837	0	23.85	19.416	1.009	7.2608	5.1557
ARMC8	47.634	22.212	41.09	62.072	12.567	23.06	53.471
ARMC9	7.6142	13.426	10.247	10.864	3.3937	5.7762	5.4779
ARMCX1	0.084511	15.284	0.4206	2.9178	11.833	7.9427	15.358
ARMCX2	32.769	130.23	0.1377	13.625	58.807	3.8591	19.681
ARMCX3	22.736	38.835	19.936	46.449	24.648	26.864	48.137
ARMCX4	0.19757	30.709	1.0253	2.9307	1.54	0.90914	0.028709
ARMCX5	4.9254	0.29875	26.041	10.976	0	1.746	2.8366
ARMCX5-GPRASP2	0	1.8476	0.37899	0.33058	0	0.22964	1.0094
ARMCX6	73.662	104.68	52.654	59.173	19.86	42.135	11.052
ARMS2	0	0	0	0	0	0	0
ARNT	8.3383	22.596	25.582	64.252	6.5337	25.065	27.231
ARNT2	1.3255	0	0.23339	0.53374	0	0.025244	0
ARNTL	1.7841	11.505	53.537	31.756	0	5.2189	53.899
ARNTL2	3.5942	5.1224	5.7213	5.0652	15.041	4.1865	3.7985
ARPC1A	105.15	296.69	55.61	50.973	240.25	107.49	24.918
ARPC1B	491.43	398.42	661.61	563.31	575.22	694.88	667.7
ARPC2	920.69	626.97	1035.7	1213.2	480.67	1065.3	1719
ARPC3	944.21	437.1	686.39	665.25	537.76	991.59	739.32
ARPC4	329.31	214.51	385.49	360.58	163.05	309.64	436.11
ARPC4-TTLL3	6.9457	12.694	5.6967	6.598	13.247	4.2867	2.2714
ARPC5	177.62	82.841	233.99	284.26	137.79	418.45	389.82
ARPC5L	118.09	142	99.202	222.57	125.84	25.028	313.85
ARPP19	67.742	17.999	77.771	105.01	37.798	45.447	105.84
ARPP21	0.033868	0	0.28565	0.81451	0	0	0
ARR3	0	0	0	0.11587	0	0	0
ARRB1	1.5255	10.747	4.3603	2.0404	28.933	11.077	5.9792
ARRB2	10.681	0.15625	17.96	8.878	0	68.256	22.02
ARRDC1	39.056	34.311	100.11	89.682	28.709	67.292	130.89
ARRDC2	64.483	12.677	29.655	28.232	38.972	48.155	53.909
ARRDC3	110.56	64.031	54.138	167.25	46.411	77.341	77.137
ARRDC3-AS1	35.601	10.396	45.822	50.14	10.445	15.378	43.801
ARRDC4	0	5.4012	0	0.40726	0	1.6452	0.56231
ARRDC5	4.6849	0	11.864	19.656	0	8.3638	11.877
ARSA	27.137	23.786	39.895	47.851	16.329	28.942	43.657
ARSB	4.5769	14.858	5.664	7.6643	9.4502	15.153	8.4759
ARSD	12.803	5.4012	3.9418	4.9433	33.606	6.551	8.6703
ARSE	0	0	0.24219	0.13152	0	0	0
ARSF	0.39223	0.13625	0.43851	0.32696	0	0.12524	0.056453
ARSG	21.099	0	7.1133	18.002	9.5003	5.5944	9.6777
ARSH	0	0	0	0.18372	0	0	0
ARSI	0	30.817	0.75696	0.052669	0.88457	0	0
ARSJ	0	1.2362	0	0.3723	0	0.4061	0
ARSK	3.6872	13.829	5.1716	7.7601	1.1	2.9508	4.6175
ART1	0	0	0	0.16919	0	0	0
ART3	1.077	0	0.23637	0.27323	0	0	0
ART4	0	0	1.0677	0.38977	6.7246	0	0
ART5	0	0	0.99736	0.048929	0	0	0
ARTN	0	0	0	0.052881	0	0	0
ARV1	50.418	7.4085	20.673	30.145	103.29	25.398	2.1875
ARVCF	0	0	0.009212	0.046802	0	0.71722	1.389
ARX	0	0	0	0.50777	0	0	0
AS3MT	18.193	15.618	23.776	25.852	17.394	9.6966	13.607
ASAH1	109.09	19.934	40.439	48.46	92.226	772.27	74.249
ASAH2	1.1233	0.70124	0.3386	0.85334	0	0	0
ASAH2B	7.8057	15.481	3.238	7.7492	0	0	0
ASAP1	25.168	14.611	9.6765	14.805	38.65	18.074	25.965
ASAP1-IT1	1.3275	0	0.54293	3.1352	0	2.6152	0
ASAP2	0.61096	14.676	0.46746	0.2191	7.5852	0.21719	0
ASAP3	2.3612	47.692	0.086182	0.91287	52.372	3.5708	0
ASB1	6.5601	6.2875	4.6394	11.562	0	1.1518	6.3815
ASB10	0	0	0	0.48266	0	0	0
ASB11	4.0218	0.65749	9.5684	10.253	12.068	3.2669	6.2021
ASB12	8.2431	0	0	0.90554	0	1.7878	0
ASB13	27.307	40.583	3.1877	0.78898	0	15.464	0
ASB14	5.8815	0	0.41726	0.61153	0	0.74851	0.15
ASB15	0.11919	0	0.19527	0.57459	0.64909	0	0
ASB16	4.2129	4.2861	8.5444	6.5889	2.1054	2.3983	10.663
ASB16-AS1	63.273	7.0737	56.471	58.98	32.165	12.31	56.102
ASB17	0	0	0	0	0	0	0
ASB18	0	0	0.06509	0.0034387	0	0	0
ASB2	5.8415	0	48.967	87.761	0	0.63147	19.377
ASB3	14.623	5.7727	34.699	18.724	0	3.5612	26.683
ASB4	2.3075	0.52625	4.0808	3.968	4.0446	1.726	4.1943
ASB5	0	0	0.083941	0.057636	0	0	0
ASB6	9.9743	24.423	28.643	37.781	45.994	21.007	48.364
ASB7	6.4881	15.861	22.785	25.913	0.73091	7.3393	12.822
ASB8	33.997	93.453	59.757	61.03	41.736	29.428	69.973
ASB9	0.048383	2.7512	0	0.038738	1.1246	2.0742	0
ASB9P1	0	0	0	0	0	0.76654	0
ASCC1	28.865	37.555	48.626	45.283	5.0139	16.302	0.3813
ASCC2	26.842	39.763	43.811	63.268	44.259	51.901	60.475
ASCC3	34.243	11.693	25.177	28.643	15.145	9.0885	2.7402
ASCL1	0	0	1.076	0.057714	0	0	0
ASCL2	0	0	0	0.58405	0	1.5159	0
ASCL3	0	0	0.74236	0.304	0	0.83766	0
ASCL4	0.046127	0	0	0.29311	0	0	0
ASCL5	0	0	0	0	0	0	0
ASF1A	6.0709	34.758	52.086	59.354	19.581	2.5349	21.282
ASF1B	12.753	0	10.828	15.658	0	5.1098	0
ASGR1	0	0	0	0.049816	3.0837	24.797	0
ASGR2	0	0	0.076723	0	0	15.185	0
ASH1L	23.344	10.296	29.402	32.085	26.047	12.92	41.289
ASH1L-AS1	0.30613	1.5424	8.256	8.5371	0	4.4872	13.895
ASH2L	22.252	2.5987	23.883	24.181	39.844	17.807	37.62
ASIC1	0	1.1962	0	0.98606	0	0.23049	0
ASIC2	0	0	0.14145	0.042862	0	0	0
ASIC3	0	0	2.3311	0.50363	0	0	0.27387
ASIC4	0	0	0	0.10311	0	0	0.11936
ASIC5	0	0	0.15843	0.0072356	0	0	0
ASIP	0.24981	0	0	0.40104	0	2.1682	0
ASL	1.423	72.116	12.612	27.972	162.11	31.808	59.729
ASMT	1.6549	0	1.2191	1.9883	0	0.16939	23.844
ASMTL	55.533	47.215	50.334	41.601	160.31	13.772	39.296
ASMTL-AS1	22.986	10.829	10.923	10.418	4.4063	7.5063	10.885
ASNA1	27.367	74.552	65.39	55.382	72.773	45.233	96.376
ASNS	14.383	6.6976	34.16	25.324	1.8428	9.4078	5.0696
ASNSD1	37.148	14.204	41.778	53.132	23.903	42.602	11.107
ASPA	0	41.62	0	0.074571	0	0	0
ASPDH	0	0	0	0.2098	0	0	0
ASPG	0	0	0.0047927	0.059088	0	0	0
ASPH	13.477	57.548	9.4374	20.2	77.017	61.651	9.7447
ASPHD1	0	2.525	0	0.013815	0	0	0
ASPHD2	4.0111	0	1.5848	1.639	0	4.1721	0
ASPM	2.0031	0	1.2426	2.5126	0	1.5299	4.0237
ASPN	0.19595	330.69	0.7108	1.3791	0	0.17122	0
ASPRV1	0	0	2.1143	0.59223	0	0	4.4483
ASPSCR1	20.912	51.977	26.285	19.124	10.334	9.2299	0
ASRGL1	3.9043	0	4.2568	0.76612	21.068	12.707	2.6065
ASS1	2.605	220.86	5.3	7.4399	135.82	0.72853	32.985
ASTE1	24.258	0	27.891	31.969	17.531	5.3512	35.032
ASTL	0	0	9.9755	3.3721	0	2.8647	0
ASTN1	0	8.5151	0.071273	0.1051	0	0	0
ASTN2	499.79	178.36	581.92	712.4	247.06	158.5	425.8
ASUN	13.391	89.469	10.39	23.193	19.084	11.616	22.915
ASXL1	22.538	0	13.924	12.463	2.5682	1.9135	16.054
ASXL2	6.1628	0	18.882	39.854	10.836	4.0105	13.024
ASXL3	0.64322	0	0.56231	0.048893	3.1991	0	0
ASZ1	2.1436	0.795	2.5021	2.8114	3.2983	1.6706	2.0575
ATAD1	81.232	18.555	58.189	54.027	8.561	26.66	61.75
ATAD2	7.1829	7.4199	13.173	16.873	0	2.9474	6.0806
ATAD2B	23.498	3.5912	23.352	24.096	8.122	8.7163	40.285
ATAD3A	0	14.345	2.7299	12.292	7.8583	6.1603	0.93451
ATAD3B	7.7129	4.285	12.32	17.482	2.3028	7.5542	2.3966
ATAD3C	6.3833	2.7012	10.942	9.5261	9.5346	2.3433	5.7786
ATAD5	8.2185	0.13	3.9926	7.611	0.92452	1.6353	7.1018
ATAT1	5.2673	19.265	6.1029	12.544	51.075	1.5524	2.9205
ATCAY	26.655	7.7025	33.846	34.489	22.101	12.603	32.32
ATE1	19.578	1.7037	21.055	15.5	11.478	4.4266	20.98
ATF1	20.114	4.0363	9.9724	17.439	2.2465	10.523	47.222
ATF2	34.172	17.791	46.218	66.741	12.568	25.387	64.838
ATF3	4.1109	436.45	26.011	32.369	238.45	261.65	0
ATF4	196.19	348.84	302.21	243.85	463.93	183.5	288.05
ATF5	0.61145	18.3	2.7972	1.8974	0	42.738	1.6304
ATF6	27.581	4.7875	17.896	26.96	45.473	27.662	24.76
ATF6B	76.654	106.54	94.263	72.297	37.14	49.52	163.03
ATF7	57.593	23.929	21.823	35.584	28.567	18.166	15.213
ATF7IP	196.17	69.951	132.84	152.6	41.546	42.537	88.943
ATF7IP2	25.471	0	12.421	13.785	0	1.3974	2.5504
ATG10	6.9511	5.5698	14.965	9.1332	11.306	3.0472	6.4716
ATG12	45.653	12.135	41.585	39.078	32.892	20.648	42.587
ATG13	10.756	26.173	30.205	32.134	22.572	10.966	8.8612
ATG14	20.458	0.855	16.784	17.834	24.483	7.7703	16.349
ATG16L1	6.3896	3.9363	53.281	29.12	64.919	9.3139	11.015
ATG16L2	38.625	39.858	19.158	25.872	36.63	38.733	30.824
ATG2A	2.8627	0.675	11.969	8.737	7.9638	6.0879	2.9801
ATG2B	6.8043	7.585	6.9736	7.2101	13.208	1.6606	4.7214
ATG3	64.886	153.02	150.02	133.57	211.02	254.8	184.37
ATG4A	5.9552	11.937	8.6417	15.978	32.254	2.7829	0.055162
ATG4B	35.272	8.1626	54.814	47.598	57.559	21.229	10.988
ATG4C	25.115	0	2.9038	8.479	0	21.366	6.4443
ATG4D	7.0539	7.4675	6.3482	7.2334	0	4.9253	0
ATG5	31.704	20.443	36.996	52.095	18.857	24.367	19.15
ATG7	6.5292	12.809	21.956	17.326	17.983	37.56	6.5626
ATG9A	14.692	68.763	30.523	41.601	70.183	10.269	38.63
ATG9B	0	0	5.6365	3.462	3.0254	1.6498	0
ATHL1	34.992	62.582	68.807	177.56	9.9446	5.8306	49.81
ATIC	107.99	149.38	59.525	81.484	0	36.773	30.059
ATL1	11.05	22.51	0	5.0397	2.1354	0.0021952	0
ATL2	19.88	41.657	15.586	17.024	57.028	2.353	44.932
ATL3	7.1001	15.501	3.744	15.566	69.211	5.4691	18.179
ATM	33.484	4.2775	28.119	33.581	1.4091	5.1094	44.449
ATMIN	3.441	6.7902	6.7846	9.4219	11.729	0.87755	2.0267
ATN1	2.8221	16.745	4.3274	4.5986	11.85	3.0548	12.744
ATOH1	0	0	0	0	0	0	0
ATOH7	0	0	0	0	0	0	0
ATOH8	0	0	0.19497	0.044564	0	0.031098	0
ATOX1	35.885	173.41	74.651	36.55	179.62	228.63	133.49
ATP10A	0.069511	33.038	3.264	5.0731	0	3.7038	31.796
ATP10B	0	0	0.042363	0.21562	0	0.22584	0
ATP10D	21.994	10.672	2.9311	6.6558	13.772	4.1794	7.6868
ATP11A	5.916	5.4537	9.0703	3.1734	9.6457	9.0959	6.7141
ATP11B	11.415	2.9388	9.7019	16.624	0	4.5887	5.5459
ATP11C	4.3434	2.1488	5.7641	7.6994	7.8794	6.9795	0.71647
ATP12A	0	0	0.77977	0.065203	0	0	0
ATP13A1	43.716	23.112	30.745	31.789	5.7091	29.443	21.683
ATP13A2	0.51643	10.437	12.495	5.363	2.1255	5.9835	2.1342
ATP13A3	1.8755	0.8875	6.3841	6.703	5.7073	15.399	0.44905
ATP13A4	0	0	0.17027	0.94151	0	0	0
ATP13A5	0	0	0.083999	0.034093	0	0	0
ATP1A1	41.015	61.716	123.95	94.533	205.89	74.33	19.177
ATP1A1OS	9.2742	14.969	11.882	8.8902	18.393	4.7647	37.684
ATP1A2	1.3515	0.037499	2.0361	1.8101	2.3992	0.49866	1.5165
ATP1A3	0.039191	0	2.9964	7.5993	0	0	7.0189
ATP1A4	0	3.7863	2.7732	0.26143	0	0.094755	0
ATP1B1	0.10693	8.7622	16.574	4.4806	3.6937	60.096	14.477
ATP1B2	4.8267	1.5213	7.2872	6.1498	8.5129	2.0123	3.2811
ATP1B3	41.937	166.53	180.73	196.05	367.3	288.39	209.68
ATP1B4	5.5176	1.93	9.5884	10.256	4.8138	4.3822	11.21
ATP2A1	0.13225	2.0875	0.26297	0.075125	0	0	0
ATP2A2	1.0989	33.974	4.6384	3.9634	3.3519	9.9077	11.859
ATP2A3	67.229	0	43.655	38.489	4.6327	2.4635	53.193
ATP2B1	77.796	14.942	28.874	12.208	22.771	37.644	75.02
ATP2B2	0.078705	0	0.024545	0.091112	0	0	0
ATP2B3	0	0	0	0.00058913	0	0	0
ATP2B4	5.8069	18.757	44.982	45.565	24.672	2.886	71.265
ATP2C1	14.277	66.927	12.888	22.067	1.2254	32.297	5.0491
ATP2C2	1.015	0.24249	0.094001	1.1694	0	0	0
ATP4A	0	0	0.17424	0.01216	0	0	0
ATP4B	0	0	0	0.25815	0	0	0
ATP5A1	386.01	452.6	378.47	534.05	336.94	287.02	345.05
ATP5B	395.09	553.81	541.11	699.94	316.17	360.93	504.02
ATP5C1	227.95	200.03	220.93	280.19	192.6	255.17	243.31
ATP5D	239.37	253.38	204.39	169.54	139.12	117.03	175.34
ATP5E	488.96	347.02	578.78	550.48	397.58	837.15	529.36
ATP5EP2	16.853	6.7038	17.222	17.929	37.458	30.381	20.029
ATP5F1	195.01	195.11	178.52	169.41	192.15	175.99	166.53
ATP5G1	138.48	162.79	132.72	112.21	69.072	66.32	199.14
ATP5G2	424.06	452.71	396.43	415.29	341.4	388.84	317.35
ATP5G3	120.13	108.3	69.042	83.804	52.174	97.691	110.6
ATP5H	151.31	206.61	195.74	162	197.07	206.27	148.39
ATP5I	140	204.44	167.18	123.55	65.897	204.47	142.29
ATP5J	104.79	201.82	123.64	138.44	145.3	97.116	157.9
ATP5J2	95.094	132.8	147.98	124.04	46.652	162.23	111.46
ATP5J2-PTCD1	1.1972	0.47374	1.2868	1.6884	0	0.87682	1.041
ATP5L	146.05	100.32	203.76	169.4	139.02	173.36	187
ATP5L2	17.129	6.5199	12.673	4.7405	7.4482	4.8777	8.1726
ATP5O	259.54	422.23	388.79	246	152.8	277.61	222.41
ATP5S	12.005	15.778	29.903	31.091	30.65	13.014	24.888
ATP5SL	12.798	154.23	44.304	53.968	64.746	37.312	131.38
ATP6AP1	79.078	207.14	107.98	129	139.69	365.68	72.173
ATP6AP1L	0	0	0	0.55259	0	1.1982	0
ATP6AP2	168.27	169.76	166.5	192.52	99.055	250.31	82.377
ATP6V0A1	51.168	18.052	3.8794	0.9117	15.033	49.832	0.2013
ATP6V0A2	10.747	6.6688	9.6437	25.147	12.39	2.1586	7.1395
ATP6V0A4	0	0	0.043333	0.19225	0	0.0057315	0.23356
ATP6V0B	139.57	289.5	232.2	145.8	247.71	677.49	227.02
ATP6V0C	38.345	31.772	47.822	23.912	53.147	139.9	40.823
ATP6V0CP3	0	0	0	0	0	0	0
ATP6V0D1	99.156	143.91	60.332	116.95	104.49	301.71	196.02
ATP6V0D2	4.9189	0.6925	7.2723	6.9005	3.6774	3.4533	5.2566
ATP6V0E1	514.82	448.7	520.47	388.68	519.13	520.01	499.47
ATP6V0E2	18.341	8.2539	115.06	76.072	0	19.195	46.505
ATP6V0E2-AS1	0.31127	0	1.1921	0.64323	0	0.1806	0
ATP6V1A	19.993	48.43	38.451	58.793	32.893	80.481	70.839
ATP6V1B1	0	2.7737	0.22994	0.29377	0	0	0
ATP6V1B2	59.51	33.404	54.03	66.601	14.949	299.77	0.074519
ATP6V1C1	26.588	7.8125	7.5532	19.89	8.8771	27.907	29.297
ATP6V1C2	1.4041	0	0	1.3113	22.862	0	0
ATP6V1D	4.1458	43.492	60.326	40.283	40.343	21.478	52.855
ATP6V1E1	61.88	172.95	106.72	125.89	117.31	110.39	53.476
ATP6V1E2	0.5693	0	0	0.28453	0	0	0
ATP6V1F	156.25	255.41	185.06	146.45	269.56	469.21	344.31
ATP6V1G1	204.97	101.8	177.46	135.76	51.592	154.96	187.96
ATP6V1G2	0	0	4.0212	0.76009	0	1.146	0
ATP6V1G2-DDX39B	0	0	1.0096	0.02396	0	0	0
ATP6V1G3	0.24836	0	0	0.53378	0	0	0
ATP6V1H	16.523	44.077	39.482	46.238	141.73	49.096	0
ATP7A	4.496	7.2849	9.7272	11.69	3.8483	4.4812	1.5284
ATP7B	0	3.4326	0.039212	0.071313	0	1.1495	0
ATP8A1	14.36	0	8.8786	29.207	1.7536	0.92705	5.5127
ATP8A2	0	0	0.14673	0.80812	2.2346	0	0.075808
ATP8B1	11.021	1.4038	3.2649	3.7641	40.252	1.0936	2.4946
ATP8B2	1.6435	4.9739	38.79	11.897	9.6755	1.6478	18.366
ATP8B3	0	0	1.0393	0.56352	0	1.0136	0
ATP8B4	0	0.04875	0.079212	8.639	0	13.79	52.967
ATP8B5P	0	0.081249	2.7791	0.80564	0	0.019878	0.05355
ATP9A	0	4.1024	1.8852	6.1396	0.15727	0.06634	6.191
ATP9B	6.3574	9.1985	9.4102	20.321	37.787	16.264	41.972
ATPAF1	4.069	43.434	4.8163	13.488	0	7.2919	0
ATPAF2	24.97	7.0203	24.06	17.452	20.446	19.105	44.166
ATPBD4	4.3769	0	20.13	16.13	7.9191	9.1695	2.8277
ATPBD4-AS1	0	0	0.082605	0.52301	0	0.17476	0
ATPIF1	271.28	240.44	299.24	269.24	274.75	172.82	348.75
ATR	11.602	3.1188	18.923	16.061	0.33274	9.2776	5.9151
ATRAID	213.04	328.11	236.58	206.83	300.16	317.71	271.1
ATRIP	1.0613	7.816	5.7602	7.3451	6.211	0.62782	0
ATRN	1.1046	8.9786	3.0255	9.5821	28.339	17.407	1.3904
ATRNL1	0.031612	0	2.5797	0.11495	0	0.18769	0
ATRX	71.538	16.869	50.425	73.735	41.902	14.024	55.759
ATXN1	4.7242	9.0236	11.516	24.053	5.112	3.074	1.6139
ATXN10	71.086	136.76	78.315	82.293	53.784	23.743	75.939
ATXN1L	14.823	2.7449	3.0986	13.58	3.7111	4.4066	13.235
ATXN2	9.8076	9.0885	9.9585	23.255	7.3855	9.3011	10.132
ATXN2L	23.232	18.342	23.142	21.415	2.091	15.785	28.995
ATXN3	26.412	12.07	22.55	21.192	40.662	10.345	31.183
ATXN3L	0	0	0	0.031246	0	0	0
ATXN7	2.41	6.2599	34.455	23.941	6.492	9.2585	19.853
ATXN7L1	7.7326	9.3312	22.278	17.935	6.96	3.9766	18.542
ATXN7L2	12.668	0	9.8077	5.2833	2.3673	0.18915	0
ATXN7L3	12.004	0.75	7.5956	8.1612	0	1.7272	24.288
ATXN7L3B	66.057	71.07	82.97	62.223	20.772	22.492	43.584
ATXN8OS	0.097253	0	0.21376	0.11187	0	0.0093902	0.016775
AUH	22.458	12.998	22.568	26.183	2.8108	10.535	28.618
AUNIP	2.8923	0.62	3.1175	5.1634	2.0001	1.8377	3.0478
AUP1	170.95	196.23	182.43	163.79	168.8	183.62	151.16
AURKA	1.6985	45.69	6.9924	8.7201	17.795	8.4388	2.0194
AURKAIP1	119.66	244.06	148.23	106.56	45.692	80.817	194.55
AURKAPS1	0	0	5.3433	6.7066	0	0.30207	11.2
AURKB	11.458	0	3.6641	8.8017	0	16.661	0
AURKC	0	0	0	0.36192	0	8.82	0
AUTS2	4.8085	13.197	1.4674	3.1157	2.6738	0.12049	37.15
AVEN	0.030322	2.9926	0.26406	0.80014	3.7719	0	0
AVIL	0.58495	14.054	0.58623	0.71774	0	0.2061	0.23226
AVL9	55.128	0	25.196	40.484	13.799	18.809	46.414
AVP	0	0	0	0.026757	0	0	0
AVPI1	2.4191	10.546	6.9811	13.42	0	30.453	56.05
AVPR1A	0.69787	0.52	0.73561	2.401	0.55365	0.43536	1.2307
AVPR1B	1.5778	0	0	0.063541	0	0	0
AVPR2	0	0	0	0.29171	3.9582	0.10829	0
AWAT1	0	0	0	0	0	0	0
AWAT2	0	0	0.70499	0.011498	0	0	0
AXDND1	0	0	0.23824	0.094642	0	0.22402	0
AXIN1	8.7539	21.458	8.0776	11.024	0.51637	8.5872	48.165
AXIN2	8.6089	8.0239	1.5989	0.07149	0	0	0
AXL	8.8816	204.64	18.827	27.74	6.3592	175.74	12.28
AZGP1	0	0	0.058208	0.55861	0	0	0.24711
AZGP1P1	0	0	0.11594	0.89181	0	0	0
AZI1	9.3713	13	8.8219	2.6693	13.855	7.813	0.44355
AZI2	11.643	39.763	35.016	47.797	50.689	38.531	39.567
AZIN1	30.825	69.862	42.837	86.615	16.06	41.545	26.991
AZU1	0	0	0.06703	0.012576	0	3.009	0
B2M	12712	8206.5	22393	28881	10345	20072	19997
B3GALNT1	2.1166	1.2287	1.1473	1.0141	2.6855	6.8101	0.21936
B3GALNT2	5.1949	13.702	4.1906	9.0081	19.849	3.8885	21.685
B3GALT1	0	0	1.3042	0.089749	0	0	0
B3GALT2	0.062256	0	1.9985	4.7889	0	0.57086	2.2055
B3GALT4	32.621	35.497	17.512	14.956	0	29.722	19.452
B3GALT5	0	0	0	0.067048	0	0	0
B3GALT6	0	45.288	1.1881	2.4957	0	2.7405	4.4582
B3GALTL	11.315	21.012	0.19915	8.1844	17.776	2.9506	21.231
B3GAT1	0	0	3.203	0.37899	0	0	10.582
B3GAT2	0	0	0	0.021278	0	0	0
B3GAT3	50.275	107.48	91.973	48.784	65.19	31.534	153.08
B3GNT1	23.376	0.53625	9.806	10.774	0	4.3085	0
B3GNT2	8.7174	2.6975	28.389	87.205	17.906	8.4907	66.525
B3GNT3	0.11967	0.092495	0.18564	0.31155	4.8681	0.096584	0.042581
B3GNT4	0	0	0	0.053071	0	0	0
B3GNT5	0	0	2.6018	0.92681	8.7357	45.589	0
B3GNT6	7.2349	6.9426	10.676	13.351	6.4264	4.4817	14.154
B3GNT7	4.6162	0	1.6511	1.6458	0	31.638	214.35
B3GNT8	0	9.205	0.011697	0.1099	0	15.181	0
B3GNT9	0.11483	5.5123	5.2998	0.34902	1.0373	0.65256	0
B3GNTL1	0.84147	57.526	29.444	11.093	1.599	9.3268	14.564
B4GALNT1	0	10.922	0.05897	0.24406	0	0.0046343	0
B4GALNT2	0	0	0	0.013041	0	0	0
B4GALNT3	0	0	2.9804	1.7214	0	0.58631	9.1192
B4GALNT4	0	1.6213	0.27661	0	0	0	0
B4GALT1	125.67	151.26	86.826	53.935	61.309	98.577	119.25
B4GALT2	0	5.0161	1.7506	0.44209	11.22	0.87888	0
B4GALT3	65.136	34.905	66.751	62.274	75.984	23.443	26.854
B4GALT4	9.7103	4.8102	17.934	14.834	21.521	11.886	47.413
B4GALT5	5.2651	5.0125	6.843	4.1195	11.462	8.8315	11.981
B4GALT6	0	1.1287	0.070122	2.1042	2.52	0.41537	9.1857
B4GALT7	31.882	32.247	11.918	18.168	18.874	12.69	0
B9D1	25.986	8.7288	1.8317	2.5018	0	0.14621	38.464
B9D2	0.73092	32.549	33.186	17.251	13.342	9.7819	0
BAALC	0	0	0.13291	0.46061	0	0	1.4223
BAAT	0.0054835	0	1.1797	0.53754	0	0.12805	0.16162
BABAM1	115.67	109.91	57.687	109.77	109.49	64.308	46.184
BACE1	1.9625	19.298	0.32866	1.5205	4.3582	1.3114	7.7934
BACE1-AS	6.5119	1.3274	21.904	15.591	44.795	3.9673	8.9055
BACE2	50.623	12.955	0.73438	1.4063	71.337	1.864	4.4049
BACH1	40.688	6.9864	13.566	13.884	0	61.935	23.05
BACH2	18.474	0	2.7584	2.2297	0	0.47156	1.2575
BAD	28.299	67.681	49.622	47.95	67.507	68.05	68.914
BAG1	7.5806	0.28999	9.6947	8.7128	14.895	12.725	12.662
BAG2	19.051	20.836	5.6536	3.1833	0	0.66498	24.918
BAG3	3.9646	50.367	11.552	17.653	36.218	9.4385	0
BAG4	11.385	3.7974	20.329	25.033	7.7283	26.228	12.336
BAG5	14.346	11.116	13.552	27.654	51.768	11.987	13.269
BAG6	13.084	37.693	17.494	11.755	38.736	14.454	10.929
BAGE	0	0	0.82217	0.6773	0	0.060852	0.42775
BAGE2	0	0	0.052606	0.02171	0	0	0
BAGE3	0	0	0.052606	0.02171	0	0	0
BAGE4	0.017258	0	0.042122	0.059001	0	0.029389	0.031614
BAGE5	0.73915	0	1.9435	1.0354	0	0.59147	1.1565
BAHCC1	0	0.8	0.11091	0.14526	4.8655	0	0.011291
BAHD1	0	0	1.9171	4.8236	4.7582	3.2502	10.548
BAI1	0	0	0	0.14688	0	0.070242	0.020646
BAI2	0.60478	0	0.11376	0.056556	0	0	0
BAI3	0.045159	0	0.030909	0.13773	0	0.0070732	0
BAIAP2	3.5134	56.939	0.89491	3.8465	14.549	25.328	5.2451
BAIAP2-AS1	8.3974	4.7475	11.437	11.272	8.9847	6.0924	18.723
BAIAP2L1	0.30644	0	2.7959	0.8255	7.4181	0.45756	0.15871
BAIAP2L2	0	4.3975	0.050667	0.25844	0	0.35134	0
BAIAP3	8.3844	0	2.3555	1.1961	0	0	19.276
BAK1	22.435	65.615	49.515	69.473	92.917	66.994	126.51
BAMBI	0.99578	1.8749	0.36311	1.1543	0	4.0818	0
BANCR	0	9.7712	4.6865	5.0759	0	1.0859	16.989
BANF1	65.797	120.28	76.575	94.874	143.5	84.584	108.39
BANF2	0	0	0	0.059235	0	0	0
BANK1	450.21	5.0237	0.25812	0.16566	0	3.5	12.131
BANP	5.5999	0	26.128	31.203	31.617	10.803	65.455
BAP1	9.4379	31.054	23.824	29.345	34.724	6.2258	45.427
BARD1	6.9105	0	32.603	23.226	0	5.9672	18.092
BARHL1	0	0	0	0.023479	0	0	0
BARHL2	0	0	0	0.12854	0	0	0
BARX1	0	0	0	0	0	0	0
BARX2	0.089835	0	0.43897	4.0511	0	0.057559	0
BASP1	20.982	16.996	2.3781	0.58328	0	13.058	0
BASP1P1	0	0	0	0.20945	0	0	0
BATF	18.676	0	292.94	230.82	0	40.771	205.9
BATF2	0	0.44124	0.04194	1.0641	0	18.622	0
BATF3	0	0	0.46293	1.9201	14.982	12.518	0
BAX	42.097	12.887	71.86	30.452	15.167	53.395	87.918
BAZ1A	25.403	12.952	24.049	28.55	20.777	22.414	1.0971
BAZ1B	24.158	23.005	16.3	20.216	18.662	6.0025	37.35
BAZ2A	19.412	20.348	19.015	23.494	29.508	11.001	14.06
BAZ2B	10.372	12.968	23.41	21.743	60.93	22.247	26.416
BBC3	0	0	3.0422	1.4724	0	1.2897	0
BBIP1	13.476	2.8512	18.983	29.199	5.8182	9.9997	16.732
BBOX1	0	0.6025	0.056848	0.039986	0	0	0
BBS1	1.4005	12.515	12.696	4.4371	6.1928	1.7263	0.096132
BBS10	0.79303	0	7.0951	5.72	14.78	2.3422	0
BBS12	0	0	8.2404	5.0297	0	0.039877	17.237
BBS2	32.778	16.81	44.655	34.361	55.582	18.811	79.634
BBS4	0.40707	25.79	12.263	31.313	15.769	7.0314	10.667
BBS5	12.492	9.858	22.702	24.396	11.906	6.2575	11.642
BBS7	7.0373	5.1263	2.1819	17.352	14.943	0.99221	19.683
BBS9	20.756	7.9035	9.8634	6.2429	14.291	0.83367	0.059034
BBX	27.888	6.7249	23.318	30.959	12.699	8.9857	13.545
BCAM	0	0	0	0.067538	136.23	0.022073	0
BCAN	3.9913	10.489	1.1108	3.983	0	0.50058	0
BCAP29	3.2739	10.903	9.2306	16.438	19.689	14.23	7.7116
BCAP31	188.84	123.43	222.83	202.53	269.9	255.09	296.37
BCAR1	0.09387	0	0.3854	1.1162	93.051	0.21976	0
BCAR3	16.528	3.7151	1.0519	0.022407	4.1918	6.6558	0
BCAR4	1.2944	0	0.59929	0.065379	0	0.058413	1.8242
BCAS1	3.8181	16.13	6.5475	5.8734	1.6691	1.4647	4.5975
BCAS2	80.829	58.424	149.06	102.72	12.714	61.22	111.12
BCAS3	2.0183	18.355	20.859	30.453	28.288	5.8491	9.4082
BCAS4	161.22	0	24.023	71.027	4.9518	0.49097	34.307
BCAT1	0.4132	34.668	1.6059	4.3494	0.61365	19.049	1.9182
BCAT2	7.9208	8.9999	10.217	16.812	56.884	4.9689	27.592
BCCIP	75.391	15.528	34.487	59.236	54.878	38.717	105.81
BCDIN3D	13.963	10.049	13.459	13.102	2.131	5.6992	0.76583
BCDIN3D-AS1	4.6176	1.9012	6.0654	7.8939	4.0409	2.5405	6.8166
BCHE	0	6.8399	0.5794	1.5104	0	1.011	0
BCKDHA	69.425	16.061	66.312	70.181	6.1247	74.695	72.149
BCKDHB	54.213	34.941	26.028	29.55	6.6309	13.826	36.556
BCKDK	19.334	47.201	28.741	46.176	40.116	154.86	61.432
BCL10	64.588	12.242	25.29	26.709	44.378	22.62	13.995
BCL11A	207.14	0	1.2054	0.084536	0	7.3684	1.0652
BCL11B	0	0.55499	49.913	33.753	0	0.021463	10.143
BCL2	24.415	2.8688	21.304	14.385	0	2.2329	14.982
BCL2A1	57.95	0	97.853	55.98	0	701.09	48.149
BCL2L1	9.6458	46.051	34.515	23.419	39.158	28.046	44.02
BCL2L10	0	0	0	0.11821	0	0	0.40968
BCL2L11	40.659	3.2961	35.312	58.216	33.494	13.322	34.801
BCL2L12	13.479	0	7.5779	7.4673	6.6738	13.607	6.0153
BCL2L13	6.1338	35.323	25.693	17.92	14.15	8.6407	0.76193
BCL2L14	0	0	2.4509	2.977	0	0.48244	0
BCL2L15	9.929	2.7637	11.746	13.103	6.44	5.2909	10.306
BCL2L2	0	2.9263	0	0.71528	7.6338	0.94377	0
BCL2L2-PABPN1	12.44	33.441	19.377	18.017	36.686	14.396	31.197
BCL3	4.3757	30.174	13.937	12.255	46.066	17.189	1.3058
BCL6	63.887	49.909	37.85	44.022	17.64	46.798	26.591
BCL6B	0	0	0	0.19283	39.875	0	0
BCL7A	6.6179	10.98	0.058061	0.76139	0.82367	0.18099	0.49292
BCL7B	5.2161	12.124	35.141	37.73	35.806	20.057	30.69
BCL7C	9.5846	0	3.9126	6.1967	0	2.9582	3.3335
BCL9	0.093548	3.0613	3.0092	1.379	7.8466	0.55916	2.547
BCL9L	3.5871	5.245	10.895	9.9152	5.0301	3.7772	21.018
BCLAF1	62.258	26.183	71.857	91.072	31.284	34.975	66.425
BCMO1	0	0	0	0.18937	0	0	0
BCO2	0.044514	0	1.0589	1.6707	0	0.43649	1.7332
BCOR	20.632	0	11.393	26.923	6.0091	3.3359	11.216
BCORL1	1.5283	0	1.2103	1.032	6.8809	0.3973	3.0449
BCORP1	0.1158	0	0.13921	8.4299	0	0.061463	10.36
BCR	0.11935	1.1813	8.8023	5.7848	29.023	1.4305	9.1754
BCRP2	1.9647	0	7.0667	2.7546	2.5627	0.38842	1.3903
BCRP3	0.69642	0.3675	1.7031	0.60749	0	0.35354	0.33679
BCS1L	0.64399	42.153	13.984	26.212	34.635	27.327	27.711
BCYRN1	16.066	102.86	31.952	25.018	0	25.538	50.678
BDH1	4.2584	1.605	4.6849	15.877	3.091	7.2275	15.489
BDH2	11.601	30.741	9.295	22.614	70.228	8.7591	9.4839
BDKRB1	0	13.865	0.013576	0.031383	0	0.025731	0
BDKRB2	0	0	0.32189	0	33.715	0	0.015161
BDNF	0	0	0.48351	0.075855	0	0.17926	0
BDNF-AS	4.0574	15.009	0.83606	1.1827	0	1.1782	0.93745
BDP1	16.615	11.57	14.44	16.488	17.039	7.1148	17.766
BEAN1	0.086285	1.055	0	0.60953	0	3.397	0
BECN1	84.838	114.56	79.851	123.06	104.45	56.243	158
BEGAIN	0	0	0	0.12699	0	0	0
BEND2	8.1023	3.1351	3.5593	3.2336	1.2509	1.4508	2.7582
BEND3	0.27821	0	0.16091	0.32697	0	0	0.45644
BEND3P3	9.3378	2.6525	5.8561	4.6176	1.0355	1.89	11.9
BEND4	12.663	0	1.4401	1.5785	0	0.044269	0
BEND5	26.076	4.421	0	1.447	0	2.2282	0
BEND6	0.27467	4.7613	1.0464	0.29452	0	0	0
BEND7	0	9.6374	0.26327	0.1578	1.4945	0	0
BEST1	0	0.2775	2.7404	2.9783	0	11.871	7.8664
BEST2	0	0	0	0.028584	0	0	0
BEST3	0	0	0	0.52147	0	0	0
BEST4	1.5127	0	0.40223	1.3737	0	0	0
BET1	14.245	7.531	4.6193	17.428	23.216	2.0873	0
BET1L	57.495	60.224	27.23	59.994	37.93	19.25	56.622
BET3L	0	0	0	0.50481	0	0	0
BEX1	0	0	0.034606	2.6451	0	52.906	0
BEX2	37.968	0	47.259	48.362	0	21.571	24.825
BEX4	15.84	19.748	43.256	64.016	0	55.554	111.42
BEX5	1.5178	0	11.629	4.9463	0	0	0
BFAR	29.846	21.097	40.518	41.415	57.509	7.0865	22.334
BFSP1	0	0	0.37714	0.70792	5.5026	0	0
BFSP2	3.6081	0	3.2369	1.6619	0	1.6541	0
BGLAP	0	0	0	0.38859	0	0.067072	0
BGN	0	1743	0.10042	0.21197	166.63	4.0478	0
BHLHA15	0	0	0	0.54583	0	0	0
BHLHA9	0	0	0	0	0	0	0
BHLHB9	0	0.076249	1.4394	2.8059	1.5318	0.40975	5.902
BHLHE22	0	0	0	0	0	0	0
BHLHE23	0	0	0	0	0	0	0
BHLHE40	26.142	96.68	99.296	115.26	166.78	84.49	338.79
BHLHE40-AS1	11.208	0	28.892	15.635	0	1.2619	6.3741
BHLHE41	3.1352	0.35499	0.36613	0.57722	0	16.106	0
BHMT	0	0	0.035697	0.037587	0	0	0
BHMT2	14.384	34.34	25.979	27.397	12.488	8.425	20.847
BICC1	0	43.6	0	0.12104	0	0	0
BICD1	21.882	1.3087	6.6177	8.2366	12.908	0.75927	6.9407
BICD2	10.643	11.776	14.958	16.993	33.691	16.692	16.155
BID	30.19	0.098745	24.506	33.284	49.54	98.544	98.6
BIK	71.624	0	0	4.6757	0	5.7159	0
BIN1	98.128	51.858	90.68	114.81	0.88909	41.215	152.73
BIN2	65.783	0	237.7	228.11	0	107.26	387.99
BIN3	22.898	19.382	41.726	48.217	60.208	21.668	54.343
BIRC2	32.459	16.149	47.39	82.131	14.569	34.428	78.923
BIRC3	178.97	1.5301	99.971	86.921	2.5374	13.635	25.834
BIRC5	9.5292	164.48	4.1834	11.478	15.983	5.9094	0.024195
BIRC6	19.748	11.705	26.942	29.163	14.732	10.14	33.462
BIRC7	0	0	4.7134	6.2836	0	20.769	0
BIRC8	0	0	0	0	0	0	0
BIVM	1.9897	18.404	5.4823	14.599	8.9519	2.8259	20.753
BIVM-ERCC5	0	1.31	0.63832	0.50497	1.9382	0	0
BLCAP	154.55	115.22	48.385	86.603	23.694	58.516	23.038
BLID	0	0	0	0	0	0	0
BLK	129.01	0	1.3754	2.4997	0	0	0
BLM	8.0281	0	12.301	6.7803	0	4.6518	10.873
BLMH	21.768	52.412	29.146	31.158	30.622	25.924	38.887
BLNK	270.58	0	0.25716	0.14945	0	58.138	0
BLOC1S1	102.19	110.79	191.5	118.5	139.11	277.26	192.15
BLOC1S1-RDH5	0	0	0.63055	1.9263	0	0.33365	5.0394
BLOC1S2	79.785	42.059	36.505	49.345	36.753	47.195	48.037
BLOC1S3	20.907	2.0825	34.225	26.09	19.732	18.911	65.124
BLOC1S4	9.6603	1.5113	15.744	11.859	0	0.38257	0.052258
BLOC1S5	42.081	21.778	31.183	31.245	8.6538	13.486	32.202
BLOC1S5-TXNDC5	0	4.3051	0	0.35216	0	0	0
BLOC1S6	55.247	12.417	37.433	42.513	43.207	44.367	12.826
BLVRA	44.112	45.199	52.924	63.741	19.31	160.11	32.179
BLVRB	0.15337	58.978	24.059	26.295	40.009	525.93	31.121
BLZF1	24.917	8.9799	23.812	33.316	4.8037	18.557	17.805
BMF	0.82285	1.185	1.7331	3.1434	0	4.1162	0
BMI1	0	0	6.3295	4.8438	0	0.25502	10.498
BMP1	4.1808	248.51	2.2716	4.2646	61.843	1.0738	0
BMP10	0	0	0	0	0	0	0
BMP15	0	0	0	0.16689	0	0	0
BMP2	0	0	0.22552	0.67007	0.95724	0	0
BMP2K	20.563	0.73499	1.5643	2.9618	0	22.599	0
BMP3	0.38691	1.44	0.5462	1.3338	0.045456	0.48316	0.18839
BMP4	0.010967	21.99	0.063874	2.7261	19.911	0	0
BMP5	0	0	0.11849	0.0081193	0	0	0
BMP6	0	0	0.77769	0.41863	16.312	0	0
BMP7	6.1885	2.2788	8.5898	10.545	8.6847	2.3384	6.4118
BMP8A	7.5691	49.923	8.0159	10.667	1.96	3.5135	34.888
BMP8B	2.632	0.42375	1.8572	1.952	0.73365	1.2746	1.4136
BMPER	0	0	0.051999	0.64796	1.1782	0.0079268	0.045485
BMPR1A	0.55479	10.418	0	6.8324	0	0	0
BMPR1B	0.14773	0.20625	0.016303	0.94293	0	0	0
BMPR2	8.7471	10.207	4.634	5.7132	49.803	6.7035	1.5768
BMS1	21.478	7.3563	19.513	18.85	22.064	6.6355	13.476
BMS1P1	23.162	12.712	18.433	25.764	12.535	10.895	12.589
BMS1P2	11.021	3.3426	6.3279	10.324	1.5491	4.4077	9.5712
BMS1P4	9.145	11.401	8.3875	20.264	11.147	6.7146	4.7733
BMS1P5	23.692	10.834	18.625	24.487	15.882	10.58	13.437
BMS1P6	10.939	3.3426	6.3664	10.612	1.5473	4.7148	8.3615
BMX	0	0	0.95921	0.080207	0	0	0
BNC1	0	0	0	0.060311	0	0	0
BNC2	0.24708	7.5487	0.17145	1.4826	10.551	1.9441	10.425
BNIP1	4.9084	5.0876	19.195	26.09	13.786	31.243	71.904
BNIP2	127.03	28.926	87.523	106.17	118.27	77.983	79.318
BNIP3	23.662	22.611	32.429	29.959	28.528	58.188	9.2351
BNIP3L	26.836	29.02	47.322	52.007	44.091	212.14	14.749
BNIPL	10.135	4.1274	15.476	17.753	14.191	4.5197	8.1412
BOC	0	47.265	0.067633	0.21304	24.146	0	0
BOD1	21.431	9.3252	2.7398	4.6392	20.564	3.6179	0
BOD1L1	14.911	3.1225	11.766	14.097	8.4037	7.4171	27.871
BOD1L2	0	0	0.8448	0.0040247	0	0	0
BOK	0	43.921	1.375	0.78166	36.072	1.8514	5.3897
BOK-AS1	0	0	0	0.12275	0	0.19109	0
BOLA1	19.934	14	19.556	33.317	48.25	14.882	0
BOLA2	16.633	5.4487	19.752	14.735	2.0237	14.697	11.087
BOLA2B	16.633	5.4487	19.752	14.735	2.0237	14.697	11.087
BOLA3	19.114	46.74	54.137	31.044	17.216	14.542	2.4543
BOLA3-AS1	5.7605	1.2225	8.1692	9.6269	5.1928	5.1629	4.5791
BOLL	0	0	0.064178	0.14056	0	0	0
BOP1	22.197	30.964	4.5521	18.67	31.285	4.7511	0
BORA	9.3366	9.4847	10.187	16.738	18.646	0.99988	1.8572
BPESC1	0.044999	0	0.63704	0.25059	0	0.45694	0
BPGM	30.335	93.834	73.72	49.904	52.987	6.6447	65.749
BPHL	12.132	16.274	11.504	9.2704	20.641	14.241	7.6491
BPI	0	0	0.14661	0.0085814	0	3.4884	0
BPIFA1	0.16193	0	0	0.016602	0	0	0
BPIFA2	0	0	0	0.015494	0	0	0
BPIFA3	0	0	0	0.044017	0	0	0
BPIFA4P	0	0	0.076428	0.040341	0	0	0
BPIFB1	0	0	0.052364	0.16919	0.65727	0	0
BPIFB2	0	0	0.14066	0.0072699	0	0	0
BPIFB3	0	0	0	0	0	0	0
BPIFB4	0	2.8011	0.082486	0.036505	0	0	0
BPIFB6	0	0	0	0	0	0	0
BPIFC	0	0	0.34376	0.28342	0	0	0
BPNT1	23.113	22.767	28.299	27.343	10.976	12.453	18.257
BPTF	34.683	15.242	33.915	27.059	11.245	4.5758	55.569
BPY2	0	0	0.24467	0	0	0	0
BPY2B	0	0	0.24467	0	0	0	0
BPY2C	0	0	0.24467	0	0	0	0
BRAF	14.454	16.801	18.687	11.44	11.286	3.3952	6.2126
BRAP	23.003	3.1212	15.064	20.999	0	16.084	57.043
BRAT1	30.539	1.9499	42.466	53.987	72.422	31.636	66.362
BRCA1	4.7283	0.25375	4.3815	6.0557	1.2491	2.0414	5.3076
BRCA2	2.8285	0.45	1.4427	3.2821	0.17091	2.378	0.091614
BRCC3	35.227	5.8974	21.322	20.271	10.323	17.675	3.2273
BRD1	1.3816	3.8338	15.722	8.1507	6.5208	3.5054	8.224
BRD2	104.8	36.043	102.05	99.642	102.39	53.351	160.53
BRD3	27.006	74.933	40.601	34.817	75.849	25.887	110.86
BRD4	15.285	24.934	11.624	9.8541	14.425	7.5214	11.09
BRD7	47.292	12.597	18.14	17.482	42.415	13.762	38.242
BRD7P3	3.4922	0	4.0791	15.927	0	0.49157	0.047422
BRD8	41.296	32.604	41.543	56.553	62.455	23.812	75.099
BRD9	33.03	3.5463	19.007	16.934	100.77	7.6168	12.102
BRDT	0.99897	2.72	4.2902	2.5862	0.81458	1.4447	1.6342
BRE	46.796	30.616	68.862	50.066	40.124	35.385	86.217
BRE-AS1	14.357	0.115	16.287	12.032	1.4118	48.575	0
BREA2	4.1781	5.0687	6.4765	6.2734	1.4747	3.3801	7.8852
BRF1	5.1969	0.13125	13.853	10.395	20.863	0.61281	40.368
BRF2	31.954	0	21.854	12.566	15.632	3.1594	36.28
BRI3	2.4784	32.973	11.542	10.452	30.598	47.292	0
BRI3BP	11.671	0	0.60378	4.7636	0	2.8315	25.277
BRICD5	2.7641	0	13.861	2.643	0	0.73364	9.3283
BRIP1	12.751	3.5488	15.254	19.495	4.7855	5.4371	15.013
BRIX1	56.178	19.69	33.783	56.727	9.3783	13.288	18.042
BRK1	248.84	334.73	224.33	244.46	218.35	179.14	206.06
BRMS1	30.764	221.43	60.922	102.07	168.56	64.301	59.312
BRMS1L	0	5.4474	4.9727	4.1874	0	0.35718	19.163
BROX	17.172	6.9613	18.054	16.026	20.86	15.815	6.3594
BRPF1	0.34108	0	9.421	5.1161	4.4394	6.8425	15.248
BRPF3	5.0829	8.3839	4.9976	7.0822	0.96636	5.0337	19.628
BRS3	0	0	0	0.11536	0	0	0
BRSK1	0	0	0	0.0096442	0	0.063781	0
BRSK2	0	0.95499	0	0.18747	0	0	1.574
BRWD1	35.435	8.3247	33.449	75.39	47.906	20.01	24.706
BRWD1-AS1	0	0	0	0	0	0	0
BRWD1-IT2	0	0	4.4825	0.27323	0	1.0262	0
BRWD3	3.9612	0.30001	2.6598	3.7716	1.69	1.7213	5.1685
BSCL2	64.755	146.89	38.512	29.857	157.36	58.371	0.13033
BSDC1	35.496	10.271	59.101	56.378	73.017	21.741	34.532
BSG	83.717	277.93	128.88	152.36	309.12	123.16	188.55
BSN	0	5.1286	0.0015151	0.45034	0	0.16427	0
BSN-AS2	9.1579	4.4112	10.846	10.451	5.6736	5.5487	18.05
BSND	0	0	0	0	0	0	0
BSPH1	0	0	0	0	0	0	0
BSPRY	3.6493	0	0.17176	5.8906	0	0.1861	0.671
BST1	7.5744	27.036	0.30339	0.012894	0	33.576	0
BST2	93.765	277.64	207.18	262.24	512.08	466.41	259.85
BSX	0	0	0	0	0	0	0
BTAF1	34.859	4.5337	30.805	42.176	20.462	5.1955	48.509
BTBD1	28.932	16.485	9.955	18.844	11.708	15.273	3.8461
BTBD10	26.63	11.279	15.698	39.563	10.992	13.16	8.243
BTBD11	0.36352	0	5.6832	1.8107	0	0.053292	0
BTBD16	0	0	0.075879	0.028912	0	0	0
BTBD17	0	0	0.32359	0.17577	1.1409	0	0
BTBD18	4.8924	0	3.6188	2.2766	0	0	0
BTBD19	0.03145	16.029	4.5475	0.78544	7.0619	5.3157	0
BTBD2	4.1044	18.148	7.4792	4.9198	4.7138	2.3981	21.042
BTBD3	0.26208	3.8261	3.6745	0.72849	32.834	1.0156	0
BTBD6	5.7846	0	8.7915	7.3927	3.2518	2.3946	0.33355
BTBD7	7.5236	3.0263	5.917	9.4257	5.6672	6.711	0.87518
BTBD8	0	0	2.6919	0.44475	0	0.32658	0
BTBD9	6.4115	5.8623	7.1722	8.6194	0	1.8307	3.8692
BTC	0	0	0	0	0	0	0
BTD	22.417	43.093	5.6966	10.486	0	8.0964	40.938
BTF3	697.55	416.4	709.63	654.96	640.57	469.79	718.43
BTF3L4	18.295	14.33	39.706	29.436	8.1392	44.353	21.108
BTF3P11	0.78916	0.56874	3.4181	2.1874	0	0.63013	5.0824
BTG1	229.83	15.118	216.18	193.7	14.133	62.702	177.71
BTG2	249.3	104.1	350.14	275.27	292.7	378.89	363.33
BTG3	13.585	8.7024	46.838	59.102	10.684	22.111	25.688
BTG4	0	0	0	0	0	0	0
BTK	253.79	0	0.2263	0.037198	0	77.898	0
BTLA	67.719	0	35.239	45.126	0	0.0059755	6.8505
BTN1A1	0	0	0	0.01146	0	0.027926	0
BTN2A1	24.117	6.871	28.755	56.38	63.333	30.115	91.038
BTN2A2	51.626	10.365	20.273	33.35	24.623	27.538	22.462
BTN2A3P	1.4879	2.8224	2.6654	7.8575	0.50637	0.75731	0.79326
BTN3A1	42.205	51.385	131.07	193.73	63.658	30.049	251.08
BTN3A2	61.267	53.288	140.46	162.32	76.608	37.625	243.32
BTN3A3	23.282	48.402	102.91	136.7	23.515	52.686	139.41
BTNL2	1.6066	0	0	0.035513	0	0	0
BTNL3	0	0	0.29085	8.6416	0	0	0
BTNL8	0	0	2.8507	17.539	0	0	0
BTNL9	2.6923	0	2.6961	10.097	86.937	0.004634	0.26066
BTRC	5.5315	1.9525	5.6828	12.224	3.2199	2.0644	2.7281
BUB1	3.5979	0	7.386	9.9299	0	0.02817	0
BUB1B	4.3448	36.268	0.65606	4.2467	0	0.66782	0
BUB3	167.46	72.543	220.69	295.57	95.616	89.751	167.27
BUD13	18.429	8.1903	21.478	29.891	0	1.6851	0.52901
BUD31	69.924	83.938	64.273	132.89	114.45	57.973	126.89
BVES	5.444	2.2925	7.6346	6.6815	4.1073	3.8399	5.1791
BVES-AS1	0	3.7701	0	0.024417	0	0	0
BYSL	0	0	10.627	11.403	46.492	6.1933	4.4221
BZRAP1	0.69158	6.0836	4.716	24.6	0	1.6338	34.563
BZRAP1-AS1	7.8388	0	8.1588	25.235	0	2.3002	3.1077
BZW1	128.82	223.9	155.37	245.69	120.89	120.31	210.53
BZW2	42.931	103.43	30.001	51.328	97.911	30.136	60.3
C10orf10	0	129.15	5.7908	1.4051	9.6196	0.080608	0
C10orf105	0	0	0	0.011678	0	0.12122	0
C10orf107	0	0	0	0	0	0.068293	0
C10orf11	0.22306	4.9924	0	2.6128	23.84	33.221	0
C10orf111	1.193	0.52375	3.1366	3.0845	0	1.0839	2.8135
C10orf113	0	0	0	4.5787	4.3474	0	0
C10orf114	0	0	0	0.035904	0	0	0
C10orf118	17.022	14.568	13.883	15.361	14.314	5.3736	7.2859
C10orf12	17.779	0.79625	4.7352	10.326	4.2653	7.2387	7.8392
C10orf120	0	0	0.26121	0.18316	0	0.90552	0
C10orf128	5.7886	0	12.131	2.4801	53.085	22.183	0
C10orf129	0	0	0.15836	0.048914	0	0	0
C10orf131	0	0	1.0161	3.3461	0	0.084024	0
C10orf137	7.8837	0.28375	27.33	14.366	14.577	4.6666	3.0443
C10orf2	0	0	0.5279	6.879	0	0.18341	0
C10orf25	0	0	3.2058	0.6344	0	3.1574	0.28549
C10orf32	23.754	34.495	52.821	55.482	24.689	41.428	58.048
C10orf32-AS3MT	0.53547	1.1537	1.4567	2.3917	3.3727	1.2672	1.601
C10orf35	0	0	21.836	9.6714	0	8.5598	16.569
C10orf40	0	0	0	0.27038	0	0	0
C10orf53	0	0	0	0	0	0	0
C10orf54	26.717	71.817	114.24	70.221	44.233	188.65	96.92
C10orf55	0.91057	0	0.083152	0.023212	0.44272	1.0583	0.051613
C10orf62	0	0	0	0.51028	0	0	0
C10orf67	0.68949	0	0.85551	0.81856	0.71818	0.47171	2.0001
C10orf68	0.10209	0	0.090001	0.32805	0	0	0
C10orf71	0	0	0.1023	1.9212	0	0	0
C10orf76	17.515	23.477	11.96	24.925	11.387	23.185	3.321
C10orf82	0	0	0	0.1256	0	0	0
C10orf88	3.17	3.1063	11.196	17.809	0	1.1537	6.4823
C10orf90	0	0	0.33455	0.26561	0	1.4845	0
C10orf91	0	0	1.4939	0.094782	0	1.6556	0
C10orf95	0.30596	0	1.0207	0.20078	0	0	0
C10orf99	0	0	0.45599	0.06118	0	0	0
C11orf1	54.947	11.543	4.2939	12.391	0	13.776	18.735
C11orf16	0	0	0	0	0	0	0
C11orf21	10.738	3.385	4.8892	13.626	0.86273	3.4773	22.487
C11orf24	73.866	177.97	16.481	16.182	60.838	26.015	42.616
C11orf30	18.694	0.795	15.765	17.843	8.9918	7.411	1.4132
C11orf31	145.02	140.58	115.77	116.39	154.95	87.845	105.47
C11orf34	0	3.3413	0	0.0078719	0	0	0
C11orf35	0	0	0.04285	0.90283	0	0.62557	0
C11orf40	0	0	0.44242	0.22192	0	0	0
C11orf42	0	0	0	0.012168	0	0	0.2071
C11orf44	0.42788	0.10125	2.8683	1.5513	0	0.78682	1.6807
C11orf45	0	0	0.64475	0.096435	0	2.029	0
C11orf48	43.694	38.717	50.95	61.687	27.527	42.466	62.114
C11orf49	17.904	24.693	18.25	28.327	14.814	14.459	24.463
C11orf52	0	43.085	0	0.15255	0	0.085609	0
C11orf53	4.6903	0	0	0.018276	0	0	0
C11orf54	21.686	3.8488	14.375	22.015	0	9.3725	1.3552
C11orf57	1.0127	10.946	5.3658	6.961	10.188	9.9613	10.691
C11orf58	140.22	56.654	117.86	158.87	112.37	62.206	119.42
C11orf63	18.722	2.795	12.296	15.131	17.619	4.8971	24.11
C11orf65	0.26822	0	0	0.023976	0	2.4467	0
C11orf68	15.535	6.9961	8.2563	12.877	0	3.5357	3.8089
C11orf70	4.2212	4.7263	6.5183	6.4705	2.5837	3.1879	4.5692
C11orf71	27.944	7.8811	13.954	23.213	20.58	13.2	40.514
C11orf73	43.442	123.85	64.447	68.396	58.888	31.22	49.704
C11orf74	0	14.397	4.6091	0.57762	3.6164	22.393	0
C11orf75	37.602	57.273	17.314	29.477	0	112.55	3.3672
C11orf80	30.602	0	6.0534	2.6218	0.49455	0.3167	0.46227
C11orf82	15.307	33.768	0.51851	2.998	0	0.022439	0
C11orf83	11.708	9.3211	20.928	13.834	2.2272	10.138	4.2334
C11orf84	0	20.822	1.224	0.45904	0	0	1.6211
C11orf85	0	0	0	0.20066	0	0	0
C11orf86	0	0	0	0.19592	0	0	0
C11orf87	0	0	0	0.040276	0	0	0
C11orf88	0	0	0.85239	0.17851	0	0.075609	1.461
C11orf91	0	0	0	0.68654	8.031	0.70827	0
C11orf92	15.251	1.5513	3.8317	3.2268	2.0446	1.3738	4.1117
C11orf93	0.99799	27.798	0	0.34689	0	0	0
C11orf94	0	0	0	0.22129	0	0	0
C11orf95	0	22.346	0.52104	0.61792	0.32364	0	0
C11orf96	0	5.0336	0.73621	0.6788	0	0	0
C12orf10	86.337	67.736	37.357	55.516	27.516	30.603	34.992
C12orf23	52.06	54.849	34.963	42.554	16.333	9.3438	25.945
C12orf29	1.4048	15.27	4.5068	12.971	1.9481	1.9659	4.5017
C12orf36	0.30515	0	1.5306	1.3039	0	0.032317	0.14162
C12orf39	0	0	0	0.059739	0	0	0
C12orf4	14.982	3.0349	7.0305	12.576	5.6347	14.318	0
C12orf40	0	0	0.049697	0.58992	0	0	0
C12orf42	3.6974	0	5.486	1.373	0	0.37997	0
C12orf43	37.1	18.772	19.343	21.837	34.092	9.9591	4.044
C12orf44	2.3169	33.206	59.565	61.702	55.418	29.514	130.78
C12orf45	57.242	0	40.609	21.232	16.154	21.671	29.241
C12orf49	1.5212	4.2561	7.4754	9.6814	0	0.76756	0
C12orf5	11.214	0.98499	10.602	14.935	7.9782	15.526	8.8606
C12orf50	0	0	0	0.11976	0	0	0
C12orf52	26.809	10.273	1.9234	26.554	70.13	20.386	2.8942
C12orf54	0	0	0	0	0	0	0
C12orf56	0	0	0	0	0	0	0
C12orf57	107.22	538.39	295.7	273.71	252.5	132.4	202.66
C12orf60	0	0	2.1416	0.72725	0	0.69381	0
C12orf61	0	0	5.483	0.72642	0	0.88292	2.5243
C12orf65	50.427	8.5879	98.996	92.757	51.222	23.511	73.186
C12orf66	4.8802	5.9277	9.2337	11.555	19.257	1.9599	1.871
C12orf68	0	0	0	0.059612	0	0	0
C12orf69	0	0	0.042728	1.2342	0	0.61855	0
C12orf70	0	0	0	0.049282	0	0	0
C12orf71	1.4807	0	0.28963	0.1626	0	0	3.1667
C12orf73	4.0383	3.1525	3.6514	4.5361	0	9.991	1.7888
C12orf74	8.8053	0	0.44145	0.0032423	0	0	0
C12orf75	6.1711	39.734	59.214	67.7	1.4291	0.080364	87.292
C12orf76	1.641	2.7362	15.468	11.728	9.5782	12.259	0.1242
C12orf77	4.0813	4.0777	7.9744	7.4792	0.74637	3.1586	5.1737
C13orf35	0	0	0	0.39508	0	0	0
C13orf45	0	0.33125	0	0.016183	0	0.014268	0
C14orf1	32.85	14.606	65.441	39.417	12.765	8.7739	31.59
C14orf101	1.879	0	6.6433	15.031	0.26455	5.0753	6.1157
C14orf105	4.7168	2.7538	5.7765	5.9757	2.18	3.9186	6.2111
C14orf119	27.187	26.763	40.239	54.278	100.76	29.438	64.354
C14orf132	1.383	12.265	2.7126	2.1685	8.9891	0.42597	1.8323
C14orf142	10.621	31.555	13.374	24.039	1.6891	26.099	58.617
C14orf159	35.342	22.294	40.868	52.126	100.1	23.212	44.217
C14orf166	153.16	164.02	120.24	154.03	206.42	111.4	58.585
C14orf166B	0	0	0.10424	0.1207	0	0.024512	0
C14orf169	0.65192	2.7349	7.698	4.4897	0	4.718	17.324
C14orf177	0.13193	0	0	0.018888	0	0	0
C14orf178	8.8459	0.74874	12.289	12.93	3.5572	5.9286	15.772
C14orf180	0	0	0	0.32953	0	0	0
C14orf182	18.549	0.3675	5.19	7.2708	0	3.527	4.324
C14orf183	0.57236	0	0.62349	0.15264	0	0	0
C14orf2	215.89	239.36	122.68	126.79	107.63	149.34	175.4
C14orf23	26.539	11.354	23.399	36.621	16.836	9.2878	26.889
C14orf28	2.5573	4.5126	5.9983	1.7316	0	1.1876	0.96939
C14orf37	0.055965	41.057	0.65108	0.25115	56.475	0.65644	0
C14orf39	0	0	0.032243	0.083861	0	0.52758	0
C14orf64	2.8464	7.53	18.317	12.344	0	1.3307	30.545
C14orf79	0	0	5.6546	1.5483	0.61455	0.92681	0
C14orf80	2.4001	0	7.5883	9.8976	0	3.8746	0
C14orf93	11.492	16.545	10.906	10.5	0	8.7359	26.946
C15orf26	0	0	0	0.0028418	0	0	0
C15orf27	0	0	0.47358	0.13432	0	0	0
C15orf32	0	0	1.529	0.11928	0	0	0
C15orf37	0.41141	0	3.0563	2.0004	0.10727	0.34901	0.49484
C15orf38	1.2565	23.915	1.3269	1.0171	5.8838	17.485	1.9104
C15orf38-AP3S2	0.078708	4.1413	0.010039	0.17521	0	3.5332	0.30161
C15orf39	6.2371	13.214	9.9388	6.4994	4.6309	17.635	33.137
C15orf40	82.66	26.104	77.933	60.634	16.215	24.118	56.62
C15orf41	11.665	0	4.9256	4.3362	4.91	0.27815	3.5334
C15orf43	0.19482	0	1.2511	0.09015	0	0	0
C15orf48	4.263	0	0.082601	2.0123	0	307.91	8.9372
C15orf52	2.7602	0.24124	4.2901	5.0775	16.076	3.8803	2.0346
C15orf53	0	0	7.2892	1.2164	0	0	0
C15orf54	0.044836	0	0.63583	0.52018	0	0.018537	0.39101
C15orf55	0	0	0	0.23233	0	0	0
C15orf56	0	0	0	0.038247	0	0	0
C15orf57	91.234	76.298	51.368	46.812	39.104	27.173	2.3939
C15orf59	0	0	0.049758	0	0	0	0
C15orf60	0	0	0	0.028561	0	0	0
C15orf61	0	31.791	5.1422	10.427	13.521	9.8952	37.981
C15orf62	0	0	2.7602	2.2909	0	0.16512	0
C16orf11	0	0	0	0	0	0	0
C16orf13	50.237	204	85.278	91.705	139.26	136.26	16.116
C16orf3	0.30449	1.3574	0.37588	0.090849	0	0	0
C16orf45	11.663	53.048	7.2501	43.949	35.233	13.617	0
C16orf46	8.7407	0.1725	1.4086	1.5762	0	0.24586	0
C16orf52	2.5443	0	2.9058	1.1183	0	1.6995	0
C16orf54	87.07	6.0876	189.86	142.31	4.803	24.497	267.7
C16orf55	3.804	0.32124	10.892	10.967	18.124	0.71536	1.5494
C16orf58	19.681	46.02	27.119	27.743	23.849	16.698	7.9897
C16orf59	0.02274	0	0.61562	0.76346	0.64547	0	0
C16orf62	28.072	33.714	11.782	22.418	9.1892	19.309	22.372
C16orf70	0.98489	11.965	9.3382	17.006	1.2045	24.524	0
C16orf71	0	0	0.16201	0.26861	0	0.43974	0
C16orf72	9.0565	0	10.573	11.907	6.1673	8.195	18.306
C16orf74	25.829	0	0.59247	2.8481	2.3036	3.0634	14.453
C16orf78	0	0	0.39739	0	0	0	0
C16orf80	55.782	31.006	72.51	67.879	93.335	17.091	97.086
C16orf82	0	0	1.3812	0.044661	0	0	0
C16orf86	15.286	0	0	2.4898	0	10.284	0
C16orf87	23.548	0.81624	14.608	38.453	0	0.93852	8.3902
C16orf88	6.7779	13.945	4.3224	11.851	64.503	5.9857	28.839
C16orf89	1.8493	4.8964	3.13	2.8264	0	1.9926	5.8239
C16orf90	0	0	0.52687	0.16446	0	0	0
C16orf91	17.236	12.453	54.651	34.472	89.445	21.624	29.146
C16orf92	0	0	0	0	0	0	0
C16orf93	3.1661	0	0	0.60739	0	2.0575	0
C16orf95	0.34934	9.6535	0.092606	2.6134	0	1.39	24.011
C16orf96	0	0	0	0.024024	0	0	0
C16orf97	0	0	0	0.01511	0	0	0
[truncated: 21,687 more rows]

## Sheet: SupplFile 2B
Supplementary File 2B
Variability associated to the reference profiles, based on the standard deviation from TPM expression
Gene	Bcells	CAFs	CD4_Tcells	CD8_Tcells	Endothelial	Macrophages	NKcells
A1BG	30.386	12.668	25.472	31.279	0	17.561	9.7024
A1BG-AS1	1.5388	81.99	42.965	70.794	0	10.802	48.277
A1CF	6.3771	0.10253	1.789	2.5738	0.85634	0.28826	0.81202
A2M	0.69103	334.88	9.1442	71.059	920.39	578.84	36.747
A2M-AS1	0	0.97582	36.022	88.557	28.537	2.4267	1.1998
A2ML1	4.8739	0.30404	3.9267	6.0004	7.7601	1.3236	3.7732
A2MP1	5.1583	0	8.3629	6.6008	0	0	20.782
A4GALT	42.209	69.128	0	0.27596	110.94	0	0
A4GNT	0	0	32.277	0.89606	0	12.178	0
AA06	0	0	1.9672	12.758	0	0	0
AAAS	176.08	0	171.03	175.64	0	65.796	196.43
AACS	22.908	0	39.653	73.142	0	26.701	104.42
AACSP1	2.2165	0.14849	2.6675	2.0562	4.3359	0.43529	3.1073
AADAC	0	380.65	0	2.5712	0	0	0
AADACL2	0.92443	0	0	1.951	0	0	0
AADACL3	0.41873	0	1.8284	0.69086	0	0.39002	0
AADACL4	0	0	1.7275	0.48978	0	0	0
AADAT	0.17906	0.42072	1.6109	1.3721	0	24.583	0.51368
AAED1	0	0.76014	5.3298	64.518	0	0.18553	30.128
AAGAB	84.458	74.818	122.71	142.43	31.66	57.258	119.1
AAK1	3.3411	3.7952	27.178	26.379	21.72	11.849	41.466
AAMDC	76.876	190.9	107.93	68.332	198.83	160.85	9.6936
AAMP	226.41	489.04	221.15	256.64	131.8	149.78	362.91
AANAT	0.83947	0	5.7169	5.1574	0	2.6445	0.19038
AAR2	133.64	211.32	163.05	171.31	50.972	72.799	235.88
AARD	12.037	5.4902	18.132	19.987	6.1528	6.0423	11.698
AARS	141.15	52.584	121.27	137.71	92.982	166.52	94.483
AARS2	35.457	37.472	62.359	77.573	11.458	48.103	105.01
AARSD1	113.67	123.15	192.73	167.18	58.093	144.82	3.0839
AASDH	19.439	9.7364	30.214	80.663	6.3109	30.852	28.48
AASDHPPT	79.052	29.621	86.925	171.42	17.956	42.348	84.683
AASS	28.862	23.164	4.5365	19.39	45	6.4082	76.911
AATF	212.46	50.648	226.86	262.22	136.05	82.988	305.87
AATK	0	0	10.892	3.1215	0	12.717	0
AATK-AS1	0	0	0	0	0	0	0
ABAT	116.05	0	16.532	29.239	3.4073	13.315	87.211
ABCA1	86.28	10.932	20.921	6.5525	3.413	141.14	36.964
ABCA10	2.1471	6.3363	0.17204	1.3952	0	1.9249	0.74718
ABCA11P	21.447	11.096	31.433	57.965	15.019	12.766	20.974
ABCA12	0	0	1.3119	0.61032	0	0.028713	1.0562
ABCA13	0.63696	0.53742	0.7315	0.88268	1.6071	0.46715	1.3036
ABCA17P	0	0	0.8322	2.8231	0	0	0
ABCA2	0.35305	16.328	54.57	66.472	3.9273	11.853	16.958
ABCA3	8.2752	0.86972	5.1491	9.6671	0.10553	1.3693	0
ABCA4	0	2.9133	0.92331	0.58713	0	0	0.70047
ABCA5	47.701	0	40.019	34.513	1.2454	6.8158	43.048
ABCA6	55.866	36.861	0.08875	0.39011	1.7247	25.72	4.5729
ABCA7	52.192	0.11314	44.066	58.227	5.3369	14.721	102.16
ABCA8	0	130.39	1.1872	0.80215	0	0.36758	0
ABCA9	8.0182	17.186	17.607	11.725	13.214	2.6105	9.0092
ABCB1	96.65	0.44548	52.584	129.93	62.376	0	126.45
ABCB10	17.535	33.989	25.047	69.099	7.743	10.397	79.685
ABCB11	0	0	1.1952	0.76834	0	0.31915	0
ABCB4	66.391	0	5.0631	0.67826	38.016	24.509	0
ABCB5	8.3558	2.2458	14.154	71.33	2.6798	16.574	8.7403
ABCB6	8.5138	98.556	50.875	41.457	79.811	42.481	49.61
ABCB7	87.566	32.881	38.982	95.011	12.211	37.343	223.02
ABCB8	16.648	58.056	19.819	41.428	20.671	24.587	3.6622
ABCB9	0	0	23.109	16.287	64.917	1.1615	0
ABCC1	28.255	4.2185	53.783	50.404	49.818	24.379	29.37
ABCC10	106.73	40.267	90.247	94.657	19.045	17.673	76.004
ABCC11	0.32637	0	0	0.57666	0	0.65263	0
ABCC12	0	0	1.3133	2.1391	0	0	0
ABCC13	4.1109	0.86352	8.3018	4.5284	4.8818	2.2561	1.7475
ABCC2	2.5431	0	2.4966	11.725	0	12.326	31.979
ABCC3	0.48766	2.6728	0	1.1719	80.099	28.821	0
ABCC4	26.772	7.9977	31.072	53.552	13.719	3.817	0.61605
ABCC5	67.18	58.745	43.329	63.514	32.722	80.869	51.502
ABCC5-AS1	0	0	7.5759	3.2695	0	0	0
ABCC6	0	0	3.8003	5.7981	1.7941	28.014	16.534
ABCC6P1	0	0	1.2845	9.223	0	0	0
ABCC6P2	0	0	0	11.157	0	0	0
ABCC8	0.76322	0	0	0.64579	0	0.32146	0
ABCC9	78.733	39.541	126.56	143.51	32.324	33.773	64.022
ABCD1	18.872	52.47	25.468	57.781	0	43.251	0
ABCD2	48.81	0	28.148	80.966	0	0	44.147
ABCD3	40.821	95.254	48.712	150.65	70.783	29.62	58.666
ABCD4	102.64	38.973	83.292	97.485	91.73	35.822	67.712
ABCE1	39.711	110	121.07	125.56	26.296	68.721	59.67
ABCF1	35.458	52.45	136.02	123.09	12.097	78.927	78.515
ABCF2	99.095	25.155	165.73	142.86	5.9993	109.67	125.76
ABCF3	54.262	67.302	119.77	130.24	62.701	53.113	142.76
ABCG1	127.79	99.344	138.04	161.25	42.661	113.58	86.718
ABCG2	0.66802	0	2.6717	3.0475	0	1.6757	0
ABCG4	0	0	0	0.8807	0	0	0
ABCG5	0	0	0	1.8643	0	0	0
ABCG8	0	0	2.6989	2.2493	0	0	0
ABHD1	0	0	27.64	8.5516	0	4.6878	44.556
ABHD10	80.478	22.656	120.5	123.43	19.281	62.77	76.652
ABHD11	68.199	23.088	56.082	92.29	34.489	66.465	29.381
ABHD12	0.30351	27.504	112.65	120.96	2.1709	145.69	0
ABHD12B	2.0102	9.1606	1.3448	12.801	0	0.50836	1.2467
ABHD13	111.16	7.5535	80.105	58.008	47.064	41.592	40.162
ABHD14A	108.6	69.026	156.53	235.18	83.863	54.419	260.3
ABHD14A-ACY1	0	14.171	0	8.1957	0	6.9676	0
ABHD14B	236.06	102.94	199.34	234.25	116.16	73.389	88.192
ABHD15	154.06	3.1457	22.844	52.719	13.285	26.592	72.436
ABHD16A	232.2	41.281	156.94	218.83	189.03	139.02	206.89
ABHD16B	60.037	18.562	6.7335	73.268	4.3536	18.998	42.174
ABHD2	25.845	34.646	56.226	60.315	9.3553	37.911	40.666
ABHD3	158.61	22.131	199.08	239.34	0	88.351	87.508
ABHD4	136.93	29.426	64.338	135.37	178.84	44.824	190.51
ABHD5	13.154	9.4113	48.57	37.302	7.9138	45.808	37.578
ABHD6	9.3472	0	119.77	96.182	33.829	30.259	0
ABHD8	26.256	4.9922	78.126	33.915	9.7449	18.892	0
ABI1	116.5	26.373	177.05	227.69	31.285	145.48	120.08
ABI2	29.339	16.957	38.15	55.133	11.958	21.816	74.878
ABI3	91.801	0	68.345	219.48	131.96	113.49	392.95
ABI3BP	8.5856	127.95	2.1899	3.6397	0	0.023189	0.1401
ABL1	56.433	31.083	46.943	44.255	118.82	26.43	56.45
ABL2	5.6818	24.733	24.801	21.231	231.94	21.767	51.819
ABLIM1	117.31	77.164	111.75	96.884	49.91	0.84418	137.93
ABLIM2	0	39.495	8.6379	6.2364	58.26	0	0
ABLIM3	0	0	0.94346	0.53589	33.672	70.975	0
ABO	0	0	0.85805	4.9321	41.349	6.4082	0
ABP1	0	0	2.2631	1.5003	0	28.685	0
ABR	81.427	65.493	108.14	109.12	54.795	53.668	48.019
ABRA	0	3.8537	1.8435	7.6725	0	0.32723	0.12034
ABRACL	135.89	80.542	340.03	307.62	200.11	165.37	133.58
ABT1	152.96	40.796	180.85	197.82	88.394	84.571	228.45
ABTB1	154.68	66.404	139.14	120.3	48.357	47.855	402.64
ABTB2	2.6847	3.6417	10.575	12.768	0.66936	11.464	0
ACAA1	242.92	104.63	251.58	271.66	170.58	188.42	281.35
ACAA2	162.27	80.512	185.8	233.78	103.79	176.92	396.56
ACACA	17.812	5.9853	34.781	30.155	1.8673	5.5954	28.762
ACACB	5.9258	5.7398	24.301	11.914	14.512	6.1684	20.469
ACAD10	60.467	20.515	68.719	74.343	46.412	36.697	12.016
ACAD11	67.808	27.735	109.9	115.85	31.332	14.751	213
ACAD8	42.539	0	92.631	143.09	39.916	46.727	253.57
ACAD9	74.197	39.143	102.35	119.14	26.159	61.715	110.69
ACADL	0	14.712	0	0	0	0	0
ACADM	108.71	152.77	118.3	166.2	49.739	67.062	171.67
ACADS	58.613	91.021	126.59	140.52	9.8222	64.13	0.68431
ACADSB	34.165	9.3047	63.016	43.927	11.474	23.179	29.969
ACADVL	180.78	553.26	249.52	278.11	192.15	137.02	259.67
ACAN	0	0	1.643	6.7866	0	0.015461	0
ACAP1	214.43	0.84146	342.46	345.88	0	70.234	297.55
ACAP2	59.744	9.6701	37.052	73.711	17.396	35.62	57.049
ACAP3	3.5434	15.682	16.127	52.552	25.797	20.106	0
ACAT1	154.38	123.06	159.97	116.26	88.505	89.337	145.72
ACAT2	190.47	114.38	183	206.44	150.22	56.477	450.54
ACBD3	12.61	29.064	21.383	65.938	10.484	61.012	20.789
ACBD4	26.843	14.727	73.038	68.042	7.2338	23.715	116.31
ACBD5	30.834	5.8072	86.927	79.766	6.1108	21.381	19.394
ACBD6	134.28	42.869	140.75	188.41	126.58	57.105	38.931
ACBD7	31.045	9.4984	65.854	43.381	19.354	13.431	21.706
ACCS	90.64	28.877	78.203	68.825	18.71	25.597	7.4662
ACCSL	0	0	0.88207	1.2521	0	0.70787	0
ACD	74.534	14.874	74.845	99.982	79.083	30.111	35.133
ACE	0.29843	17.413	15.915	8.968	71.597	34.607	0
ACE2	0	0	0	4.6727	0	0	0
ACER1	0	0	68.43	39.388	0	0	0
ACER2	35.296	4.4121	50.333	9.6232	38.154	3.5305	0
ACER3	3.5901	2.1567	5.3789	29.873	17.946	44.969	20.558
ACHE	0	0	0	6.3615	60.184	0	0
ACIN1	66.837	27.691	77.35	72.998	32.97	27.934	34.09
ACLY	88.735	56.35	144.23	186.23	57.173	57.602	261.53
ACMSD	0.36573	0	1.7711	0.80943	0	0	1.4548
ACN9	31.015	8.7211	59.495	59.368	25.956	22.899	28.331
ACO1	40.173	35.881	18.384	46.462	67.942	52.255	41.726
ACO2	281.53	38.025	167.77	230.1	7.4443	145.41	107.23
ACOT1	0	8.5167	28.255	27.33	30.139	14.713	33.289
ACOT11	0.41056	0	9.9538	1.7336	83.5	42.175	0.40232
ACOT12	0	0	0	0	9.516	1.5361	0
ACOT13	87.696	7.8924	69.213	65.286	17.495	32.55	16.078
ACOT2	49.313	33.727	68.849	102.85	82.661	45.415	211.74
ACOT4	19.781	0	98.864	66.977	0	22.807	188.92
ACOT6	0	0	0	0	0	0	0
ACOT7	62.462	131.95	316.32	168.98	107.42	42.068	167.34
ACOT8	172.36	72.336	213.09	193.49	191.84	117.74	0
ACOT9	203.78	206.89	200.18	168.52	131.63	136.99	95.013
ACOX1	22.573	12.858	26.072	46.793	26.775	26.419	5.9576
ACOX2	4.3508	16.578	1.4285	0.97619	0	4.6465	0
ACOX3	78.078	14.268	75.062	101.54	21.499	35.976	19.298
ACOXL	2.4815	0	0	1.8091	0	0	0
ACP1	150.95	78.211	247.76	282.78	120.62	91.334	343.88
ACP2	30.772	167.43	107.68	128.26	100.48	184.3	10.85
ACP5	538.37	0	488.09	366.26	41.282	455.55	253.92
ACP6	69.934	8.4207	22.234	143.15	0	0.17352	0
ACPL2	0.63623	54.327	18.963	87.085	2.0352	10.275	167.99
ACPP	1.3401	0.16263	2.4953	1.7993	0	100.95	1.3526
ACPT	0	0	5.7417	1.7725	7.1972	0	0
ACR	0	0	0	1.8665	0	0	0
ACRBP	16.947	0	5.1061	30.37	0	62.055	0
ACRC	55.395	0	22.013	28.288	0	0	0
ACRV1	0	0	0	28.469	0	0	0
ACSBG1	0	0	0.77143	6.8498	0	0	0
ACSBG2	14.494	1.1738	0	1.7159	0	0	0
ACSF2	70.836	0	68.429	86.862	16.749	48.8	0
ACSF3	123.22	20.096	95.034	73.082	114.9	32.206	150.86
ACSL1	173.79	58.412	14.629	100.48	36.855	246.64	49.322
ACSL3	80.423	37.046	57.203	88.371	51.876	104.72	21.314
ACSL4	44.857	41.052	88.815	116.73	2.9335	59.179	31.611
ACSL5	145.62	24.105	155.59	241.07	78.543	79.46	159.79
ACSL6	4.7616	1.9425	26.337	33.109	1.5241	2.377	21.341
ACSM1	3.7489	0	0.1666	0.63225	18.362	1.3054	0
ACSM2A	0	0	0.64229	1.1383	96.192	0.1137	0
ACSM2B	0	0	0	0.34905	19.291	0	0
ACSM3	9.4502	108.17	104.98	53.161	0	1.9924	4.3718
ACSM4	2.1866	0	0	1.8837	0	0	0
ACSM5	5.0695	6.5724	0.81214	2.5074	0	32.145	0
ACSS1	184.33	6.548	65.12	93.379	28.443	20.23	31.388
ACSS2	0	53.359	85.035	6.5062	178.86	54.748	0
ACSS3	0.69654	3.4083	2.1209	7.2427	0	0.36779	1.5011
ACTA1	0.20066	0.36415	1.9401	2.9465	0	32.651	0
ACTA2	88.624	896.46	168.32	269.62	0	14.787	55.811
ACTB	4865.9	5260.8	7870.2	8790.3	2827	7597	7237.9
ACTBL2	0.7679	0	0.19367	0.30273	0	0.23301	1.8751
ACTC1	0.35482	0	2.7212	6.0089	0.19598	0.24497	0
ACTG1	2345.2	2611.6	2335.2	2643	3855.9	1742.3	2865.8
ACTG1P4	0.97759	5.2678	6.4394	22.396	1.7308	1.4399	2.3656
ACTG2	0.24763	0	102.48	1.1968	0	3.5632	4.8897
ACTL10	69.385	0	0.69052	26.563	0	23.524	0
ACTL6A	314.38	56.77	176.98	248.04	58.611	118.37	126.97
ACTL6B	0	0	0.23977	0.058831	0	0	0
ACTL7A	0	0	2.2482	3.09	0	0	0
ACTL7B	0	0	0	0	0	0	0
ACTL8	5.97	0	1.8006	19.199	0	0	0
ACTL9	0	0	7.054	0.097074	0	0	0
ACTN1	15.846	268.66	110.7	61.328	568.14	119.7	110.52
ACTN1-AS1	0	0	0	1.9132	0	0	0
ACTN2	0	0	1.2327	0.52415	0	0	0
ACTN3	0	0	0	0.43598	0	0	0
ACTN4	98.732	41.275	186.82	206.25	123.59	65.416	253.31
ACTR10	116.06	43.041	184.07	181.08	69.033	78.225	121.95
ACTR1A	89.732	75.234	212.1	162.07	114.06	108.51	283.46
ACTR1B	108.02	21.783	299.05	169.03	80.237	37.385	158.32
ACTR2	222.36	34.377	215.61	285.86	63.937	179.9	305.49
ACTR3	380.97	193.77	525.71	580.86	264.72	317	539.29
ACTR3B	33.698	0	1.2032	41.615	0	6.4304	0
ACTR3BP2	0	0	19.996	13.955	0	0	0
ACTR3BP5	0	0	59.235	19.659	0	0	0
ACTR3C	79.106	0	45.022	59.895	0	18.629	0
ACTR5	79.632	20.414	64.233	112.81	60.917	42.902	121.38
ACTR6	99.69	29.808	156.07	199.96	36.171	51.874	96.393
ACTR8	64.548	24.474	65.898	66.807	89.778	26.869	123.94
ACTRT1	0	0	0	4.3389	0	0	0
ACTRT2	0	0	0	0	0	0	0
ACTRT3	0	9.6413	0	77.266	0	0	262.93
ACVR1	0.26669	30.061	60.187	45.866	7.0161	23.515	27.309
ACVR1B	10.893	1.4566	17.079	14.323	2.9096	15.635	30.83
ACVR1C	0	0	8.3599	6.3712	0	0.12479	0
ACVR2A	27.472	27.15	52.155	16.447	7.0349	73.537	23.249
ACVR2B	18.341	0	1.3079	8.5825	13.796	2.033	0
ACVR2B-AS1	9.4511	0.38248	15.758	8.392	0.31659	2.072	3.7352
ACVRL1	3.1453	0.25809	2.5332	2.319	172.96	30.33	2.0457
ACY1	155.81	181.4	55.978	92.077	0	126.12	0
ACY3	60.926	0	0	50.612	0	0	0
ACYP1	67.969	56.778	193.02	138.59	0	39.889	40.352
ACYP2	85.125	18.578	68.135	48.842	22.816	36.127	4.2801
ADA	105.22	132.6	157.72	269.8	203.35	139.14	219.02
ADAD1	0	0	0	1.6158	0	0	0
ADAD2	1.3829	0	52.538	0.29531	0	2.2726	0
ADAL	2.7594	98.615	87.824	64.233	17.634	80.924	31.87
ADAM10	106.07	22.347	172.97	139.16	64.856	93.338	142.96
ADAM11	0	0	1.2877	0.47955	0	4.5013	0
ADAM12	0.54608	150.06	43.118	17.547	0	8.7309	0
ADAM15	42.387	30.644	57.308	66.167	433.09	150.05	15.862
ADAM17	125.9	35.731	84.047	74.656	34.679	55.462	44.828
ADAM18	0	0	2.7481	14.293	0	0	0
ADAM19	112.08	8.5519	122.06	48.873	34.411	68.558	21.196
ADAM1A	70.591	9.5812	59.867	21.826	0	0.98608	15.617
ADAM2	0	0	1.7337	1.0716	0	0	0
ADAM20	0	0	29.562	16.232	0	0.92762	0
ADAM20P1	24.479	0	4.2663	16.565	3.0635	0	0
ADAM21	0	0	0	6.5687	9.2443	0	0
ADAM21P1	0	0	0	2.9523	0	0	0
ADAM22	0.76068	0	16.158	23.323	16.405	1.1054	0
ADAM23	0	0	11.732	1.4358	5.1846	0	0
ADAM28	551.55	0	0.80141	182.3	0	153.73	148.76
ADAM29	0	0	10.182	1.7044	0	0	0
ADAM30	0	0	5.253	8.0957	0	0	0
ADAM32	0	0	0	0.30275	0	4.8413	0
ADAM33	1.8124	108.43	2.8215	2.1744	0	1.5831	2.2433
ADAM3A	0	0	1.6204	2.7355	0	0	0.78309
ADAM5	0	0	1.2977	0.81265	0	0	0
ADAM6	0	0	5.1589	6.6404	0	0	0
ADAM7	0	0	0	7.3638	0	0	0
ADAM8	190.24	2.2733	202.83	225.8	0	47.754	298.65
ADAM9	33.9	103.35	2.1252	13.127	12.939	104.86	79.42
ADAMDEC1	7.1909	0	6.0201	8.581	0	129.17	0
ADAMTS1	0.48258	75.786	0.73101	1.1858	262.48	0	93.72
ADAMTS10	0	9.8617	24.812	5.4448	1.6342	2.135	40.407
ADAMTS12	4.9594	70.84	1.9128	6.0382	0	0.20049	0
ADAMTS13	0	0	1.5598	17.193	0.77187	0.30974	2.7383
ADAMTS14	0	8.3367	0	5.3994	0	0	25.823
ADAMTS15	0	19.266	0	0.34644	0	0.025399	0
ADAMTS16	3.7806	0	0.46082	5.3359	0	0	0
ADAMTS17	14.019	1.0152	8.0445	13.678	1.8285	0.61417	3.709
ADAMTS18	0	0	4.2023	0.45684	125.34	0	0
ADAMTS19	0.69594	0	12.803	0.75887	0	0.2562	0
ADAMTS2	3.5481	219.46	3.2382	12.013	1.6674	23.801	4.5726
ADAMTS20	0	0	0.3609	1.9293	0	0	0
ADAMTS3	0	0	1.5214	34.616	0	0	0
ADAMTS4	9.8384	20.044	15.893	21.437	183.43	4.9303	11.841
ADAMTS5	0.77975	57.874	6.1887	3.3534	13.128	0.048589	0
ADAMTS6	9.0006	14.954	0.89454	10.214	71.534	0	0
ADAMTS7	27.734	4.6324	0.9126	1.5402	13.785	0.42958	0
ADAMTS8	0	0.56567	3.5951	3.39	0	0	0
ADAMTS9	0.035558	25.062	1.9116	0.31501	53.704	2.5274	0
ADAMTS9-AS2	0	0	0	4.8219	45.405	0	0
ADAMTSL1	0	29.847	2.3329	2.7099	165.02	0.17668	0
ADAMTSL2	2.368	4.589	4.3342	4.4048	103.3	3.4499	3.6174
ADAMTSL3	0	6.9684	0.61814	2.9833	0	0	0.70226
ADAMTSL4	0.20318	12.153	13.195	7.4206	3.2201	28.61	0
ADAMTSL5	1.6386	0.18738	22.294	15.067	3.2626	2.1747	1.1594
ADAP1	41.443	0	78.707	70.576	0	40.39	110.33
ADAP2	7.0916	0	3.1915	3.0045	44.721	160.82	1.2831
ADAR	103.18	59.194	148.38	155.56	58.547	48.34	176.82
ADARB1	28.845	13.317	29.5	41.15	30.998	7.4601	70.335
ADARB2	0.40896	0.060105	3.2968	1.3023	0.67236	0.38363	1.6436
ADARB2-AS1	0	0	3.8827	0.2756	0	0.16896	0
ADAT1	52.818	17.05	99.843	99.495	35.015	23.761	24.641
ADAT2	25.964	2.2654	65.937	51.422	7.9119	5.3605	3.245
ADAT3	60.593	22.538	64.155	55.131	0	9.7234	9.8734
ADC	0	69.01	39.078	44.003	0	18.395	0
ADCK1	36.108	0	1.5845	54.371	6.259	24.771	0
ADCK2	43.537	0	52.211	39.521	0	82.801	0
ADCK3	137.84	125.79	105.28	122.23	188.17	55.432	102.94
ADCK4	32.734	145.96	163.24	107.37	91.394	43.797	121.4
ADCK5	2.2224	52.895	101.1	115.33	21.348	40.292	0
ADCY1	0.78687	0.89053	5.57	5.3684	5.7956	0.9961	1.1705
ADCY10	0	0	0.86086	1.1502	0	0	0
ADCY10P1	2.2092	1.1349	13.44	10.184	0	0.085455	51.68
ADCY2	1.6577	1.52	3.1468	2.4516	1.0471	3.3375	2.355
ADCY3	129.84	10.814	9.7075	43.698	17.959	24.041	2.8935
ADCY4	0	0.60811	3.5325	31.945	150.86	10.128	1.4872
ADCY5	0	0	2.9379	2.2167	0	3.2389	0
ADCY6	3.0828	34.457	4.54	5.0718	58.579	1.4086	2.5592
ADCY7	72.272	11.256	78.286	100.38	0.97388	46.785	94.246
ADCY8	0	0	2.8643	1.6338	0	0	0
ADCY9	0	9.5477	1.0632	5.8084	0	12.53	0
ADCYAP1	0	0	0	0.49015	0	0	0
ADCYAP1R1	0	0	23.367	7.6928	0	0.036685	2.4414
ADD1	78.277	39.431	103.09	94.448	94.065	47.933	186.51
ADD2	73.778	0	0.30206	3.7379	20.548	14.948	2.2055
ADD3	146.1	121.03	209.96	146.94	59.791	79.385	228.65
ADGB	2.7394	0	0.48662	0.65717	0	0	0
ADH1A	7.0366	0.23688	1.0205	0.69243	0	0.25178	0
ADH1B	2.5194	128.62	0	0.61974	0	11.335	0
ADH1C	0	0	0.79325	0.50188	0	0	0
ADH4	7.7907	0.8501	18.261	12.663	7.2554	4.076	9.6606
ADH5	250.65	89.325	170.07	187.16	98.221	92.921	157.98
ADH6	0	0	3.1407	6.6077	0	0.5102	0
ADH7	0	0	1.5073	0.58114	0	0.14467	0
ADHFE1	35.044	0	47.541	114.07	52.592	33.453	145.3
ADI1	101.01	136.93	229.37	149.59	41.297	106.81	265.38
ADIG	0	0	0	1.7852	0	0	0
ADIPOQ	5.0813	0.42799	7.331	6.1406	4.3297	2.493	5.3847
ADIPOQ-AS1	3.7567	0	8.4176	3.7908	2.575	2.2167	4.8453
ADIPOR1	313.11	106.72	252.83	237.02	139.78	165.01	46.799
ADIPOR2	47.568	5.5253	43.765	36.095	8.7465	31.911	1.2645
ADIRF	0	201.71	12.247	3.7686	1313.4	4.5442	0
ADK	94.825	33.041	90.138	88.377	26.808	59.323	80.549
ADM	270.71	350.96	166.54	17.68	132.62	884.78	0
ADM2	7.6163	0.56523	13.656	6.3087	9.6838	2.6599	3.6486
ADM5	34.312	0	23.189	4.5278	47.38	0	0
ADNP	78.899	28.333	66.797	85.365	1.3297	32.861	87.773
ADNP2	15.51	0.3182	23.425	45.032	15.332	14.74	15.293
ADO	7.9227	6.7562	32.861	43.141	0	24.41	3.7289
ADORA1	0	3.6556	5.4138	2.4246	0	16.84	0
ADORA2A	117.62	1.6405	186.35	312.97	21.97	19.45	13.523
ADORA2A-AS1	9.4586	0	1.9711	15.904	2.7437	5.5039	0.18319
ADORA2B	0.86324	0	17.242	31.4	0	1.5268	5.4699
ADORA3	0	0	5.3737	7.3924	0	229.81	0
ADPGK	233.65	53.459	168.11	188.63	221.44	143.57	217.37
ADPGK-AS1	57.253	11.337	29.706	21.968	6.8144	7.2917	23.453
ADPRH	136.85	29.02	105.83	90.76	28.412	38.424	0
ADPRHL1	0.087625	8.8739	0	0.77769	0	0	0
ADPRHL2	388.77	73.286	215.78	218.2	103.67	120.51	257.54
ADPRM	207.92	3.6869	139.71	175.23	30.054	37.39	0
ADRA1A	27.051	6.6204	48.138	36.318	23.445	10.763	23.007
ADRA1B	0	0	17.506	0.1443	0	0	0
ADRA1D	0	0	0	0.3571	0	0	0
ADRA2A	0	11.148	0	5.2121	0	0	0
ADRA2B	0	0	21.541	18.149	0	24.521	0
ADRA2C	0	0	0	0.36729	0	0.09828	0
ADRB1	0	0	0	17.058	0	7.248	0
ADRB2	238.09	0	131.87	214.61	0	96.376	325.28
ADRB3	0	0	0.45401	34.29	0	0.32135	0
ADRBK1	96.006	35.986	117.38	89.595	14.629	63.36	122.3
ADRBK2	49.921	1.4526	21.988	18.348	1.0627	16.315	1.5974
ADRM1	266.87	256.43	308.51	278.96	198.15	188.29	324.96
ADSL	122.37	98.505	324.57	287.73	90.415	91.427	215.08
ADSS	186.81	34.386	216.42	249.33	96.943	71.11	146.86
ADSSL1	3.9565	0	0	25.822	23.431	31.127	0
ADTRP	38.28	0	140.86	50.053	0	59.97	0
AEBP1	5.406	936.39	31.82	12.844	52.588	25.38	0
AEBP2	35.101	6.5689	86.184	89.686	39.185	8.4002	14.761
AEN	166.55	15.954	120.13	104.74	141.54	54.324	176.49
AES	73.372	21.426	170.83	87.753	40.106	35.598	254.51
AFAP1	0	62.354	42.383	36.311	31.659	0	1.0974
AFAP1-AS1	1.8737	0.067175	4.9752	1.2215	5.7229	3.2745	0.15446
AFAP1L1	0.71218	0.24748	7.4694	7.092	79.732	2.6741	0.86185
AFAP1L2	0	0	22.596	110.15	0	1.5382	39.852
AFF1	22.741	18.028	89.062	45.152	10.283	22.007	46.861
AFF2	0.22191	0	1.2368	2.624	0	1.8541	0
AFF3	125.4	0.94654	7.6317	15.71	3.5793	10.901	12.247
AFF4	81.396	24.599	35.604	52.323	27.216	18.613	103.41
AFG3L1P	92.58	7.3784	122.49	210.83	254.53	61.817	34.649
AFG3L2	54.62	12.922	84.514	84.428	60.255	37.551	233.86
AFM	0	0	0	1.3747	0	0	0
AFMID	28.393	20.443	42.868	70.111	18.772	44.145	23.608
AFP	0	0	0	1.5565	0	0	0
AFTPH	158.86	1.5142	120.64	142.1	61.663	42.14	82.483
AGA	110.11	31.727	156.52	116.35	20.901	52.049	0
AGAP1	0.96521	1.1391	16.65	15.174	0	1.0913	1.4482
AGAP11	0.75116	9.4148	6.8165	17.634	39.233	0.90777	5.3328
AGAP2	15.456	9.0581	52.695	39.582	0	4.3406	59.153
AGAP3	0.28954	122.94	28.559	35.936	0.22311	35.161	58.483
AGAP4	0	0	6.5988	37.326	0	6.075	11.556
AGAP5	5.5175	14.849	10.826	61.551	20.956	9.6307	64.175
AGAP6	59.448	0	90.878	52.336	49.985	15.52	11.838
AGAP7	5.9623	11.68	29.134	39.391	0	13.733	2.0456
AGAP8	8.9526	4.9885	58.816	57.181	20.068	3.4778	63.484
AGAP9	1.6952	10.943	27.325	47.018	0	20.527	7.9847
AGBL1	0.25526	0	1.1785	1.4932	0	0.14356	0
AGBL2	8.3728	6.9051	6.4713	34.318	0	0	1.2519
AGBL3	0.94482	2.9521	5.9077	17.553	0	3.6369	7.2186
AGBL4	0.98165	0	6.1152	0.22502	0	0	0
AGBL5	126.11	0.43487	71.905	62.379	76.602	47.48	162.79
AGER	13.617	0	76.104	32.776	7.2668	37.581	17.437
AGFG1	9.9872	1.5228	26.701	33.49	1.4695	26.744	4.2054
AGFG2	19.208	0	40.104	56.961	1.9026	0.12685	46.358
AGGF1	79.072	19.975	82.146	78.563	21.069	41.334	60.15
AGK	83.338	11.094	114.24	162.95	55.307	44.583	300.13
AGL	45.921	9.8336	51.7	48.944	6.4226	19.527	91.573
AGMAT	29.692	13.99	51.733	65.128	12.813	11.865	27.159
AGMO	13.401	7.8694	7.8621	8.0447	17.555	2.3467	7.3301
AGO1	44.155	21.372	7.3464	39.943	29.088	21.478	19.923
AGO2	1.1023	11.159	61.965	69.746	29.723	42.073	22.957
AGO3	54.283	71.203	67.658	113.25	4.729	48.773	79.475
AGO4	7.5555	3.6672	14.714	35.008	20.395	26.721	92.933
AGPAT1	80.466	133.85	106.07	119.99	64.871	48.664	145.43
AGPAT2	51.654	40.415	131.03	136.73	92.763	109.07	276.01
AGPAT3	22.097	9.2841	31.033	18.726	3.7145	17.707	11.701
AGPAT4	0	8.0353	10.804	8.2501	5.7618	8.7345	62.362
AGPAT4-IT1	0	0	30.331	17.793	0	18.63	125.06
AGPAT5	52.995	2.5809	19.93	62.807	47.997	27.362	0
AGPAT6	40.012	40.686	72.355	68.767	44.359	77.299	73.858
AGPAT9	0	0	20.074	32.056	15.152	73.073	0
AGPHD1	0	38.567	17.375	27.301	36.399	0	0
AGPS	16.656	5.1244	28.091	46.189	4.0184	15.626	33.894
AGR2	0	0	0	0.66341	0	0	0
AGR3	0	0	0	0	0	0	0
AGRN	0.86988	8.4219	8.0982	20.675	40.282	4.1356	6.3493
AGRP	0	0	0	15.723	0	43.043	0
AGSK1	2.2923	15.256	0.3515	11.738	2.4121	0.10933	21.987
AGT	0	0	0	8.4396	0	0.41301	0
AGTPBP1	22.913	6.6576	65.392	96.361	35.988	40.594	128.69
AGTR1	0	0.68942	0	1.0793	0	0	0
AGTR2	0	0	0	3.1656	0	0	0
AGTRAP	379.28	466.47	244.18	312.04	61.721	434.33	350.3
AGXT	0	0	1.4262	2.5071	0	0	0
AGXT2	0	0	1.9088	1.6211	0	0	0
AGXT2L1	0.80138	0	0	0	0	0.050801	0
AGXT2L2	218.52	29.262	177.63	212.21	89.902	59.928	191.16
AHCTF1	21.566	26.37	17.095	52.21	21.65	8.9462	42.281
AHCTF1P1	0	0	1.9675	3.5387	0	0.59189	0
AHCY	163.57	124.16	104.43	168.05	129.39	94.414	315.97
AHCYL1	75.594	55.391	54.251	66.188	52.965	44.127	67.732
AHCYL2	1.4855	0.29532	21.31	26.195	9.8011	1.9808	9.9096
AHDC1	0.39649	4.5001	5.7705	8.441	15.421	2.4217	2.1935
AHI1	30.471	17.65	56.323	93.059	59.378	16.467	50.141
AHNAK	114.66	191.14	242.31	200.49	84.591	95.145	365.92
AHNAK2	4.9623	21.761	1.5624	13.125	6.5635	0.6009	0
AHR	11.095	68.09	45.545	50.432	36.98	62.516	5.2851
AHRR	0.81031	28.728	19.889	29.051	0	0.5167	0.71656
AHSA1	256.5	72.969	327.22	327.74	45.63	161.89	254.94
AHSA2	63.849	49.227	72.065	50.772	54.934	15.789	70.047
AHSG	0	0	2.4741	10.063	0	0	0
AHSP	0	0	0	0	0	0	0
AICDA	81.458	0.81619	27.642	18.505	5.518	9.252	14.258
AIDA	124.4	20.799	36.786	69.204	17.09	34.017	105.83
AIF1	71.807	0	66.338	110.65	0	1052.7	0
AIF1L	0	40.559	12.398	26.699	103.44	0.69489	0
AIFM1	226.15	104.07	130.78	115.96	45.903	60.51	18.411
AIFM2	10.218	59.026	60.858	59.409	6.4677	2.4017	46.304
AIFM3	0	0	5.4683	0.7787	0	14.264	0
AIG1	49.463	43.363	25.558	49.426	62.869	76.322	197.64
AIM1	68.897	2.1083	100.96	74.07	7.7571	28.644	97.063
AIM1L	17.381	0	30.811	16.035	0	0	0
AIM2	347.58	1.2303	122.59	127.01	6.4677	92.372	0.91422
AIMP1	97.594	52.106	44.147	90.466	32.074	82.238	76.212
AIMP2	136.24	392.69	125.36	143.91	0	238.83	216.73
AIP	325.01	104.44	530.63	402.78	241.74	210.27	437.57
AIPL1	15.15	3.8024	13.243	17.196	6.5947	5.2644	23.829
AIRE	3.193	0	4.253	2.6711	0	3.3185	1.2625
AIRN	1.7297	0	1.6857	8.5913	0	0.97956	0
AJAP1	0.42797	0	2.5755	1.3179	0	1.5599	0.43286
AJUBA	0.49953	0.37476	2.5584	12.379	3.6089	1.0839	2.9808
AK1	27.992	94.08	68.536	73.16	90.477	11.405	55.755
AK2	138.19	62.384	165.57	169.15	57.034	70.844	153.99
AK3	55.432	96.3	96.28	114.43	37.671	62.164	28.524
AK4	1.4834	12.524	86.883	34.175	41.997	38.148	25.031
AK5	0.76197	17.031	0.71404	1.0111	0	0	22.803
AK7	8.2125	0	11.854	22.356	15.971	0	0
AK8	0	4.807	1.2877	2.038	0	0	0
AKAP1	38.173	0	32.24	56.137	5.0267	15.305	3.2151
AKAP10	104.61	15.184	111.56	95.79	32.915	90.357	24.993
AKAP11	33.51	8.25	29.747	48.862	10.062	13.223	31.616
AKAP12	24.049	60.123	0.80312	8.4984	10.004	11.356	0.43269
AKAP13	80.48	30.82	115.2	129.07	75.199	52.824	146.03
AKAP14	0	0	0	0	0	0	0
AKAP17A	75.499	0	24.486	41.769	42.157	15.316	5.6578
AKAP2	121.83	12.591	54.559	49.396	69.55	24.289	65.294
AKAP3	0.34796	0	0	10.319	38.781	19.651	0
AKAP4	0	0	0	0.3683	0	0	0
AKAP5	7.8158	4.8733	25.813	77.566	17.441	4.8181	29.155
AKAP6	3.9817	0.19445	0.030238	3.2407	0	0	0
AKAP7	1.2928	0	58.694	66.85	0	5.5233	46.232
AKAP8	86.652	49.092	77.059	116.2	54.348	34.369	78.747
AKAP8L	21.623	0	105.32	112.79	40.14	45.374	52.339
AKAP9	45.344	16.162	51.222	56.611	59.997	53.608	68.432
AKD1	119.8	1.2198	64.113	63.193	14.068	48.883	48.112
AKIP1	104.68	51.894	140.13	131.82	107.2	73.208	50.114
AKIRIN1	179.54	83.692	225.06	254.15	45.442	70.476	135.3
AKIRIN2	136.54	76.857	100.73	138.49	24.367	96.774	81.364
AKNA	61.645	19.242	98.62	109.98	7.9399	27.004	174.1
AKNAD1	0	0	0.18684	0.80753	0	2.2858	0
AKR1A1	227.96	161.91	257.92	210.24	61.33	302.44	340.74
AKR1B1	304.83	99.971	269.29	355.56	100.77	399.94	216.14
AKR1B10	7.1898	2.8215	13.189	11.464	9.8933	4.9986	22.582
AKR1B15	3.1663	0	3.8843	2.8509	0	0.71497	1.8418
AKR1C1	0	77.689	2.5505	0.72089	7.1971	0.80948	0
AKR1C2	0.66003	19.322	6.4505	1.2897	0	0.36521	0
AKR1C3	0	256.12	93.876	25.266	288.6	0	523.04
AKR1C4	0	0	1.2214	0.7277	0	0	2.3386
AKR1C6P	1.1265	0	1.515	1.6581	0	0.80549	0.79387
AKR1CL1	0	0	1.5301	4.2442	0	41.385	0
AKR1D1	10.235	7.4558	9.5374	8.4515	4.0987	3.1505	6.7561
AKR1E2	0	0	23.302	5.4849	11.795	6.2291	0
AKR7A2	171.84	113.25	78.756	151.32	74.554	67.952	329.07
AKR7A2P1	0	0	0	47.382	5.1831	0.62723	0
AKR7A3	0	0	0	11.298	0	1.1186	0
AKR7L	2.6264	0.24749	5.2492	24.412	0	1.0181	2.0785
AKT1	81.278	29.948	85.316	99.195	19.476	34.266	79.11
AKT1S1	14.181	7.4666	15.671	8.6717	0	27.47	0
AKT2	21.934	21.463	41.115	39.038	7.4717	10.193	8.4259
AKT3	33.441	22.547	34.086	66.637	12.772	5.8514	110.44
AKTIP	102.41	36.066	243.73	185.06	62.532	21.771	394.12
ALAD	47.781	33.481	140.02	102.37	88.233	202.17	0.46774
ALAS1	123.53	49.087	97.658	143.13	129.76	128.24	207.38
ALAS2	0	0	0.55039	1.344	0	3.1936	2.193
ALB	0	0	0	0.64835	0	0	0
ALCAM	140.72	0	80.144	74.031	0	113.21	4.7741
ALDH16A1	105.82	24.06	73.686	68.505	103.49	45.326	52.527
ALDH18A1	123.05	78.672	82.876	147.48	16.213	24.141	180.91
ALDH1A1	0	31.699	41.842	15.963	112.88	209.68	53.529
ALDH1A2	0.59305	0	3.3855	13.208	50.331	21.3	8.1008
ALDH1A3	0	170.22	0.32542	12.186	12.559	0.47938	0
ALDH1B1	29.416	99.202	24.232	37.086	72.694	31.995	128.32
ALDH1L1	0	0	0.37756	1.2888	0	0	0
ALDH1L1-AS1	0	0	0	2.121	0	0	0
ALDH1L1-AS2	0	0	0	3.0315	0	0	0
ALDH1L2	32.518	36.107	5.7454	10.227	0.94521	1.0397	4.7273
ALDH2	68.412	378.78	4.4808	40.463	126.91	296.74	3.5618
ALDH3A1	0	0	0	0.51608	0	0	0
ALDH3A2	63.662	52.439	90.407	121.82	39.949	51.963	199.96
ALDH3B1	4.6609	18.252	9.8071	18.602	8.523	106.2	16.722
ALDH3B2	0	0	11.885	2.4438	0	1.6216	0
ALDH4A1	43.102	0	3.3413	21.548	0	14.716	0
ALDH5A1	60.447	6.869	26.459	47.127	5.3773	14.26	103.45
ALDH6A1	69.431	41.063	109.48	150.67	62.854	33.626	0
ALDH7A1	5.4396	62.348	4.6644	13.011	5.1978	17.434	1.2597
ALDH8A1	4.7358	0.52571	48.791	6.652	4.3073	2.7071	6.2858
ALDH9A1	175.76	70.121	237.92	289.34	250.14	156.59	296.58
ALDOA	583.38	712.9	843.98	1005.9	412.16	1282	577.41
ALDOB	0	0	0	4.81	0	0	0
ALDOC	143.58	25.89	378.25	272.69	0	119.41	74.136
ALG1	11.808	49.555	89.678	80.87	46.54	26.01	158.27
ALG10	9.2309	0	24.294	61.72	8.325	18.933	0
ALG10B	25.963	3.6845	4.0009	32.03	0.76093	6.9264	8.6182
ALG11	92.097	13.05	119.04	123.35	48.898	69.683	0
ALG12	139.77	33.642	113.44	161.68	47.293	195.08	154.82
ALG13	61.783	111.64	62.032	91.07	75.326	40.833	33.542
ALG14	178.85	19.792	50.617	79.997	0	16.005	0
ALG1L	12.366	1.9081	17.779	11.693	19.058	10.317	8.6135
ALG1L2	0.63242	0	8.6237	4.7513	4.197	1.7092	9.5284
ALG1L9P	69.242	6.5758	21.825	21.516	26.489	34.891	16.283
ALG2	110.78	64.6	80.379	148.48	41.808	59.267	140.26
ALG3	130.94	242.62	192.88	216.12	99.44	76.105	288.28
ALG5	198.85	90.659	178.3	193.04	121.07	232.9	146.92
ALG6	39.982	12.223	66.007	96.465	34.409	30.105	21.969
ALG8	48.83	35.757	210.5	198.75	116.06	70.154	128.11
ALG9	99.15	9.4236	49.487	38.574	1.8451	26.106	6.792
ALK	18.86	0	0.6128	1.4089	6.2868	0.092408	0
ALKBH1	106.5	61.867	67.313	92.848	15.844	38.883	0
ALKBH2	107.07	0	124.04	68.067	57.449	16.095	0
ALKBH3	87.054	77.317	98.297	179.2	11.147	123.33	236.77
ALKBH4	87.489	27.746	57.108	66.588	12.09	15.316	199.55
ALKBH5	114.15	46.374	119.74	118.02	79.524	34.889	106.05
ALKBH6	120.52	50.706	155.58	163.3	122.59	45.968	192.78
ALKBH7	121.27	35.851	193.64	119.5	70.655	91.65	114.91
ALKBH8	3.3846	0	72.321	49.34	54.313	13.401	126.08
ALLC	0	0	0	0.21741	0	0	0
ALMS1	6.2966	2.2852	26.38	21.544	1.3922	2.1739	8.5739
ALMS1P	0	0	19.15	4.3939	0	5.9942	0
ALOX12	18.016	0	7.7904	4.9231	0	1.275	7.0372
ALOX12B	0.46987	0	1.3756	1.7702	0	0	0
ALOX12P2	1.3655	0	39.925	15.968	0	0.57486	13.139
ALOX15	75.68	0.39599	2.955	2.4436	0	1.0961	6.1706
ALOX15B	0	10.147	0.26838	7.5269	0	35.688	0
ALOX15P1	1.7373	0	0	1.3511	0	0	0
ALOX5	619.37	0.32526	19.735	0.9748	0	305.13	0
ALOX5AP	583.87	0	581.74	867.5	0	535.71	591.06
ALOXE3	0	0	0	0.22291	0	0	0
ALPI	0	0	0	0	0	0	0
ALPK1	74.769	11.013	18.043	19.906	11.125	24.189	7.6835
ALPK2	37.566	6.0473	3.2424	6.1015	0	11.829	0
ALPK3	0	0	15.79	3.6003	9.558	2.4818	0
ALPL	24.764	268.62	5.6184	0.14501	621.83	0	0
ALPP	2.1936	0	1.9342	2.0128	0	0.52717	0.95287
ALPPL2	0	0	0	0	0	0	0
ALS2	34.494	0.1096	46.37	55.036	21.088	14.707	50.579
ALS2CL	1.6085	3.0458	38.188	9.9782	50.896	58.676	5.1283
ALS2CR11	0	0	0	14.446	0	3.0037	0
ALS2CR12	0	0	23.537	18.269	0	1.3693	4.3915
ALS2CR8	59.984	12.365	46.267	45.051	0.54874	9.544	10.142
ALX1	0	0	11.714	37.222	0	8.5528	0
ALX3	42.143	0.61871	7.5379	14.116	0	3.768	41.351
ALX4	0	0	3.3519	27.088	0	0	0
ALYREF	0.2743	0	18.841	13.55	0	18.516	12.919
AMACR	110.34	53.056	57.152	50.505	42.647	11.513	139.45
AMBN	0	0	0	0	0	0	0
AMBP	0	0	1.276	3.3792	0	0.72058	0
AMBRA1	67.292	16.878	52.041	64.559	41.567	17.344	93.085
AMD1	152.26	49.267	132.94	194.27	505.37	122.42	230.55
AMDHD1	35.152	0	2.4321	102.39	0	10.327	0
AMDHD2	51.114	39.766	139.94	138.55	121.87	119.11	65.856
AMELX	0	0	0	0.10782	0	0	0
AMELY	0	0	0	0	0	0	0
AMER1	0.55971	0.091923	7.9449	20.036	7.4226	2.9799	0.046698
AMER2	0	0	0.24367	2.2846	0	0	0
AMER3	1.4375	0.22981	3.1003	8.1651	1.2357	1.1884	2.0812
AMFR	132.71	4.368	54.207	66.595	61.257	45.834	54.691
AMH	0	0	0	0.10485	5.0894	0	0
AMHR2	0	0	0	0.11894	0	0	0
AMICA1	2.1629	0	202.13	385.38	0	329.09	30.441
AMIGO1	0	12.484	20.202	18.034	0	0	2.5686
AMIGO2	25.841	30.579	64.443	156.79	0	1.7062	0
AMIGO3	18.802	0	49.013	28.948	0	18.712	142.84
AMMECR1	73.577	1.8224	41.277	55.767	0	14.853	0
AMMECR1L	77.395	22.242	34.463	41.381	14.138	11.677	4.3552
AMN	6.336	0	0	11.942	0	0	0
AMN1	194.43	16.455	87.598	89.853	58.894	18.887	130.02
AMOT	0.54099	6.4996	5.7482	5.1585	3.648	1.4158	48.461
AMOTL1	1.3664	37.373	0.4668	4.5216	30.024	4.4329	0
AMOTL2	1.7557	88.244	14.131	6.6351	80.851	0.4644	0
AMPD1	31.431	0	0.23988	1.8846	0	0	0
AMPD2	109.88	123.74	153.4	119.94	221.12	181.02	149.36
AMPD3	79.986	0	65.032	48.839	0	38.445	0
AMPH	0	7.5941	0.6952	5.6785	0	0	35.528
AMT	68.257	0	84.812	55.137	5.3433	13.237	104.34
AMTN	0	0	0	0	0	0	0
AMY1A	0	0	0.0007785	1.279	0	0.0022085	0
AMY1B	0	0	0.69584	4.4554	0	13.671	0
AMY1C	0	0	1.1026	0	0	2.2449	0
AMY2A	0.57148	0	0	4.045	0	0	0
AMY2B	80.767	6.7724	52.996	56.887	4.6858	21.053	54.126
AMZ1	23.188	0.17324	18.837	19.676	0.84725	3.016	0.51054
AMZ2	348.46	151.18	197.39	311.18	31.164	106.62	8.3104
AMZ2P1	61.837	14.548	35.967	43.171	18.251	33.801	7.2581
ANAPC1	25.067	18.228	24.778	57.955	5.3482	5.7678	23.812
ANAPC10	40.937	10.653	66.286	104.04	31.881	32.956	44.795
ANAPC11	471.05	131.3	187.91	211.58	175.77	412.1	237.27
ANAPC13	202.92	82.821	215.62	248.93	110.75	387.06	26.862
ANAPC15	126.67	46.676	166.51	186.24	51.66	185.31	237.46
ANAPC16	120.43	42.877	183.63	142.55	53.687	46.3	210.14
ANAPC1P1	12.266	7.3471	8.7288	104.15	2.183	0.1524	2.434
ANAPC2	12.09	23.311	21.736	30.546	3.4583	22.517	7.9907
ANAPC4	102.86	15.726	65.289	136.25	33.711	40.184	58.393
ANAPC5	255.73	85.07	305.8	275.05	134.83	141.79	216
ANAPC7	123.56	28.738	149.67	167.53	81.264	38.359	231.66
ANG	153.52	62.686	25.384	3.6708	0	38.26	0
ANGEL1	46.05	6.0638	69.936	60.387	125.46	35.74	101.32
ANGEL2	44.194	20.429	41.994	58.792	20.254	13.235	94.836
ANGPT1	0	3.387	0	14.545	0	0	0
ANGPT2	14.377	14.214	22.728	28.11	14.696	12.129	22.439
ANGPT4	0	0	1.2421	0.58223	0	0	0
ANGPTL1	45.134	16.367	0	1.7038	0	0.32577	0
ANGPTL2	0	196.34	5.6264	8.1837	12.085	5.2847	0
ANGPTL3	0	0	0	0.50423	0	0	0
ANGPTL4	0	36.249	32.477	11.589	4.3205	383.06	0
ANGPTL5	0	3.822	1.019	1.0932	0	0	0
ANGPTL6	59.917	0	30.849	2.4909	11.331	1.8662	1.8894
ANGPTL7	0	0	33.534	11.503	0	7.6151	0
ANHX	0	0	5.4151	9.4122	0	0	0
ANK1	45.097	11.473	38.88	55.426	0	0.032026	0
ANK2	10.343	57.119	1.2684	13.041	0	1.9669	0
ANK3	27.471	0	48.248	45.083	0	7.5498	5.4759
ANKAR	10.631	7.0353	12.112	17.401	2.2464	8.3545	1.4405
ANKDD1A	10.676	0.25102	35.196	44.866	51.507	12.495	40.326
ANKDD1B	0	0	2.8033	3.3238	0	0	0
ANKEF1	0.98963	0	39.164	18.687	32.013	6.2984	1.38
ANKFN1	0	10.921	0.47333	1.9504	0	0	0
ANKFY1	35.59	37.697	35.931	57.272	15.134	18.741	74.819
ANKH	37.203	9.5189	48.497	32.602	14.854	12.585	68.789
ANKHD1	171.39	25.913	197.08	150.89	27.044	56.646	131.38
ANKHD1-EIF4EBP3	1.1006	28.799	9.0654	42.713	0	14.311	46.713
ANKIB1	70.112	34.997	58	67.064	16.975	3.4198	146.22
ANKK1	0.21045	0	72.141	35.361	0	0.99747	1.8193
ANKLE1	12.222	1.9365	23.964	15.85	8.3249	27.605	14.384
ANKLE2	37.055	3.7935	36.706	56.197	10.238	6.5241	51.733
ANKMY1	78.544	17.507	68.638	106.42	52.32	14.859	15.296
ANKMY2	134.4	49.331	83.438	106.18	0	29.85	92.522
ANKRA2	174.58	8.5136	142.49	141.26	67.557	59.194	16.084
ANKRD1	3.4609	0	1.3434	2.6413	0	2.0066	0
ANKRD10	283.32	138.54	234.11	316.32	167.12	129.71	520.09
ANKRD11	72.576	10.978	43.842	48.67	24.964	22.641	39.317
ANKRD12	110.81	6.6805	78.692	85.671	22.195	25.887	56.763
ANKRD13A	107.13	41.287	87.407	68.048	15.368	37.913	9.7692
ANKRD13B	0	36.967	0.38865	2.6553	8.7544	0.86358	0
ANKRD13C	36.822	24.183	70.614	74.138	44.884	18.196	117.74
ANKRD13D	71.719	53.146	51.007	100.54	2.9126	36.271	118.01
ANKRD16	26.327	6.1135	16.321	23.185	7.0931	21.491	17.31
ANKRD17	42	6.9491	62.244	54.028	35.425	12.417	39.313
ANKRD18A	1.7712	0	18.029	31.077	0	0.090609	0.25864
ANKRD18B	1.1336	0	1.7674	4.2955	0	0.40969	4.4103
ANKRD18DP	30.519	0	0.64772	2.3566	0	0	0
ANKRD19P	1.594	11.737	18.415	29.552	18.72	64.01	11.747
ANKRD2	0	0	0	0.15228	0	0	0
ANKRD20A1	1.8668	0	11.358	5.4099	0	0.27545	11.94
ANKRD20A11P	0	2.1248	8.4939	14.113	0	0.035337	39.144
ANKRD20A12P	30.967	0	20.248	33.076	56.857	3.5529	16.577
ANKRD20A19P	2.2015	0.42149	5.478	4.0703	3.1995	1.6683	3.4129
ANKRD20A2	3.8311	0	2.266	14.985	0	0.5503	42.366
ANKRD20A3	2.0583	3.1452	8.5734	7.5193	0	2.2295	4.0794
ANKRD20A4	7.5265	0	7.6612	26.073	3.1929	5.2161	0
ANKRD20A5P	2.312	0	4.1808	19.366	3.1162	0.64935	10.451
ANKRD20A8P	1.0388	0	2.5665	9.0885	0	0.45207	7.4847
ANKRD20A9P	15.308	7.3139	47.044	30.233	17.502	7.4505	15.98
ANKRD22	1.0729	0	11.779	1.4142	0.1809	80.196	0.66741
ANKRD23	58.772	0	46.217	32.379	1.3056	0.5759	26.155
ANKRD24	0	0	0	2.0166	3.0061	0	0
ANKRD26	45.315	15.162	22.76	26.131	6.7172	22.987	1.2267
ANKRD26P1	0	1.6724	3.9314	0.40643	0	0	0
ANKRD26P3	0	0	0.35188	1.1817	0	2.139	0
ANKRD27	53.588	14.877	96.324	104.81	53.988	65.935	102.24
ANKRD28	21.699	8.4346	39.114	33.276	35.194	15.7	34.408
ANKRD29	0	1.4071	0	1.6733	40.475	21.201	0
ANKRD30A	0	0	0.075513	1.0395	0	0	0
ANKRD30B	0	0	20.085	8.9204	0	9.5352	0
ANKRD30BL	11.606	2.2274	12.37	25.996	4.5405	3.9051	7.3106
ANKRD30BP2	10.838	0.97558	12.627	11.718	4.9482	4.6668	4.6941
ANKRD30BP3	0	0	0	3.5899	0	0	0
ANKRD31	0	0.12728	10.634	4.5123	0	0	0
ANKRD32	46.794	6.3119	76.114	89.948	31.749	8.1212	41.795
ANKRD33	0	0	0	2.5852	0	4.7053	0
ANKRD33B	15.041	0.61517	1.5419	8.6574	0.15075	0.17988	28.14
ANKRD34A	11.726	6.2504	3.8947	18.335	0	0.027609	120.31
ANKRD34B	0	0	0.28883	0	0	10.511	0
ANKRD34C	0	0	0.27404	1.97	0	0.051901	0
ANKRD35	0	7.2221	15.128	39.108	0	0	0.74718
ANKRD36	160.81	77.896	179.96	174.94	64.179	21.864	133.99
ANKRD36B	66.727	12.227	124.74	107.75	101.57	21.506	113.9
ANKRD36BP1	196.33	74.986	277.43	205.35	150.07	82.972	355.84
ANKRD36BP2	157.76	0.55862	5.4779	8.3563	0	1.4159	7.1773
ANKRD37	51.62	9.6485	202.04	101.48	109.1	79.685	20.983
ANKRD39	162.33	40.348	308.32	189.14	162.92	100.81	519.89
ANKRD40	61.082	4.2613	51.362	54.972	50.345	33.078	100.22
ANKRD42	0.56388	1.637	67.302	28.832	31.993	48.2	5.4458
ANKRD44	397.32	39.411	330.5	341.5	0	125.43	427.62
ANKRD45	7.3157	3.0449	10.219	8.4459	7.7581	3.9645	7.7321
ANKRD46	107.54	0	30.529	74.322	19.608	12.342	0.26043
ANKRD49	85.135	66.92	213.56	187.16	65.744	51.063	109.53
ANKRD50	8.7805	8.8827	6.3217	33.099	31.122	6.859	0
ANKRD52	36.437	11.035	22.969	50.318	20.118	15.842	56.018
ANKRD53	0	0	24.948	0.76886	5.156	0	0
ANKRD54	149.71	2.0436	87.005	110.43	69.296	25.647	40.086
ANKRD55	0	0	29.762	6.7659	0	0	0
ANKRD6	68.195	6.4596	9.1697	10.225	0	2.7378	0
ANKRD61	0	0	0	21.245	0	0	0
ANKRD62P1-PARP4P3	1.6675	0	1.4826	4.0213	0	2.0197	2.2308
ANKRD63	0	0	0	0.7152	0	0	0
ANKRD65	15.313	36.108	13.812	15.986	0.4613	21.068	14.858
ANKRD66	0	0	0	3.3548	0	0	0
ANKRD7	0	0	0	41.661	0	0	0
ANKRD9	0	0	0	19.918	0	52.468	0
ANKS1A	4.4333	12.13	22.302	21.202	17.18	13.825	85.313
ANKS1B	3.194	0	15.668	41.822	0	2.2357	0
ANKS3	49.911	2.4418	15.4	79.263	63.892	60.423	20.987
ANKS4B	12.702	5.9964	23.819	17.549	15.061	8.0336	12.214
ANKS6	20.237	3.4224	3.566	7.2619	0	4.8503	0
ANKUB1	0	0	2.8213	1.5849	0	0	0
ANKZF1	140.53	154.97	168.06	230.02	207.71	44.91	250.36
ANLN	21.987	12.721	19.429	17.855	0	12.3	0
ANO1	0	18.841	0	2.544	4.5048	0	0
ANO10	26.226	54.065	67.46	58.397	17.297	48.493	29.384
ANO2	1.0833	0	0.30596	2.6632	73.58	0.10601	0
ANO3	0	0	0	4.9264	0	0	0
ANO4	0	0	0.33865	0.69859	0	0	0
ANO5	0.85211	0	0.58251	3.5472	0	20.975	5.4187
ANO6	18.086	29.915	56.736	45.422	34.974	49.229	61.129
ANO7	0.42796	13.574	6.8607	0.66492	0	0.58506	0.44644
ANO8	0	0	2.366	1.3395	1.589	0.4561	0
ANO9	31.053	0	120.24	124.91	243.38	0	1.893
ANP32A	49.765	11.99	48.67	41.024	9.2544	26.622	52.945
ANP32A-IT1	10.816	6.1976	26.812	33.663	3.977	11.327	12.951
ANP32AP1	0	0	0	1.4355	0	0.73435	0
ANP32B	243.47	161.8	289	242.32	100.97	149.04	126.01
ANP32C	0	0	1.1273	0.33572	0	0	0
ANP32D	0	0	0	2.6937	0	0	0
ANP32E	281.28	72.999	183.66	270.64	20.338	103.28	235.66
ANPEP	0	127.27	23.614	19.162	53.015	236.9	0
ANTXR1	4.5217	139.28	1.7885	6.6123	0	9.0029	2.6655
ANTXR2	88.337	30.639	129.2	39.63	74.245	42.031	24.801
ANXA1	4.4845	625.73	1094.3	762.08	765.59	1009.3	742.67
ANXA10	0	0	0	2.3085	0	0	0.89623
ANXA11	201.13	59.759	220.38	197.42	102.46	108.89	224.56
ANXA13	0	0	2.3643	0.54774	0	0	0
ANXA2	427.69	1565.3	667.45	675.95	1635.8	1046.7	579.66
ANXA2P1	0	0	1.5708	4.466	4.0088	1.2874	11.213
ANXA2P2	6.5532	3.4048	7.8345	7.8789	6.5583	7.6205	161.84
ANXA2P3	0.74418	2.7964	1.4057	2.9771	3.0273	1.7036	0.33048
ANXA2R	131.41	0	184.5	155.46	69.055	29.911	262.45
ANXA3	0	0	0.10187	9.1116	0	6.6589	0
ANXA4	78.188	117.32	73.381	128.37	121.3	131.65	163.81
ANXA5	338.32	529.59	502.2	693.93	417.45	469.23	284.92
ANXA6	371.69	158.35	486.81	366.52	96.642	114.67	450.93
ANXA7	397.75	112.97	400.93	362.46	262.11	238.66	203.68
ANXA8	0	0	1.4373	4.0587	0	0	0
ANXA8L1	0	0	0	0.11764	0	0	0
ANXA8L2	0	0	0	0.035112	0	0	0
ANXA9	0	0	1.8652	38.211	0	0	0
AOAH	0.062226	0	135.44	348.45	2.6473	242.99	483.95
AOAH-IT1	0	0	0	24.998	0	7.9884	0
AOC2	0	0	0.42973	3.459	0	0	0.41669
AOC3	9.052	0	3.2265	0.63175	131.57	2.3754	0
AOC4	66.07	0.62419	9.0363	5.7723	164.38	2.025	2.4804
AOX1	0	91.226	0.63731	0.20569	0	0.022086	0
AOX2P	0.17045	0	2.5702	0.82983	0	0.8131	1.3561
AP1AR	72.837	1.1314	119.13	147.25	30.507	8.7154	18.504
AP1B1	131.44	21.271	74.684	108.06	76.365	134.24	65.301
AP1B1P1	0	0	0	4.7513	0	0	0
AP1G1	99.681	38.75	61.545	70.421	14.591	32.3	48.598
AP1G2	238.97	71.279	181.32	227.52	90.242	48.451	208.01
AP1M1	289.01	119.48	277.61	243.54	96.944	88.447	328.95
AP1M2	0	0	0.25273	1.6518	0	0	0
AP1S1	41.368	35.615	38.317	53.959	36.425	26.115	58.422
AP1S2	182.33	47.528	270.46	155.12	81.967	326.97	139.08
AP1S3	84.506	10.681	55.634	58.624	19.676	22.491	20.343
AP2A1	21.848	69.756	50.249	37.603	34.998	25.421	72.375
AP2A2	1.2597	28.641	19.384	32.979	67.089	44.69	2.8782
AP2B1	148.9	41.199	117.99	158.19	95.617	42.885	131.73
AP2M1	192.7	210.95	275.11	346.61	208.1	189.11	351.54
AP2S1	227.64	177.16	226.34	214.04	138.54	398.79	256.92
AP3B1	102.84	26.78	146.44	145.48	72.97	58.98	162.72
AP3B2	0	0	0	0	0	0	0
AP3D1	87.796	74.71	68.006	87.638	4.7497	43.547	38.635
AP3M1	64.618	36.217	107.09	126.2	39.041	45.767	61.239
AP3M2	4.867	0	54.286	94.15	23.599	11.191	111.07
AP3S1	200.01	90.915	230.64	303.34	101.73	147.48	304.72
AP3S2	37.593	39.94	58.879	51.889	1.4083	21.648	4.6353
AP4B1	123.11	96.953	126.88	160.22	88.738	64.953	309.41
AP4B1-AS1	37.399	12.687	29.811	51.382	17.94	12.599	22.488
AP4E1	26.026	5.5696	27.683	22.922	5.1502	7.5507	33.614
AP4M1	19.368	16.365	0.74191	47.199	43.444	33.503	18.912
AP4S1	20.564	9.9624	64.489	52.864	18.222	15.778	22.923
AP5B1	21.783	1.3647	16.252	95.896	6.4971	18.914	69.881
AP5M1	150.19	24.699	112.35	156.47	27.951	33.265	75.594
AP5S1	81.568	32.498	82.114	75.955	0.0060303	61.065	6.2724
AP5Z1	27.97	59.089	72.481	76.455	35.477	35.165	16.107
APAF1	16.534	9.335	27.986	61.567	35.125	34.751	55.735
APBA1	0.79497	0	5.6392	11.583	41.658	15.949	0
APBA2	0.51814	10.416	127.25	57.167	0	0	81.875
APBA3	88.403	29.653	195.29	152.15	138.57	12.194	199.85
APBB1	110.49	60.001	203.69	222.53	42.763	37.574	31.936
APBB1IP	150.28	0	150.37	149.28	0	85.35	204.57
APBB2	7.6101	12.454	13.251	10.397	25.375	3.179	2.144
APBB3	29.837	0	55.239	70.754	47.505	114.57	6.5631
APC	37.585	1.3082	32.631	37.173	17.032	22.902	51.996
APC2	0	0.053033	0.54427	1.1889	0	0.4707	0.24966
APCDD1	0	164.88	0.32386	0.86115	36.121	4.1599	0
APCDD1L	0	0	0	28.991	0	0	0
APCDD1L-AS1	0	24.633	0	5.2922	0	1.388	0
APCS	0	0	0	1.5818	0	0	0
APEH	106.45	62.413	174.25	221.87	127.27	88.602	92.299
APEX1	352.03	130.32	275.01	272.74	208.17	146.02	114.42
APEX2	102.19	59.448	85.968	134.84	44.793	71.819	164.78
APH1A	158.35	79.129	184.43	117.54	130.42	190.65	212.62
APH1B	111.25	5.4943	50.615	33.35	0	48.189	0.9214
API5	170.02	23.011	154.65	210.65	11.548	91.551	57.39
APIP	89.866	22.122	162.99	142.88	38.087	88.99	85.636
APITD1	23.607	23.162	11.257	62.871	69.364	31.088	51.279
APITD1-CORT	1.0807	10.497	0	12.238	14.328	0	0
APLF	32.624	0	19.762	9.2093	5.1498	0.8197	0.28018
APLN	0	0	0	0	0	0	0
APLNR	0	0	1.1102	1.1511	1123.8	4.1686	53.875
APLP1	0	0	0	23.447	0	5.1535	0
APLP2	122.2	87.026	110.94	153.26	188.12	312.4	171.93
APMAP	191.76	100.68	277.28	450.38	182.45	317.97	723.98
APOA1	0	0	37.347	27.905	0	0	0
APOA1BP	180.08	182.15	165.38	174.91	100.54	354.36	229.59
APOA2	0	0	0	0	0	0.38098	0
APOA4	0	0	0	0.28762	0	0	0
APOA5	0	0	0	6.641	0	0	0
APOB	0.66771	0	0.32578	0.18953	0	0	0
APOBEC1	0	0	0	0	0	0	0
APOBEC2	17.041	0	43.125	20.468	0	5.1661	39.407
APOBEC3A	24.587	2.9429	50.811	42.521	5.3741	1580.2	25.272
APOBEC3A_B	0	0	3.0536	6.2719	0	1992	0
APOBEC3B	32.725	0	2.5129	52.581	0	146.31	1.8301
APOBEC3C	436.54	227.39	549.66	746.27	5.7922	180.49	643.04
APOBEC3D	134.61	8.9951	138.91	167.92	27.496	15.856	137.54
APOBEC3F	67.461	8.0782	105.47	102.58	8.2979	34.794	137.05
APOBEC3G	248.97	2.6057	377.38	736.45	98.697	132.09	844.56
APOBEC3H	0.56385	0	156.88	191.45	0	20.604	251.23
APOBEC4	0	0	9.8833	1.2325	0	0	0
APOBR	4.0564	0	14.326	21.095	1.598	10.366	91.596
APOC1	0	6.47	66.409	45.7	0	2202.4	1.3417
APOC1P1	20.27	1.0288	30.853	20.202	16.861	39.923	37.313
APOC2	0	0	0.71856	22.87	0	610.13	7.3768
APOC3	0	0	0	3.2792	0	0	0
APOC4	0.87119	0	10.184	11.424	0.84122	4.6305	17.826
APOC4-APOC2	0	0	0	0.059069	0	2.8036	26.007
APOD	131.39	890.39	149.24	89.824	1.3839	299.74	266.87
APOE	122.68	0	241.61	140.95	0.65728	1918.7	0
APOF	8.2129	0.46401	7.0198	15.184	12.579	1.9862	6.5408
APOH	0	0	0	1.4291	0	0	0
APOL1	132.82	226.56	104.86	104.93	132.01	83.113	144.6
APOL2	95.575	85.007	174	187.66	80.555	235.3	286.92
APOL3	209.65	28.915	233.16	239.07	181.37	132.17	175.4
APOL4	25.977	122.91	47.882	37.203	197.55	51.326	19.783
APOL5	0	0	4.8865	32.582	0	0	0
APOL6	24.996	23.825	76.334	76.365	6.0521	48.822	79.788
APOLD1	8.9395	0.32173	33.018	22.235	83.95	3.228	5.7063
APOM	37.657	17.709	17.648	23.399	0	26.804	0
APOO	147.65	32.814	111.81	68.108	78.883	35.016	32.811
APOOL	25.096	10.61	28.099	54.591	15.041	18.284	49.176
APOPT1	79.409	93.4	57.595	86.468	46.85	101.59	151.68
APP	95.985	173.82	135.92	19.585	329.24	95.301	1.11
APPBP2	57.624	4.7861	66.614	76.838	19.19	17.25	49.911
APPL1	64.01	25.889	35.145	41.317	14.503	43.956	117.83
APPL2	14.709	54.62	34.065	60.727	45.98	48.018	64.026
APRT	541.39	354.32	479.59	440.25	273.48	301.78	624.14
APTX	18.56	29.006	87.281	101.07	169.11	96.296	152.09
AQP1	0	143.85	34.365	2.2436	1839.4	0	0
AQP10	0	0	0	0.56431	0	3.283	0
AQP11	1.5126	7.9268	21.569	35.711	0	11.877	0
AQP12A	0	0	0	3.6365	0	3.4829	0
AQP12B	0	0	0	1.9841	0	0	0
AQP2	0	0	14.856	1.6132	0	0	0
AQP3	283.74	64.424	467.32	151.07	0	0.26511	168.42
AQP4	0	0	3.3599	8.8826	0	0	0
AQP4-AS1	9.1024	0.43337	13.266	12.628	4.5536	2.485	16.095
AQP5	0	0	0	0.30105	0	0	0
AQP6	13.186	5.0823	20.2	25.292	11.867	5.1021	8.3408
AQP7	1.4019	0	0.93812	1.9685	11.783	0	0
AQP7P1	31.095	0	7.383	9.2182	2.198	3.5479	0
AQP7P3	66.419	0	41.536	7.9395	0	11.64	0
AQP8	0	0	0	2.3752	0	8.7082	0
AQP9	0	0	2.6541	3.9331	0	235.71	0.41849
AQPEP	1.4106	16.832	0	0.14365	0	0.068468	0
AQR	57.538	22.475	82.016	81.966	15.855	39.81	141.36
AR	0	9.822	0	16.166	0	0	0
ARAF	129.28	23.724	134.6	138.11	102.52	70.028	145.04
ARAP1	52.724	81.87	94.871	97.849	60.532	108.3	82.774
ARAP2	34.42	0	99.685	149.24	2.1292	22.679	141.06
ARAP3	0.14732	0	5.3661	3.7972	16.32	2.3647	0.36282
ARC	0	0	0	1.6416	0	1.1595	0
ARCN1	177.44	95.039	153.72	178.77	108.88	62.071	154.85
AREG	90.771	0	166.83	173.71	0	912.91	617.91
ARF1	520.29	898.09	570.71	601.12	337.42	384.77	864.64
ARF3	37.97	19.767	82.557	50.908	35.706	54.344	106.08
ARF4	208.05	348.81	253.9	298.35	167.27	286.77	189.88
ARF5	253.71	188.65	327.6	309.04	492.96	182.8	459.8
ARF6	273.94	12.917	164.43	273	51.221	66.265	262.34
ARFGAP1	89.937	55.388	106.28	109.63	88.619	29.244	123.55
ARFGAP2	144.9	93.656	165.02	161.5	78.932	89.062	288.55
ARFGAP3	128.25	64.319	121.69	210.59	80.185	87.258	166.52
ARFGEF1	15.235	24.28	42.608	63.009	5.5394	17.306	35.228
ARFGEF2	12.93	4.9108	25.05	37.162	4.6318	20.212	31.123
ARFIP1	153.76	24.374	139.4	141.05	40.537	48.422	217.97
ARFIP2	67.666	55.186	89.474	79.913	52.766	60.003	12.571
ARFRP1	141.03	67.088	128.99	173.09	95.213	56.693	125.9
ARG1	9.811	0	14.838	5.395	0	0.46601	0
ARG2	5.0037	1.2339	106.29	70.852	12.97	26.968	3.1485
ARGFX	17.656	5.3794	37.497	25.522	15.935	10.25	15.209
ARGFXP2	3.5934	0	23.182	22.024	0	2.0424	31.303
ARGLU1	302.03	62.234	270.75	340.22	203.81	92.542	438.66
ARHGAP1	108.12	102.21	114.03	101.6	39.464	115.19	106.04
ARHGAP10	40.491	12.697	9.756	43.623	2.183	21.363	0
ARHGAP11A	26.923	24.966	48.07	48.68	3.1519	43.029	39.298
ARHGAP11B	24.757	55.158	80.268	88.404	0	19.815	0
ARHGAP12	83.274	33.504	56.07	61.429	21.105	24.912	40.639
ARHGAP15	628.16	0	414.57	471.36	0	128.35	315.14
ARHGAP17	199.29	66.519	94.153	44.055	32.517	58.693	118.69
ARHGAP18	53.551	7.2098	92.846	109.73	24.443	136.22	99.306
ARHGAP19	33.47	0	28.246	46.392	12.73	15.304	0.11495
ARHGAP19-SLIT1	56.48	0	95.544	69.994	24.654	13.5	44.668
ARHGAP20	2.8765	5.1549	18.029	7.3124	6.688	3.6922	0
ARHGAP21	15.18	9.1059	16.972	16.225	4.8115	18.126	45.641
ARHGAP22	0	0	2.4429	33.975	4.3205	60.322	2.2272
ARHGAP23	0.20954	17.898	5.0723	4.1368	11.547	0	0.66994
ARHGAP24	203.74	10.331	4.2133	2.2982	57.552	37.039	6.6764
ARHGAP25	349.24	0	261.73	286.36	4.2724	121.63	453.46
ARHGAP26	6.735	23.737	25.723	29.346	13.999	27.17	49.506
ARHGAP26-AS1	0	0	3.3951	1.8773	0	1.3174	0
ARHGAP27	179.86	0	124.9	156.14	44.777	117.4	161.76
ARHGAP28	0	32.769	0.18918	3.7208	5.7073	0	0
ARHGAP29	0	8.8812	5.2059	0.49389	33.214	1.7655	0
ARHGAP30	188.32	16.235	215.64	278.2	0	113.65	402.85
ARHGAP31	7.5418	34.84	22.997	29.171	89.382	42.961	1.0651
ARHGAP32	17.137	0	0	0.94473	0	1.0691	3.0071
ARHGAP33	12.119	41.872	36.112	33.316	0.18392	2.4458	3.7753
ARHGAP35	16.838	2.8597	29.197	31.149	9.9191	10.76	4.7012
ARHGAP36	0	0	1.0626	1.8127	0	0	0
ARHGAP39	3.3864	0	0.28805	1.8272	0	0	0
ARHGAP4	97.438	0	207.41	232.72	29.372	110.38	233.22
ARHGAP40	0	0	0.88945	0.17722	0	0	0
ARHGAP42	4.2878	11.705	8.0282	16.402	7.6013	0.90996	57.026
ARHGAP44	10.567	0	0.17438	3.0568	0	1.8955	0
ARHGAP5	41.732	22.397	42.432	26.446	14.105	16.857	5.4809
ARHGAP5-AS1	0	0	0.5792	33.257	0	0	0
ARHGAP6	0	0	0	0.10896	61.651	3.4046	3.242
ARHGAP8	2.308	0	2.689	22.806	6.2687	7.0481	8.5168
ARHGAP9	185.2	0	295.94	355.82	5.9911	124.94	637.7
ARHGDIA	93.919	67.61	130.76	64.88	117.17	116.24	109.03
ARHGDIB	1309.9	271.07	1473.3	1320.7	251.86	827.85	1301.7
ARHGDIG	0	0	0	0	0	0	0
ARHGEF1	279.18	0.66822	225.02	261.04	130.66	67.797	283.59
ARHGEF10	10.593	12.757	0.58283	8.44	43.117	5.7211	5.7993
ARHGEF10L	0.96915	33.444	0.54378	3.6885	0	67.856	0.91781
ARHGEF11	0	3.1068	5.5267	4.1138	17.687	12.158	0
ARHGEF12	13.891	3.7268	8.3231	14.508	48.167	5.8794	9.4332
ARHGEF15	0.541	0	0	3.4637	65.335	0	1.2483
ARHGEF16	0	0	0	1.0231	0	19.51	0
ARHGEF17	0	13.374	0.71098	5.0101	7.8452	8.5662	0
ARHGEF18	126.89	27.839	51.229	40.198	87.347	24.932	56.469
ARHGEF19	49.199	76.256	64.658	60.257	83.464	25.998	2.3925
ARHGEF2	95.163	0.99129	60.033	79.829	74.258	35.159	99.877
ARHGEF25	0	0	0	12.107	0	0	0
ARHGEF26	21.425	7.6725	14.566	18.009	0	1.8219	3.0961
ARHGEF26-AS1	93.496	51.872	289.4	178.57	50.789	43.477	103.07
ARHGEF28	0	0	11.183	0.92915	41.429	0	18.034
ARHGEF3	184.8	0	159.87	267.15	109.57	63.312	402.62
ARHGEF3-AS1	0	0	5.5773	1.1436	0	5.5707	0
ARHGEF33	0.82547	0	0	1.5778	0	0	0
ARHGEF35	1.7527	1.3082	12.759	22.569	12.48	0.040861	0
ARHGEF37	0	0	0	0.31203	0	0	0
ARHGEF38	0	0	0.45343	4.0113	0	0	0
ARHGEF38-IT1	0	0	0	0.82701	0	0	0
ARHGEF39	34.634	2.9514	33.409	23.168	16.33	7.6368	107.63
ARHGEF4	0	0	10.689	22.695	0	0	0
ARHGEF40	0	41.487	11.517	13.366	0	27.28	28.589
ARHGEF5	0	4.7588	13.636	11.712	3.2926	0	0
ARHGEF6	119.52	19.409	142.95	151.18	59.607	46.604	93.333
ARHGEF7	132.4	7.9529	72.172	85.778	10.084	29.307	31.383
ARHGEF9	28.533	19.813	42.078	44.727	0	13.809	19.012
ARID1A	44.75	41.747	41.514	42.096	18.361	46.373	57.06
ARID1B	59.317	4.5357	34.293	36.838	13.302	8.8655	53.676
ARID2	56.639	14.715	61.544	54.58	24.504	15.853	125.13
ARID3A	9.9274	13.42	2.7533	9.4618	0	22.384	0
ARID3B	113.56	0.61871	88.275	82.893	93.453	15.054	28.433
ARID3C	0	0	0	0	0	0	0
ARID4A	134.5	8.8869	86.021	92.4	53.925	31.508	85.978
ARID4B	108.99	14.679	139.08	146.14	57.204	45.923	67.45
ARID5A	92.423	70.331	346.1	384.36	95.508	127.79	440.72
ARID5B	96.576	120.2	198.19	139.99	77.717	42.797	64.49
ARIH1	46.027	4.8433	47.241	81.444	7.0503	28.39	103.98
ARIH2	114.21	75.928	136.04	154.31	63.283	100.89	297.37
ARIH2OS	69.044	5.4088	61.086	68.701	24.948	60.597	113.22
ARL1	114.59	95.229	66.369	115.93	42.858	77.558	213.38
ARL10	7.3875	0	47.757	3.6086	0	0.58752	225.3
ARL11	128.22	0.85016	19.172	8.9188	10.55	34.355	14.878
ARL13A	0	0	0.75904	1.4152	0	0	0
ARL13B	0.55409	14.564	8.3573	31.008	17.691	27.415	0
ARL14	0	0	0	0.20238	0	0	0
ARL14EP	132.65	75.204	180.65	127.47	0	41.488	113.01
ARL14EPL	0	0	4.6693	16.39	0	0	0
ARL15	53.801	0.84853	77.248	68.131	138.12	38.733	10.832
ARL16	230.92	40.337	234.67	145.44	164.71	72.174	116.08
ARL17A	174.71	3.2076	143.83	133.29	75.037	31.172	104.5
ARL17B	57.851	13.838	70.641	98.429	62.767	69.423	18.614
ARL2	141.96	249.71	119.4	202.98	211.56	134.09	89.434
ARL2-SNX15	0	0	0	1.3243	0	0	0
ARL2BP	154.83	196.88	311.71	242.63	93.32	136.26	231.64
ARL3	31.119	16.803	35.398	46.605	10.339	12.82	54.606
ARL4A	86.213	5.5755	85.956	65.848	163.39	101.93	40.405
ARL4C	98.512	38.999	184.16	168.49	40.391	69.422	437.88
ARL4D	3.6689	142.83	82	27.687	0	4.6799	97.28
ARL5A	79.358	59.359	71.041	114.94	28.7	92.254	6.6962
ARL5B	91.972	22.851	32.932	76.049	2.082	95.14	0.89086
ARL5C	0	0	7.2364	8.0513	0	0	4.643
ARL6	15.025	1.6546	62.047	63.341	0	0	3.8725
ARL6IP1	252.37	123.86	395.68	580.05	175.68	282	351.86
ARL6IP4	241.19	248.04	295.86	265.2	204.05	248.25	234.84
ARL6IP5	350.5	213.22	451.04	465.89	74.516	199.81	429.53
ARL6IP6	102.41	3.6169	88.267	130.79	60.837	32.082	82.626
ARL8A	13.401	0.62226	33.5	18.071	0	19.825	25.93
ARL8B	160.81	38.842	204.32	226.01	137.5	198.21	135.38
ARL9	0	0	2.8369	0.99586	60.667	0	0
ARMC1	160.09	19.693	74.761	123.16	36.08	43.9	66.358
ARMC10	98.678	35.414	54.205	115.21	28.088	32.009	20.377
ARMC12	0	73.033	23.144	21.159	0	0	0
ARMC2	12.72	0	18.468	49.044	0	7.9213	3.9154
ARMC3	1.4823	0	0.40716	2.4235	0	0	0
ARMC4	0	0	0.42661	1.704	1.0191	0	1.2968
ARMC5	10.168	0	37.625	30.549	20.198	13.023	59.142
ARMC6	72.672	159.01	153.59	131.42	49.67	41.776	209.62
ARMC7	144.71	0	120.83	106.16	3.3466	54.771	24.114
ARMC8	127.45	25.375	125.26	165.69	23.182	52.931	104.43
ARMC9	17.689	17.735	42.876	41.474	5.4579	23.017	7.9787
ARMCX1	0.66544	34.12	5.4026	37.022	26.327	36.639	85.508
ARMCX2	141.25	141.34	1.7688	97.219	136.22	23.555	109.58
ARMCX3	95.137	62.575	86.625	149.47	36.957	73.868	168.88
ARMCX4	0.83375	71.419	7.2454	25.023	3.5774	5.2088	0.15985
ARMCX5	30.845	0.84499	150.3	83.231	0	11.185	15.794
ARMCX5-GPRASP2	0	5.2258	3.1288	2.7176	0	1.8507	5.62
ARMCX6	247.89	138.01	183.95	198.58	65.869	114.53	61.536
ARMS2	0	0	0	0	0	0	0
ARNT	27.747	32.074	74.304	142.92	10.954	46.784	70.529
ARNT2	10.437	0	1.9131	6.3929	0	0.2286	0
ARNTL	8.3866	22.5	163.64	124.14	0	19.509	115
ARNTL2	4.2394	9.9727	16.142	14.226	31.399	14.337	5.5501
ARPC1A	305.5	355.44	162.22	169.3	453.41	247.15	127.25
ARPC1B	586	325.22	757.68	641.72	553.4	566.8	965.78
ARPC2	1039.5	352.31	842.81	1015.4	254.85	724.65	986.5
ARPC3	1030.8	312.1	729.37	727.11	390.39	759.85	592.08
ARPC4	396.8	155.9	441.37	431.81	154.29	286.47	511.44
ARPC4-TTLL3	33.06	25.597	33.536	28.344	32.142	11.933	9.9862
ARPC5	337.53	65.383	334.02	417.31	245.48	340.54	590.37
ARPC5L	232.52	200	233.82	400.19	235.34	67.558	621.47
ARPP19	126.02	22.541	129.05	164.67	40.9	72.733	169.78
ARPP21	0.26668	0	2.3932	12.47	0	0	0
ARR3	0	0	0	1.3033	0	0	0
ARRB1	9.6436	17.47	19.795	18.478	47.673	23.068	25.28
ARRB2	33.287	0.44195	48.345	27.327	0	80.484	47.994
ARRDC1	131.74	97.047	265.94	204.73	88.248	161.44	262.6
ARRDC2	294.27	35.856	144.44	143.25	80.849	128.09	172.23
ARRDC3	223.13	89.759	147.5	326.75	59.47	138.51	195.59
ARRDC3-AS1	30.942	12.823	85.193	54.086	8.7946	15.508	36.815
ARRDC4	0	15.277	0	7.7949	0	8.8316	3.1308
ARRDC5	21.395	0	53.879	92.314	0	68.524	64.782
ARSA	56.734	31.508	111.36	79.281	13.352	52.015	96.056
ARSB	9.4832	15.961	9.611	32.745	12.148	28.276	27.098
ARSD	56.238	10.379	16.581	31.509	69.848	16.289	39.624
ARSE	0	0	3.111	2.9309	0	0	0
ARSF	2.0075	0.38537	2.3906	2.0371	0	0.51565	0.31432
ARSG	101.93	0	33.892	99.506	31.509	32.807	31.178
ARSH	0	0	0	3.9963	0	0	0
ARSI	0	87.165	9.7234	1.0927	2.9338	0	0
ARSJ	0	3.4966	0	6.6472	0	3.6774	0
ARSK	8.2561	28.567	14.186	54.405	2.7057	7.7209	14.077
ART1	0	0	0	4.0957	0	0	0
ART3	8.4801	0	3.0362	4.7832	0	0	0
ART4	0	0	13.714	8.6162	22.303	0	0
ART5	0	0	10.648	1.0888	0	0	0
ARTN	0	0	0	1.1807	0	0	0
ARV1	194	20.954	152.35	131.25	259.67	130.06	12.18
ARVCF	0	0	0.11833	0.56839	0	4.8614	7.7338
ARX	0	0	0	12.165	0	0	0
AS3MT	19.259	20.483	34.589	28.375	20.575	14.802	15.255
ASAH1	328.54	31.518	123.31	197.34	165.36	654.11	250.01
ASAH2	8.8451	1.9834	4.3494	7.8403	0	0	0
ASAH2B	61.462	43.785	36.863	73.665	0	0	0
ASAP1	80.7	32.105	38.688	49.852	35.006	32.071	88.359
ASAP1-IT1	10.453	0	6.974	33.419	0	15.864	0
ASAP2	3.5642	33.526	4.5664	2.0759	16.185	1.5615	0
ASAP3	18.592	82.605	1.107	20.071	79.369	32.335	0
ASB1	30.766	9.307	28.41	44.87	0	5.006	20.1
ASB10	0	0	0	10.924	0	0	0
ASB11	5.1611	1.5256	18.813	13.939	15.19	3.9464	7.5618
ASB12	64.907	0	0	21.921	0	16.189	0
ASB13	124.07	63.801	29.955	14.454	0	48.881	0
ASB14	35.044	0	3.3342	7.2238	0	4.4891	0.83519
ASB15	0.9385	0	2.5082	8.2991	2.1528	0	0
ASB16	8.5227	7.0665	27.892	19.207	3.6693	4.8975	22.949
ASB16-AS1	171.16	9.434	152.46	155.07	72.115	31.612	173.69
ASB17	0	0	0	0	0	0	0
ASB18	0	0	0.83609	0.083241	0	0	0
ASB2	44.519	0	169.36	229.14	0	4.0196	105.43
ASB3	46.917	16.328	129.28	87.39	0	17.339	83.473
ASB4	4.179	0.97793	12.057	9.7259	6.1689	2.8389	9.5835
ASB5	0	0	0.79421	1.1098	0	0	0
ASB6	8.9007	39.263	60.851	96.354	61.397	73.885	82.348
ASB7	32.659	30.129	108.14	96.924	2.4242	40.078	51.303
ASB8	92.878	88.218	165.84	157.46	104.26	59.538	180.66
ASB9	0.38096	7.7815	0	0.8267	3.7299	18.065	0
ASB9P1	0	0	0	0	0	6.9413	0
ASCC1	108.45	91.237	192.37	135.97	10.19	53.224	1.7767
ASCC2	70.658	53.487	166.51	193.72	97.034	92.588	177.18
ASCC3	75.228	18.476	82.873	69.768	29.053	21.34	11.758
ASCL1	0	0	13.821	1.2616	0	0	0
ASCL2	0	0	0	12.375	0	10.934	0
ASCL3	0	0	9.5358	7.3589	0	7.5853	0
ASCL4	0.3632	0	0	7.0956	0	0	0
ASCL5	0	0	0	0	0	0	0
ASF1A	25.269	59.816	138.65	185.7	50.57	16.159	90.733
ASF1B	77.956	0	92.723	94.968	0	29.776	0
ASGR1	0	0	0	0.81626	10.228	71.953	0
ASGR2	0	0	0.98552	0	0	70.681	0
ASH1L	64.417	24.713	63.702	69.724	31.452	31.58	93.145
ASH1L-AS1	2.4105	4.3627	42.426	35.016	0	38.951	57.791
ASH2L	79.607	5.9303	100.78	101.37	55.553	54.702	168.47
ASIC1	0	3.3835	0	23.189	0	2.0872	0
ASIC2	0	0	1.4524	0.67975	0	0	0
ASIC3	0	0	27.276	8.0931	0	0	1.5249
ASIC4	0	0	0	1.5758	0	0	0.66455
ASIC5	0	0	1.5208	0.17515	0	0	0
ASIP	1.967	0	0	6.1501	0	14.746	0
ASL	6.2811	142.98	61.409	135.35	170.11	81.702	148.17
ASMT	5.9139	0	5.1277	17.781	0	0.80214	127.26
ASMTL	166.64	97.971	206.55	148.4	136.51	47.625	109.38
ASMTL-AS1	92.735	16.416	19.894	22.112	8.4822	17.798	15.595
ASNA1	91.518	89.579	219.15	145.96	122.38	90.244	242.94
ASNS	66.958	18.944	139.89	133.4	6.1118	58.218	28.226
ASNSD1	127.32	17.691	141.31	183.88	51.993	155.79	45.897
ASPA	0	73.5	0	1.2845	0	0	0
ASPDH	0	0	0	4.6359	0	0	0
ASPG	0	0	0.061564	1.0286	0	0	0
ASPH	47.787	63.979	40.746	73.799	90.137	171.93	44.255
ASPHD1	0	7.1417	0	0.24565	0	0	0
ASPHD2	26.57	0	13.122	18.421	0	20.013	0
ASPM	10.676	0	9.0292	18.049	0	13.699	22.295
ASPN	1.5429	452.73	7.404	12.265	0	0.98011	0
ASPRV1	0	0	27.088	11.469	0	0	24.767
ASPSCR1	82.612	89.524	131.8	115.28	34.273	37.698	0
ASRGL1	21.36	0	39.219	9.8548	42.501	68.164	14.512
ASS1	16.012	351.64	26.146	43.367	301.88	5.0379	152.48
ASTE1	106.28	0	136.63	166.89	58.145	23.109	142.38
ASTL	0	0	67.438	36.523	0	9.4653	0
ASTN1	0	22.19	0.62868	1.4015	0	0	0
ASTN2	431.59	240.3	1162.2	1475.5	257.31	145.51	360.18
ASUN	99.706	252.16	41.367	103.78	44.896	36.626	65.446
ASXL1	106.58	0	39.958	58.058	3.942	7.1274	69.755
ASXL2	23.176	0	52.431	74.178	23.535	13.175	32.667
ASXL3	5.0647	0	7.223	0.81341	10.61	0	0
ASZ1	3.6167	1.1235	6.2941	7.5354	7.1392	2.7313	2.945
ATAD1	198.04	30.722	200.65	161.7	19.018	63.22	152.72
ATAD2	27.57	13.818	53.924	68.161	0	13.415	26.67
ATAD2B	72.134	7.3493	62.355	59.95	11.881	30.653	94.857
ATAD3A	0	40.574	27.908	78.175	26.063	27.422	4.5446
ATAD3B	48.853	8.347	71.719	77.299	5.1235	33.192	13.344
ATAD3C	8.576	5.6694	20.47	13.125	18.725	2.5871	7.0886
ATAD5	38.303	0.36769	23.213	43.151	3.0663	10.263	28.154
ATAT1	30.414	38.731	32.024	75.691	169.4	7.4899	16.261
ATCAY	17.445	13.005	38.748	34.092	19.786	10.285	23.659
ATE1	94.844	4.8188	98.975	70.256	38.069	20.063	79.751
ATF1	83.78	7.4983	61.194	76.023	7.4508	28.601	190.8
ATF2	94.266	20.774	117.8	180.01	31.507	55.681	243.57
ATF3	32.369	498.83	135.5	192.98	480.33	471.18	0
ATF4	348.12	230.21	473.05	438.47	411.7	249.6	438.39
ATF5	2.5221	39.273	12.01	8.2514	0	69.096	5.7041
ATF6	65.654	7.9422	56.249	73.022	52.172	46.497	56.903
ATF6B	150.24	147.09	204.78	159.01	56.319	75.883	256.28
ATF7	182.73	39.036	89.594	108.72	38.914	50.588	54.877
ATF7IP	336.33	110.43	224.19	244.82	53.631	88.155	145.68
ATF7IP2	86.394	0	76.732	81.729	0	7.0626	7.6763
ATG10	34.1	15.754	89.691	42.536	19.889	7.5693	19.34
ATG12	96.521	14.599	99.357	95.087	52.758	45.211	94.002
ATG13	36.562	31.602	82.341	91.425	46.774	29.949	22.007
ATG14	81.637	1.3374	49.179	60.534	58.623	16.32	33.628
ATG16L1	45.442	10.338	193.93	115.97	178.63	35.061	56.069
ATG16L2	107.61	112.73	87.812	147.21	66.766	87.259	92.009
ATG2A	9.5564	1.9092	47.468	31.2	17.557	23.271	15.863
ATG2B	24.056	13.176	21.904	25.469	34.893	7.5298	16.921
ATG3	174.03	177.78	348.66	333.39	266.97	344.17	696.26
ATG4A	32.972	24.345	57.086	91.763	54.38	25.201	0.30713
ATG4B	103.21	16.275	132.7	140.15	148.81	69.082	28.38
ATG4C	171.75	0	35.581	58.168	0	49.823	35.88
ATG4D	42.696	21.121	49.136	64.886	0	23.996	0
ATG5	86.795	28.681	108.84	137.27	43.081	54.482	60.459
ATG7	22.984	18.973	96.907	66.945	24.248	59.165	20.441
ATG9A	57.801	106.49	110.92	148.76	85.873	36.952	123.19
ATG9B	0	0	35.855	24.142	10.034	14.94	0
ATHL1	108.07	177.01	157.94	311.16	30.985	29.031	143.03
ATIC	271.67	170.58	173.82	240.94	0	76.621	93.62
ATL1	52.758	34.609	0	47.244	7.0823	0.019878	0
ATL2	105.14	52.269	96.89	90.616	159.9	10.149	147.05
ATL3	42.191	22.377	18.111	83.419	166.85	23.57	61.473
ATM	45.882	5.9849	56.449	62.57	2.5157	10.483	74.426
ATMIN	26.51	12.912	33.629	42.889	25.258	4.2656	10.591
ATN1	11.404	16.863	13.535	19.917	12.518	8.4856	38.025
ATOH1	0	0	0	0	0	0	0
ATOH7	0	0	0	0	0	0	0
ATOH8	0	0	2.5044	0.59118	0	0.26431	0
ATOX1	107.4	147.17	208.9	131.32	277.66	346.07	302.5
ATP10A	0.54733	89.601	15.929	33.138	0	16.864	90.013
ATP10B	0	0	0.4069	2.8668	0	2.0384	0
ATP10D	63.146	16.029	20.801	36.761	27.245	9.8241	42.798
ATP11A	16.924	8.0733	35.537	19.559	16.008	22.495	28.191
ATP11B	34.167	5.8186	44.847	56.046	0	15.636	19.554
ATP11C	16.274	6.0778	45.104	44.696	14.666	36.956	3.3381
ATP12A	0	0	9.7133	0.75117	0	0	0
ATP13A1	104.5	37.73	88.182	96.745	12.702	91.286	95.68
ATP13A2	4.0664	25.545	63.215	38.194	4.9728	21.041	11.883
ATP13A3	8.7956	1.766	30.61	30.06	14.567	40.666	1.918
ATP13A4	0	0	2.0439	12.463	0	0	0
ATP13A5	0	0	0.82701	0.38349	0	0	0
ATP1A1	131.77	83.419	220.45	209.08	229.81	109.56	70.289
ATP1A1OS	62.982	42.339	73.953	64.794	61.003	26.938	141.57
ATP1A2	2.6912	0.10606	7.1478	3.047	4.0708	1.1826	2.5645
ATP1A3	0.22021	0	23.603	61.833	0	0	39.079
ATP1A4	0	10.709	25.23	4.3243	0	0.85805	0
ATP1B1	0.84198	17.695	76.398	46.856	9.563	132.72	69.261
ATP1B2	6.0091	3.2882	11.795	8.859	12.057	2.6704	4.102
ATP1B3	219.66	130.81	364.38	405.72	391.62	367.83	374.79
ATP1B4	7.6549	2.895	15.466	12.523	7.4021	4.8085	14.739
ATP2A1	0.74315	5.9043	1.7911	1.0766	0	0	0
ATP2A2	4.8548	40.344	33.324	21.554	11.117	22.856	45.377
ATP2A3	135.07	0	119.84	88.439	14.558	13.592	110.04
ATP2B1	141.04	18.036	72.477	44.939	43.291	65.863	144.78
ATP2B2	0.61972	0	0.22238	1.2159	0	0	0
ATP2B3	0	0	0	0.014261	0	0	0
ATP2B4	27.101	33.959	79.472	84.464	28.912	8.1429	83.646
ATP2C1	60.84	114.7	49.586	87.876	4.0643	86.851	28.112
ATP2C2	4.6403	0.68588	0.74972	11.099	0	0	0
ATP4A	0	0	2.2382	0.25477	0	0	0
ATP4B	0	0	0	5.5916	0	0	0
ATP5A1	534.97	423.62	560.15	679.08	270.68	270.33	638.69
ATP5B	580	367.78	688.28	847.2	252.09	343.84	689.74
ATP5C1	350.84	184.45	372.78	460.64	280.88	282.56	447.42
ATP5D	380.16	127.39	310.62	292.34	167.79	165.42	290.63
ATP5E	623.31	248.69	577.75	695.99	327.61	872.87	585.45
ATP5EP2	48.913	12.561	56.385	44.745	124.24	62.342	63.438
ATP5F1	385.53	241.74	280.5	322.21	210.69	189.3	266.24
ATP5G1	271.94	325.32	361.09	256.12	137.01	104.61	466.52
ATP5G2	495.37	296.04	386.9	491.38	257.92	347.37	347.62
ATP5G3	146.96	94.075	117.23	123.24	49.575	115.87	131.59
ATP5H	361.83	225.54	303.63	310.94	175.5	227.58	390.14
ATP5I	272.31	224.27	293.95	255.52	102.08	387.09	237.84
ATP5J	206.13	191.22	234.14	261.17	123.37	158.22	319.91
ATP5J2	192.05	96.869	269.99	205.06	63.51	219.18	184.51
ATP5J2-PTCD1	3.6004	1.3399	4.0129	8.4078	0	2.9071	2.8633
ATP5L	168.69	92.789	231.29	249.53	183.08	145.51	198.99
ATP5L2	91.756	17.075	49.726	11.082	13.628	14.406	17.091
ATP5O	427.65	162.57	698.99	468.03	189.36	401.05	514.82
ATP5S	25.146	29.403	118.19	116.13	35.723	26.976	76.633
ATP5SL	54.722	228.76	187.85	197.32	182.43	95.269	268.89
ATP6AP1	230.56	313.79	267.49	310.81	106.16	381.4	285.09
ATP6AP1L	0	0	0	9.4023	0	10.85	0
ATP6AP2	400.81	171.19	315.8	401.49	107.87	272.92	184.62
ATP6V0A1	165.15	36.296	36.885	11.213	28.978	148.81	1.1208
ATP6V0A2	25.523	8.1753	24.663	69.576	17.675	3.0041	6.5492
ATP6V0A4	0	0	0.55662	2.413	0	0.051901	1.3004
ATP6V0B	363.32	228.5	482.36	349.86	468.95	721.42	428.41
ATP6V0C	69.214	33.907	96.027	57.712	98.551	126.58	116.93
ATP6V0CP3	0	0	0	0	0	0	0
ATP6V0D1	234.72	152.78	176.75	255.88	129.05	294.75	402.06
ATP6V0D2	8.3065	1.4289	11.05	9.5191	5.5055	8.0245	8.7668
ATP6V0E1	799.63	285.73	637.21	613.93	483.19	458.34	791.67
ATP6V0E2	83.324	23.346	223.88	208	0	56.481	147.01
ATP6V0E2-AS1	2.4509	0	15.313	12.349	0	1.6354	0
ATP6V1A	72.459	50.62	111.16	157.6	38.316	117.75	176.43
ATP6V1B1	0	7.8451	1.9337	5.47	0	0	0
ATP6V1B2	225.85	39.049	179.52	196.62	31.352	310.61	0.4149
ATP6V1C1	83.191	15.796	35.144	68.503	20.912	68.995	92.905
ATP6V1C2	10.915	0	0	12.282	71.529	0	0
ATP6V1D	23.12	68.507	189.66	142.99	97.675	46.582	243.87
ATP6V1E1	180.33	135.92	253.32	291.59	170.74	168.04	165.75
ATP6V1E2	4.4827	0	0	6.755	0	0	0
ATP6V1F	255.53	212.59	331.63	309.18	201.41	413.3	607.76
ATP6V1G1	277.44	90.651	295.18	254.85	48.73	214.88	254.06
ATP6V1G2	0	0	51.653	13.347	0	10.378	0
ATP6V1G2-DDX39B	0	0	12.969	0.58002	0	0	0
ATP6V1G3	1.9556	0	0	11.193	0	0	0
ATP6V1H	55.647	53.884	155.03	163.09	205.98	119.99	0
ATP7A	23.366	18.812	44.016	49.757	7.5741	15.31	2.5581
ATP7B	0	9.709	0.38575	1.5204	0	10.409	0
ATP8A1	59.636	0	42.684	81.736	5.8161	3.8422	16.146
ATP8A2	0	0	0.96548	10.254	4.2945	0	0.42208
ATP8B1	23.129	3.3816	6.3646	9.1989	43.296	3.0549	5.9569
ATP8B2	2.2437	11.787	90.823	43.153	20.318	3.4559	63.343
ATP8B3	0	0	8.4065	6.8689	0	5.4216	0
ATP8B4	0	0.13788	0.63507	43.879	0	33.446	117.01
ATP8B5P	0	0.22981	28.054	8.9393	0	0.13881	0.29816
ATP9A	0	8.1529	15.566	28.277	0.429	0.60074	28.979
ATP9B	31.216	18.725	45.402	85.584	84.425	50.808	146.6
ATPAF1	30.942	104.6	33.71	82.67	0	51.008	0
ATPAF2	123.53	19.856	116.53	96.063	67.812	75.154	150.61
ATPBD4	23.614	0	113.53	83.826	20.542	35.402	10.848
ATPBD4-AS1	0	0	1.0611	9.5394	0	1.2033	0
ATPIF1	409.7	308.1	450.57	483.36	649.84	279.24	540.92
ATR	40.055	4.3046	72.454	49.346	1.1036	32.635	18.571
ATRAID	533.94	372.53	651.09	467.8	250.28	666.63	508.96
ATRIP	7.5265	18.307	43.614	52.973	20.6	4.21	0
ATRN	5.2572	18.681	13.008	50.477	52.379	48.702	7.2448
ATRNL1	0.24891	0	24.978	1.4626	0	1.6996	0
ATRX	98.16	17.304	78.894	105.28	43.388	22.129	74.523
ATXN1	16.573	11.539	29.619	43.601	12.052	7.8295	5.6144
ATXN10	160.99	181.51	173.49	200.76	72.593	56.826	149.89
ATXN1L	46.078	5.2924	13.209	49.431	7.9023	16.935	39.97
ATXN2	36.612	13.303	42.218	80.42	8.9134	24.529	29.313
ATXN2L	61.81	13.198	61.805	62.611	6.935	41.573	89.531
ATXN3	42.028	11.583	34.508	31.64	55.825	12.203	52.641
ATXN3L	0	0	0	0.75638	0	0	0
ATXN7	10.049	8.6047	72.085	60.331	21.532	31.47	49.128
ATXN7L1	44.4	26.393	73.278	76.247	19.534	16.687	65.1
ATXN7L2	57.817	0	51.293	37.075	7.8514	1.3656	0
ATXN7L3	55.617	1.3957	32.136	42.92	0	9.0343	88.539
ATXN7L3B	150.48	67.22	194.67	176.3	34.572	51.396	148.67
ATXN8OS	0.76577	0	2.7458	1.3668	0	0.085032	0.093398
AUH	93.754	25.414	115.29	119.68	7.2405	37.674	139.87
AUNIP	6.4547	1.1592	7.1267	20.856	4.4697	4.7588	7.6103
AUP1	306.23	215.88	291.06	276.65	190.44	229.66	257.23
AURKA	6.8844	106.68	39.622	58.666	59.021	46.635	3.6262
AURKAIP1	253.06	240.94	358.65	247.32	89.694	128.7	304.18
AURKAPS1	0	0	55.91	57.516	0	2.4723	62.358
AURKB	66.788	0	28.149	66.959	0	145.87	0
AURKC	0	0	0	6.0255	0	76.324	0
AUTS2	18.525	24.799	12.126	22.145	7.684	1.0035	130.2
AVEN	0.23876	8.4642	2.64	16.886	12.51	0	0
AVIL	3.5613	39.457	4.7389	9.1334	0	1.1906	1.2932
AVL9	168.26	0	80.719	110.89	33.226	59.199	121.38
AVP	0	0	0	0.64771	0	0	0
AVPI1	19.048	29.828	58.945	79.361	0	81.636	189.3
AVPR1A	1.3644	1.4708	1.916	15.412	1.3632	0.80948	3.3732
AVPR1B	10.749	0	0	1.5382	0	0	0
AVPR2	0	0	0	3.6873	13.128	0.98063	0
AWAT1	0	0	0	0	0	0	0
AWAT2	0	0	6.634	0.21879	0	0	0
AXDND1	0	0	1.9918	1.0801	0	1.4624	0
AXIN1	41.427	34.627	45.862	49.108	1.7126	43.147	94.379
AXIN2	53.847	17.417	12.391	1.0108	0	0	0
AXL	8.9876	174.31	50.399	38.843	7.3717	238.28	11.491
AZGP1	0	0	0.7477	4.9374	0	0	1.3758
AZGP1P1	0	0	1.4893	14.386	0	0	0
AZI1	60.797	36.77	48.077	22.975	31.033	31.139	2.4696
AZI2	47.875	44.687	126.16	136.52	98.61	87.545	125.21
AZIN1	94.846	49.139	144.6	208.88	40.734	96.177	107.01
AZU1	0	0	0.86102	0.30443	0	21.322	0
B2M	6069.2	8756.5	10507	14226	5699.1	9666.3	8102.8
B3GALNT1	16.209	3.2208	6.1798	9.3918	7.0792	20.802	1.2214
B3GALNT2	19.924	25.938	11.763	37.877	51.253	12.115	58.907
B3GALT1	0	0	13.181	2.1726	0	0	0
B3GALT2	0.4902	0	11.994	37.396	0	3.6798	8.5676
B3GALT4	140.23	89.884	101.54	79.261	0	106.42	108.3
B3GALT5	0	0	0	1.1066	0	0	0
B3GALT6	0	121.09	10.769	33.283	0	11.63	24.822
B3GALTL	61.77	59.432	1.3052	63.468	57.477	16.076	89.023
B3GAT1	0	0	28.595	8.0047	0	0	48.707
B3GAT2	0	0	0	0.44289	0	0	0
B3GAT3	142.56	177.61	198.6	137.44	116.06	68.171	306.99
B3GNT1	168.95	1.5167	88.156	82.298	0	28.113	0
B3GNT2	41.868	7.6296	94.588	221.08	39.844	24.273	242.11
B3GNT3	0.71857	0.26162	0.9842	3.8268	10.864	0.56243	0.23708
B3GNT4	0	0	0	1.2847	0	0	0
B3GNT5	0	0	23.102	11.099	20.746	104.62	0
B3GNT6	9.8559	13.694	16.884	27.108	10.07	8.5236	17.55
B3GNT7	24.929	0	8.9522	9.3211	0	69.385	345.15
B3GNT8	0	26.036	0.15025	2.183	0	51.101	0
B3GNT9	0.90419	15.591	47.66	5.1544	3.4403	5.9092	0
B3GNTL1	4.6604	137.15	163.34	85.972	5.3033	47.747	79.181
B4GALNT1	0	30.893	0.75749	3.3944	0	0.041965	0
B4GALNT2	0	0	0	0.22343	0	0	0
B4GALNT3	0	0	27.355	23.405	0	5.0713	50.773
B4GALNT4	0	4.5858	2.7269	0	0	0	0
B4GALT1	146.73	139.44	147.81	121.84	64.144	145.53	186.01
B4GALT2	0	13.883	22.486	5.5517	19.665	5.9904	0
B4GALT3	212.46	34.196	199.27	180	178.29	55.249	106.46
B4GALT4	68.337	7.1595	105.15	91.146	47.919	35.194	192.11
B4GALT5	26.922	6.9204	25.429	19.422	15.502	30.604	40.432
B4GALT6	0	3.1926	0.76141	29.762	8.3578	2.9323	44.622
B4GALT7	124.03	81.212	111.69	114.46	62.598	41.783	0
B9D1	97.646	21.903	23.181	25.252	0	1.324	214.16
B9D2	5.7553	62.968	143.7	133.32	44.251	49.358	0
BAALC	0	0	1.7072	8.5918	0	0	6.9972
BAAT	0.043177	0	9.6391	6.3406	0	0.59231	0.75762
BABAM1	231.96	129.66	187.87	242.98	156.71	124.24	145.71
BACE1	15.338	25.389	1.9117	14.486	12.107	5.6281	42.82
BACE1-AS	11.261	3.7545	83.46	71.71	146.45	9.585	13.763
BACE2	134.93	25.633	6.2201	22.423	103.3	8.9272	24.526
BACH1	176.51	14.782	60.04	60.129	0	92.562	75.521
BACH2	48.263	0	14.494	15.314	0	4.1446	4.9673
BAD	117.24	94.347	181.81	173.24	117.5	229.5	267.56
BAG1	29.055	0.61476	35.84	31.653	23.731	44.062	57.927
BAG2	129.75	41.369	47.023	34.537	0	5.153	134.63
BAG3	19.834	115.89	50.671	89.788	107.14	44.831	0
BAG4	45.092	7.6503	63.864	83.839	20.577	52.121	36.137
BAG5	43.486	21.41	47.421	94.809	74.572	29.719	51.742
BAG6	34.324	44.337	51.739	42.517	62.977	33.411	27.705
BAGE	0	0	8.1409	8.7274	0	0.29008	1.6758
BAGE2	0	0	0.67573	0.30557	0	0	0
BAGE3	0	0	0.67573	0.30557	0	0	0
BAGE4	0.10436	0	0.25181	0.56275	0	0.21477	0.14346
BAGE5	4.4073	0	10.623	8.1192	0	3.6312	5.7289
BAHCC1	0	1.4829	1.0525	1.4323	9.5445	0	0.062864
BAHD1	0	0	9.8094	27.545	11.158	20.131	43.342
BAI1	0	0	0	1.5899	0	0.63607	0.11495
BAI2	4.7621	0	1.4613	0.83973	0	0	0
BAI3	0.35558	0	0.2799	2.1682	0	0.064051	0
BAIAP2	22.485	93.134	8.265	30.413	33.578	56.275	22.163
BAIAP2-AS1	8.2123	5.6759	15.905	13.973	11.914	10.392	32.358
BAIAP2L1	1.0226	0	28.923	7.5651	16.152	2.7196	0.88368
BAIAP2L2	0	12.438	0.65083	3.1286	0	2.8555	0
BAIAP3	46.441	0	23.855	13.968	0	0	78.598
BAK1	113.12	98.63	213.39	177.75	155.89	131.55	304.63
BAMBI	7.2245	5.3031	3.5387	11.67	0	30.322	0
BANCR	0	27.637	58.388	42.836	0	9.07	92.942
BANF1	138.84	94.269	152.91	163.25	101.97	119.66	211.35
BANF2	0	0	0	1.1841	0	0	0
BANK1	527.36	14.209	2.9626	1.8396	0	26.543	67.542
BANP	24.746	0	135.6	130.96	101.38	41.469	213.82
BAP1	69.474	86.496	98.756	135.07	77.897	27.791	136.74
BARD1	42.815	0	144.05	106.48	0	24.375	98.773
BARHL1	0	0	0	0.56837	0	0	0
BARHL2	0	0	0	2.324	0	0	0
BARX1	0	0	0	0	0	0	0
BARX2	0.70736	0	5.6387	30.559	0	0.44514	0
BASP1	72.799	25.153	25.412	10.168	0	37.083	0
BASP1P1	0	0	0	4.3448	0	0	0
BATF	89.086	0	742.15	535.51	0	95.561	401.64
BATF2	0	1.248	0.53872	17.736	0	63.462	0
BATF3	0	0	4.2597	27.001	49.688	48.761	0
BAX	123.44	36.45	175.57	113.22	50.302	149.89	189.39
BAZ1A	80.36	24.583	60.679	77.315	33.291	75.246	4.6991
BAZ1B	92.37	32.353	79.233	61.342	17.989	14.916	71.314
BAZ2A	55.3	40.464	44.487	59.979	29.837	24.996	33.774
BAZ2B	35.123	10.237	77.993	70.227	81.933	35.295	50.672
BBC3	0	0	22.593	19.304	0	7.2885	0
BBIP1	47.493	6.1493	63.346	109.29	14.639	25.885	40.016
BBOX1	0	1.7041	0.73023	0.72729	0	0	0
BBS1	11.028	20.825	80.337	31.591	18.639	10.893	0.53524
BBS10	6.2443	0	45.999	52.232	31.268	13.881	0
BBS12	0	0	75.794	50.478	0	0.3611	95.97
BBS2	128.46	30.64	142.14	148.03	70.475	54.507	223.46
BBS4	2.8852	48.05	67.343	180.81	52.301	21.969	55.278
BBS5	22.025	21.504	53.805	40.784	16.27	8.0924	14.761
BBS7	38.807	14.499	13.721	83.912	42.278	4.9876	73.369
BBS9	56.421	9.0326	48.922	39.477	28.772	6.0075	0.32869
BBX	72.755	12.465	51.778	82.919	29.491	24.698	32.777
BCAM	0	0	0	1.2387	200.79	0.1598	0
BCAN	27.548	29.667	10.371	30.171	0	3.7812	0
BCAP29	14.02	15.442	42.444	65.478	22.859	31.389	29.296
BCAP31	337.92	165.06	411.38	338.23	202.36	290.16	483.63
BCAR1	0.73913	0	3.434	15.395	154.45	1.9901	0
BCAR3	52.186	10.508	13.118	0.38912	7.9806	33.001	0
BCAR4	10.192	0	5.2561	0.71344	0	0.52895	10.157
BCAS1	11.125	44.936	20.208	9.6837	3.7167	2.1404	5.6022
BCAS2	259	114.8	316.99	271.93	27.112	134.39	257.84
BCAS3	8.8093	21.832	70.793	110.05	86.151	15.648	33.332
BCAS4	323.47	0	108.26	206.26	16.423	2.2388	150.35
BCAT1	1.2209	66.732	11.207	27.473	1.3666	34.708	9.2905
BCAT2	47.901	25.455	82.551	94.008	123.37	27.152	151.1
BCCIP	296.57	39.772	123.41	178.47	84.059	78.844	320.4
BCDIN3D	51.018	16.232	67.894	74.015	7.0678	28.583	1.9707
BCDIN3D-AS1	5.6034	4.796	9.873	36.936	5.8422	3.5457	9.4671
BCHE	0	19.346	6.9237	26.277	0	9.155	0
BCKDHA	191.36	32.868	229.55	187.78	20.313	112.37	294.96
BCKDHB	128.65	77.212	70.891	99.042	8.4142	43.031	79.332
BCKDK	74.834	107.92	128.74	170.75	74.211	390.48	290.74
BCL10	161.6	18.079	92.348	91.844	80.409	51.025	53.764
BCL11A	394.11	0	6.907	1.0095	0	21.468	5.9308
BCL11B	0	1.5698	81.306	60.651	0	0.19436	33.924
BCL2	75.413	8.1142	80.837	59.256	0	8.7288	39.518
BCL2A1	270.33	0	293.5	227.74	0	1234.2	186.25
BCL2L1	48.635	86.844	104.66	78.591	41.315	51.224	109.67
BCL2L10	0	0	0	2.8615	0	0	2.281
BCL2L11	118.15	9.3227	119.12	167.61	73.176	37.354	105.66
BCL2L12	41.545	0	28.206	32.397	22.134	52.938	25.757
BCL2L13	19.83	73.947	103.21	77.028	30.179	28.744	4.2422
BCL2L14	0	0	29.049	34.615	0	3.5536	0
BCL2L15	10.913	2.9982	18.268	16.895	8.8804	8.3298	9.6354
BCL2L2	0	6.9575	0	8.2191	18.497	6.9853	0
BCL2L2-PABPN1	28.376	42.5	47.3	42.204	52.146	35.286	58.322
BCL3	19.643	56.838	81.666	53.704	48.888	58.096	7.2706
BCL6	158.98	57.003	152.89	135.64	50.539	93.29	99.426
BCL6B	0	0	0	4.4749	54.967	0	0
BCL7A	26.396	31.057	0.53911	11.113	2.7318	1.3091	2.7445
BCL7B	27.584	34.293	130.43	156.69	66.472	57.973	123.58
BCL7C	75.469	0	42.769	55.305	0	13.299	18.56
BCL9	0.7366	8.6586	16.191	15.889	22.786	3.7956	10.924
BCL9L	16.88	8.8571	31.914	32.391	10.383	20.493	38.702
BCLAF1	112.98	25.286	103.06	137.36	44.211	48.319	120.3
BCMO1	0	0	0	2.1508	0	0	0
BCO2	0.35051	0	8.9974	31.056	0	2.764	6.3582
BCOR	86.603	0	48.094	76.366	15.933	11.28	61.611
BCORL1	9.4304	0	8.344	8.0817	16.83	2.2942	11.976
BCORP1	0.66508	0	0.82298	50.774	0	0.4124	57.682
BCR	0.66172	2.4821	40.72	29.167	53.922	7.3105	43.209
BCRP2	15.47	0	35.775	17.827	4.8095	3.3357	7.7411
BCRP3	5.408	1.0394	11.273	6.8129	0	1.6641	1.8751
BCS1L	5.0707	116.67	78.604	140.89	81.444	91.136	107.27
BCYRN1	36.508	290.94	70.284	76.237	0	66.489	107.3
BDH1	16.762	3.965	23.169	71.2	6.2193	42.611	56.294
BDH2	50.556	26.243	51.371	80.251	101.56	28.052	52.199
BDKRB1	0	28.067	0.17438	0.40567	0	0.233	0
BDKRB2	0	0	4.0556	0	64.011	0	0.084415
BDNF	0	0	4.2238	1.0908	0	1.6233	0
BDNF-AS	28.925	42.453	8.4478	12.833	0	9.9237	5.2195
BDP1	35.096	10.455	26.795	33.785	14.237	13.76	29.771
BEAN1	0.67941	2.984	0	7.4994	0	15.555	0
BECN1	268.03	118.81	221.24	278.88	164.64	95.41	334.37
BEGAIN	0	0	0	2.3633	0	0	0
BEND2	41.722	5.7451	5.8387	6.4965	2.6521	2.8588	4.5875
BEND3	1.2818	0	1.1423	2.7309	0	0	2.3575
BEND3P3	38.476	4.8509	25.924	20.833	2.4754	14.843	42.87
BEND4	85.607	0	15.391	14.503	0	0.40087	0
BEND5	116.21	12.505	0	34.238	0	20.178	0
BEND6	2.1627	9.3499	12.844	5.6618	0	0	0
BEND7	0	23.644	2.8372	2.2958	4.9568	0	0
BEST1	0	0.78488	17.499	25.441	0	29.918	43.55
BEST2	0	0	0	0.52377	0	0	0
BEST3	0	0	0	6.7567	0	0	0
BEST4	11.911	0	4.3901	17.676	0	0	0
BET1	48.43	11.025	26.299	87.175	46.776	8.2337	0
BET1L	154.76	65.795	91.845	166.57	100.11	41.844	175.11
BET3L	0	0	0	7.9205	0	0	0
BEX1	0	0	0.44452	58.282	0	413.1	0
BEX2	213.37	0	221.58	171.64	0	173.94	96.1
BEX4	63.423	33.071	180.56	217.04	0	113.8	400.29
BEX5	11.951	0	66.504	75.533	0	0	0
BFAR	106.19	29.013	131.45	127.09	58.282	25.851	88.841
BFSP1	0	0	3.5747	11.833	18.25	0	0
BFSP2	17.887	0	22.418	13.632	0	14.978	0
BGLAP	0	0	0	6.3154	0	0.60736	0
BGN	0	1450.3	0.68656	1.856	235.22	35.098	0
BHLHA15	0	0	0	12.036	0	0	0
BHLHA9	0	0	0	0	0	0	0
BHLHB9	0	0.21567	18.49	44.727	5.0804	3.7104	32.861
BHLHE22	0	0	0	0	0	0	0
BHLHE23	0	0	0	0	0	0	0
BHLHE40	94.614	179.45	250.67	260.24	178.01	141.45	552.58
BHLHE40-AS1	77.253	0	129.04	100.13	0	9.0313	35.489
BHLHE41	11.187	0.66044	4.7031	8.7431	0	52.341	0
BHMT	0	0	0.45854	0.54723	0	0	0
BHMT2	12.658	64.389	41.857	32.484	22.323	8.9005	18.033
BICC1	0	115.07	0	2.1825	0	0	0
BICD1	77.762	3.7016	31.536	46.088	28.448	4.8893	34.031
BICD2	32.318	20.88	62.338	81.649	57.839	43.04	39.527
BID	118.23	0.27929	99.668	125.57	123.6	158.4	223.69
BIK	271.2	0	0	55.321	0	51.759	0
BIN1	255.15	56.037	182.75	233.22	2.9488	105.23	253.58
BIN2	195.6	0	390.64	439.88	0	165.88	567.46
BIN3	97.388	51.034	221.05	173.24	107.81	88.472	168.55
BIRC2	107.71	27.427	130.01	203.93	23.837	105.08	159.29
BIRC3	239.07	4.3277	158.23	185.33	5.7063	32.009	65.931
BIRC5	52.777	465.23	29.611	76.861	48.754	37.296	0.13471
BIRC6	43.87	16.239	49.897	49.94	28.488	22.716	57.47
BIRC7	0	0	43.625	44.852	0	112.3	0
BIRC8	0	0	0	0	0	0	0
BIVM	4.3335	34.281	16.53	67.773	22.412	6.0418	55.456
BIVM-ERCC5	0	2.4268	8.1993	7.4069	6.4284	0	0
BLCAP	381.1	145.72	152.34	239.67	52.825	282.54	87.542
BLID	0	0	0	0	0	0	0
BLK	224.81	0	17.169	43.028	0	0	0
BLM	39.998	0	108.87	39.364	0	35.357	53.155
BLMH	97.362	66.679	124.73	133.59	55.555	72.893	153.92
BLNK	388.63	0	2.2858	2.4062	0	108.28	0
BLOC1S1	250.29	112.2	312.66	250.76	183.24	390.92	564.05
BLOC1S1-RDH5	0	0	4.7402	14.453	0	2.593	28.058
BLOC1S2	139.57	48.872	75.755	100.82	51.475	76.528	99.57
BLOC1S3	61.718	4.7521	123.12	91.453	30.076	50.597	170.41
BLOC1S4	70.528	4.2745	109.34	81.528	0	2.6036	0.29096
BLOC1S5	127.04	26.138	125.27	122.32	16.261	49.922	136.34
BLOC1S5-TXNDC5	0	12.177	0	5.0981	0	0	0
BLOC1S6	124.72	11.119	98.268	119.45	65.222	61.178	44.224
BLVRA	205.6	70.228	199.54	226.39	46.01	227.8	169.3
BLVRB	1.2076	95.534	111.97	166.84	70.179	797.07	173.27
BLZF1	69.142	16.43	70.258	88.71	8.4688	47.151	19.169
BMF	4.0626	3.3516	18.602	24.949	0	12.813	0
BMI1	0	0	54.231	53.02	0	2.3093	47.013
BMP1	23.866	130.22	28.208	36.86	65.99	5.0559	0
BMP10	0	0	0	0	0	0	0
BMP15	0	0	0	4.0399	0	0	0
BMP2	0	0	2.8968	12.996	3.1748	0	0
BMP2K	49.415	2.0789	18.373	28.044	0	72.345	0
BMP3	1.0951	2.5644	2.3645	4.2377	0.15076	1.3979	0.64427
BMP4	0.086355	40.171	0.82048	48.746	45.149	0	0
BMP5	0	0	1.522	0.17013	0	0	0
BMP6	0	0	5.6839	9.8151	35.411	0	0
BMP7	6.6957	3.4101	12.985	14.442	10.215	2.957	9.6785
BMP8A	15.656	104.26	22.479	44.833	2.9171	7.2285	148.79
BMP8B	8.2485	0.61374	6.4034	5.6832	2.2849	4.3604	2.2537
BMPER	0	0	0.53818	13.274	3.9075	0.07178	0.25325
BMPR1A	2.4595	21.217	0	53.888	0	0	0
BMPR1B	1.0602	0.58336	0.20942	11.977	0	0	0
BMPR2	39.622	16.433	18.578	25.881	63.644	22.002	4.7465
BMS1	46.96	13.675	57.448	54.383	30.975	18.141	44.24
BMS1P1	67.673	21.924	37.607	48.034	16.225	19.254	18.695
BMS1P2	29.28	5.9302	15.014	23.227	1.9405	9.9147	20.421
BMS1P4	22.569	14.841	19.279	60.864	17.589	14.755	8.3988
BMS1P5	69.183	21.651	36.469	45.97	22.326	17.817	20.791
BMS1P6	29.297	5.9302	15.572	24.311	1.939	9.9854	17.204
BMX	0	0	10.287	1.8583	0	0	0
BNC1	0	0	0	0.92983	0	0	0
BNC2	1.408	13.399	1.4159	9.137	16.732	11.39	31.06
BNIP1	30.331	14.39	144.36	122.96	45.724	109.92	400.34
BNIP2	282.58	44.514	218.24	250.9	168.99	149.17	236.17
BNIP3	151.2	32.284	116.58	128.74	58.381	143.03	50.984
BNIP3L	77.71	34.638	130.2	136.98	71.895	342.04	57.791
BNIPL	12.257	7.5999	24.289	23.846	18.866	5.7178	10.6
BOC	0	75.279	0.86876	2.6404	70.444	0	0
BOD1	134.22	26.376	24.605	40	52.701	19.181	0
BOD1L1	38.083	5.156	37.1	41.798	13.077	16.685	64.779
BOD1L2	0	0	9.8415	0.068902	0	0	0
BOK	0	124.23	17.663	17.195	119.64	15.322	30.008
BOK-AS1	0	0	0	0.8192	0	1.0565	0
BOLA1	111.35	39.598	120.27	259.58	117.87	66.669	0
BOLA2	36.045	6.8171	66.084	34.341	5.3569	29.561	31.942
BOLA2B	36.045	6.8171	66.084	34.341	5.3569	29.561	31.942
BOLA3	62.635	67.381	169.65	124.49	57.098	49.12	13.665
BOLA3-AS1	9.1548	2.7123	17.086	29.293	11.673	20.536	4.925
BOLL	0	0	0.82439	1.915	0	0	0
BOP1	115.05	64.572	29.468	91.086	100.92	24.74	0
BORA	57.547	26.827	67.41	100.74	59.445	8.952	10.34
BPESC1	0.35432	0	7.4193	5.8613	0	3.7693	0
BPGM	115.21	166.5	257.87	167.93	120.54	33.615	245.13
BPHL	74.09	45.82	68.611	61.521	46.595	44.956	36.236
BPI	0	0	1.8832	0.20773	0	31.589	0
BPIFA1	1.2751	0	0	0.40188	0	0	0
BPIFA2	0	0	0	0.37508	0	0	0
BPIFA3	0	0	0	0.95615	0	0	0
BPIFA4P	0	0	0.98174	0.73573	0	0	0
BPIFB1	0	0	0.67262	3.0262	2.1799	0	0
BPIFB2	0	0	1.8069	0.17599	0	0	0
BPIFB3	0	0	0	0	0	0	0
BPIFB4	0	7.9227	1.0595	0.73507	0	0	0
BPIFB6	0	0	0	0	0	0	0
BPIFC	0	0	4.4157	4.0151	0	0	0
BPNT1	54.842	32.968	91.709	62.501	18.154	30.299	16.455
BPTF	64.39	20.941	64.303	48.877	14.841	9.2368	99.441
BPY2	0	0	3.1429	0	0	0	0
BPY2B	0	0	3.1429	0	0	0	0
BPY2C	0	0	3.1429	0	0	0	0
BRAF	57.403	41.602	64.094	63.74	17.959	14.682	19.79
BRAP	88.363	7.2615	87.691	82.107	0	64.156	161.93
BRAT1	104.37	5.5151	168.64	169.74	104.97	90.179	197.55
BRCA1	16.576	0.50671	11.93	20.69	2.4161	4.2028	8.2582
BRCA2	15.163	1.2728	7.4887	20.43	0.56684	9.7397	0.26413
BRCC3	119.62	16.68	86.385	79.33	22.06	47.343	17.058
BRD1	9.3406	10.844	59.709	30.304	17.296	13.168	38.701
BRD2	157.54	33.263	161.79	168.2	114.46	77.409	211.02
BRD3	77.782	89.855	113.15	84.374	87.759	53.758	204
BRD4	46.074	64.604	43.067	39.12	24.182	33.019	36.1
BRD7	144.34	18.984	103.69	69.132	107.11	43.412	96.87
BRD7P3	25.4	0	24.925	95.338	0	2.8367	0.26403
BRD8	127.16	73.225	127.89	179.39	62.407	133.44	146.43
BRD9	143.3	10.031	110.35	88.323	135.58	32.087	47.436
BRDT	1.7637	6.756	20.779	5.2476	2.7017	3.5268	3.0798
BRE	138.19	29.365	190.16	134.76	108.69	82.629	288.87
BRE-AS1	112.96	0.32526	77.624	58.995	4.6825	125.56	0
BREA2	8.1662	13.051	23.145	21.874	4.8909	7.3321	18.201
BRF1	29.778	0.37124	86.107	48.728	36.169	3.1096	116.73
BRF2	139.24	0	106.36	78.485	51.846	19.93	123.46
BRI3	18.354	60.434	73.566	72.104	76.325	137.79	0
BRI3BP	54.686	0	4.3357	50.793	0	15.248	127.55
BRICD5	21.764	0	93.719	29.332	0	3.4907	51.938
BRIP1	25.441	4.3183	26.889	27.08	6.8172	5.6665	19.742
BRIX1	176.82	29.022	122.22	190.23	31.104	50.503	94.238
BRK1	400.75	164.98	327.14	406.29	215.6	215.41	325.72
BRMS1	113.6	533.11	202.32	267.43	245	154.63	168.28
BRMS1L	0	13.42	52.265	46.652	0	2.4082	94.216
BROX	61.916	15.837	80.924	74.307	52.118	36.78	35.408
BRPF1	2.6857	0	62.259	29.78	14.724	38.21	60.48
BRPF3	37.161	23.332	21.898	44.312	2.6015	20.922	49.46
BRS3	0	0	0	1.9832	0	0	0
BRSK1	0	0	0	0.20066	0	0.34106	0
BRSK2	0	2.7011	0	3.1669	0	0	8.7634
BRWD1	93.675	14.748	76.166	214.47	79.007	41.783	70.376
BRWD1-AS1	0	0	0	0	0	0	0
BRWD1-IT2	0	0	57.579	6.311	0	9.2931	0
BRWD3	25.217	0.78969	9.8992	16.637	3.586	7.3485	13.297
BSCL2	233.83	128.23	161.07	142.23	280.42	115.21	0.72562
BSDC1	129.35	29.051	156.41	160.84	111.93	45.779	136.11
BSG	169.3	255.78	253.09	308.5	305.12	132.22	219.07
BSN	0	14.506	0.019462	4.9882	0	1.4566	0
BSN-AS2	8.7949	6.2548	18.175	12.076	11.522	7.6796	39.967
BSND	0	0	0	0	0	0	0
BSPH1	0	0	0	0	0	0	0
BSPRY	27.367	0	1.2719	56.725	0	1.1357	3.5797
BST1	59.641	54.414	3.8971	0.22197	0	101.95	0
BST2	231.4	373.1	379.7	446.65	627.44	439.27	427.91
BSX	0	0	0	0	0	0	0
BTAF1	82.455	8.6455	97.777	107.52	28.614	12.041	122.77
BTBD1	112.56	31.273	52.994	76.553	21.589	63.102	21.414
BTBD10	133.03	17.579	82.676	175.52	23.028	51.647	30.774
BTBD11	2.8623	0	42.194	17.1	0	0.48258	0
BTBD16	0	0	0.71497	0.4604	0	0	0
BTBD17	0	0	4.1566	4.1856	3.7839	0	0
BTBD18	38.523	0	32.191	24.677	0	0	0
BTBD19	0.24764	40.757	22.577	7.5899	18.634	17.347	0
BTBD2	22.732	29.622	41.703	26.785	15.634	10.142	90.086
BTBD3	2.0636	10.822	36.489	11.297	65.659	6.2113	0
BTBD6	30.328	0	59.278	50.137	10.785	10.945	1.8571
BTBD7	29.264	6.6229	30.772	41.904	9.8264	27.905	1.6503
BTBD8	0	0	25.199	5.1407	0	2.1442	0
BTBD9	33.84	14.807	26.734	34.168	0	7.9407	15.033
BTC	0	0	0	0	0	0	0
BTD	120.77	70.855	43.38	82.644	0	27.475	140.54
BTF3	653.4	272.37	614.34	662.91	478.29	388.39	940
BTF3L4	54.553	15.041	92.637	79.368	13.966	115.97	65.338
BTF3P11	3.499	1.6086	20.538	8.3427	0	2.3475	23.111
BTG1	251.01	26.367	235.39	224.56	21.034	105.58	219.28
BTG2	463.25	115.33	574.46	581.1	670.75	571.49	525.26
BTG3	70.847	15.15	123.74	179.98	35.155	63.841	139.31
BTG4	0	0	0	0	0	0	0
BTK	461.26	0	2.2128	0.57614	0	129.24	0
BTLA	149.98	0	134.38	128.34	0	0.05411	38.142
BTN1A1	0	0	0	0.21069	0	0.25288	0
BTN2A1	70.01	17.776	112.88	159.43	145.42	69.476	275.12
BTN2A2	112.88	29.318	90.646	116.91	52.477	67.687	85.113
BTN2A3P	4.8476	7.6102	7.1303	39.9	1.3654	3.5587	3.439
BTN3A1	97.981	65.929	261.89	313.93	102.34	65.075	374.82
BTN3A2	145.86	76.982	207.18	236.31	114.99	62.351	305.94
BTN3A3	80.273	54.801	428.58	293.73	35.743	126.27	258.18
BTNL2	12.651	0	0	0.67374	0	0	0
BTNL3	0	0	3.736	50.725	0	0	0
BTNL8	0	0	28.86	98.706	0	0	0
BTNL9	17.559	0	33.004	62.679	288.34	0.041963	1.4513
BTRC	29.3	3.6432	32.361	59.477	10.679	8.3373	10.681
BUB1	20.714	0	72.043	64.838	0	0.25509	0
BUB1B	26.755	102.58	6.5902	28.502	0	6.0473	0
BUB3	307.26	80.945	360.08	455.04	112.89	150.71	286.11
BUD13	85.466	23.166	89.177	132.81	0	9.6954	2.9454
BUD31	227.86	97.983	154.81	324.51	113.99	101.2	269.4
BVES	5.5287	2.5866	10.53	7.6628	6.996	12.07	5.8746
BVES-AS1	0	10.664	0	0.52161	0	0	0
BYSL	0	0	77.049	79.394	85.562	29.098	17.94
BZRAP1	5.1654	13.178	23.048	72.752	0	5.9461	78.847
BZRAP1-AS1	35.199	0	44.925	109.56	0	17.091	10.091
BZW1	332.9	187.86	271.84	394.17	105.09	171.35	359.24
BZW2	149.02	185.78	117.88	181.22	117.55	94.359	197.13
C10orf10	0	284.9	71.723	25.543	26.889	0.48066	0
C10orf105	0	0	0	0.21087	0	1.0977	0
C10orf107	0	0	0	0	0	0.61842	0
C10orf11	1.7564	14.121	0	25.478	57.02	76.8	0
C10orf111	2.7942	1.079	9.1704	14.5	0	2.7936	6.056
C10orf113	0	0	0	51.595	14.419	0	0
C10orf114	0	0	0	0.86914	0	0	0
C10orf118	43.122	37.172	32.22	45.398	31.051	15.027	20.332
C10orf12	83.23	2.2521	28.708	57.984	9.6032	26.767	43.647
C10orf120	0	0	3.3553	4.2147	0	8.1998	0
C10orf128	32.516	0	61.876	30.211	123.39	62.189	0
C10orf129	0	0	2.0342	0.84412	0	0	0
C10orf131	0	0	13.052	42.788	0	0.66769	0
C10orf137	29.924	0.80258	89.861	67.86	43.795	18.662	16.575
C10orf2	0	0	6.7809	69.106	0	1.4	0
C10orf25	0	0	40.831	11.872	0	24.861	1.5896
C10orf32	38.008	25.005	111.8	112.11	23.116	74.748	99.407
C10orf32-AS3MT	2.9607	3.2633	5.6124	11.574	11.186	3.2533	6.3771
C10orf35	0	0	97.99	69.681	0	41.109	92.255
C10orf40	0	0	0	6.5453	0	0	0
C10orf53	0	0	0	0	0	0	0
C10orf54	75.13	101.07	192.48	161.89	62.611	273.44	169.44
C10orf55	6.9876	0	0.61655	0.33412	1.4683	4.0613	0.28737
C10orf62	0	0	0	11.879	0	0	0
C10orf67	2.1617	0	2.6823	3.2235	2.3819	1.2451	6.6478
C10orf68	0.80385	0	0.69951	3.0076	0	0	0
C10orf71	0	0	1.3141	37.286	0	0	0
C10orf76	70.127	22.918	41.142	73.472	22.794	59.308	6.486
C10orf82	0	0	0	2.8696	0	0	0
C10orf88	18.119	8.786	69.699	99.183	0	7.106	36.092
C10orf90	0	0	3.7491	5.6443	0	8.4127	0
C10orf91	0	0	13.865	1.6667	0	14.992	0
C10orf95	1.7652	0	8.4202	1.6791	0	0	0
C10orf99	0	0	5.8573	1.2484	0	0	0
C11orf1	302.63	32.649	52.153	69.041	0	41.135	104.31
C11orf16	0	0	0	0	0	0	0
C11orf21	61.76	9.5742	37.122	88.084	2.8613	18.021	86.273
C11orf24	167.16	157.25	85.627	82.123	201.78	60.291	170.93
C11orf30	46.796	2.2486	61.27	65.834	20.879	38.788	4.879
C11orf31	176.58	114.04	214.31	172.68	154.11	111.17	194.44
C11orf34	0	9.4507	0	0.19056	0	0	0
C11orf35	0	0	0.40298	13.526	0	5.6648	0
C11orf40	0	0	5.683	4.904	0	0	0
C11orf42	0	0	0	0.29454	0	0	1.1531
C11orf44	1.6208	0.28639	15.912	3.3864	0	2.0673	3.3159
C11orf45	0	0	8.2819	1.5857	0	13.679	0
C11orf48	111.76	32.632	123.93	147.62	42.02	94.267	112.86
C11orf49	59.958	49.936	92.881	131.82	32.96	75.671	71.872
C11orf52	0	121.86	0	3.6927	0	0.77522	0
C11orf53	36.931	0	0	0.44241	0	0	0
C11orf54	58.192	8.7632	68.049	91.3	0	40.266	3.7021
C11orf57	5.9235	26.462	28.095	46.858	23.705	30.339	41.735
C11orf58	136.51	40.28	138.48	188.73	95.152	64.435	149.52
C11orf63	61.65	5.45	22.101	48.055	24.918	7.3968	55.681
C11orf65	2.112	0	0	0.47543	0	22.101	0
C11orf68	122.09	19.788	66.349	86.093	0	31.456	18.216
C11orf70	6.6952	12.16	11.592	11.739	5.5059	7.1553	5.8042
C11orf71	91.87	17.047	79.473	130.45	47.254	46.442	192.81
C11orf73	113.87	192.54	171.38	194.54	114.6	89.812	166.74
C11orf74	0	40.721	48.129	12.405	11.994	91.493	0
C11orf75	164.12	98.734	97.387	114.17	0	224.02	13.967
C11orf80	120.77	0	27.529	17.804	1.6402	1.5642	1.8077
C11orf82	120.53	95.511	4.0264	38.676	0	0.20319	0
C11orf83	25.842	16.491	60.113	38.422	3.722	22.694	9.6153
C11orf84	0	44.983	11.922	5.3057	0	0	9.0257
C11orf85	0	0	0	4.4176	0	0	0
C11orf86	0	0	0	4.1932	0	0	0
C11orf87	0	0	0	0.63046	0	0	0
C11orf88	0	0	9.191	2.8066	0	0.45646	7.2816
C11orf91	0	0	0	16.433	26.636	6.4136	0
C11orf92	57.669	2.4305	10.29	4.7358	5.035	2.3844	6.4732
C11orf93	4.4658	78.625	0	6.1487	0	0	0
C11orf94	0	0	0	3.4676	0	0	0
C11orf95	0	37.119	6.2883	9.4589	1.0734	0	0
C11orf96	0	11.5	9.4568	13.887	0	0	0
C12orf10	295.63	100.72	155.46	208.33	91.262	87.72	135.52
C12orf23	145.29	60.227	155.18	149.74	37.645	29.968	94.109
C12orf29	7.8233	19.072	39.17	77.369	6.4612	11.457	24.615
C12orf36	1.8457	0	13.974	23.036	0	0.25929	0.7885
C12orf39	0	0	0	1.4461	0	0	0
C12orf4	54.329	5.6842	40.692	69.506	16.786	36.564	0
C12orf40	0	0	0.63837	9.1976	0	0	0
C12orf42	17.972	0	57.176	19.217	0	3.4408	0
C12orf43	151.02	40.779	116.03	93.36	61.244	30.713	6.1243
C12orf44	15.524	45.209	197.02	233.24	116.63	101.19	543.1
C12orf45	233.06	0	188.54	106.3	40.668	107.12	162.81
C12orf49	11.747	12.038	66.258	51.417	0	6.207	0
C12orf5	35.455	1.0084	27.337	35.158	16.959	22.801	21.1
C12orf50	0	0	0	2.341	0	0	0
C12orf52	122.3	29.056	24.449	132.89	132.93	73.626	12.164
C12orf54	0	0	0	0	0	0	0
C12orf56	0	0	0	0	0	0	0
C12orf57	259.23	394.5	463.71	549.24	248.18	385	478
C12orf60	0	0	27.509	17.605	0	6.2827	0
C12orf61	0	0	43.833	8.4136	0	7.9952	14.055
C12orf65	92.05	11.702	245.96	132.91	78.187	28.722	108.34
C12orf66	38.199	16.766	49.44	70.326	63.867	12.915	10.417
C12orf68	0	0	0	0.95259	0	0	0
C12orf69	0	0	0.54885	20.014	0	5.6012	0
C12orf70	0	0	0	0.74625	0	0	0
C12orf71	11.659	0	3.7204	3.0955	0	0	17.632
C12orf73	28.507	7.5539	17.348	29.101	0	68.728	9.9594
C12orf74	36.251	0	5.6705	0.078487	0	0	0
C12orf75	48.591	66.339	191.8	195.59	4.7398	0.72772	199.76
C12orf76	9.3478	7.7393	81.215	73.573	21.313	50.949	0.69152
C12orf77	6.2528	7.1044	17.461	11.269	2.4754	5.8747	9.3614
C13orf35	0	0	0	6.1606	0	0	0
C13orf45	0	0.93692	0	0.27487	0	0.1292	0
C14orf1	89.883	32.775	187.65	141.72	33.57	31.556	175.89
C14orf101	10.476	0	41.592	64.892	0.87741	30.141	27.594
C14orf105	7.6961	4.0046	11.908	11.003	6.5672	9.5546	11.568
C14orf119	80.371	28.806	103.76	129.48	89.107	49.39	168.27
C14orf132	2.4202	15.499	16.885	5.6606	22.61	0.76308	2.8813
C14orf142	68.702	64.419	89.237	115.62	5.6021	111.52	238.02
C14orf159	105.39	33.642	148.85	149.94	134.23	55.692	128
C14orf166	305.67	168.36	275.46	296.58	189.77	148.17	170.04
C14orf166B	0	0	1.339	1.4773	0	0.22197	0
C14orf169	4.6879	6.0085	45.082	31.927	0	24.926	77.537
C14orf177	1.0388	0	0	0.45723	0	0	0
C14orf178	14.009	2.0109	26.219	27.47	11.798	12.475	33.165
C14orf180	0	0	0	7.5197	0	0	0
C14orf182	98.896	0.68582	9.9073	21.98	0	13.514	7.0075
C14orf183	4.3471	0	8.0089	2.2982	0	0	0
C14orf2	396.25	140.18	243.78	269.49	110.45	174.38	291.16
C14orf23	34.813	19.733	36.691	47.569	27.991	18.079	39.44
C14orf28	16.56	12.764	49.549	14.213	0	7.3675	4.2291
C14orf37	0.44067	61.015	8.3633	3.4106	148.06	5.9443	0
C14orf39	0	0	0.41417	1.621	0	4.7774	0
C14orf64	5.6714	20.845	54.165	41.038	0	3.6363	159.83
C14orf79	0	0	72.278	15.377	2.0382	6.1819	0
C14orf80	17.259	0	48.591	68.894	0	24.519	0
C14orf93	55.615	30.918	59.247	72.574	0	46.11	104.32
C15orf26	0	0	0	0.068792	0	0	0
C15orf27	0	0	5.6084	2.4978	0	0	0
C15orf32	0	0	13.917	2.3793	0	0	0
C15orf37	2.0646	0	25.92	16.785	0.35578	1.6926	2.0058
C15orf38	3.9254	38.505	4.655	5.5122	13.113	45.433	3.9115
C15orf38-AP3S2	0.43896	9.3397	0.12739	3.0573	0	13.252	1.6793
C15orf39	31.451	25.325	49.083	38.472	10.522	37.636	120.05
C15orf40	176.66	25.364	161.45	98.578	23.037	36.591	91.397
C15orf41	70.422	0	34.88	30.114	16.285	2.5188	19.673
C15orf43	1.534	0	15.581	1.5949	0	0	0
C15orf48	33.567	0	0.74798	29.529	0	680.46	49.76
C15orf52	5.7727	0.34888	27.402	27.482	47.4	12.181	5.7902
C15orf53	0	0	51.652	19.947	0	0	0
C15orf54	0.35304	0	7.7885	8.5737	0	0.13753	2.177
C15orf55	0	0	0	4.6456	0	0	0
C15orf56	0	0	0	0.67472	0	0	0
C15orf57	223.98	190.03	202.3	180.31	67.353	89.369	10.845
C15orf59	0	0	0.63915	0	0	0	0
C15orf60	0	0	0	0.51393	0	0	0
C15orf61	0	38.562	32.112	53.295	44.844	40.843	115.62
C15orf62	0	0	35.188	22.714	0	1.4952	0
C16orf11	0	0	0	0	0	0	0
C16orf13	140.01	244.72	236.58	225.84	159.96	717.21	70.73
C16orf3	2.0127	3.8393	3.6618	1.1006	0	0	0
C16orf45	78.37	68.572	53.765	138.82	80.296	78.021	0
C16orf46	68.824	0.4879	12.62	18.684	0	1.9446	0
C16orf52	13.201	0	14.8	12.541	0	14.497	0
C16orf54	170.51	6.6495	336.74	258.42	8.3211	65.627	543.78
C16orf55	9.4884	0.59918	53.507	79.429	39.112	2.4205	3.6545
C16orf58	77.533	76.959	109.52	100.53	68.624	44.102	35.51
C16orf59	0.17906	0	7.9078	10.783	2.1408	0	0
C16orf62	121.78	51.307	45.035	99.323	16.725	57.517	87.457
C16orf70	7.755	25.298	42.402	98.205	3.9949	70.785	0
C16orf71	0	0	2.081	3.4331	0	3.982	0
C16orf72	32.815	0	64.134	69.978	13.726	32.29	61.754
C16orf74	106.56	0	7.6104	30.679	7.6403	19.565	80.473
C16orf78	0	0	5.1046	0	0	0	0
C16orf80	177.6	62.67	253.9	255.05	158.06	60.341	346.35
C16orf82	0	0	17.742	0.98234	0	0	0
C16orf86	70.851	0	0	25.53	0	42.358	0
C16orf87	68.164	2.3087	68.964	147.08	0	5.3352	40.89
C16orf88	36.916	21.511	20.484	52.475	103.17	22.926	91.865
C16orf89	4.5484	12.684	8.859	8.467	0	7.6562	27.778
C16orf90	0	0	4.8257	3.0144	0	0	0
C16orf91	82.339	26.335	215.28	192.2	158.23	75.978	118.26
C16orf92	0	0	0	0	0	0	0
C16orf93	17.652	0	0	8.0345	0	12.012	0
C16orf95	2.7507	27.304	1.1895	26.615	0	9.2874	133.69
C16orf96	0	0	0	0.39753	0	0	0
C16orf97	0	0	0	0.36579	0	0	0
[truncated: 21,687 more rows]
