# Supplementary material for: Simultaneous enumeration of cancer and immune cell types from bulk tumor gene expression data
Source: eLife journal article supplement (doi:10.7554/elife.26476), 2017-11-13
Supplement: supp [file elife-26476-supp-v1.zip › elife_poa_e26476_Supplementary_File_3.xlsx]

## Sheet: SupplFile 3A
Supplementary File 3A
Proportion of live cells measured by flow cytometry for the lymph nodes of patients with metastatic melanoma.
donor ID	B cells	CD4 T cells	CD8 T cells	NK cells	Cancer cells	Other cells
LAU125	18.12	0.82	0.35	0.5	68.03	12.18
LAU355	32.48	23.15	5.82	0.17	0.06	38.32
LAU1255	5.79	2.76	3.76	0.17	37.56	49.97
LAU1314	46.67	18.15	4.54	0.25	0.07	30.31

## Sheet: SupplFile 3B
Supplementary File 3B
Proportion of cells measured by flow cytometry from PBMC of healthy donors. Proportions computed starting from the raw .fcs files from the "Innate panel" and from the "Treg panel" from Zimmermann, M. T. et al. (2016) PLoS ONE vol. 11, accessed through ImmPort (www.immport.org) SDY67 accession number.
donor ID	B cells	CD4 T cells	CD8 T cells	NK cells	Monocytes	Other cells
SUB113460	5.79	31.81	26.13	10.18	21.29	4.8
SUB113471	5.31	24.48	37.72	12.2	15.56	4.74
SUB113493	2.46	21.33	22.93	22.9	20.84	9.54
SUB113518	3.36	38.93	38.79	10.83	5.18	2.91
SUB113519	2.93	30.76	44.6	5.73	10.37	5.61
SUB113536	2.33	38.05	23.04	19.06	10.72	6.8
SUB113541	3	35.7	39.53	5.9	12.07	3.8
SUB113543	7.14	18.6	17.91	16.76	30.31	9.28
SUB113547	5.31	21.59	44.39	15.78	9.85	3.08
SUB113563	3.28	45.4	25.37	5.63	16.57	3.75
SUB113569	7.13	49.06	22.17	5.29	12.34	4.02
SUB113596	3.63	22.81	38.94	16.02	15.42	3.19

## Sheet: SupplFile 3C
Supplementary File 3C
Proportion of cells measured by flow cytometry from PBMC of healthy donors, from the study of Hoek, K. L. et al (2015) PLoS ONE vol. 10.
donor ID	B cells	Monocytes	NK cells	T cells	Other cells
HD30	4.7	16.9	19.4	56.1	2.9
HD31	9.8	19.6	4.9	63.9	1.8

## Sheet: SupplFile 3D
Supplementary File 3D
Proportion of cells measured by complete blood counts from blood of various donors, obtained in the study of Linsley, P. S. et al (2014) PLoS ONE vol. 9. Neutrophils corresponds to the Neutrophils + Granulocytes measured values.
donor ID	Lymphocytes	Monocytes	Neutrophils	Other cells
31	30.57	6.69	59.14	3.6
43	12	8.71	78.17	1.12
50	19.64	8.93	69.64	1.79
53	27.66	10.64	59.57	2.13
55	38	5.6	54.5	1.9

## Sheet: SupplFile 3E
Supplementary File 3E
Site of resection and proportion of cells measured by single-cell RNA-seq for patients with melanoma, from the study of Tirosh, I. et al (2016) Science vol. 352.
donor ID	Site of resection	B cells	CAFs	CD4 T cells	CD8 T cells	Endothelial	Macrophages	NK cells	T helper	Treg	Cancer cells	Other cells
Mel53	Subcutaneous back lesion	0	2.99	29.85	17.16	7.46	8.96	7.46	23.13	6.72	11.94	14.18
Mel58	Subcutaneous leg lesion	1.68	0	18.49	60.5	0	1.68	3.36	15.13	3.36	0	14.29
Mel59	Femoral lymph node	0	10	0	0	0	1.43	0	0	0	77.14	11.43
Mel60	Spleen	45.02	0	15.17	15.17	0	1.9	4.74	7.11	8.06	4.27	13.74
Mel65	Paraspinal intramuscular	9.43	0	15.09	43.4	0	1.89	0	11.32	3.77	7.55	22.64
Mel67	Axillary lymph node	22.89	0	34.93	28.92	0	0	1.2	33.73	1.2	0	12.05
Mel71	Transverse colon	0	0	6.9	17.24	0	2.3	0	6.9	0	62.07	11.49
Mel72	External iliac lymph node	26.12	0	37.31	14.93	0	0	0.75	32.09	5.22	0	20.9
Mel74	Terminal Ileum	10.08	0	10.85	66.67	0	3.88	0.78	6.2	4.65	0	7.75
Mel75	Subcutaneous leg lesion	0	0	4.54	93.64	0	0.3	0	3.33	1.21	0.91	0.61
Mel78	Small bowel	0.77	0.77	0	0	0	0	0	0	0	92.31	6.15
Mel79	Axillary lymph node	9.02	0.12	5.32	25.2	0.23	0	0.12	4.51	0.81	54.1	5.9
Mel80	Axillary lymph node	11.81	4.82	21.93	13.49	6.51	0	0.72	17.59	4.34	30.12	10.6
Mel81	Axillary lymph node	1.6	0	3.74	9.63	1.07	0	0	2.67	1.07	71.12	12.83
Mel82	Axillary lymph node	1.33	6.67	12	8	0	5.33	2.67	5.33	6.67	42.67	21.33
Mel84	Acral primary	17.24	0.69	16.55	14.48	0.69	14.48	4.83	11.72	4.83	9.66	21.38
Mel88	Cutanoues met	5.08	0.63	11.42	11.75	0	12.06	2.86	9.52	1.9	37.14	19.05
Mel89	Axillary lymph node	24.09	0	8.18	29.55	0.23	5.91	0.23	4.77	3.41	22.27	9.55
Mel94	Iliac lymph node	20.25	4.75	16.77	7.91	6.01	0.63	0.32	14.24	2.53	3.16	40.19
