# Supplementary figures and images for: Simultaneous enumeration of cancer and immune cell types from bulk tumor gene expression data
Source: eLife journal article supplement (doi:10.7554/elife.26476), 2017-11-13

Figure 5 - figure supplement 4

**A**

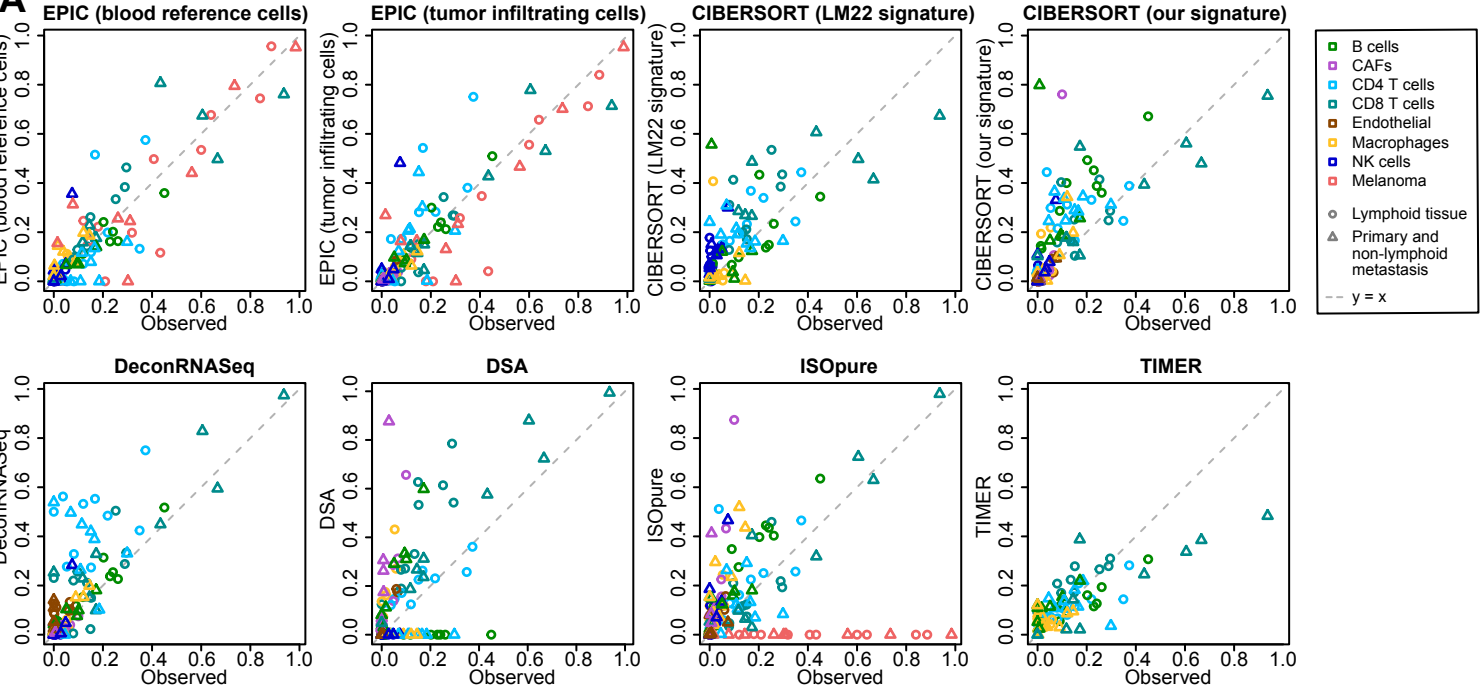

**B**

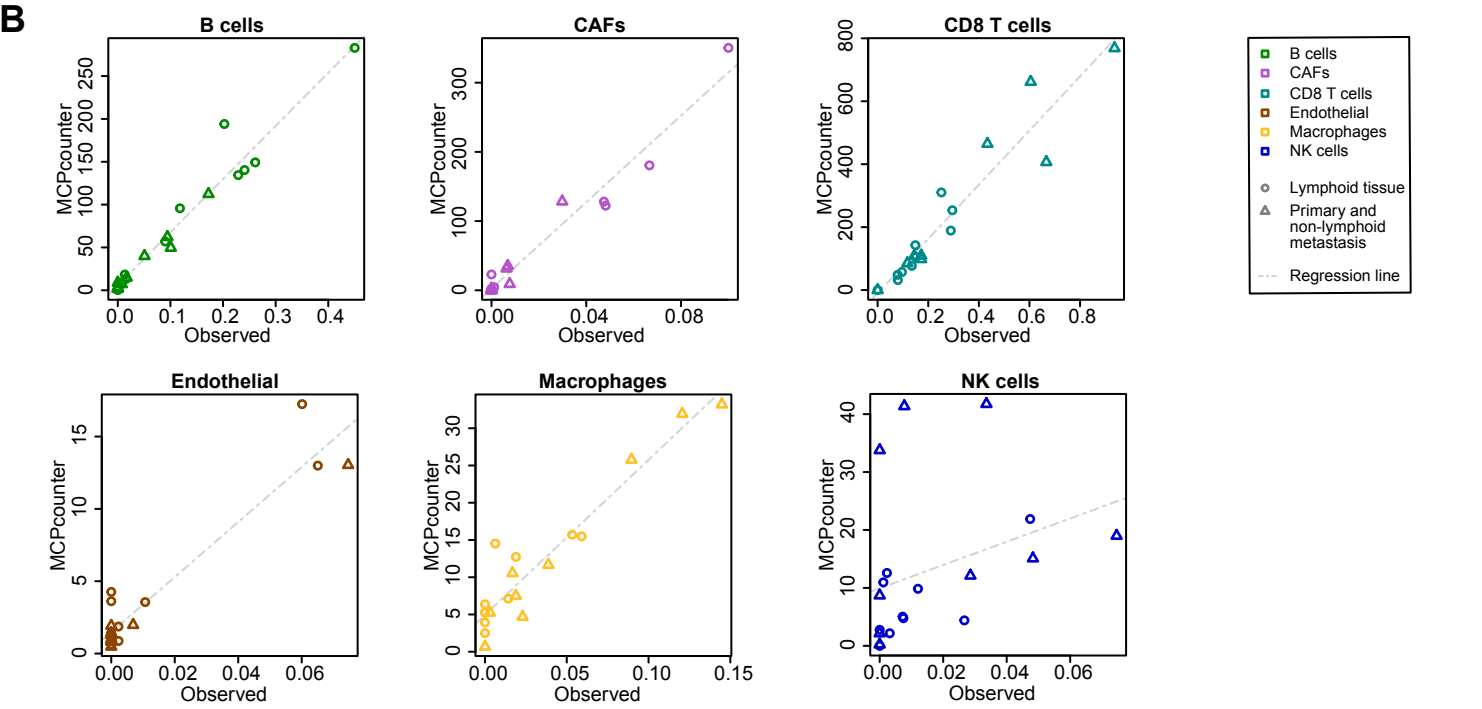

Supplement: supp [file elife-26476-supp-v1.zip]

# Figure 2 - figure supplement 1

## A

### Pearson correlation

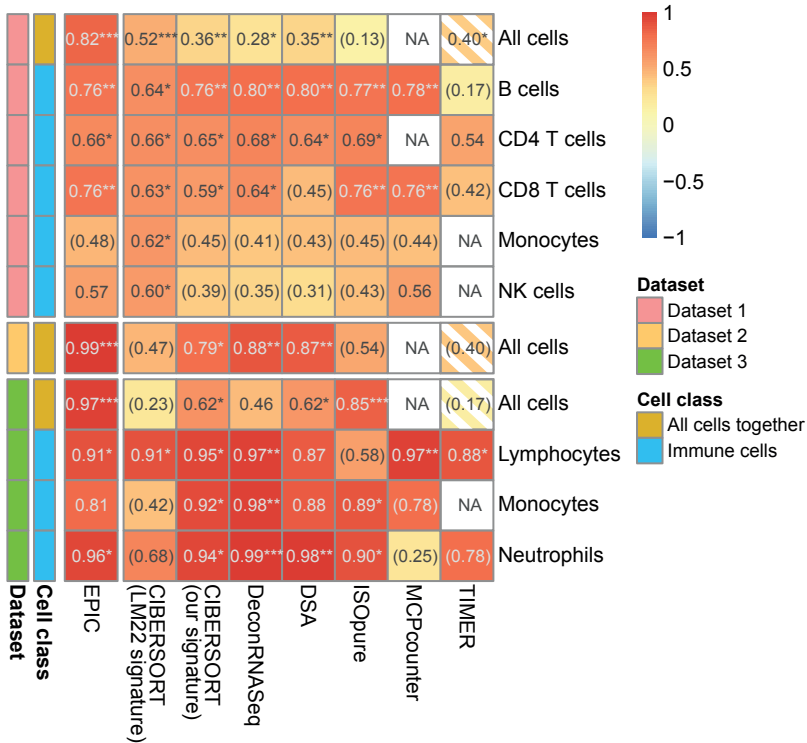

## B

### Root mean squared error

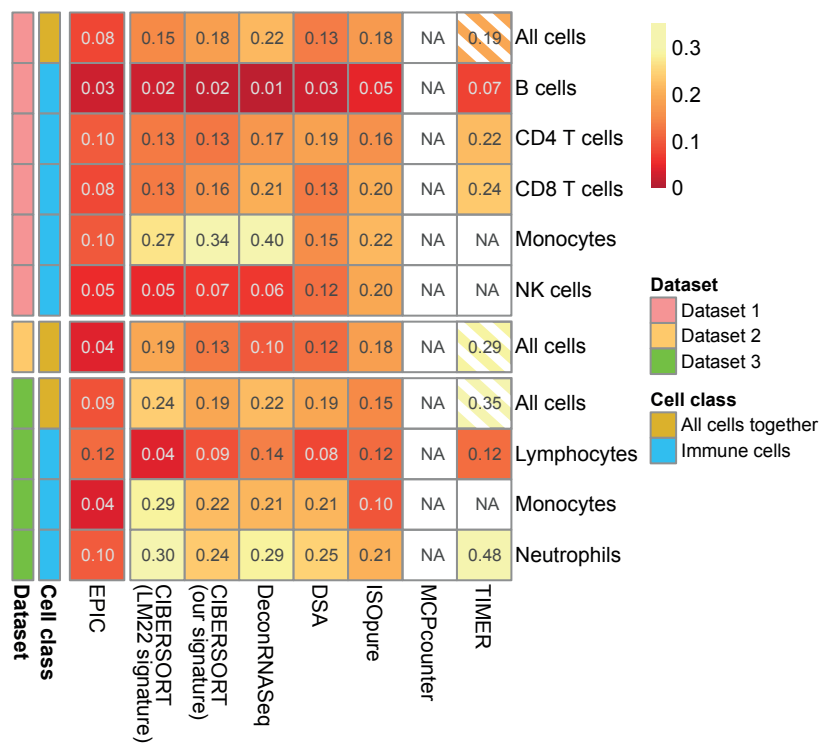

Supplement: supp [file elife-26476-supp-v1.zip]

### Figure 5 - figure supplement 1

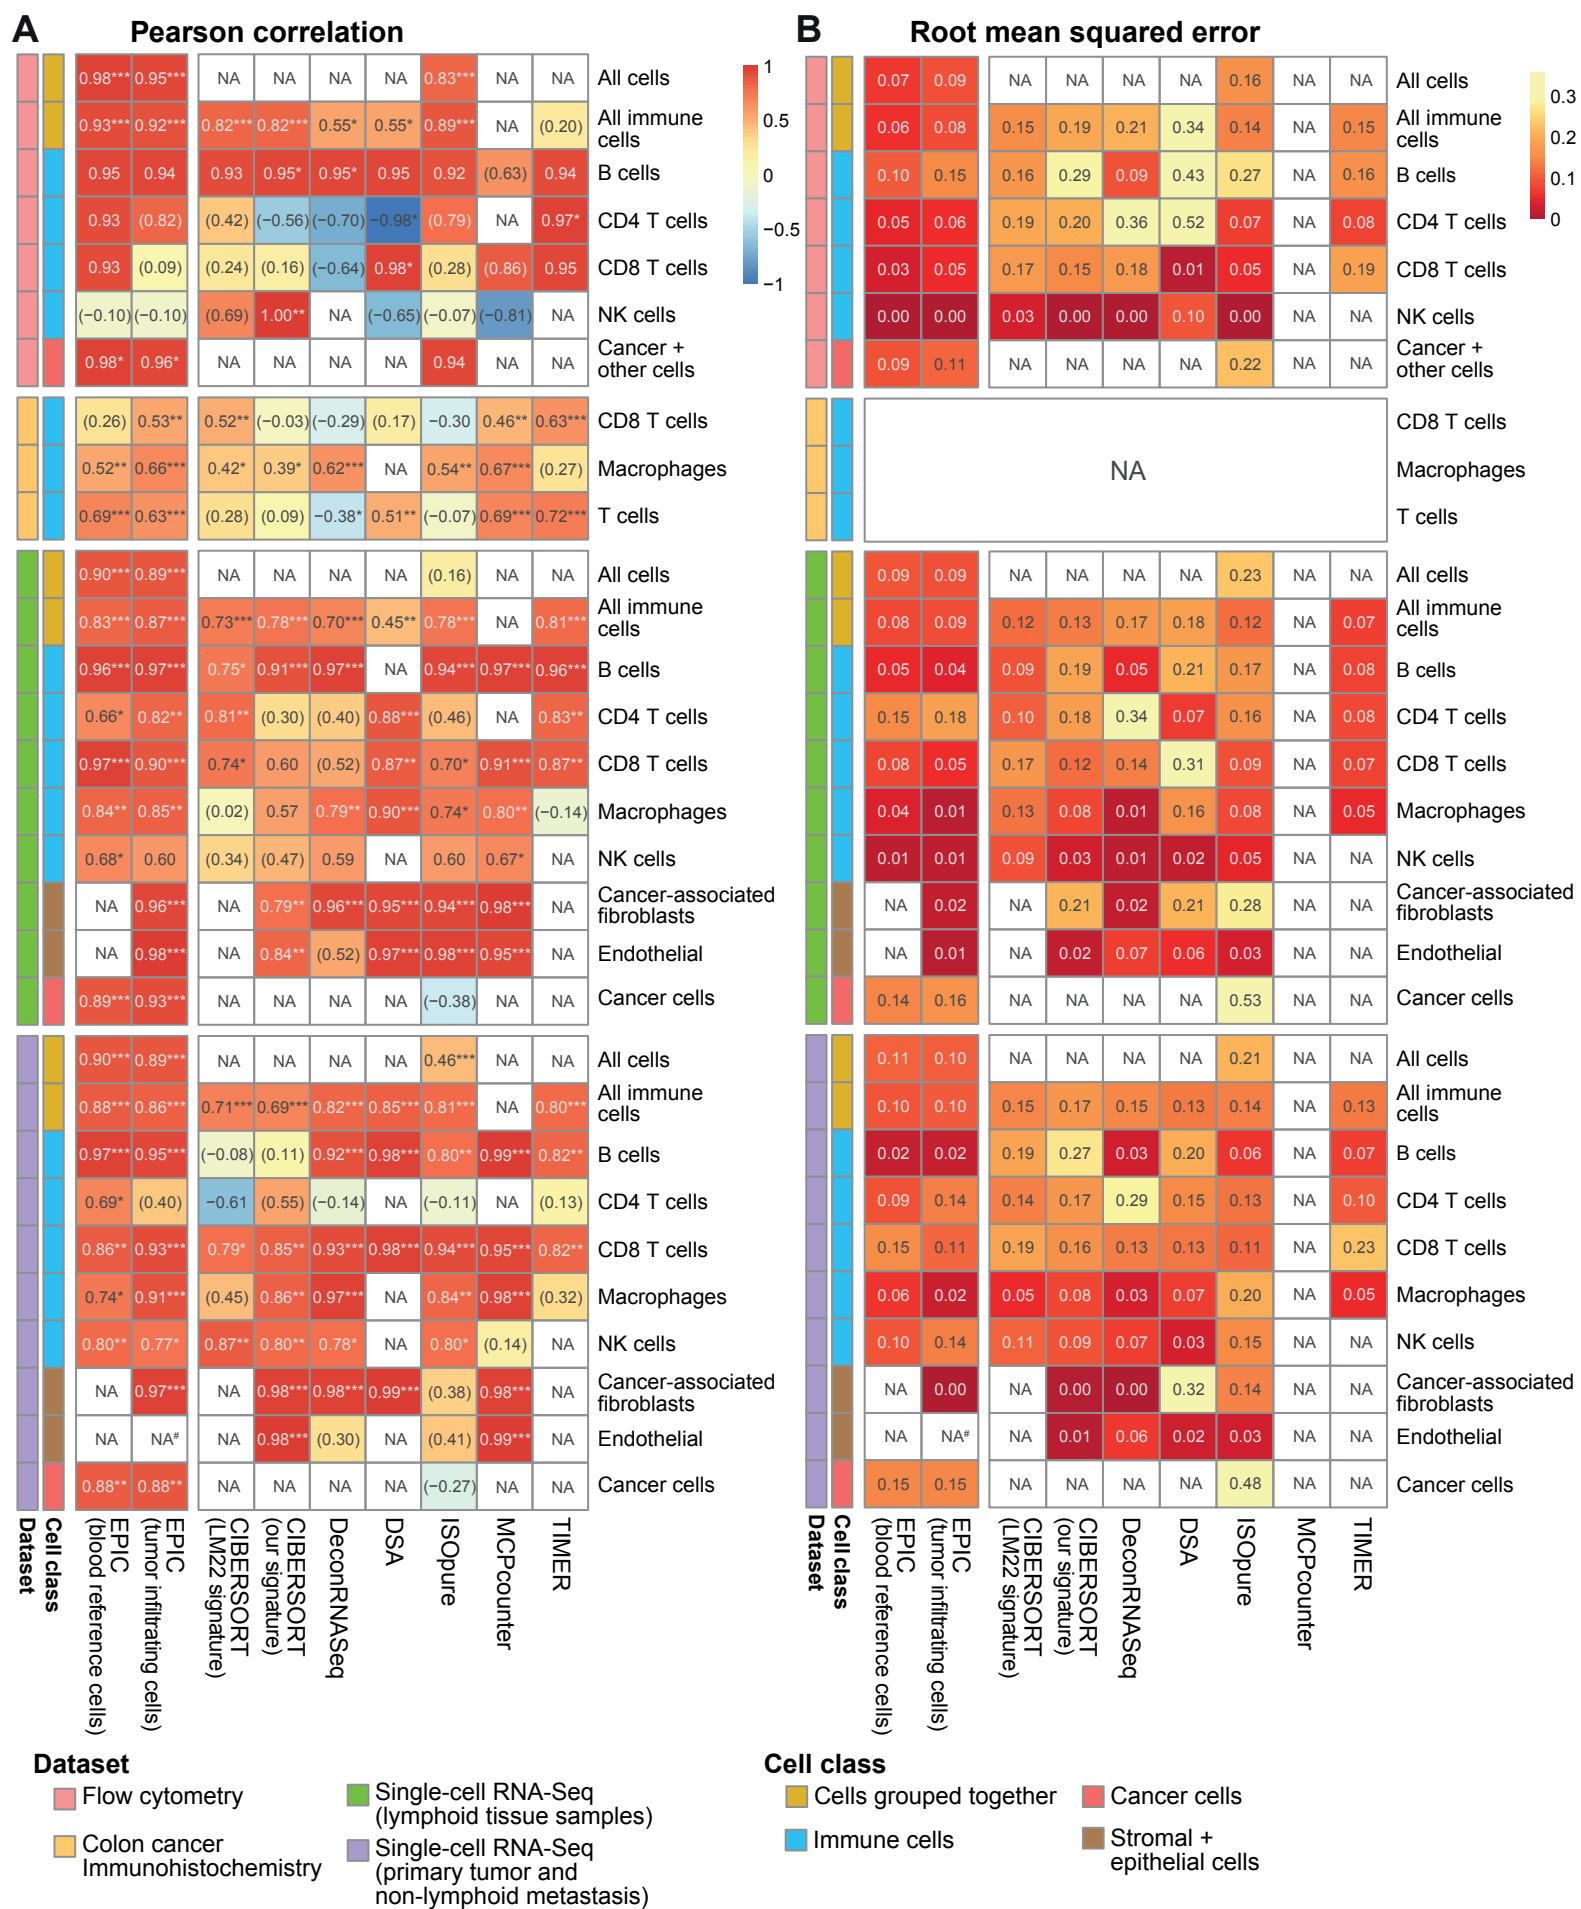

Supplement: supp [file elife-26476-supp-v1.zip › elife_poa_e26476_Figure_5_figure_supplement_1.pdf]

**Figure 1 - figure supplement 2**

**A**

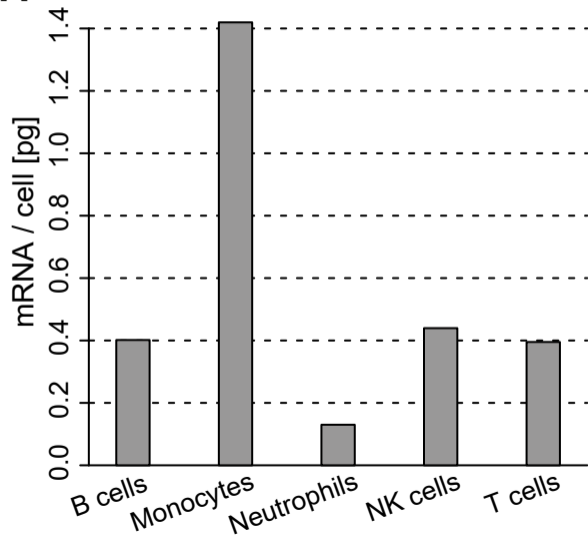

**B**

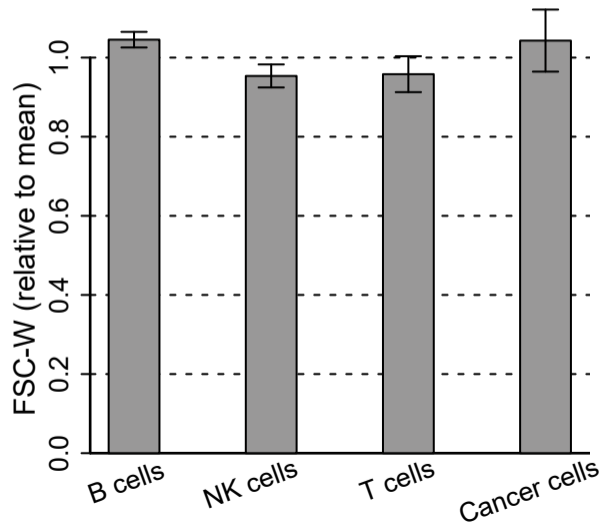

Supplement: supp [file elife-26476-supp-v1.zip › elife_poa_e26476_Figure_1_figure_supplement_2.pdf]

# Figure 2 - figure supplement 2

Pearson correlation

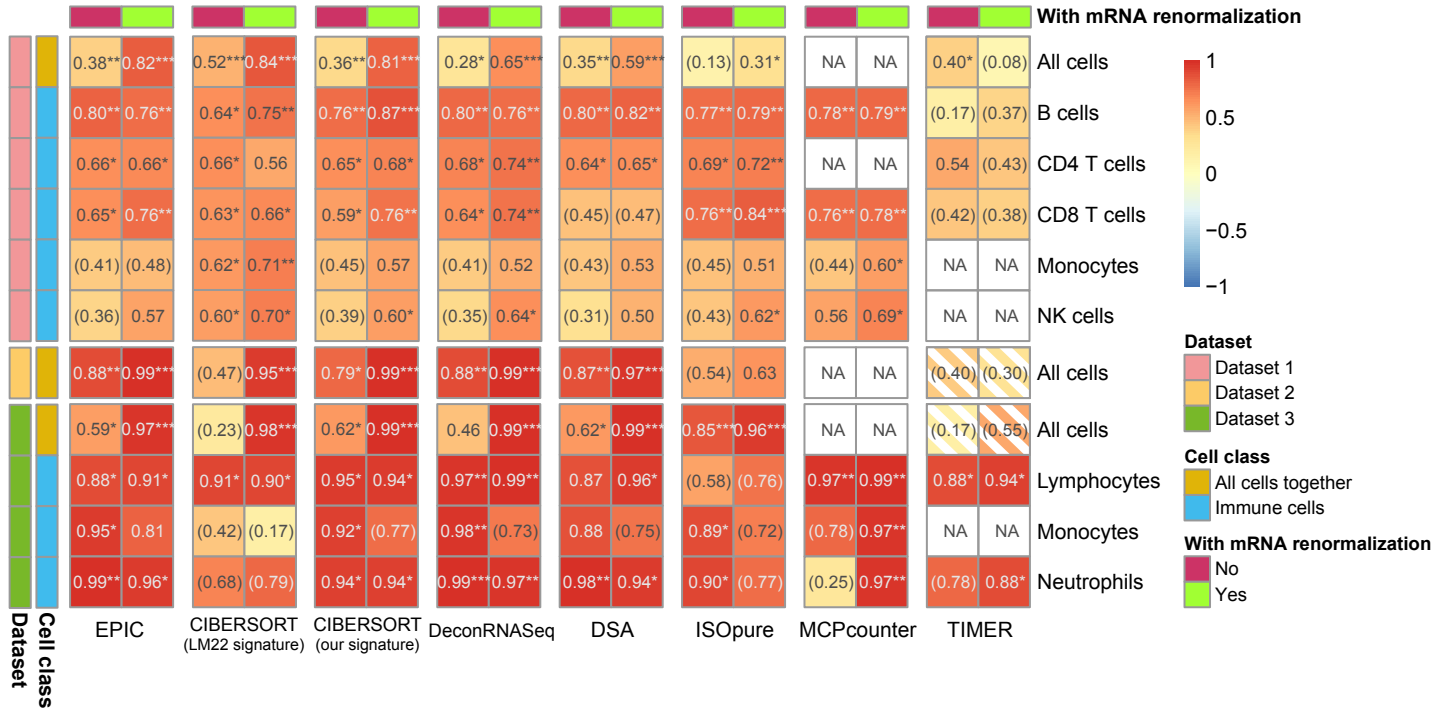

Supplement: supp [file elife-26476-supp-v1.zip › elife_poa_e26476_Figure_2_figure_supplement_2.pdf]

# Figure 3 - figure supplement 1

## Bulk tumor sample

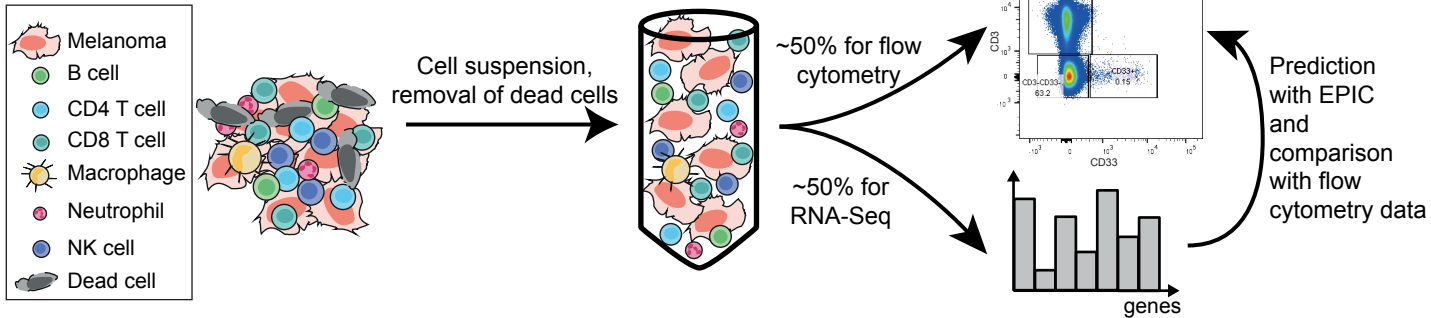

Supplement: supp [file elife-26476-supp-v1.zip › elife_poa_e26476_Figure_3_figure_supplement_1.pdf]

# Figure 2 - figure supplement 3

## Pearson correlation

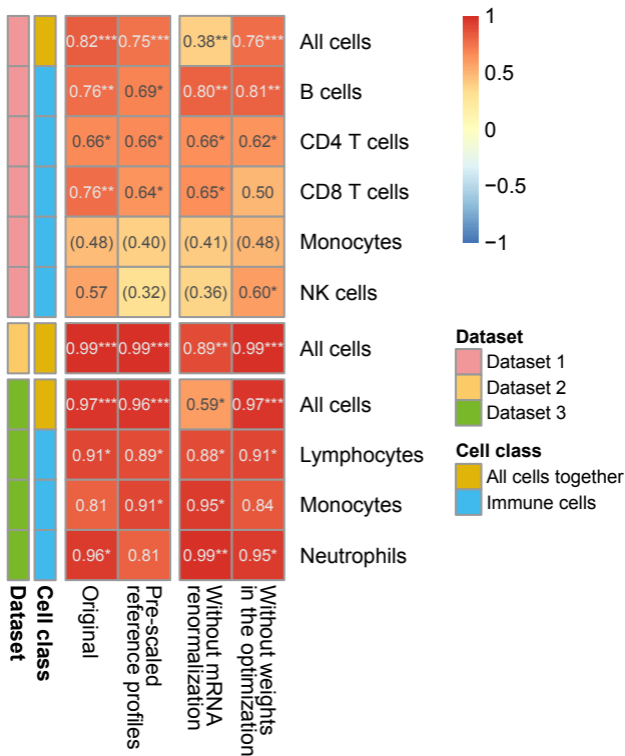

Supplement: supp [file elife-26476-supp-v1.zip › elife_poa_e26476_Figure_2_figure_supplement_3.pdf]

Figure 5 - figure supplement 3

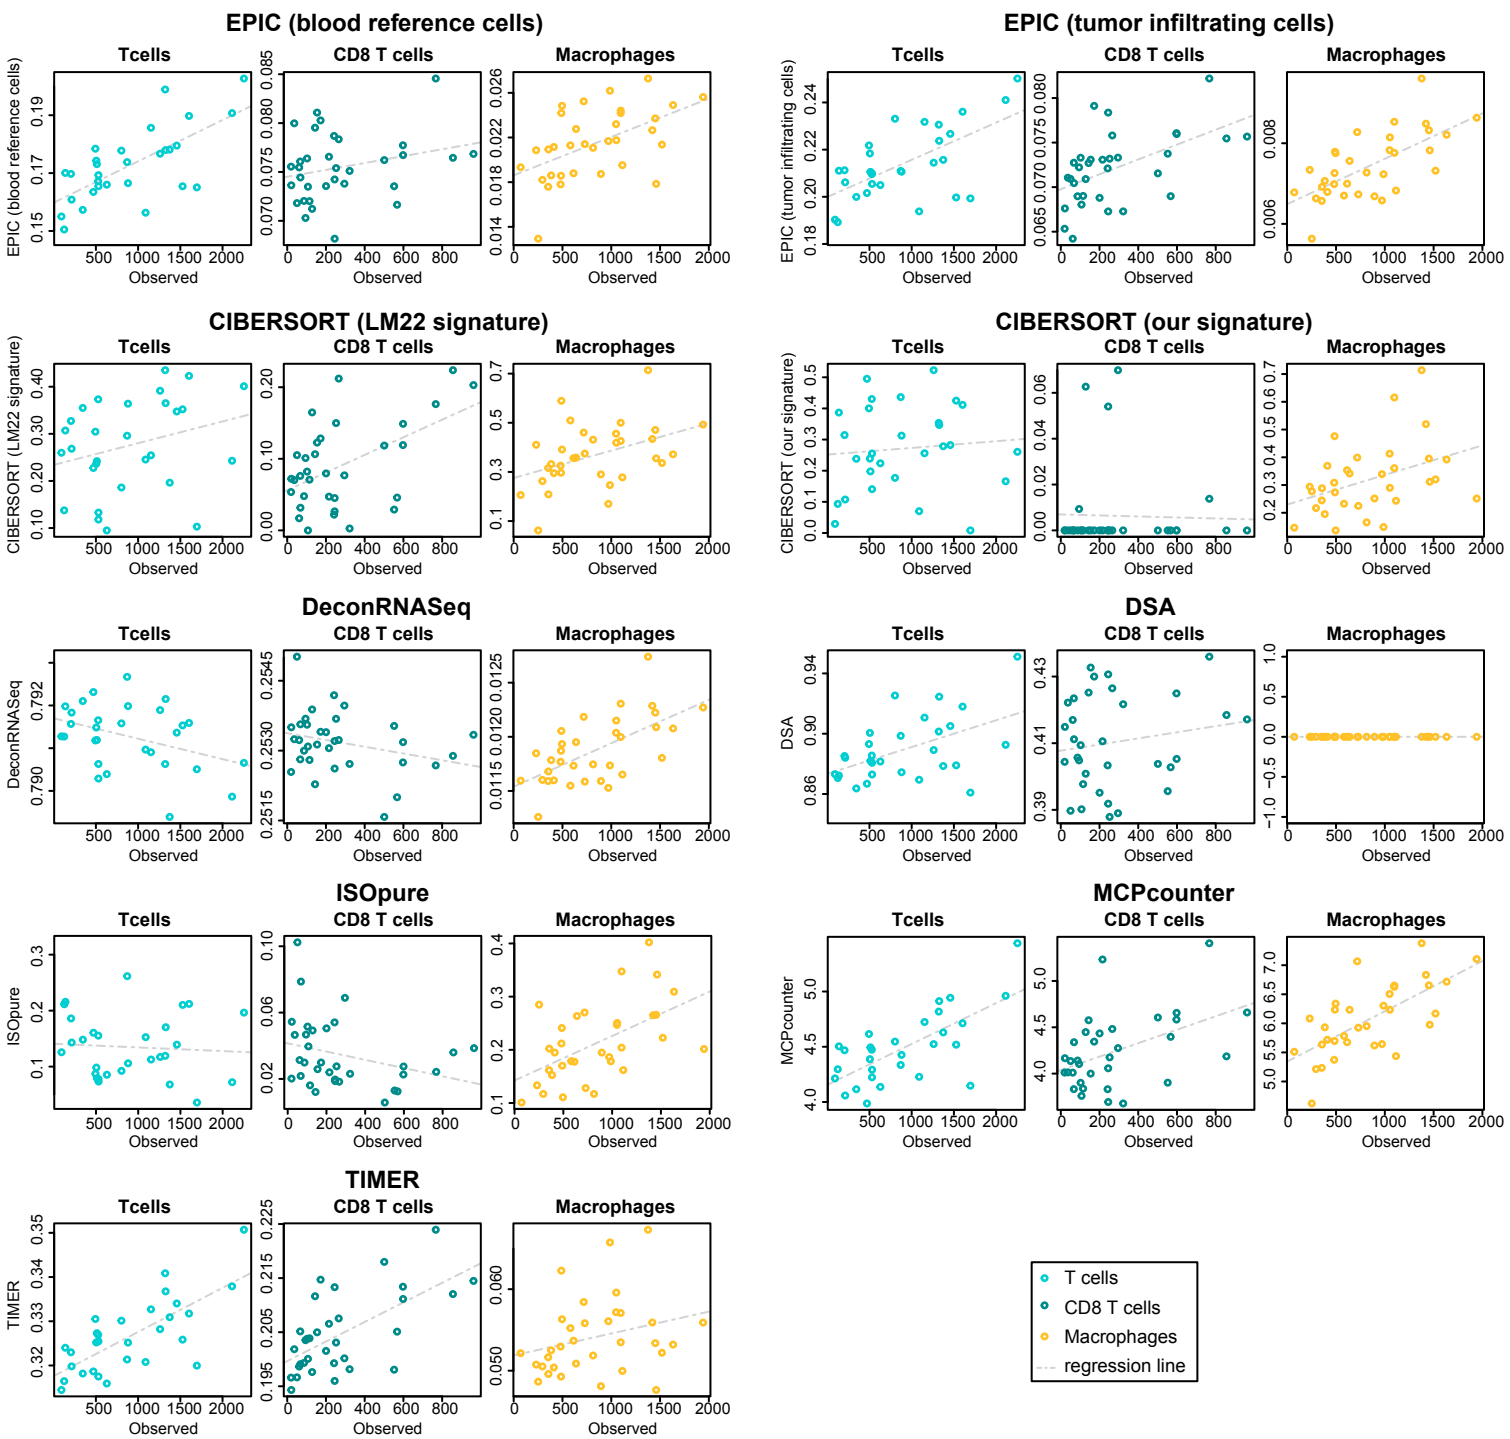

Supplement: supp [file elife-26476-supp-v1.zip › elife_poa_e26476_Figure_5_figure_supplement_3.pdf]

**Figure 1 - figure supplement 1**

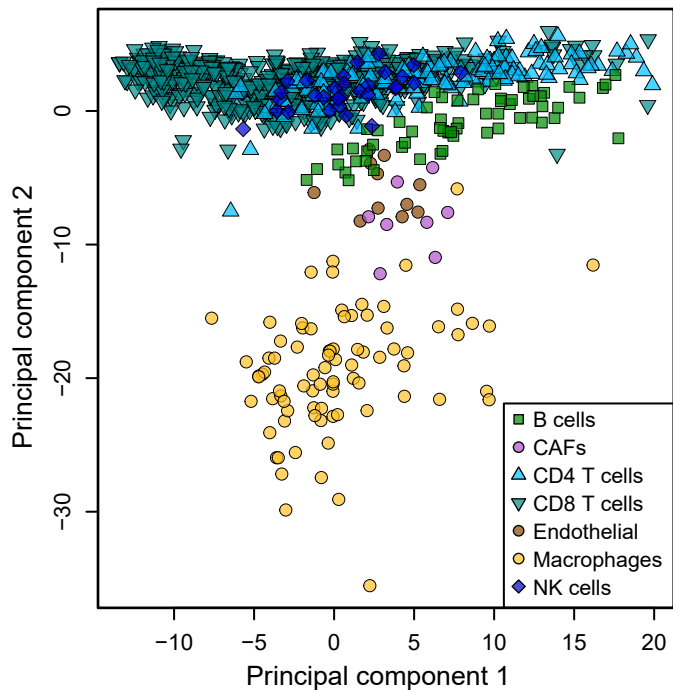

Supplement: supp [file elife-26476-supp-v1.zip › elife_poa_e26476_Figure_1_figure_supplement_1.pdf]

# Figure 5 - figure supplement 6

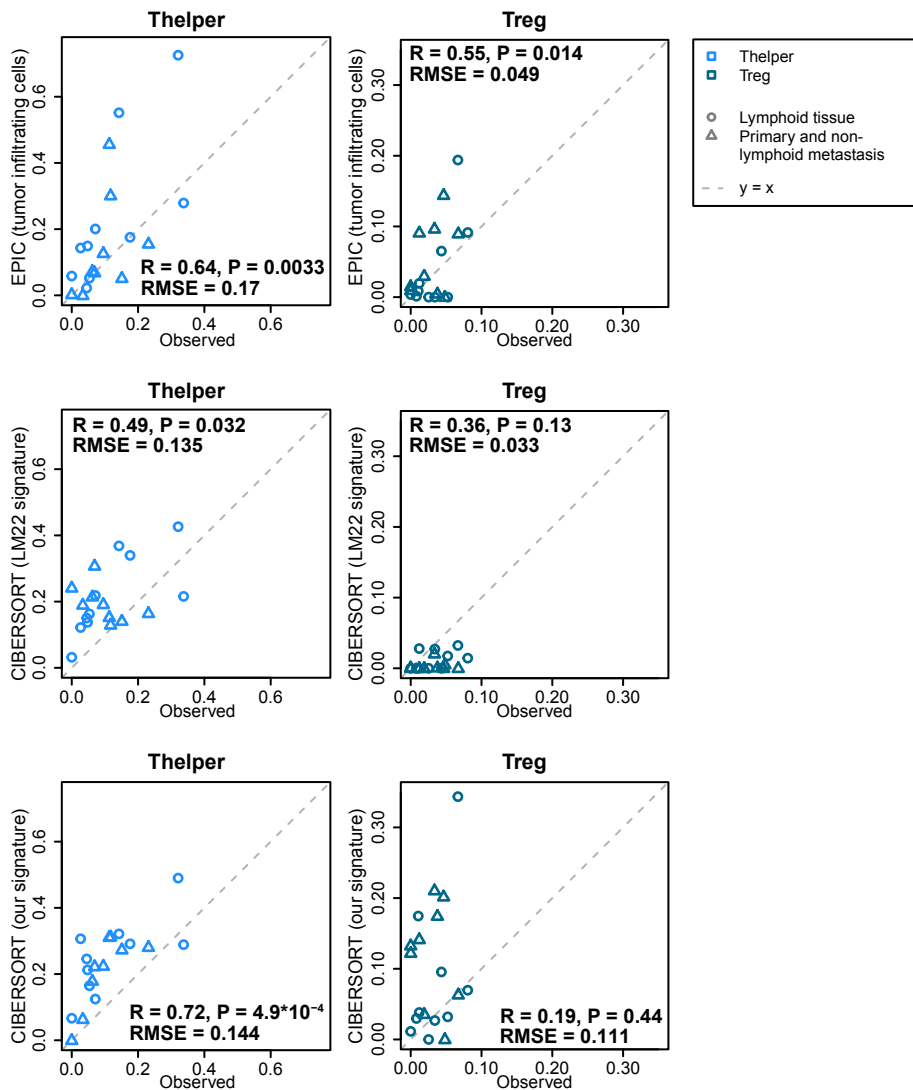

Supplement: supp [file elife-26476-supp-v1.zip › elife_poa_e26476_Figure_5_figure_supplement_6.pdf]

# Figure 4 - figure supplement 1

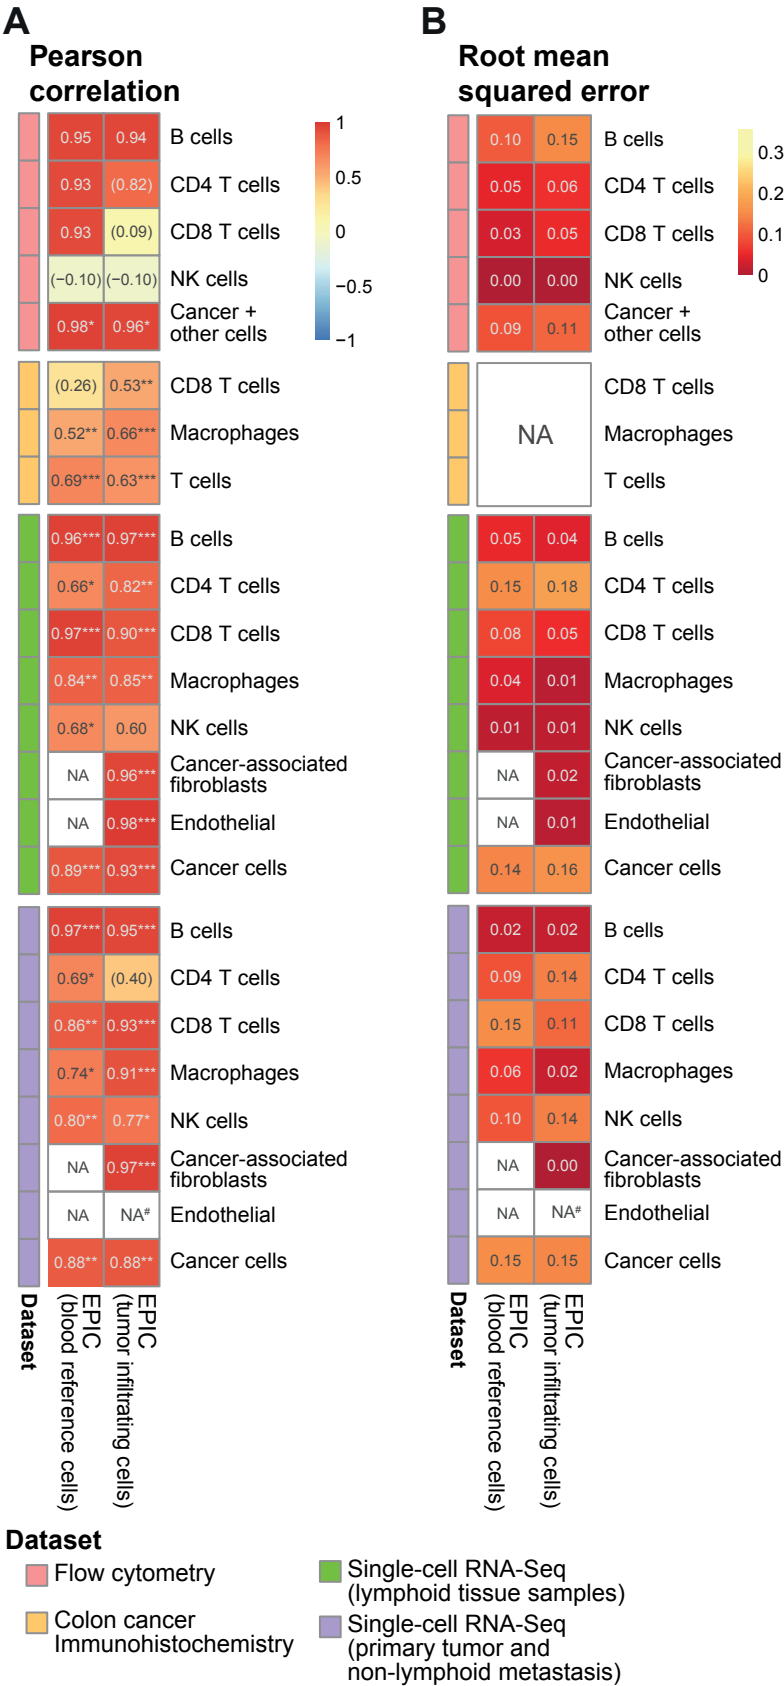

Supplement: supp [file elife-26476-supp-v1.zip › elife_poa_e26476_Figure_4_figure_supplement_1.pdf]

Figure 5 - figure supplement 2

A

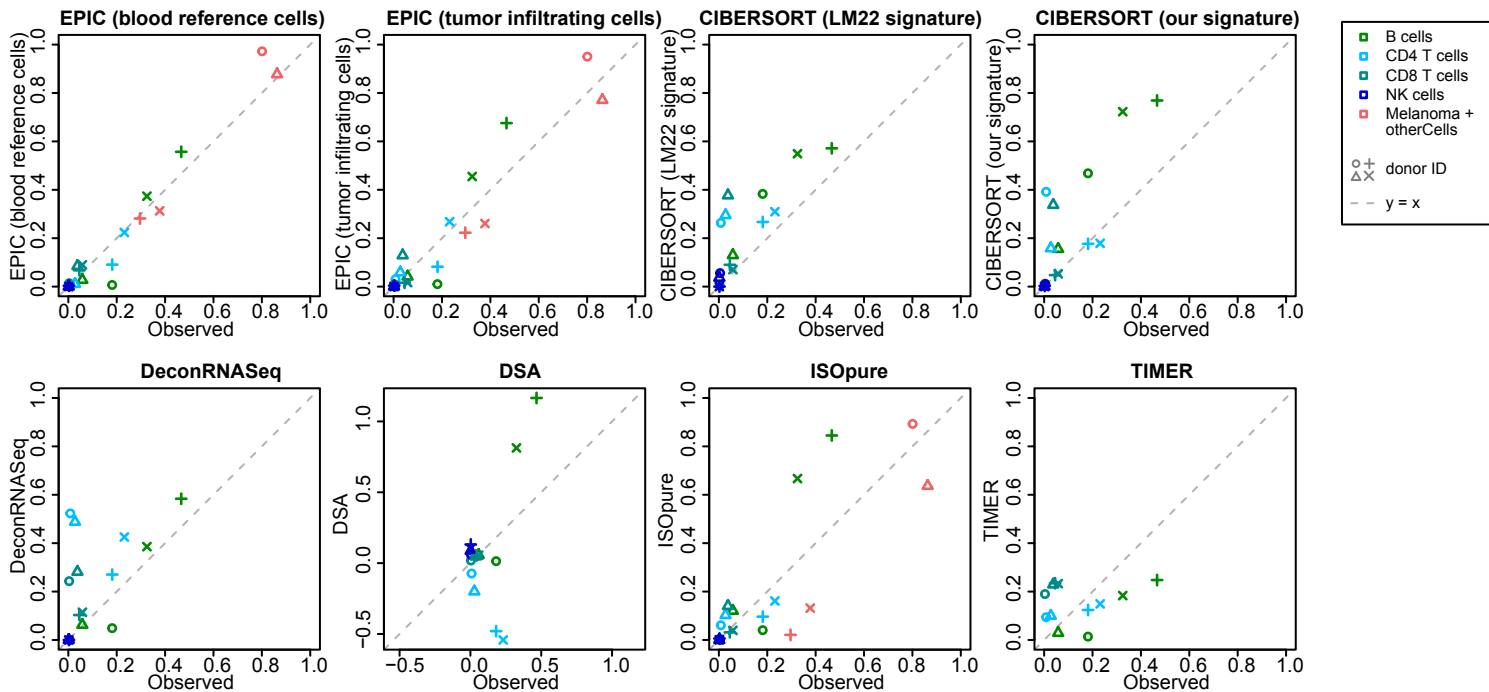

B

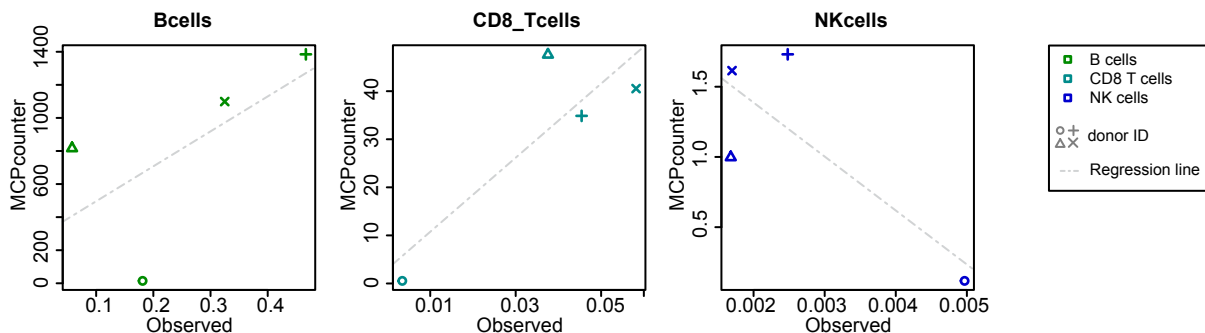

Supplement: supp [file elife-26476-supp-v1.zip › elife_poa_e26476_Figure_5_figure_supplement_2.pdf]

# Figure 5 - figure supplement 5

A

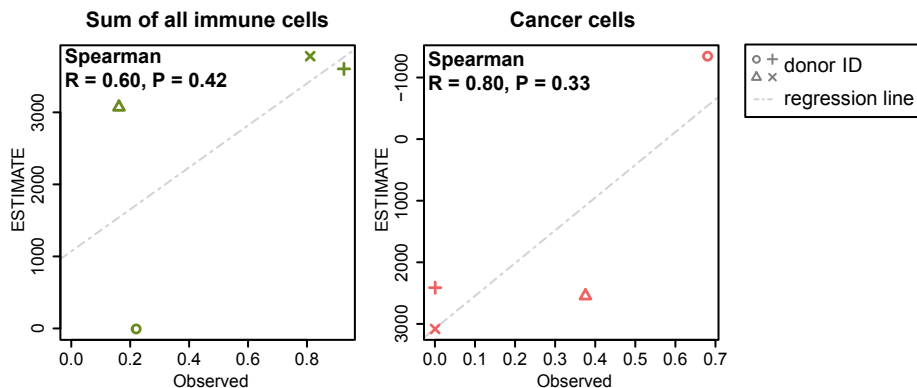

B

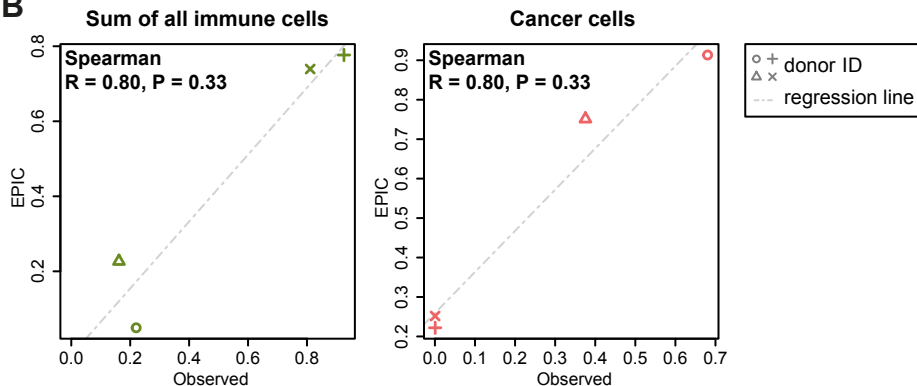

Supplement: supp [file elife-26476-supp-v1.zip › elife_poa_e26476_Figure_5_figure_supplement_5.pdf]

# Figure 2 - figure supplement 4

## Pearson correlation

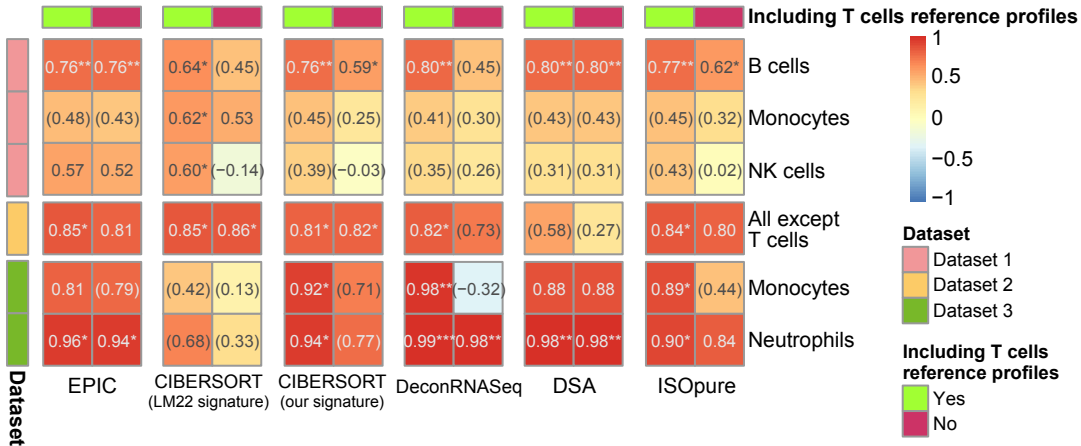

Supplement: supp [file elife-26476-supp-v1.zip › elife_poa_e26476_Figure_2_figure_supplement_4.pdf]
